# Supplementary material for: Hypoxia associated multi-omics molecular landscape of tumor tissue in patients with hepatocellular carcinoma
Source: publisher site journal article supplement (doi:10.18632/aging.202723), 2021-03-10
Supplement: Supplementary file [file aging-v13i5-202723-supplementary-material-SD6.pdf]

**Supplementary Table 5. Annotation for MCODE of protein-protein interaction enrichment network for high frequency DE-mRNAs.**

| <b>Network</b>        | <b>Annotation</b>                                                                                                                                                                                           |
|-----------------------|-------------------------------------------------------------------------------------------------------------------------------------------------------------------------------------------------------------|
| Input ID              | GO:0032787 monocarboxylic acid metabolic process -24.6;GO:0009611 response to wounding -23.6;hsa04610 Complement and coagulation cascades -22.6                                                             |
| Input ID_MCODE_ALL    | GO:0032787 monocarboxylic acid metabolic process -16.6;hsa01230 Biosynthesis of amino acids -16.0;GO:0044282 small molecule catabolic process -15.0                                                         |
| Input ID_SUB2_MCODE_1 | R-HSA-211897 Cytochrome P450 - arranged by substrate type -23.3;R-HSA-211945 Phase I - Functionalization of compounds -21.4;R-HSA-211859 Biological oxidations -18.4                                        |
| Input ID_SUB1_MCODE_2 | R-HSA-381426 Regulation of Insulin-like Growth Factor (IGF) transport and uptake by Insulin-like Growth Factor Bi -5.1;R-HSA-71387 Metabolism of carbohydrates -4.0;GO:0031589 cell-substrate adhesion -3.8 |
| Input ID_SUB1_MCODE_3 | R-HSA-375276 Peptide ligand-binding receptors -14.6;R-HSA-373076 Class A/1 (Rhodopsin-like receptors) -13.0;R-HSA-418594 G alpha (i) signalling events -12.4                                                |
| Input ID_SUB1_MCODE_4 | hsa01230 Biosynthesis of amino acids -8.5;GO:0044282 small molecule catabolic process -7.4;hsa00270 Cysteine and methionine metabolism -6.7                                                                 |
| Input ID_SUB1_MCODE_5 | GO:0046364 monosaccharide biosynthetic process -14.4;hsa01200 Carbon metabolism -14.0;GO:0016051 carbohydrate biosynthetic process -12.3                                                                    |
| Input ID_SUB1_MCODE_6 | R-HSA-5686938 Regulation of TLR by endogenous ligand -8.8;M264 PID TOLL ENDOGENOUS PATHWAY -8.4;R-HSA-6803157 Antimicrobial peptides -6.6                                                                   |
| Input ID_SUB1_MCODE_7 | M166 PID ATF2 PATHWAY -7.9;GO:0009991 response to extracellular stimulus -5.0;R-HSA-2262752 Cellular responses to stress -4.8                                                                               |

**Supplementary Table 6. Survival analysis for Differential expressed miRNAs in TCGA-LIHC.**

| <b>ID</b>         | <b>log-rank P value</b> | <b>factor</b> | <b>HR</b> | <b>up95</b> | <b>low95</b> |
|-------------------|-------------------------|---------------|-----------|-------------|--------------|
| hsa-miR-101-3p    | 0.002255                | protect       | 0.578932  | 0.820239    | 0.408615     |
| hsa-miR-139-5p    | 2.43E-07                | protect       | 0.394906  | 0.56083     | 0.278072     |
| hsa-miR-511-5p    | 0.391565                | protect       | 1.163998  | 1.648429    | 0.821928     |
| hsa-let-7c-3p     | 0.509074                | protect       | 0.88955   | 1.259684    | 0.628172     |
| hsa-miR-125b-2-3p | 0.061228                | protect       | 0.718071  | 1.017179    | 0.506917     |
| hsa-miR-34c-5p    | 0.52498                 | risk          | 1.11925   | 1.584939    | 0.79039      |
| hsa-miR-378c      | 0.277779                | protect       | 0.82486   | 1.168134    | 0.582463     |
| hsa-miR-5589-5p   | 0.229327                | protect       | 0.809008  | 1.14691     | 0.570659     |
| hsa-miR-99a-5p    | 0.008725                | protect       | 0.627161  | 0.888743    | 0.442571     |
| hsa-miR-34c-3p    | 0.978891                | protect       | 1.004682  | 1.422972    | 0.709351     |
| hsa-miR-5589-3p   | 0.420898                | protect       | 0.867101  | 1.228034    | 0.61225      |
| hsa-miR-877-5p    | 0.016982                | risk          | 1.529861  | 2.167074    | 1.080017     |
| hsa-miR-671-5p    | 0.295045                | risk          | 1.202313  | 1.702882    | 0.848888     |
| hsa-miR-378a-3p   | 0.196099                | risk          | 1.257156  | 1.781223    | 0.887279     |
| hsa-miR-301a-3p   | 0.008197                | risk          | 1.595768  | 2.262316    | 1.125605     |
| hsa-miR-187-3p    | 0.538865                | risk          | 1.11492   | 1.579794    | 0.786841     |
| hsa-miR-138-5p    | 0.650067                | risk          | 0.921018  | 1.311126    | 0.646981     |
| hsa-miR-4524a-3p  | 0.399592                | protect       | 0.861413  | 1.219765    | 0.60834      |
| hsa-miR-223-3p    | 0.951984                | risk          | 1.010698  | 1.431194    | 0.713747     |
| hsa-let-7a-2-3p   | 0.679079                | protect       | 0.929348  | 1.315997    | 0.656299     |
| hsa-miR-375-3p    | 0.456514                | protect       | 0.876533  | 1.2419      | 0.618658     |
| hsa-miR-223-5p    | 0.742728                | protect       | 0.943599  | 1.336783    | 0.666061     |
| hsa-miR-5588-3p   | 0.012826                | protect       | 0.640822  | 0.907489    | 0.452515     |
| hsa-miR-3189-3p   | 0.023056                | risk          | 1.490708  | 2.122278    | 1.047088     |
| hsa-miR-3680-3p   | 0.127824                | risk          | 1.30919   | 1.855126    | 0.923915     |
| hsa-miR-17-3p     | 0.083783                | risk          | 0.733445  | 1.038702    | 0.517898     |
| hsa-miR-194-3p    | 0.165805                | protect       | 0.782338  | 1.108308    | 0.55224      |
| hsa-miR-135b-5p   | 0.072067                | risk          | 1.376916  | 1.949932    | 0.972289     |
| hsa-miR-7112-3p   | 0.515253                | risk          | 1.123438  | 1.602959    | 0.787365     |
| hsa-miR-205-5p    | 0.171105                | risk          | 1.272456  | 1.804744    | 0.89716      |
| hsa-miR-100-5p    | 0.003693                | protect       | 0.598643  | 0.849333    | 0.421947     |
| hsa-miR-146a-5p   | 0.745306                | protect       | 1.059352  | 1.500225    | 0.748039     |
| hsa-miR-24-2-5p   | 0.081881                | risk          | 1.362826  | 1.9299      | 0.962379     |
| hsa-miR-885-5p    | 0.169666                | protect       | 0.784611  | 1.112856    | 0.553184     |
| hsa-miR-885-3p    | 0.603559                | protect       | 1.09687   | 1.554033    | 0.774195     |
| hsa-miR-1262      | 0.014415                | risk          | 1.539902  | 2.184093    | 1.085713     |
| hsa-miR-582-5p    | 0.388832                | risk          | 1.164231  | 1.650574    | 0.821189     |
| hsa-miR-582-3p    | 0.022381                | risk          | 1.493008  | 2.120278    | 1.051312     |
| hsa-miR-210-5p    | 0.024344                | risk          | 1.491626  | 2.113712    | 1.052627     |
| hsa-miR-217-5p    | 0.826759                | protect       | 1.039643  | 1.472817    | 0.733871     |
| hsa-miR-625-3p    | 0.578341                | protect       | 1.103574  | 1.562673    | 0.779354     |
| hsa-miR-29b-1-5p  | 0.870187                | risk          | 1.029333  | 1.457906    | 0.726746     |
| hsa-miR-21-3p     | 0.060608                | risk          | 1.393654  | 1.97479     | 0.983533     |
| hsa-miR-561-5p    | 0.0075                  | risk          | 1.62099   | 2.40279     | 1.093566     |
| hsa-miR-541-3p    | 0.568232                | protect       | 1.106522  | 1.566843    | 0.781438     |
| hsa-miR-216b-3p   | 0.46815                 | risk          | 1.150479  | 1.701683    | 0.77782      |
| hsa-miR-1224-5p   | 0.886944                | risk          | 1.025507  | 1.452126    | 0.724225     |
| hsa-miR-5588-5p   | 0.089422                | protect       | 0.739409  | 1.047195    | 0.522086     |
| hsa-miR-2355-3p   | 0.008464                | risk          | 1.595746  | 2.261333    | 1.126063     |
| hsa-miR-216a-3p   | 0.335209                | risk          | 1.186604  | 1.680295    | 0.837965     |
| hsa-miR-4449      | 0.844205                | protect       | 1.035457  | 1.466219    | 0.731249     |
| hsa-miR-653-5p    | 0.577505                | protect       | 1.103923  | 1.563284    | 0.779543     |

|                 |          |         |          |          |          |
|-----------------|----------|---------|----------|----------|----------|
| hsa-miR-194-5p  | 0.004083 | protect | 0.601321 | 0.851918 | 0.424439 |
| hsa-miR-548v    | 0.174238 | risk    | 1.271901 | 1.802342 | 0.897572 |
| hsa-miR-141-3p  | 0.535513 | risk    | 1.115914 | 1.580405 | 0.787941 |
| hsa-miR-216a-5p | 0.342731 | protect | 1.18372  | 1.676152 | 0.835959 |
| hsa-miR-155-5p  | 0.45926  | risk    | 1.140173 | 1.614518 | 0.805191 |
| hsa-miR-216b-5p | 0.131044 | protect | 1.308972 | 1.853506 | 0.924414 |
| hsa-miR-155-3p  | 0.832344 | risk    | 1.038098 | 1.470129 | 0.733029 |
| hsa-miR-210-3p  | 0.000975 | risk    | 1.791011 | 2.541255 | 1.262258 |
| hsa-miR-629-5p  | 0.040936 | protect | 1.442479 | 2.042647 | 1.018651 |
| hsa-miR-642a-5p | 0.690464 | risk    | 1.073046 | 1.519633 | 0.757701 |
| hsa-miR-200c-3p | 0.038228 | risk    | 1.443662 | 2.045728 | 1.018786 |
