# Supplementary material for: Hypoxia associated multi-omics molecular landscape of tumor tissue in patients with hepatocellular carcinoma
Source: Aging (Albany NY). 2021 Mar 10;13(5):6525–53. doi: 10.18632/aging.202723 (PMC7993683; doi:10.18632/aging.202723)
Supplement: Supplementary Table 2 [file aging-13-202723-s003.xlsx]

## Sheet: Table S2
Supplementary Table 2. High frequency DE-mRNA list extracted from 10 HCC cohorts
Gene	frequency	changes in high hypoxia score group
ANXA5	10	up-regulated
BNIP3L	10	up-regulated
NDRG1	10	up-regulated
RGS1	10	up-regulated
S100A11	10	up-regulated
ADM	9	up-regulated
CXCR4	9	up-regulated
DDIT4	9	up-regulated
ENO2	9	up-regulated
GPNMB	9	up-regulated
IGFBP3	9	up-regulated
LHFPL2	9	up-regulated
MMP12	9	up-regulated
MMP7	9	up-regulated
PFKFB3	9	up-regulated
PFKP	9	up-regulated
PFN2	9	up-regulated
PLOD2	9	up-regulated
RGS2	9	up-regulated
SLC2A3	9	up-regulated
TM4SF1	9	up-regulated
BCAT1	8	up-regulated
CTSC	8	up-regulated
DAB2	8	up-regulated
DUSP5	8	up-regulated
FCER1G	8	up-regulated
GCNT3	8	up-regulated
HIF1A	8	up-regulated
ITGAV	8	up-regulated
LOX	8	up-regulated
LY96	8	up-regulated
MARCKSL1	8	up-regulated
MMD	8	up-regulated
PLTP	8	up-regulated
PRNP	8	up-regulated
RND3	8	up-regulated
S100A9	8	up-regulated
SCPEP1	8	up-regulated
SCRN1	8	up-regulated
SLC38A1	8	up-regulated
SOX4	8	up-regulated
SPP1	8	up-regulated
STC1	8	up-regulated
ALDOA	7	up-regulated
ALOX5AP	7	up-regulated
BACE2	7	up-regulated
BAMBI	7	up-regulated
CA9	7	up-regulated
CCL20	7	up-regulated
CKS2	7	up-regulated
CLIC1	7	up-regulated
CORO1C	7	up-regulated
CTHRC1	7	up-regulated
CYR61	7	up-regulated
ENO1	7	up-regulated
EPDR1	7	up-regulated
FAM60A	7	up-regulated
GDF15	7	up-regulated
GOLM1	7	up-regulated
GPR137B	7	up-regulated
HK2	7	up-regulated
HMOX1	7	up-regulated
KLF4	7	up-regulated
LAMB1	7	up-regulated
LPCAT1	7	up-regulated
MARCKS	7	up-regulated
NPL	7	up-regulated
PLAUR	7	up-regulated
PLIN2	7	up-regulated
PPT1	7	up-regulated
QPCT	7	up-regulated
RAB31	7	up-regulated
S100A8	7	up-regulated
SERPINE1	7	up-regulated
SERPINE2	7	up-regulated
SLC2A1	7	up-regulated
SRGN	7	up-regulated
STK39	7	up-regulated
TNFRSF21	7	up-regulated
TYROBP	7	up-regulated
ASAH1	6	up-regulated
C12orf75	6	up-regulated
C1QC	6	up-regulated
CD44	6	up-regulated
COLEC12	6	up-regulated
EGLN3	6	up-regulated
EMP3	6	up-regulated
FMNL2	6	up-regulated
FOS	6	up-regulated
G6PD	6	up-regulated
HILPDA	6	up-regulated
HN1	6	up-regulated
ICAM1	6	up-regulated
IER3	6	up-regulated
IGF2BP3	6	up-regulated
ITGA2	6	up-regulated
JUN	6	up-regulated
LAPTM5	6	up-regulated
MAFF	6	up-regulated
MAP1LC3B	6	up-regulated
NAP1L1	6	up-regulated
NEDD9	6	up-regulated
OSMR	6	up-regulated
PAM	6	up-regulated
PGK1	6	up-regulated
PHLDA1	6	up-regulated
PNMA1	6	up-regulated
PPP1R15A	6	up-regulated
RHOQ	6	up-regulated
RRAGD	6	up-regulated
S100A6	6	up-regulated
SEL1L3	6	up-regulated
SERPINB1	6	up-regulated
SLC6A8	6	up-regulated
SPAG4	6	up-regulated
TMEM2	6	up-regulated
TMEM45A	6	up-regulated
TMEM51	6	up-regulated
VCAN	6	up-regulated
VNN2	6	up-regulated
ZFP36	6	up-regulated
ABCC1	5	up-regulated
ADAM9	5	up-regulated
ANKRD37	5	up-regulated
ANLN	5	up-regulated
ANXA2	5	up-regulated
ARL4C	5	up-regulated
ASAP1	5	up-regulated
ATF3	5	up-regulated
ATP1B3	5	up-regulated
B3GNT5	5	up-regulated
BCL2A1	5	up-regulated
C5AR1	5	up-regulated
C8orf4	5	up-regulated
CCDC109B	5	up-regulated
CCT2	5	up-regulated
CD24	5	up-regulated
CEP55	5	up-regulated
CLSTN1	5	up-regulated
CPVL	5	up-regulated
CSTB	5	up-regulated
CXCL5	5	up-regulated
CXCL6	5	up-regulated
DDIT3	5	up-regulated
DFNA5	5	up-regulated
DKK1	5	up-regulated
DPYSL2	5	up-regulated
DUSP6	5	up-regulated
ERO1L	5	up-regulated
ETV5	5	up-regulated
FOSL2	5	up-regulated
GAS2L3	5	up-regulated
GPR183	5	up-regulated
HAVCR2	5	up-regulated
HBEGF	5	up-regulated
KDELC2	5	up-regulated
LDHA	5	up-regulated
LGALS1	5	up-regulated
LRP12	5	up-regulated
LYZ	5	up-regulated
MAPRE1	5	up-regulated
MMP1	5	up-regulated
MMP9	5	up-regulated
MYLIP	5	up-regulated
NDUFA4L2	5	up-regulated
NPEPPS	5	up-regulated
NTS	5	up-regulated
OGFRL1	5	up-regulated
OLR1	5	up-regulated
OSTM1	5	up-regulated
PFKFB4	5	up-regulated
PKM	5	up-regulated
PKM2	5	up-regulated
PLBD1	5	up-regulated
PTGFRN	5	up-regulated
QSOX1	5	up-regulated
RNASE1	5	up-regulated
S100A4	5	up-regulated
SCD	5	up-regulated
SERPINB9	5	up-regulated
SLC1A5	5	up-regulated
SLC7A7	5	up-regulated
TKT	5	up-regulated
TLR2	5	up-regulated
TMSB10	5	up-regulated
TMSB4X	5	up-regulated
TNFAIP3	5	up-regulated
TSPAN13	5	up-regulated
UBE2Q2	5	up-regulated
VSIG4	5	up-regulated
WIPI1	5	up-regulated
ZDHHC2	5	up-regulated
MASP2	10	down-regulated
F12	9	down-regulated
FTCD	9	down-regulated
GNMT	9	down-regulated
MLXIPL	9	down-regulated
SLC10A1	9	down-regulated
SLC38A3	9	down-regulated
TFR2	9	down-regulated
AFM	8	down-regulated
AGXT	8	down-regulated
ALDH5A1	8	down-regulated
CYP27A1	8	down-regulated
EPHX1	8	down-regulated
GPLD1	8	down-regulated
HAAO	8	down-regulated
HRG	8	down-regulated
NR1I3	8	down-regulated
PKLR	8	down-regulated
RDH16	8	down-regulated
SLC22A1	8	down-regulated
SLC22A7	8	down-regulated
SLC27A5	8	down-regulated
SLC6A1	8	down-regulated
TMPRSS6	8	down-regulated
ACSM2A	7	down-regulated
APOA1	7	down-regulated
BDH1	7	down-regulated
BPHL	7	down-regulated
CES2	7	down-regulated
CFHR4	7	down-regulated
CGNL1	7	down-regulated
CHAD	7	down-regulated
CYP2A6	7	down-regulated
CYP2A7	7	down-regulated
CYP4A11	7	down-regulated
DGAT2	7	down-regulated
DHRS1	7	down-regulated
ETNK2	7	down-regulated
F13B	7	down-regulated
F7	7	down-regulated
FBP1	7	down-regulated
FETUB	7	down-regulated
FMO4	7	down-regulated
FNDC5	7	down-regulated
GAMT	7	down-regulated
GLYCTK	7	down-regulated
HGFAC	7	down-regulated
ITIH1	7	down-regulated
KLKB1	7	down-regulated
LECT2	7	down-regulated
OGDHL	7	down-regulated
PIPOX	7	down-regulated
PROC	7	down-regulated
SERPINA6	7	down-regulated
SERPINF2	7	down-regulated
SLC25A15	7	down-regulated
SPP2	7	down-regulated
TTR	7	down-regulated
WNK3	7	down-regulated
A1BG	6	down-regulated
ACSM2B	6	down-regulated
ADH1A	6	down-regulated
APOC2	6	down-regulated
APOC3	6	down-regulated
ARG1	6	down-regulated
BHMT	6	down-regulated
C8B	6	down-regulated
CLDN14	6	down-regulated
CLDN15	6	down-regulated
CNGA1	6	down-regulated
CRYL1	6	down-regulated
CUX2	6	down-regulated
CYP3A5	6	down-regulated
CYP3A7	6	down-regulated
CYP4F2	6	down-regulated
CYP7A1	6	down-regulated
DHTKD1	6	down-regulated
DPYS	6	down-regulated
EHHADH	6	down-regulated
F9	6	down-regulated
GJB1	6	down-regulated
HAGH	6	down-regulated
HFE2	6	down-regulated
HMGCS2	6	down-regulated
HPX	6	down-regulated
HSD17B8	6	down-regulated
ITIH2	6	down-regulated
KNG1	6	down-regulated
PEMT	6	down-regulated
PGLYRP2	6	down-regulated
PPP1R1A	6	down-regulated
PRAP1	6	down-regulated
RBP5	6	down-regulated
REEP6	6	down-regulated
RGN	6	down-regulated
SAA4	6	down-regulated
SERPINA4	6	down-regulated
SERPINC1	6	down-regulated
SLC17A4	6	down-regulated
SLC2A2	6	down-regulated
SORBS2	6	down-regulated
TM4SF4	6	down-regulated
TM7SF2	6	down-regulated
TTC39C	6	down-regulated
XDH	6	down-regulated
ZG16	6	down-regulated
ABAT	5	down-regulated
ABCB4	5	down-regulated
ACADSB	5	down-regulated
ACOX2	5	down-regulated
ACSM5	5	down-regulated
ADHFE1	5	down-regulated
AKR1D1	5	down-regulated
ALDOB	5	down-regulated
ANG	5	down-regulated
ANO1	5	down-regulated
ANXA10	5	down-regulated
ATP2B2	5	down-regulated
AZGP1	5	down-regulated
C6	5	down-regulated
CAT	5	down-regulated
CCL25	5	down-regulated
CFHR3	5	down-regulated
CGN	5	down-regulated
CLYBL	5	down-regulated
CPB2	5	down-regulated
CPS1	5	down-regulated
CYP2C9	5	down-regulated
CYP4F3	5	down-regulated
CYP4V2	5	down-regulated
DAO	5	down-regulated
DMGDH	5	down-regulated
DNASE1L3	5	down-regulated
ECHDC2	5	down-regulated
EPHA1	5	down-regulated
ESPN	5	down-regulated
F11	5	down-regulated
G6PC	5	down-regulated
GLS2	5	down-regulated
GOT2	5	down-regulated
GYS2	5	down-regulated
HGD	5	down-regulated
HPD	5	down-regulated
HSD17B13	5	down-regulated
IGFALS	5	down-regulated
IL6R	5	down-regulated
ITIH3	5	down-regulated
KHK	5	down-regulated
KLF15	5	down-regulated
KMO	5	down-regulated
LPA	5	down-regulated
MAT1A	5	down-regulated
MOGAT2	5	down-regulated
MUT	5	down-regulated
NR1I2	5	down-regulated
OLFM2	5	down-regulated
OSGIN1	5	down-regulated
PALMD	5	down-regulated
PANK1	5	down-regulated
PCK2	5	down-regulated
PHYH	5	down-regulated
PID1	5	down-regulated
PLA2G12B	5	down-regulated
PLG	5	down-regulated
PON1	5	down-regulated
PON3	5	down-regulated
PROZ	5	down-regulated
RBP4	5	down-regulated
SELENBP1	5	down-regulated
SERPINA10	5	down-regulated
SERPINA5	5	down-regulated
SHD	5	down-regulated
SLC16A2	5	down-regulated
SLC27A2	5	down-regulated
SLC27A3	5	down-regulated
SLCO2B1	5	down-regulated
TAT	5	down-regulated
TST	5	down-regulated
UPB1	5	down-regulated
