# Supplementary material for: Hypoxia associated multi-omics molecular landscape of tumor tissue in patients with hepatocellular carcinoma
Source: Aging (Albany NY). 2021 Mar 10;13(5):6525–53. doi: 10.18632/aging.202723 (PMC7993683; doi:10.18632/aging.202723)
Supplement: Supplementary Table 3 [file aging-13-202723-s004.xlsx]

## Sheet: Table S3
Supplementary Table 3. Survival analysis for high frequency DE-mRNAs in TCGA-LIHC and GSE14520
TCGA-LIHC							GSE14520
Gene	log-rank P value	factor	HR	up95	low95		Gene	log-rank P value	facotr	HR	up95	low95
MOGAT2	0.0314887	protect	0.684532	0.96559	0.485283		ABAT	0.0027233	protect	0.542127	0.811016	0.362386
PFN2	0.00284309	risk	1.69534	2.39178	1.2017		ABCB4	0.0202466	protect	0.623464	0.93245	0.416867
SLC2A1	0.000569132	risk	1.83744	2.59459	1.30124		ACADSB	0.0453326	protect	0.663903	0.991167	0.444695
LDHA	0.000186699	risk	1.9342	2.73203	1.36937		ACOX2	1.02e-05	protect	0.401397	0.600988	0.268091
VNN2	0.0160488	risk	1.52282	2.14949	1.07886		ACSM2B	0.000365314	protect	0.482233	0.721952	0.32211
ALDOA	0.0021959	risk	1.70881	2.41384	1.20971		ACSM5	0.00888584	protect	0.58606	0.876081	0.392049
PON1	0.00111197	protect	0.562786	0.794676	0.398563		ADAM9	0.041396	risk	1.51763	2.26594	1.01645
SCPEP1	0.033556	risk	1.45002	2.04802	1.02663		ADH1A	0.00140619	protect	0.518655	0.7752	0.347012
BDH1	0.00371981	protect	0.600824	0.848365	0.425511		ADM	0.0057317	risk	1.76344	2.63369	1.18075
SORBS2	9.86757e-05	protect	0.507523	0.718054	0.358719		AFM	0.020117	protect	0.622309	0.929963	0.416435
XDH	0.0103558	protect	0.638491	0.901581	0.452173		AGXT	3.76e-05	protect	0.429093	0.642893	0.286394
ABCC1	0.00170243	risk	1.73936	2.45533	1.23217		AKR1D1	0.00286733	protect	0.54088	0.807844	0.362139
CTHRC1	0.00886494	risk	1.58147	2.23245	1.12031		ALDH5A1	0.0259766	protect	0.635349	0.949844	0.424984
TNFAIP3	0.013347	risk	1.54212	2.17626	1.09276		ALDOA	0.0257881	risk	1.57659	2.35525	1.05536
ATP1B3	1.09669e-05	risk	2.17216	3.07101	1.5364		ALDOB	0.00297599	protect	0.543685	0.812558	0.363781
ENO1	6.88369e-05	risk	2.00574	2.83491	1.41909		ANXA10	0.0278948	protect	0.63811	0.953172	0.427188
HMGCS2	0.000374313	protect	0.536347	0.757527	0.379746		ANXA2	0.0105325	risk	1.68542	2.51888	1.12774
PON3	0.0219365	protect	0.670075	0.945606	0.474828		ANXA5	0.00608512	risk	1.75354	2.62052	1.17339
CTSC	0.000873808	risk	1.78677	2.52606	1.26385		APOA1	0.0132961	protect	0.60275	0.900563	0.403422
ITIH2	0.000304002	protect	0.530476	0.749811	0.3753		APOC2	0.0103041	protect	0.592045	0.884853	0.39613
CLSTN1	0.0457231	risk	1.4168	2.0004	1.00346		APOC3	0.000513019	protect	0.488959	0.731027	0.327048
SCRN1	0.0264068	risk	1.46847	2.0757	1.03888		ARG1	0.0140495	protect	0.603723	0.901423	0.40434
ACSM2A	0.0184862	protect	0.66274	0.935368	0.469574		ATP1B3	0.00204843	risk	1.87953	2.81023	1.25706
AKR1D1	0.00984473	protect	0.638029	0.901917	0.451351		ATP2B2	0.0324526	protect	0.646853	0.966706	0.432829
CLIC1	0.00210187	risk	1.7208	2.4288	1.21918		AZGP1	0.0449951	protect	0.664949	0.994029	0.444812
MAP1LC3B	0.0245965	risk	1.4823	2.09241	1.05009		BACE2	0.0493614	risk	1.4936	2.23087	0.999992
ADH1A	0.00339025	protect	0.596261	0.841355	0.422564		BDH1	0.000611003	protect	0.49575	0.741677	0.331368
HPX	0.00616964	protect	0.621191	0.878614	0.43919		BHMT	0.00085508	protect	0.504478	0.754436	0.337335
EPDR1	0.0144117	risk	1.53299	2.16612	1.08492		BPHL	0.0188168	protect	0.619452	0.925771	0.414488
DPYS	0.00965564	protect	0.635381	0.896868	0.450132		C8B	0.00471464	protect	0.561213	0.838943	0.375425
KHK	0.041897	protect	0.701838	0.991016	0.497043		C8orf4	0.0283089	risk	1.56809	2.341	1.05037
NR1I2	0.0143273	protect	0.650771	0.91868	0.460991		CA9	0.0288565	risk	1.56024	2.33215	1.04382
DNASE1L3	1.27715e-05	protect	0.471028	0.668422	0.331927		CAT	3.2e-05	protect	0.421283	0.630023	0.281703
MMP7	0.0237665	risk	1.48447	2.0955	1.05161		CCL20	0.0479978	risk	1.49893	2.23769	1.00407
HGD	0.0160153	protect	0.654717	0.923611	0.464107		CCL25	0.00366829	protect	0.55103	0.823336	0.368785
ACSM2B	0.029613	protect	0.68328	0.963835	0.48439		CCT2	0.0471324	risk	1.5015	2.24158	1.00577
GYS2	0.000358612	protect	0.528335	0.745264	0.374549		CD24	0.0103455	risk	1.68821	2.52313	1.12957
PNMA1	0.00345215	risk	1.67092	2.35948	1.1833		CEP55	0.00147849	risk	1.91507	2.86454	1.28031
TMPRSS6	0.00458279	protect	0.60962	0.861476	0.431395		CES2	0.00114494	protect	0.514272	0.769518	0.34369
SPAG4	0.0136186	risk	1.53407	2.17402	1.0825		CFHR4	0.0108402	protect	0.595293	0.890393	0.397997
C12orf75	0.000928238	risk	1.77412	2.5114	1.25328		CHAD	0.00105282	protect	0.508465	0.759639	0.340341
ECHDC2	0.0289417	protect	0.681179	0.961123	0.482774		CKS2	0.0179061	risk	1.62059	2.42215	1.08429
PGK1	0.000801977	risk	1.80075	2.54463	1.27433		CLDN15	2.74e-05	protect	0.42091	0.630177	0.281136
DAO	0.0108233	protect	0.639475	0.902577	0.453067		CLIC1	0.000214166	risk	2.12948	3.19039	1.42135
PKM	0.000331947	risk	1.87794	2.65268	1.32947		CLSTN1	0.0316889	risk	1.55175	2.31757	1.03899
IGFBP3	0.0212035	risk	1.49577	2.11167	1.05951		CNGA1	3.17e-05	protect	0.421278	0.630015	0.2817
CYP2C9	0.00030111	protect	0.532541	0.753172	0.376541		CORO1C	0.00334695	risk	1.82102	2.72343	1.21762
SOX4	0.01669	risk	1.52538	2.15183	1.0813		CPB2	0.00568322	protect	0.56779	0.848584	0.37991
IGFALS	0.00303867	protect	0.598533	0.847322	0.422792		CRYL1	0.0121412	protect	0.5988	0.894764	0.400733
HAGH	0.017392	protect	0.66024	0.932721	0.467361		CTSC	0.0487123	risk	1.49537	2.23354	1.00115
AZGP1	0.0373987	protect	0.694215	0.979632	0.491955		CUX2	0.00094983	protect	0.510862	0.765441	0.340954
PLAUR	0.0124837	risk	1.55202	2.18923	1.10029		CXCL5	0.0284429	risk	1.567	2.33935	1.04964
GAS2L3	4.55442e-05	risk	2.05392	2.90252	1.45343		CXCR4	0.014498	risk	1.65626	2.47187	1.10977
SELENBP1	0.0374296	protect	0.695177	0.981322	0.492469		CYP27A1	0.000687192	protect	0.500696	0.749718	0.334388
IGF2BP3	0.031128	risk	1.45555	2.05708	1.02991		CYP2A6	0.000777154	protect	0.499938	0.74712	0.334535
F9	0.000668708	protect	0.551253	0.779081	0.390049		CYP2A7	0.00412548	protect	0.554664	0.828673	0.371258
ANXA10	0.000782131	protect	0.551473	0.778264	0.39077		CYP3A5	0.00341427	protect	0.548224	0.819217	0.366874
ETV5	0.00119406	risk	1.7668	2.49582	1.25072		CYP3A7	0.0356415	protect	0.651544	0.97359	0.436025
BAMBI	0.000221467	risk	1.89966	2.68739	1.34283		CYP4A11	0.000190048	protect	0.465426	0.696634	0.310955
NAP1L1	0.00489092	risk	1.64275	2.31827	1.16407		CYP4F3	0.0123917	protect	0.599653	0.896016	0.401314
ALDOB	0.00503922	protect	0.610866	0.862349	0.432722		CYP7A1	0.000143331	protect	0.456347	0.682631	0.305074
UPB1	0.00012481	protect	0.50874	0.718783	0.360076		DAB2	0.00401972	risk	1.80076	2.69249	1.20436
SLC10A1	0.00250289	protect	0.589329	0.831672	0.417602		DAO	0.00498508	protect	0.562786	0.841248	0.376498
RHOQ	0.000132423	risk	1.95873	2.76894	1.38559		DDIT3	0.0135284	risk	1.66066	2.47963	1.11218
NPEPPS	0.00802341	risk	1.59082	2.24685	1.12633		DDIT4	0.00926093	risk	1.70939	2.55194	1.14501
SPP1	5.3956e-05	risk	2.02581	2.86385	1.43301		DHRS1	7.52e-07	protect	0.359996	0.540005	0.239993
PGLYRP2	0.00719217	protect	0.624775	0.882511	0.44231		DHTKD1	0.00322646	protect	0.547885	0.819434	0.366324
CKS2	0.00733458	risk	1.59901	2.25861	1.13204		DNASE1L3	0.00144212	protect	0.523116	0.783279	0.349365
FMO4	0.0422409	protect	0.700584	0.988531	0.496513		DPYS	0.013842	protect	0.604267	0.902792	0.404455
STK39	0.000179165	risk	1.91195	2.70734	1.35024		DUSP5	0.00809431	risk	1.72124	2.57143	1.15215
ANXA2	0.0238277	risk	1.48239	2.09345	1.0497		DUSP6	0.0054468	risk	1.76694	2.64093	1.1822
ZG16	0.0459011	protect	0.705938	0.996722	0.499988		ECHDC2	1.52e-05	protect	0.410538	0.615075	0.274018
HILPDA	3.12313e-09	risk	2.81198	3.98839	1.98255		EGLN3	0.00755995	risk	1.72804	2.58175	1.15662
CA9	0.000230099	risk	1.90504	2.69328	1.34749		EHHADH	4.88e-05	protect	0.434162	0.65027	0.289875
GPLD1	0.00686866	protect	0.623477	0.880284	0.441588		ENO1	0.00922114	risk	1.70555	2.54761	1.14182
NPL	0.0354723	risk	1.444	2.03847	1.02289		EPHA1	0.0105323	protect	0.591733	0.88376	0.396202
HGFAC	0.0113982	protect	0.64102	0.904733	0.454175		EPHX1	6.99e-05	protect	0.443469	0.664664	0.295885
SERPINA6	0.0485884	protect	0.708792	1.00116	0.501804		ETNK2	3.52e-05	protect	0.423407	0.63313	0.283154
RGN	0.0111084	protect	0.641027	0.90511	0.453995		ETV5	0.0153065	risk	1.64283	2.45414	1.09973
TSPAN13	0.00663999	risk	1.60644	2.27058	1.13657		F11	0.00132429	protect	0.518398	0.775544	0.346514
AFM	0.00104041	protect	0.563644	0.796272	0.398977		F12	8.54e-06	protect	0.400883	0.601042	0.267381
ANLN	0.000112404	risk	1.95768	2.77151	1.38283		F13B	0.00240654	protect	0.538456	0.805654	0.359875
MARCKSL1	0.000286589	risk	1.9079	2.69212	1.35212		FAM60A	0.0323552	risk	1.54675	2.31161	1.03497
ADM	0.0136412	risk	1.54482	2.17947	1.09498		FBP1	0.00100812	protect	0.506994	0.757478	0.33934
CPB2	0.00196339	protect	0.583459	0.824225	0.413023		FETUB	0.000967809	protect	0.509467	0.762504	0.340399
LPA	0.0314952	protect	0.685764	0.967832	0.485903		FMO4	2.14e-05	protect	0.419097	0.628366	0.279522
ITGAV	0.00267703	risk	1.68298	2.37803	1.19108		FTCD	0.0151926	protect	0.608745	0.909372	0.407501
CFHR4	2.62186e-05	protect	0.480266	0.679874	0.339262		G6PC	0.0050268	protect	0.564621	0.844715	0.377402
CGNL1	0.00157785	protect	0.578052	0.817776	0.408602		G6PD	0.0221323	risk	1.59808	2.38633	1.07021
PFKFB4	5.43871e-05	risk	2.03172	2.87237	1.4371		GAMT	0.0411466	protect	0.659492	0.985262	0.441436
CCT2	0.0026816	risk	1.68678	2.38664	1.19215		GCNT3	0.0173941	risk	1.62461	2.42826	1.08693
CFHR3	5.91249e-05	protect	0.492911	0.69684	0.348662		GDF15	0.0122692	risk	1.672	2.49678	1.11968
PROZ	0.0125006	protect	0.644154	0.908824	0.456562		GJB1	0.00177948	protect	0.525964	0.785922	0.351992
CPS1	0.000494835	protect	0.541597	0.764826	0.383521		GLS2	0.0372171	protect	0.653047	0.975159	0.437334
BHMT	0.0426519	protect	0.702765	0.992305	0.497708		GNMT	5.02e-05	protect	0.432437	0.646994	0.289031
HN1	3.99825e-07	risk	2.46885	3.48999	1.74648		GOLM1	0.000870297	risk	1.98647	2.96826	1.32942
SLC27A5	0.0424143	protect	0.701617	0.990301	0.497088		GOT2	0.00105005	protect	0.510083	0.762639	0.341164
DHRS1	0.000611439	protect	0.5483	0.774538	0.388145		GPLD1	0.00051179	protect	0.488801	0.730796	0.32694
DAB2	0.0103947	risk	1.57011	2.21546	1.11275		HAAO	0.0124895	protect	0.600155	0.896753	0.401656
APOA1	0.0213266	protect	0.668469	0.944152	0.473283		HAGH	0.000101343	protect	0.451294	0.676045	0.301262
EHHADH	0.0152435	protect	0.652902	0.92132	0.462685		HGD	0.000206326	protect	0.468896	0.702533	0.312958
RBP5	0.0218149	protect	0.666326	0.93976	0.472451		HIF1A	0.00116226	risk	1.94265	2.90677	1.29831
SERPINF2	0.00833519	protect	0.629453	0.888607	0.445879		HK2	0.00966603	risk	1.69568	2.5345	1.13447
PLBD1	0.0119794	risk	1.55539	2.1952	1.10206		HMGCS2	9.66e-05	protect	0.447918	0.670321	0.299305
LHFPL2	0.00107762	risk	1.79466	2.53103	1.27252		HMOX1	0.044182	risk	1.50859	2.25228	1.01047
COLEC12	0.00623602	risk	1.61166	2.27472	1.14188		HN1	0.036368	risk	1.53218	2.28945	1.0254
ITIH1	0.00549335	protect	0.612546	0.864139	0.434205		HPD	0.000474464	protect	0.489171	0.732071	0.326864
DMGDH	0.000440934	protect	0.536356	0.756892	0.380077		HRG	0.00348202	protect	0.548842	0.820125	0.367295
LGALS1	0.0110474	risk	1.56456	2.20756	1.10885		HSD17B8	0.00162379	protect	0.526234	0.787823	0.351503
ENO2	0.000897864	risk	1.79288	2.53196	1.26954		IER3	4.66e-05	risk	2.32111	3.47307	1.55124
ALDH5A1	0.00480162	protect	0.610397	0.861129	0.43267		IGF2BP3	0.020099	risk	1.60404	2.39899	1.07251
ADAM9	0.000363408	risk	1.87031	2.64323	1.32341		IGFBP3	0.000491848	risk	2.06753	3.08706	1.38471
LPCAT1	1.86987e-07	risk	2.49182	3.52885	1.75954		IL6R	0.0260081	protect	0.634503	0.94787	0.424736
CCL25	0.0190249	protect	0.664664	0.939388	0.470284		ITIH1	0.0328164	protect	0.646431	0.965416	0.432843
FTCD	0.00945208	protect	0.633004	0.893236	0.448587		JUN	0.0441027	risk	1.50938	2.25347	1.01099
CSTB	0.00644639	risk	1.61227	2.27559	1.14231		KLF4	0.00169754	risk	1.91245	2.85596	1.28064
MAFF	0.0170982	risk	1.52077	2.14583	1.07778		KLKB1	0.00608327	protect	0.570118	0.851998	0.381497
HAAO	0.023189	protect	0.671994	0.94863	0.47603		KNG1	1.5e-05	protect	0.407749	0.61025	0.272444
PPT1	0.00157938	risk	1.74534	2.46388	1.23635		LAMB1	0.00318267	risk	1.8261	2.7312	1.22094
EGLN3	0.000333388	risk	1.86486	2.63899	1.31782		LDHA	0.00525751	risk	1.76873	2.64365	1.18337
CYP4V2	0.0124724	protect	0.646959	0.914292	0.457792		LECT2	0.00946758	protect	0.588632	0.87985	0.393804
G6PD	0.000226526	risk	1.90988	2.70027	1.35084		LHFPL2	0.00215598	risk	1.87023	2.79877	1.24974
RNASE1	0.0165334	protect	1.52831	2.15539	1.08367		LOX	0.00265886	risk	1.85099	2.76671	1.23835
CEP55	0.000147446	risk	1.93783	2.74064	1.37019		LPCAT1	0.0110139	risk	1.68137	2.51272	1.12508
MAPRE1	0.0199385	risk	1.5058	2.12453	1.06727		LRP12	0.00451415	risk	1.79671	2.68249	1.20342
GCNT3	0.0210289	risk	1.49892	2.11537	1.06211		MAFF	0.00361089	risk	1.82257	2.72159	1.22052
GDF15	0.0319986	risk	1.45668	2.0552	1.03247		MAPRE1	0.00367683	risk	1.81026	2.70699	1.21058
S100A11	0.0483154	risk	1.41314	1.99334	1.00183		MARCKS	5.75e-06	risk	2.55191	3.82338	1.70326
OGFRL1	0.000373292	risk	1.88098	2.65464	1.33279		MARCKSL1	0.000800857	risk	1.98981	2.97597	1.33044
C6	0.0422766	protect	0.701703	0.991316	0.496701		MASP2	0.00021665	protect	0.466033	0.6968	0.311692
CYP27A1	0.00774163	protect	0.62552	0.882323	0.443461		MAT1A	0.0306785	protect	0.643855	0.962311	0.430786
PFKFB3	0.0131657	risk	1.54574	2.18142	1.0953		MLXIPL	0.0153444	protect	0.609054	0.909826	0.407711
SERPINC1	0.0306668	protect	0.686161	0.96809	0.486336		MMD	0.010511	risk	1.6863	2.52022	1.12832
KDELC2	0.000404911	risk	1.86138	2.63036	1.3172		MMP12	0.000173631	risk	2.16812	3.24243	1.44976
VCAN	0.0448556	risk	1.42128	2.00488	1.00756		MMP9	0.0449398	risk	1.50521	2.24848	1.00765
CYP3A5	0.00100786	protect	0.561904	0.793448	0.397929		MUT	0.00108645	protect	0.51124	0.764334	0.341954
B3GNT5	0.0137696	risk	1.54342	2.17748	1.09399		MYLIP	0.00678275	risk	1.74124	2.60181	1.16531
LAMB1	0.0107526	risk	1.56548	2.2096	1.10913		NAP1L1	0.00508206	risk	1.77021	2.64833	1.18325
ABAT	0.00315329	protect	0.594866	0.839406	0.421567		NDRG1	0.00449953	risk	1.78151	2.66564	1.19062
SLC38A3	0.0396418	protect	0.698765	0.986323	0.495043		NDUFA4L2	7.85e-06	risk	2.51959	3.77359	1.6823
SLC6A1	0.000836989	protect	0.556083	0.785352	0.393744		NEDD9	3.93e-05	risk	2.33854	3.49979	1.5626
CXCL5	0.0211826	risk	1.49072	2.1078	1.0543		NR1I2	0.0219246	protect	0.625316	0.93376	0.418759
KLF15	0.0473866	risk	0.70353	0.992207	0.498842		NR1I3	3.88e-05	protect	0.427636	0.639985	0.285745
LOX	0.014324	risk	1.53834	2.17087	1.09011		NTS	1.92e-06	risk	2.67836	4.01306	1.78757
RGS2	0.0309895	risk	1.45763	2.05797	1.03242		OGDHL	0.0042575	protect	0.558603	0.835927	0.373283
S100A9	0.0348932	risk	1.44745	2.04206	1.02598		OSGIN1	0.0131564	protect	0.603348	0.902176	0.403501
PLOD2	0.000534717	risk	1.83271	2.59067	1.29651		PCK2	0.000144291	protect	0.458696	0.686823	0.306342
ANO1	0.0047553	protect	0.608855	0.859221	0.431442		PEMT	0.0146307	protect	0.608191	0.909266	0.406807
CYP7A1	0.0167644	protect	0.656171	0.925648	0.465145		PFKFB3	0.000894802	risk	1.98485	2.96581	1.32836
DGAT2	0.0456102	protect	0.705668	0.996346	0.499794		PHYH	0.0148873	protect	0.608556	0.909801	0.407057
NDRG1	0.00761374	risk	1.59538	2.2534	1.12951		PID1	0.000130805	protect	0.4522	0.675911	0.302532
ADHFE1	0.0124673	protect	0.644078	0.908388	0.456674		PIPOX	3.91e-06	protect	0.385745	0.578214	0.257343
MARCKS	0.018204	risk	1.51819	2.14128	1.07642		PKM	3.24e-05	risk	2.3431	3.51114	1.56363
SLC22A1	9.89184e-05	protect	0.502893	0.71027	0.356063		PLG	0.0171759	protect	0.614185	0.917372	0.4112
DFNA5	0.0010572	risk	1.79263	2.52886	1.27074		PLOD2	7.59e-06	risk	2.51983	3.77397	1.68246
FAM60A	0.0184716	risk	1.50167	2.12227	1.06255		PNMA1	0.00176655	risk	1.90288	2.84342	1.27345
APOC3	0.00353796	protect	0.601122	0.849696	0.425267		PON1	0.017121	protect	0.614787	0.918931	0.411308
F13B	0.0160628	protect	0.655484	0.925248	0.464372		PON3	0.0272028	protect	0.636883	0.951369	0.426354
SLC38A1	0.0029744	risk	1.66726	2.36213	1.17681		PROZ	0.00884395	protect	0.584703	0.87342	0.391425
CNGA1	0.0275635	protect	0.681224	0.96189	0.482452		RBP4	0.00279151	protect	0.541719	0.809675	0.362441
HSD17B13	0.000768867	protect	0.554405	0.783452	0.392322		RDH16	0.00267454	protect	0.539973	0.807115	0.36125
TMSB10	0.00604558	risk	1.62271	2.28971	1.15001		RGN	0.00429557	protect	0.557576	0.833615	0.372943
ANXA5	0.000122367	risk	1.9427	2.75207	1.37136		RGS2	1.44e-05	risk	2.45684	3.67716	1.64151
SPP2	0.000750054	protect	0.554878	0.784604	0.392414		S100A6	0.0211522	risk	1.60075	2.39195	1.07126
GNMT	0.015229	protect	0.653946	0.923104	0.463269		S100A9	0.0355808	risk	1.53645	2.29441	1.02889
HRG	0.000276193	protect	0.525925	0.742661	0.37244		SCD	0.00436969	risk	1.80121	2.68929	1.2064
RDH16	0.00930646	protect	0.634071	0.895043	0.449193		SCRN1	0.00406804	risk	1.80386	2.69502	1.20739
ITGA2	0.0136917	risk	1.53778	2.17301	1.08825		SELENBP1	0.0395225	protect	0.656988	0.981584	0.439732
BCAT1	0.00068265	risk	1.82977	2.58166	1.29686		SERPINA10	0.000286603	protect	0.47	0.702047	0.314652
GOT2	0.000276608	protect	0.52711	0.744697	0.373098		SERPINA6	0.0067946	protect	0.575619	0.860793	0.384921
IER3	0.00259121	risk	1.69712	2.39594	1.20213		SERPINC1	0.000452542	protect	0.485752	0.726333	0.324858
MMD	0.000477075	risk	1.84517	2.60704	1.30594		SERPINE1	0.00025534	risk	2.12702	3.17969	1.42285
KNG1	0.0021586	protect	0.583437	0.823786	0.413212		SLC10A1	2.62e-05	protect	0.422413	0.633183	0.281803
SLC2A2	0.00079308	protect	0.558868	0.790678	0.39502		SLC16A2	0.00863275	protect	0.584857	0.874317	0.391228
A1BG	0.00252692	protect	0.586918	0.828051	0.416004		SLC17A4	0.00149174	protect	0.518506	0.774404	0.347168
HK2	0.0078892	risk	1.59802	2.25457	1.13267		SLC1A5	0.0017864	risk	1.89657	2.83626	1.26822
SERPINA4	0.00517685	protect	0.610457	0.861213	0.432713		SLC22A1	0.0296063	protect	0.641148	0.957641	0.429254
CYP4A11	0.0216859	protect	0.670554	0.946276	0.475171		SLC22A7	0.000325357	protect	0.477643	0.714472	0.319317
CHAD	0.00147352	protect	0.574472	0.812257	0.406297		SLC25A15	7.06e-05	protect	0.438986	0.656566	0.293511
C8B	0.00129828	protect	0.572382	0.810588	0.404177		SLC27A2	0.00423005	protect	0.5556	0.830049	0.371896
MYLIP	0.0234189	risk	1.49202	2.1045	1.05779		SLC27A5	1.15e-05	protect	0.403305	0.603769	0.269399
FMNL2	0.0173254	risk	1.51722	2.14238	1.07449		SLC2A2	3.94e-05	protect	0.427866	0.640321	0.285902
ASAH1	0.0234137	risk	1.49052	2.10279	1.05652		SLC38A1	0.00426171	risk	1.79367	2.68167	1.19972
SLC25A15	0.000660758	protect	0.55069	0.778301	0.389643		SLC38A3	0.00412167	protect	0.556318	0.831773	0.372084
HIF1A	0.00283154	risk	1.69802	2.39508	1.20383		SLC6A1	0.000175523	protect	0.463219	0.693415	0.309442
SLC22A7	0.00305457	protect	0.596345	0.84308	0.42182		SLCO2B1	0.000117048	protect	0.449655	0.672182	0.300796
CAT	0.017326	protect	0.657127	0.92683	0.465906		SORBS2	5.69e-05	protect	0.435075	0.650849	0.290836
MMP12	0.0474121	risk	1.41369	1.99595	1.00129		SOX4	2.81e-06	risk	2.62286	3.93297	1.74915
PFKP	0.000801727	risk	1.80949	2.55359	1.28222		SPAG4	0.0379755	risk	1.52512	2.27871	1.02075
MMP9	0.00752125	risk	1.60255	2.26101	1.13585		SPP1	0.00363261	risk	1.8112	2.70842	1.2112
LECT2	0.0134851	protect	0.647579	0.913887	0.458874		SPP2	2.51e-05	protect	0.419428	0.628017	0.28012
SERPINE2	0.0375807	risk	1.44204	2.03398	1.02237		STC1	0.00129292	risk	1.94257	2.9016	1.30052
SERPINA10	0.00326066	protect	0.595816	0.84103	0.422097		TAT	0.00519429	protect	0.564223	0.843354	0.377478
MMP1	0.000728954	risk	1.8106	2.55738	1.28189		TFR2	0.0493745	protect	0.669551	1.00005	0.448275
PIPOX	0.0357908	protect	0.691979	0.976508	0.490354		TM4SF1	0.0183438	risk	1.61786	2.41799	1.0825
SLC1A5	0.000331275	risk	1.88642	2.66352	1.33605		TMPRSS6	0.0239169	protect	0.630671	0.942239	0.422128
G6PC	0.000297566	protect	0.530634	0.75003	0.375415		TMSB10	0.00789099	risk	1.71984	2.57134	1.15032
TAT	0.00130935	protect	0.568779	0.803404	0.402674		TMSB4X	0.00770031	risk	1.73025	2.58346	1.15882
TM4SF1	0.00756676	risk	1.59302	2.25001	1.12787		TNFRSF21	0.00898766	risk	1.70415	2.5474	1.14003
CORO1C	0.00026139	risk	1.90721	2.69331	1.35055		TSPAN13	0.0201528	risk	1.60625	2.40031	1.07487
PRNP	0.0106542	risk	1.56136	2.20462	1.10579		TTR	1.92e-06	protect	0.37005	0.553874	0.247235
CYP4F2	0.0132167	protect	0.649302	0.917543	0.459481		UPB1	0.000512834	protect	0.490801	0.734451	0.327981
							VNN2	0.016408	risk	1.63649	2.44311	1.09619
							ZG16	0.0031399	protect	0.543795	0.812134	0.364119
