# Supplementary material for: Hypoxia associated multi-omics molecular landscape of tumor tissue in patients with hepatocellular carcinoma
Source: Aging (Albany NY). 2021 Mar 10;13(5):6525–53. doi: 10.18632/aging.202723 (PMC7993683; doi:10.18632/aging.202723)
Supplement: Supplementary Table 4 [file aging-13-202723-s005.xlsx]

## Sheet: Table S4
Supplementary Table 4. Biological Processes and pathway functional enrichment analysis for high frequency DE-mRNAs.
CateGO-BPry	CategoryID	GO	Description	LogP	Enrichment	Z-score	#TotalGeneInLibrary	#GeneInGO	#GeneInHitList	#GeneInGOAndHitList	%InGO	STDV %InGO	GeneID	Hits	Log(q-value)	GeneList
Canonical	11	M3468	NABA ECM REGULATORS	-20	8.8	15	24156	238	370	32	8.6	1.5	462|866|1075|1476|1992|2155|2158|2161|2165|3273|3697|3698|3699|3827|4015|4018|4312|4316|4318|4321|5054|5104|5267|5270|5272|5340|5345|5352|8754|10747|51156|112399	SERPINC1|SERPINA6|CTSC|CSTB|SERPINB1|F7|F9|F12|F13B|HRG|ITIH1|ITIH2|ITIH3|KNG1|LOX|LPA|MMP1|MMP7|MMP9|MMP12|SERPINE1|SERPINA5|SERPINA4|SERPINE2|SERPINB9|PLG|SERPINF2|PLOD2|ADAM9|MASP2|SERPINA10|EGLN3	-17	Input ID
Canonical	11	M255	PID HIF1 TFPATHWAY	-19	19	18	24156	66	370	19	5.1	1.1	123|133|226|768|2023|2353|3091|3099|3162|3725|3939|5054|5209|5230|5315|6513|7852|10397|112399	PLIN2|ADM|ALDOA|CA9|ENO1|FOS|HIF1A|HK2|HMOX1|JUN|LDHA|SERPINE1|PFKFB3|PGK1|PKM|SLC2A1|CXCR4|NDRG1|EGLN3	-15	Input ID
Canonical	11	M5885	NABA MATRISOME ASSOCIATED	-18	4.4	12	24156	753	370	51	14	1.8	302|308|462|714|866|1075|1476|1839|1992|2155|2158|2161|2165|3083|3263|3273|3697|3698|3699|3827|3956|4015|4018|4312|4316|4318|4321|5054|5104|5267|5270|5272|5340|5345|5352|6275|6277|6279|6280|6282|6364|6370|6372|6374|8754|9518|10747|11199|51156|81035|112399	ANXA2|ANXA5|SERPINC1|C1QC|SERPINA6|CTSC|CSTB|HBEGF|SERPINB1|F7|F9|F12|F13B|HGFAC|HPX|HRG|ITIH1|ITIH2|ITIH3|KNG1|LGALS1|LOX|LPA|MMP1|MMP7|MMP9|MMP12|SERPINE1|SERPINA5|SERPINA4|SERPINE2|SERPINB9|PLG|SERPINF2|PLOD2|S100A4|S100A6|S100A8|S100A9|S100A11|CCL20|CCL25|CXCL6|CXCL5|ADAM9|GDF15|MASP2|ANXA10|SERPINA10|COLEC12|EGLN3	-15	Input ID
Canonical	11	M145	PID P53 DOWNSTREAM PATHWAY	-6.7	6.2	7.6	24156	137	370	13	3.5	0.96	467|597|665|1462|1847|3486|3725|5054|6696|9518|10397|22943|54541	ATF3|BCL2A1|BNIP3L|VCAN|DUSP5|IGFBP3|JUN|SERPINE1|SPP1|GDF15|NDRG1|DKK1|DDIT4	-4.8	Input ID
Canonical	11	M106	PID HNF3B PATHWAY	-6.4	12	8.9	24156	45	370	8	2.2	0.76	229|335|622|2538|5313|6514|6898|7276	ALDOB|APOA1|BDH1|G6PC|PKLR|SLC2A2|TAT|TTR	-4.5	Input ID
Canonical	11	M167	PID AP1 PATHWAY	-5.9	8.4	7.7	24156	70	370	9	2.4	0.8	467|2353|2355|3091|3491|3725|4312|4318|4922	ATF3|FOS|FOSL2|HIF1A|CCN1|JUN|MMP1|MMP9|NTS	-4.1	Input ID
Canonical	11	M174	PID UPA UPAR PATHWAY	-5.5	11	8	24156	42	370	7	1.9	0.71	2822|3685|4318|4321|5054|5329|5340	GPLD1|ITGAV|MMP9|MMP12|SERPINE1|PLAUR|PLG	-3.7	Input ID
Canonical	11	M63	PID AVB3 OPN PATHWAY	-5.2	13	8.1	24156	31	370	6	1.6	0.66	960|2353|3685|3725|4318|6696	CD44|FOS|ITGAV|JUN|MMP9|SPP1	-3.4	Input ID
Canonical	11	M65	PID FRA PATHWAY	-4.7	11	7.3	24156	37	370	6	1.6	0.66	2355|3162|3725|4312|4318|5329	FOSL2|HMOX1|JUN|MMP1|MMP9|PLAUR	-3	Input ID
Canonical	11	M264	PID TOLL ENDOGENOUS PATHWAY	-4.5	13	7.5	24156	25	370	5	1.4	0.6	1462|6279|6280|7097|23643	VCAN|S100A8|S100A9|TLR2|LY96	-2.8	Input ID
Canonical	11	M169	PID INTEGRIN2 PATHWAY	-4.1	11	6.9	24156	29	370	5	1.4	0.6	3383|3491|3827|5329|5624	ICAM1|CCN1|KNG1|PLAUR|PROC	-2.5	Input ID
Canonical	11	M166	PID ATF2 PATHWAY	-3.5	6.6	5.4	24156	59	370	6	1.6	0.66	383|467|1649|1847|2353|3725	ARG1|ATF3|DDIT3|DUSP5|FOS|JUN	-2	Input ID
Canonical	11	M159	PID AMB2 NEUTROPHILS PATHWAY	-3.4	8	5.6	24156	41	370	5	1.4	0.6	3383|4018|4318|5329|5340	ICAM1|LPA|MMP9|PLAUR|PLG	-1.9	Input ID
Canonical	11	M53	PID INTEGRIN3 PATHWAY	-3.3	7.6	5.4	24156	43	370	5	1.4	0.6	3491|3685|3912|5329|6696	CCN1|ITGAV|LAMB1|PLAUR|SPP1	-1.8	Input ID
Canonical	11	M223	PID BETA CATENIN NUC PATHWAY	-2.8	4.9	4.4	24156	80	370	6	1.6	0.66	1462|3491|3725|4318|9314|22943	VCAN|CCN1|JUN|MMP9|KLF4|DKK1	-1.4	Input ID
Canonical	11	M276	PID FGF PATHWAY	-2.8	5.9	4.6	24156	55	370	5	1.4	0.6	2353|3725|4318|5329|6696	FOS|JUN|MMP9|PLAUR|SPP1	-1.4	Input ID
Canonical	11	M115	PID REG GR PATHWAY	-2.8	4.8	4.3	24156	82	370	6	1.6	0.66	2353|3383|3725|4312|5106|9970	FOS|ICAM1|JUN|MMP1|PCK2|NR1I3	-1.4	Input ID
Canonical	11	M44	PID HIF2PATHWAY	-2.8	7.7	4.9	24156	34	370	4	1.1	0.54	5054|5230|6513|112399	SERPINE1|PGK1|SLC2A1|EGLN3	-1.4	Input ID
Canonical	11	M212	PID INTEGRIN5 PATHWAY	-2.7	12	5.4	24156	17	370	3	0.81	0.47	3491|3685|5329	CCN1|ITGAV|PLAUR	-1.3	Input ID
Canonical	11	M254	PID MYC REPRESS PATHWAY	-2.6	5.2	4.1	24156	63	370	5	1.4	0.6	1649|3158|3956|10397|22943	DDIT3|HMGCS2|LGALS1|NDRG1|DKK1	-1.2	Input ID
Canonical	11	M18	PID INTEGRIN1 PATHWAY	-2.5	4.9	4	24156	66	370	5	1.4	0.6	3673|3685|3912|5329|6696	ITGA2|ITGAV|LAMB1|PLAUR|SPP1	-1.1	Input ID
Canonical	11	M206	PID PDGFRA PATHWAY	-2.4	8.9	4.6	24156	22	370	3	0.81	0.47	2353|3685|3725	FOS|ITGAV|JUN	-1	Input ID
Canonical	11	M70	PID PS1 PATHWAY	-2.3	5.7	4	24156	46	370	4	1.1	0.54	2353|3725|4851|22943	FOS|JUN|NOTCH1|DKK1	-0.97	Input ID
Canonical	11	M5883	NABA SECRETED FACTORS	-2.1	2.3	3	24156	344	370	12	3.2	0.92	1839|3083|6275|6277|6279|6280|6282|6364|6370|6372|6374|9518	HBEGF|HGFAC|S100A4|S100A6|S100A8|S100A9|S100A11|CCL20|CCL25|CXCL6|CXCL5|GDF15	-0.87	Input ID
Canonical	11	M66	PID MYC ACTIV PATHWAY	-2.1	4.1	3.5	24156	79	370	5	1.4	0.6	586|2023|3939|4318|6513	BCAT1|ENO1|LDHA|MMP9|SLC2A1	-0.86	Input ID
Canonical	11	M7871	ST GRANULE CELL SURVIVAL PATHWAY	-2.1	7.3	4.1	24156	27	370	3	0.81	0.47	427|2353|3725	ASAH1|FOS|JUN	-0.83	Input ID
GO-BP	19	GO:0032787	monocarboxylic acid metabolic process	-36	6.8	19	24156	651	370	68	18	2	18|36|124|189|226|229|241|335|344|345|1462|1548|1549|1551|1559|1577|1579|1581|1593|1962|2023|2026|2203|2806|3029|3091|3099|3939|4051|4594|5066|5106|5209|5210|5214|5230|5264|5313|5315|5444|5446|6319|6718|7915|7923|8309|8529|8564|8824|8875|9104|10841|10998|11000|11001|23498|51084|51085|54541|54988|55268|55526|55753|59342|84649|123876|285440|348158	ABAT|ACADSB|ADH1A|AGXT|ALDOA|ALDOB|ALOX5AP|APOA1|APOC2|APOC3|VCAN|CYP2A6|CYP2A7|CYP3A7|CYP2C9|CYP3A5|CYP4A11|CYP7A1|CYP27A1|EHHADH|ENO1|ENO2|FBP1|GOT2|HAGH|HIF1A|HK2|LDHA|CYP4F3|MMUT|PAM|PCK2|PFKFB3|PFKFB4|PFKP|PGK1|PHYH|PKLR|PKM|PON1|PON3|SCD|AKR1D1|ALDH5A1|HSD17B8|ACOX2|CYP4F2|KMO|CES2|VNN2|RGN|FTCD|SLC27A5|SLC27A3|SLC27A2|HAAO|CRYL1|MLXIPL|DDIT4|ACSM5|ECHDC2|DHTKD1|OGDHL|SCPEP1|DGAT2|ACSM2A|CY…	-32	Input ID
GO-BP	19	GO:0044282	small molecule catabolic process	-31	7.8	18	24156	445	370	53	14	1.8	18|36|189|226|229|383|586|622|960|1579|1581|1593|1610|1807|1962|2023|2026|2806|3029|3081|3099|3242|3795|4051|4143|4594|5106|5214|5230|5264|5313|5315|5444|5446|6718|6898|7263|7915|8309|8529|8564|10841|11001|23498|23670|27165|51084|51268|51733|55268|80896|132158|137872	ABAT|ACADSB|AGXT|ALDOA|ALDOB|ARG1|BCAT1|BDH1|CD44|CYP4A11|CYP7A1|CYP27A1|DAO|DPYS|EHHADH|ENO1|ENO2|GOT2|HAGH|HGD|HK2|HPD|KHK|CYP4F3|MAT1A|MMUT|PCK2|PFKP|PGK1|PHYH|PKLR|PKM|PON1|PON3|AKR1D1|TAT|TST|ALDH5A1|ACOX2|CYP4F2|KMO|FTCD|SLC27A2|HAAO|CEMIP2|GLS2|CRYL1|PIPOX|UPB1|ECHDC2|NPL|GLYCTK|ADHFE1	-27	Input ID
GO-BP	19	GO:0046394	carboxylic acid biosynthetic process	-26	6.9	16	24156	462	370	49	13	1.8	18|189|226|229|241|335|344|345|586|635|1373|1462|1559|1579|1581|1593|2023|2026|2203|2593|2806|3091|3099|3939|5209|5210|5214|5230|5313|5315|5352|6319|6718|7923|8309|8564|9104|10998|11001|23498|27165|51085|51733|54541|54988|55526|55753|123876|348158	ABAT|AGXT|ALDOA|ALDOB|ALOX5AP|APOA1|APOC2|APOC3|BCAT1|BHMT|CPS1|VCAN|CYP2C9|CYP4A11|CYP7A1|CYP27A1|ENO1|ENO2|FBP1|GAMT|GOT2|HIF1A|HK2|LDHA|PFKFB3|PFKFB4|PFKP|PGK1|PKLR|PKM|PLOD2|SCD|AKR1D1|HSD17B8|ACOX2|KMO|RGN|SLC27A5|SLC27A2|HAAO|GLS2|MLXIPL|UPB1|DDIT4|ACSM5|DHTKD1|OGDHL|ACSM2A|ACSM2B	-22	Input ID
GO-BP	19	GO:0016053	organic acid biosynthetic process	-26	6.9	16	24156	463	370	49	13	1.8	18|189|226|229|241|335|344|345|586|635|1373|1462|1559|1579|1581|1593|2023|2026|2203|2593|2806|3091|3099|3939|5209|5210|5214|5230|5313|5315|5352|6319|6718|7923|8309|8564|9104|10998|11001|23498|27165|51085|51733|54541|54988|55526|55753|123876|348158	ABAT|AGXT|ALDOA|ALDOB|ALOX5AP|APOA1|APOC2|APOC3|BCAT1|BHMT|CPS1|VCAN|CYP2C9|CYP4A11|CYP7A1|CYP27A1|ENO1|ENO2|FBP1|GAMT|GOT2|HIF1A|HK2|LDHA|PFKFB3|PFKFB4|PFKP|PGK1|PKLR|PKM|PLOD2|SCD|AKR1D1|HSD17B8|ACOX2|KMO|RGN|SLC27A5|SLC27A2|HAAO|GLS2|MLXIPL|UPB1|DDIT4|ACSM5|DHTKD1|OGDHL|ACSM2A|ACSM2B	-22	Input ID
GO-BP	19	GO:0051186	cofactor metabolic process	-25	5.8	15	24156	609	370	54	15	1.8	226|229|635|847|2023|2026|2203|2539|2806|3029|3091|3099|3158|3162|3263|3939|4143|4363|4594|5209|5210|5214|5230|5264|5313|5315|5538|6319|6513|6515|6898|7086|7915|7923|8529|8564|8875|9104|10400|10841|23498|27232|51085|51268|53354|54541|54988|55526|55753|84649|123876|137872|171425|348158	ALDOA|ALDOB|BHMT|CAT|ENO1|ENO2|FBP1|G6PD|GOT2|HAGH|HIF1A|HK2|HMGCS2|HMOX1|HPX|LDHA|MAT1A|ABCC1|MMUT|PFKFB3|PFKFB4|PFKP|PGK1|PHYH|PKLR|PKM|PPT1|SCD|SLC2A1|SLC2A3|TAT|TKT|ALDH5A1|HSD17B8|CYP4F2|KMO|VNN2|RGN|PEMT|FTCD|HAAO|GNMT|MLXIPL|PIPOX|PANK1|DDIT4|ACSM5|DHTKD1|OGDHL|DGAT2|ACSM2A|ADHFE1|CLYBL|ACSM2B	-21	Input ID
GO-BP	19	GO:0072330	monocarboxylic acid biosynthetic process	-23	7.7	15	24156	341	370	40	11	1.6	18|189|226|229|241|335|344|345|1462|1559|1579|1581|1593|2023|2026|2203|3091|3099|3939|5209|5210|5214|5230|5313|5315|6319|6718|7923|8309|8564|9104|10998|11001|51085|54541|54988|55526|55753|123876|348158	ABAT|AGXT|ALDOA|ALDOB|ALOX5AP|APOA1|APOC2|APOC3|VCAN|CYP2C9|CYP4A11|CYP7A1|CYP27A1|ENO1|ENO2|FBP1|HIF1A|HK2|LDHA|PFKFB3|PFKFB4|PFKP|PGK1|PKLR|PKM|SCD|AKR1D1|HSD17B8|ACOX2|KMO|RGN|SLC27A5|SLC27A2|MLXIPL|DDIT4|ACSM5|DHTKD1|OGDHL|ACSM2A|ACSM2B	-19	Input ID
GO-BP	19	GO:0046395	carboxylic acid catabolic process	-22	8.6	16	24156	274	370	36	9.7	1.5	18|36|189|383|586|960|1579|1610|1962|2806|3081|3242|4051|4143|4594|5106|5264|5444|5446|6718|6898|7263|7915|8309|8529|8564|10841|11001|23498|23670|27165|51084|51268|55268|80896|137872	ABAT|ACADSB|AGXT|ARG1|BCAT1|CD44|CYP4A11|DAO|EHHADH|GOT2|HGD|HPD|CYP4F3|MAT1A|MMUT|PCK2|PHYH|PON1|PON3|AKR1D1|TAT|TST|ALDH5A1|ACOX2|CYP4F2|KMO|FTCD|SLC27A2|HAAO|CEMIP2|GLS2|CRYL1|PIPOX|ECHDC2|NPL|ADHFE1	-19	Input ID
GO-BP	19	GO:0016054	organic acid catabolic process	-22	8.6	16	24156	274	370	36	9.7	1.5	18|36|189|383|586|960|1579|1610|1962|2806|3081|3242|4051|4143|4594|5106|5264|5444|5446|6718|6898|7263|7915|8309|8529|8564|10841|11001|23498|23670|27165|51084|51268|55268|80896|137872	ABAT|ACADSB|AGXT|ARG1|BCAT1|CD44|CYP4A11|DAO|EHHADH|GOT2|HGD|HPD|CYP4F3|MAT1A|MMUT|PCK2|PHYH|PON1|PON3|AKR1D1|TAT|TST|ALDH5A1|ACOX2|CYP4F2|KMO|FTCD|SLC27A2|HAAO|CEMIP2|GLS2|CRYL1|PIPOX|ECHDC2|NPL|ADHFE1	-19	Input ID
GO-BP	19	GO:0006732	coenzyme metabolic process	-22	6.7	15	24156	407	370	42	11	1.6	226|229|635|2023|2026|2203|2539|3091|3099|3158|3939|4143|5209|5210|5214|5230|5313|5315|5538|6319|6513|6515|7086|7923|8529|8564|8875|9104|10400|10841|23498|27232|51085|51268|53354|54541|54988|55526|55753|84649|123876|348158	ALDOA|ALDOB|BHMT|ENO1|ENO2|FBP1|G6PD|HIF1A|HK2|HMGCS2|LDHA|MAT1A|PFKFB3|PFKFB4|PFKP|PGK1|PKLR|PKM|PPT1|SCD|SLC2A1|SLC2A3|TKT|HSD17B8|CYP4F2|KMO|VNN2|RGN|PEMT|FTCD|HAAO|GNMT|MLXIPL|PIPOX|PANK1|DDIT4|ACSM5|DHTKD1|OGDHL|DGAT2|ACSM2A|ACSM2B	-19	Input ID
GO-BP	19	GO:0009611	response to wounding	-18	4.6	12	24156	691	370	49	13	1.8	18|133|308|335|383|462|960|1192|1361|1839|2155|2158|2160|2161|2165|2207|3091|3162|3273|3491|3673|3725|3818|3827|3956|4015|4321|4851|5054|5104|5270|5315|5329|5340|5345|5624|5738|6279|6696|7104|7128|7305|7538|7852|8529|8858|9314|23764|51156	ABAT|ADM|ANXA5|APOA1|ARG1|SERPINC1|CD44|CLIC1|CPB2|HBEGF|F7|F9|F11|F12|F13B|FCER1G|HIF1A|HMOX1|HRG|CCN1|ITGA2|JUN|KLKB1|KNG1|LGALS1|LOX|MMP12|NOTCH1|SERPINE1|SERPINA5|SERPINE2|PKM|PLAUR|PLG|SERPINF2|PROC|PTGFRN|S100A8|SPP1|TM4SF4|TNFAIP3|TYROBP|ZFP36|CXCR4|CYP4F2|PROZ|KLF4|MAFF|SERPINA10	-15	Input ID
GO-BP	19	GO:0006631	fatty acid metabolic process	-17	6.1	13	24156	383	370	36	9.7	1.5	36|241|335|344|345|1548|1549|1559|1579|1581|1962|4051|4594|5066|5106|5264|5444|5446|6319|7915|7923|8309|8529|8824|9104|10998|11000|11001|51084|51085|54988|55268|84649|123876|285440|348158	ACADSB|ALOX5AP|APOA1|APOC2|APOC3|CYP2A6|CYP2A7|CYP2C9|CYP4A11|CYP7A1|EHHADH|CYP4F3|MMUT|PAM|PCK2|PHYH|PON1|PON3|SCD|ALDH5A1|HSD17B8|ACOX2|CYP4F2|CES2|RGN|SLC27A5|SLC27A3|SLC27A2|CRYL1|MLXIPL|ACSM5|ECHDC2|DGAT2|ACSM2A|CYP4V2|ACSM2B	-14	Input ID
GO-BP	19	GO:1901605	alpha-amino acid metabolic process	-17	8.3	14	24156	221	370	28	7.6	1.4	189|383|586|635|1373|1610|2593|2806|3081|3242|4143|4594|5352|6535|6898|7263|7915|8564|9056|10400|10841|23498|27165|27232|30001|51268|112399|137872	AGXT|ARG1|BCAT1|BHMT|CPS1|DAO|GAMT|GOT2|HGD|HPD|MAT1A|MMUT|PLOD2|SLC6A8|TAT|TST|ALDH5A1|KMO|SLC7A7|PEMT|FTCD|HAAO|GLS2|GNMT|ERO1A|PIPOX|EGLN3|ADHFE1	-14	Input ID
GO-BP	19	GO:0006520	cellular amino acid metabolic process	-16	6	12	24156	357	370	33	8.9	1.5	18|36|189|383|586|635|670|1373|1610|1807|2593|2806|3081|3242|4143|4594|5352|6535|6898|7263|7915|8564|9056|10400|10841|23498|27165|27232|30001|51268|51733|112399|137872	ABAT|ACADSB|AGXT|ARG1|BCAT1|BHMT|BPHL|CPS1|DAO|DPYS|GAMT|GOT2|HGD|HPD|MAT1A|MMUT|PLOD2|SLC6A8|TAT|TST|ALDH5A1|KMO|SLC7A7|PEMT|FTCD|HAAO|GLS2|GNMT|ERO1A|PIPOX|UPB1|EGLN3|ADHFE1	-13	Input ID
GO-BP	19	GO:0005975	carbohydrate metabolic process	-16	4.5	11	24156	629	370	43	12	1.7	226|229|467|2023|2026|2203|2538|2539|2806|2822|2998|3091|3099|3486|3795|3939|5106|5209|5210|5214|5230|5313|5315|5502|5950|6513|6514|6515|7086|7915|9104|9245|27232|51084|51085|54541|55526|55753|80168|80896|84002|84649|132158	ALDOA|ALDOB|ATF3|ENO1|ENO2|FBP1|G6PC|G6PD|GOT2|GPLD1|GYS2|HIF1A|HK2|IGFBP3|KHK|LDHA|PCK2|PFKFB3|PFKFB4|PFKP|PGK1|PKLR|PKM|PPP1R1A|RBP4|SLC2A1|SLC2A2|SLC2A3|TKT|ALDH5A1|RGN|GCNT3|GNMT|CRYL1|MLXIPL|DDIT4|DHTKD1|OGDHL|MOGAT2|NPL|B3GNT5|DGAT2|GLYCTK	-13	Input ID
GO-BP	19	GO:0005996	monosaccharide metabolic process	-16	6.6	12	24156	295	370	30	8.1	1.4	226|229|467|2023|2026|2203|2538|2539|2806|2822|3099|3486|3795|5106|5209|5210|5214|5230|5313|5315|5950|6513|6515|7086|7915|9104|27232|51084|84649|132158	ALDOA|ALDOB|ATF3|ENO1|ENO2|FBP1|G6PC|G6PD|GOT2|GPLD1|HK2|IGFBP3|KHK|PCK2|PFKFB3|PFKFB4|PFKP|PGK1|PKLR|PKM|RBP4|SLC2A1|SLC2A3|TKT|ALDH5A1|RGN|GNMT|CRYL1|DGAT2|GLYCTK	-13	Input ID
GO-BP	19	GO:0042060	wound healing	-15	4.5	11	24156	576	370	40	11	1.6	18|308|462|960|1192|1361|1839|2155|2158|2160|2161|2165|2207|3091|3162|3273|3491|3673|3818|3827|4015|4321|4851|5054|5104|5270|5315|5329|5340|5345|5624|5738|6279|7104|7128|7852|8529|8858|23764|51156	ABAT|ANXA5|SERPINC1|CD44|CLIC1|CPB2|HBEGF|F7|F9|F11|F12|F13B|FCER1G|HIF1A|HMOX1|HRG|CCN1|ITGA2|KLKB1|KNG1|LOX|MMP12|NOTCH1|SERPINE1|SERPINA5|SERPINE2|PKM|PLAUR|PLG|SERPINF2|PROC|PTGFRN|S100A8|TM4SF4|TNFAIP3|CXCR4|CYP4F2|PROZ|MAFF|SERPINA10	-12	Input ID
GO-BP	19	GO:0045055	regulated exocytosis	-15	3.9	10	24156	796	370	47	13	1.7	1|226|302|308|335|383|427|728|847|960|1075|1476|1992|2207|3162|3273|3685|3699|3827|4069|4318|4851|4973|5054|5217|5267|5315|5329|5340|5345|5552|5768|6279|6280|6282|6515|6694|7097|7114|7276|7305|10184|10576|11001|11031|25797|79888	A1BG|ALDOA|ANXA2|ANXA5|APOA1|ARG1|ASAH1|C5AR1|CAT|CD44|CTSC|CSTB|SERPINB1|FCER1G|HMOX1|HRG|ITGAV|ITIH3|KNG1|LYZ|MMP9|NOTCH1|OLR1|SERPINE1|PFN2|SERPINA4|PKM|PLAUR|PLG|SERPINF2|SRGN|QSOX1|S100A8|S100A9|S100A11|SLC2A3|SPP2|TLR2|TMSB4X|TTR|TYROBP|LHFPL2|CCT2|SLC27A2|RAB31|QPCT|LPCAT1	-12	Input ID
GO-BP	19	GO:0015711	organic anion transport	-14	4.8	11	24156	487	370	36	9.7	1.5	18|123|189|335|344|345|383|768|1579|2538|2806|4363|5244|5360|5997|6510|6513|6514|6529|6535|6554|6567|8529|8564|9056|10166|10864|10991|10998|11000|11001|11309|27165|27347|81539|84647	ABAT|PLIN2|AGXT|APOA1|APOC2|APOC3|ARG1|CA9|CYP4A11|G6PC|GOT2|ABCC1|ABCB4|PLTP|RGS2|SLC1A5|SLC2A1|SLC2A2|SLC6A1|SLC6A8|SLC10A1|SLC16A2|CYP4F2|KMO|SLC7A7|SLC25A15|SLC22A7|SLC38A3|SLC27A5|SLC27A3|SLC27A2|SLCO2B1|GLS2|STK39|SLC38A1|PLA2G12B	-11	Input ID
GO-BP	19	GO:0001666	response to hypoxia	-14	5.7	11	24156	358	370	31	8.4	1.4	18|133|283|665|768|847|2023|2155|3091|3099|3162|3383|3673|3939|4851|5066|5230|5313|5315|5352|6513|6781|7097|7852|9520|10397|29923|30001|54541|112399|100133941	ABAT|ADM|ANG|BNIP3L|CA9|CAT|ENO1|F7|HIF1A|HK2|HMOX1|ICAM1|ITGA2|LDHA|NOTCH1|PAM|PGK1|PKLR|PKM|PLOD2|SLC2A1|STC1|TLR2|CXCR4|NPEPPS|NDRG1|HILPDA|ERO1A|DDIT4|EGLN3|CD24	-11	Input ID
GO-BP	19	GO:0006820	anion transport	-14	4.2	10	24156	637	370	41	11	1.6	18|123|189|335|344|345|383|768|1192|1579|2538|2806|4363|5244|5360|5621|5997|6510|6513|6514|6529|6535|6554|6567|6781|8529|8564|9056|10050|10166|10864|10991|10998|11000|11001|11309|27165|27347|55107|81539|84647	ABAT|PLIN2|AGXT|APOA1|APOC2|APOC3|ARG1|CA9|CLIC1|CYP4A11|G6PC|GOT2|ABCC1|ABCB4|PLTP|PRNP|RGS2|SLC1A5|SLC2A1|SLC2A2|SLC6A1|SLC6A8|SLC10A1|SLC16A2|STC1|CYP4F2|KMO|SLC7A7|SLC17A4|SLC25A15|SLC22A7|SLC38A3|SLC27A5|SLC27A3|SLC27A2|SLCO2B1|GLS2|STK39|ANO1|SLC38A1|PLA2G12B	-11	Input ID
GO-BP	19	GO:0036293	response to decreased oxygen levels	-14	5.5	11	24156	370	370	31	8.4	1.4	18|133|283|665|768|847|2023|2155|3091|3099|3162|3383|3673|3939|4851|5066|5230|5313|5315|5352|6513|6781|7097|7852|9520|10397|29923|30001|54541|112399|100133941	ABAT|ADM|ANG|BNIP3L|CA9|CAT|ENO1|F7|HIF1A|HK2|HMOX1|ICAM1|ITGA2|LDHA|NOTCH1|PAM|PGK1|PKLR|PKM|PLOD2|SLC2A1|STC1|TLR2|CXCR4|NPEPPS|NDRG1|HILPDA|ERO1A|DDIT4|EGLN3|CD24	-11	Input ID
GO-BP	19	GO:0019318	hexose metabolic process	-14	6.7	11	24156	253	370	26	7	1.3	226|229|467|2023|2026|2203|2538|2539|2806|2822|3099|3486|3795|5106|5209|5210|5214|5230|5313|5315|5950|7915|9104|27232|84649|132158	ALDOA|ALDOB|ATF3|ENO1|ENO2|FBP1|G6PC|G6PD|GOT2|GPLD1|HK2|IGFBP3|KHK|PCK2|PFKFB3|PFKFB4|PFKP|PGK1|PKLR|PKM|RBP4|ALDH5A1|RGN|GNMT|DGAT2|GLYCTK	-11	Input ID
GO-BP	19	GO:0050878	regulation of body fluid levels	-14	4.6	10	24156	507	370	36	9.7	1.5	18|133|302|308|462|1192|1361|1579|2155|2158|2160|2161|2165|2207|2806|3091|3099|3273|3673|3818|3827|5054|5066|5104|5270|5329|5340|5345|5624|7498|8529|8858|23764|27347|51156|65267	ABAT|ADM|ANXA2|ANXA5|SERPINC1|CLIC1|CPB2|CYP4A11|F7|F9|F11|F12|F13B|FCER1G|GOT2|HIF1A|HK2|HRG|ITGA2|KLKB1|KNG1|SERPINE1|PAM|SERPINA5|SERPINE2|PLAUR|PLG|SERPINF2|PROC|XDH|CYP4F2|PROZ|MAFF|STK39|SERPINA10|WNK3	-11	Input ID
GO-BP	19	GO:0042866	pyruvate biosynthetic process	-14	10	13	24156	119	370	19	5.1	1.1	189|226|229|2023|2026|2203|3091|3099|3939|5209|5210|5214|5230|5313|5315|51085|54541|55526|55753	AGXT|ALDOA|ALDOB|ENO1|ENO2|FBP1|HIF1A|HK2|LDHA|PFKFB3|PFKFB4|PFKP|PGK1|PKLR|PKM|MLXIPL|DDIT4|DHTKD1|OGDHL	-11	Input ID
GO-BP	19	GO:0006090	pyruvate metabolic process	-13	8.8	12	24156	155	370	21	5.7	1.2	189|226|229|2023|2026|2203|3029|3091|3099|3939|5106|5209|5210|5214|5230|5313|5315|51085|54541|55526|55753	AGXT|ALDOA|ALDOB|ENO1|ENO2|FBP1|HAGH|HIF1A|HK2|LDHA|PCK2|PFKFB3|PFKFB4|PFKP|PGK1|PKLR|PKM|MLXIPL|DDIT4|DHTKD1|OGDHL	-11	Input ID
GO-BP	19	GO:0030193	regulation of blood coagulation	-13	14	14	24156	77	370	16	4.3	1.1	18|462|1361|2155|2160|2161|2207|3273|3818|3827|5054|5270|5329|5340|5345|5624	ABAT|SERPINC1|CPB2|F7|F11|F12|FCER1G|HRG|KLKB1|KNG1|SERPINE1|SERPINE2|PLAUR|PLG|SERPINF2|PROC	-11	Input ID
GO-BP	19	GO:0009108	coenzyme biosynthetic process	-13	6.5	11	24156	260	370	26	7	1.3	226|229|2023|2026|2203|3091|3099|3939|4143|5209|5210|5214|5230|5313|5315|5538|6319|7923|8564|9104|23498|51085|53354|54541|55526|55753	ALDOA|ALDOB|ENO1|ENO2|FBP1|HIF1A|HK2|LDHA|MAT1A|PFKFB3|PFKFB4|PFKP|PGK1|PKLR|PKM|PPT1|SCD|HSD17B8|KMO|RGN|HAAO|MLXIPL|PANK1|DDIT4|DHTKD1|OGDHL	-11	Input ID
GO-BP	19	GO:1900046	regulation of hemostasis	-13	13	14	24156	78	370	16	4.3	1.1	18|462|1361|2155|2160|2161|2207|3273|3818|3827|5054|5270|5329|5340|5345|5624	ABAT|SERPINC1|CPB2|F7|F11|F12|FCER1G|HRG|KLKB1|KNG1|SERPINE1|SERPINE2|PLAUR|PLG|SERPINF2|PROC	-11	Input ID
GO-BP	19	GO:0009063	cellular amino acid catabolic process	-13	9.9	12	24156	125	370	19	5.1	1.1	18|36|189|383|586|1610|2806|3081|3242|4143|6898|7263|7915|8564|10841|23498|27165|51268|137872	ABAT|ACADSB|AGXT|ARG1|BCAT1|DAO|GOT2|HGD|HPD|MAT1A|TAT|TST|ALDH5A1|KMO|FTCD|HAAO|GLS2|PIPOX|ADHFE1	-10	Input ID
GO-BP	19	GO:0070482	response to oxygen levels	-13	5.1	10	24156	394	370	31	8.4	1.4	18|133|283|665|768|847|2023|2155|3091|3099|3162|3383|3673|3939|4851|5066|5230|5313|5315|5352|6513|6781|7097|7852|9520|10397|29923|30001|54541|112399|100133941	ABAT|ADM|ANG|BNIP3L|CA9|CAT|ENO1|F7|HIF1A|HK2|HMOX1|ICAM1|ITGA2|LDHA|NOTCH1|PAM|PGK1|PKLR|PKM|PLOD2|SLC2A1|STC1|TLR2|CXCR4|NPEPPS|NDRG1|HILPDA|ERO1A|DDIT4|EGLN3|CD24	-10	Input ID
GO-BP	19	GO:0050818	regulation of coagulation	-13	13	13	24156	82	370	16	4.3	1.1	18|462|1361|2155|2160|2161|2207|3273|3818|3827|5054|5270|5329|5340|5345|5624	ABAT|SERPINC1|CPB2|F7|F11|F12|FCER1G|HRG|KLKB1|KNG1|SERPINE1|SERPINE2|PLAUR|PLG|SERPINF2|PROC	-10	Input ID
GO-BP	19	GO:0002274	myeloid leukocyte activation	-13	4	9.7	24156	656	370	40	11	1.6	1|226|302|383|427|728|847|960|1075|1476|1776|1992|2207|3162|3685|3725|4069|4318|4973|5315|5329|5768|6279|6280|6282|6372|6515|7097|7107|7276|7305|8754|10397|10576|11001|11031|11326|25797|79888|84868	A1BG|ALDOA|ANXA2|ARG1|ASAH1|C5AR1|CAT|CD44|CTSC|CSTB|DNASE1L3|SERPINB1|FCER1G|HMOX1|ITGAV|JUN|LYZ|MMP9|OLR1|PKM|PLAUR|QSOX1|S100A8|S100A9|S100A11|CXCL6|SLC2A3|TLR2|GPR137B|TTR|TYROBP|ADAM9|NDRG1|CCT2|SLC27A2|RAB31|VSIG4|QPCT|LPCAT1|HAVCR2	-10	Input ID
GO-BP	19	GO:0019363	pyridine nucleotide biosynthetic process	-13	8.9	12	24156	147	370	20	5.4	1.2	226|229|2023|2026|2203|3091|3099|3939|5209|5210|5214|5230|5313|5315|8564|23498|51085|54541|55526|55753	ALDOA|ALDOB|ENO1|ENO2|FBP1|HIF1A|HK2|LDHA|PFKFB3|PFKFB4|PFKP|PGK1|PKLR|PKM|KMO|HAAO|MLXIPL|DDIT4|DHTKD1|OGDHL	-10	Input ID
GO-BP	19	GO:0019359	nicotinamide nucleotide biosynthetic process	-13	8.9	12	24156	147	370	20	5.4	1.2	226|229|2023|2026|2203|3091|3099|3939|5209|5210|5214|5230|5313|5315|8564|23498|51085|54541|55526|55753	ALDOA|ALDOB|ENO1|ENO2|FBP1|HIF1A|HK2|LDHA|PFKFB3|PFKFB4|PFKP|PGK1|PKLR|PKM|KMO|HAAO|MLXIPL|DDIT4|DHTKD1|OGDHL	-10	Input ID
GO-BP	19	GO:0006096	glycolytic process	-13	10	12	24156	115	370	18	4.9	1.1	226|229|2023|2026|2203|3091|3099|3939|5209|5210|5214|5230|5313|5315|51085|54541|55526|55753	ALDOA|ALDOB|ENO1|ENO2|FBP1|HIF1A|HK2|LDHA|PFKFB3|PFKFB4|PFKP|PGK1|PKLR|PKM|MLXIPL|DDIT4|DHTKD1|OGDHL	-10	Input ID
GO-BP	19	GO:0072525	pyridine-containing compound biosynthetic process	-13	8.7	12	24156	150	370	20	5.4	1.2	226|229|2023|2026|2203|3091|3099|3939|5209|5210|5214|5230|5313|5315|8564|23498|51085|54541|55526|55753	ALDOA|ALDOB|ENO1|ENO2|FBP1|HIF1A|HK2|LDHA|PFKFB3|PFKFB4|PFKP|PGK1|PKLR|PKM|KMO|HAAO|MLXIPL|DDIT4|DHTKD1|OGDHL	-10	Input ID
GO-BP	19	GO:0006757	ATP generation from ADP	-13	10	12	24156	116	370	18	4.9	1.1	226|229|2023|2026|2203|3091|3099|3939|5209|5210|5214|5230|5313|5315|51085|54541|55526|55753	ALDOA|ALDOB|ENO1|ENO2|FBP1|HIF1A|HK2|LDHA|PFKFB3|PFKFB4|PFKP|PGK1|PKLR|PKM|MLXIPL|DDIT4|DHTKD1|OGDHL	-10	Input ID
GO-BP	19	GO:0046496	nicotinamide nucleotide metabolic process	-13	7.5	11	24156	192	370	22	5.9	1.2	226|229|2023|2026|2203|2539|3091|3099|3939|5209|5210|5214|5230|5313|5315|7086|8564|23498|51085|54541|55526|55753	ALDOA|ALDOB|ENO1|ENO2|FBP1|G6PD|HIF1A|HK2|LDHA|PFKFB3|PFKFB4|PFKP|PGK1|PKLR|PKM|TKT|KMO|HAAO|MLXIPL|DDIT4|DHTKD1|OGDHL	-9.9	Input ID
GO-BP	19	GO:0019362	pyridine nucleotide metabolic process	-13	7.5	11	24156	192	370	22	5.9	1.2	226|229|2023|2026|2203|2539|3091|3099|3939|5209|5210|5214|5230|5313|5315|7086|8564|23498|51085|54541|55526|55753	ALDOA|ALDOB|ENO1|ENO2|FBP1|G6PD|HIF1A|HK2|LDHA|PFKFB3|PFKFB4|PFKP|PGK1|PKLR|PKM|TKT|KMO|HAAO|MLXIPL|DDIT4|DHTKD1|OGDHL	-9.9	Input ID
GO-BP	19	GO:0006006	glucose metabolic process	-13	7	11	24156	213	370	23	6.2	1.3	226|229|467|2023|2026|2203|2538|2539|2806|2822|3099|3486|3795|5106|5214|5230|5313|5315|5950|7915|9104|27232|84649	ALDOA|ALDOB|ATF3|ENO1|ENO2|FBP1|G6PC|G6PD|GOT2|GPLD1|HK2|IGFBP3|KHK|PCK2|PFKP|PGK1|PKLR|PKM|RBP4|ALDH5A1|RGN|GNMT|DGAT2	-9.9	Input ID
GO-BP	19	GO:0006091	generation of precursor metabolites and energy	-13	4.4	9.7	24156	522	370	35	9.5	1.5	124|226|229|622|847|2023|2026|2203|2538|2998|3091|3099|3158|3795|3939|5209|5210|5214|5230|5313|5315|5502|7498|7915|8608|10998|23498|27232|29958|51085|54541|55022|55526|55753|56901	ADH1A|ALDOA|ALDOB|BDH1|CAT|ENO1|ENO2|FBP1|G6PC|GYS2|HIF1A|HK2|HMGCS2|KHK|LDHA|PFKFB3|PFKFB4|PFKP|PGK1|PKLR|PKM|PPP1R1A|XDH|ALDH5A1|RDH16|SLC27A5|HAAO|GNMT|DMGDH|MLXIPL|DDIT4|PID1|DHTKD1|OGDHL|NDUFA4L2	-9.9	Input ID
GO-BP	19	GO:0030195	negative regulation of blood coagulation	-12	17	14	24156	49	370	13	3.5	0.96	18|1361|2160|2161|3273|3818|3827|5054|5270|5329|5340|5345|5624	ABAT|CPB2|F11|F12|HRG|KLKB1|KNG1|SERPINE1|SERPINE2|PLAUR|PLG|SERPINF2|PROC	-9.8	Input ID
GO-BP	19	GO:1900047	negative regulation of hemostasis	-12	17	14	24156	50	370	13	3.5	0.96	18|1361|2160|2161|3273|3818|3827|5054|5270|5329|5340|5345|5624	ABAT|CPB2|F11|F12|HRG|KLKB1|KNG1|SERPINE1|SERPINE2|PLAUR|PLG|SERPINF2|PROC	-9.7	Input ID
GO-BP	19	GO:0072524	pyridine-containing compound metabolic process	-12	7.2	11	24156	199	370	22	5.9	1.2	226|229|2023|2026|2203|2539|3091|3099|3939|5209|5210|5214|5230|5313|5315|7086|8564|23498|51085|54541|55526|55753	ALDOA|ALDOB|ENO1|ENO2|FBP1|G6PD|HIF1A|HK2|LDHA|PFKFB3|PFKFB4|PFKP|PGK1|PKLR|PKM|TKT|KMO|HAAO|MLXIPL|DDIT4|DHTKD1|OGDHL	-9.7	Input ID
GO-BP	19	GO:0016052	carbohydrate catabolic process	-12	7.2	11	24156	200	370	22	5.9	1.2	226|229|2023|2026|2203|2538|3091|3099|3795|3939|5209|5210|5214|5230|5313|5315|51084|51085|54541|55526|55753|132158	ALDOA|ALDOB|ENO1|ENO2|FBP1|G6PC|HIF1A|HK2|KHK|LDHA|PFKFB3|PFKFB4|PFKP|PGK1|PKLR|PKM|CRYL1|MLXIPL|DDIT4|DHTKD1|OGDHL|GLYCTK	-9.6	Input ID
GO-BP	19	GO:0006754	ATP biosynthetic process	-12	8.2	11	24156	160	370	20	5.4	1.2	226|229|2023|2026|2203|3091|3099|3939|5209|5210|5214|5230|5313|5315|7114|51085|54541|55022|55526|55753	ALDOA|ALDOB|ENO1|ENO2|FBP1|HIF1A|HK2|LDHA|PFKFB3|PFKFB4|PFKP|PGK1|PKLR|PKM|TMSB4X|MLXIPL|DDIT4|PID1|DHTKD1|OGDHL	-9.6	Input ID
GO-BP	19	GO:0050819	negative regulation of coagulation	-12	16	14	24156	53	370	13	3.5	0.96	18|1361|2160|2161|3273|3818|3827|5054|5270|5329|5340|5345|5624	ABAT|CPB2|F11|F12|HRG|KLKB1|KNG1|SERPINE1|SERPINE2|PLAUR|PLG|SERPINF2|PROC	-9.4	Input ID
GO-BP	19	GO:0046031	ADP metabolic process	-12	9.3	12	24156	127	370	18	4.9	1.1	226|229|2023|2026|2203|3091|3099|3939|5209|5210|5214|5230|5313|5315|51085|54541|55526|55753	ALDOA|ALDOB|ENO1|ENO2|FBP1|HIF1A|HK2|LDHA|PFKFB3|PFKFB4|PFKP|PGK1|PKLR|PKM|MLXIPL|DDIT4|DHTKD1|OGDHL	-9.4	Input ID
GO-BP	19	GO:0051188	cofactor biosynthetic process	-12	5.4	10	24156	324	370	27	7.3	1.4	226|229|2023|2026|2203|3029|3091|3099|3939|4143|5209|5210|5214|5230|5313|5315|5538|6319|7923|8564|9104|23498|51085|53354|54541|55526|55753	ALDOA|ALDOB|ENO1|ENO2|FBP1|HAGH|HIF1A|HK2|LDHA|MAT1A|PFKFB3|PFKFB4|PFKP|PGK1|PKLR|PKM|PPT1|SCD|HSD17B8|KMO|RGN|HAAO|MLXIPL|PANK1|DDIT4|DHTKD1|OGDHL	-9.4	Input ID
GO-BP	19	GO:1901615	organic hydroxy compound metabolic process	-12	4.2	9.4	24156	548	370	35	9.5	1.5	18|124|335|427|847|1551|1559|1577|1579|1581|1593|1610|2539|3029|3091|3158|3939|4051|5106|5360|5444|5950|6319|6567|6718|7108|7276|8309|8529|8608|10998|11001|80168|84649|285440	ABAT|ADH1A|APOA1|ASAH1|CAT|CYP3A7|CYP2C9|CYP3A5|CYP4A11|CYP7A1|CYP27A1|DAO|G6PD|HAGH|HIF1A|HMGCS2|LDHA|CYP4F3|PCK2|PLTP|PON1|RBP4|SCD|SLC16A2|AKR1D1|TM7SF2|TTR|ACOX2|CYP4F2|RDH16|SLC27A5|SLC27A2|MOGAT2|DGAT2|CYP4V2	-9.4	Input ID
GO-BP	19	GO:1903034	regulation of response to wounding	-12	7.4	11	24156	186	370	21	5.7	1.2	18|462|1361|1839|2155|2160|2161|2207|3273|3818|3827|5054|5270|5329|5340|5345|5624|6696|7128|7852|9314	ABAT|SERPINC1|CPB2|HBEGF|F7|F11|F12|FCER1G|HRG|KLKB1|KNG1|SERPINE1|SERPINE2|PLAUR|PLG|SERPINF2|PROC|SPP1|TNFAIP3|CXCR4|KLF4	-9.4	Input ID
GO-BP	19	GO:0010951	negative regulation of endopeptidase activity	-12	6.2	10	24156	253	370	24	6.5	1.3	462|866|960|1476|1992|3273|3697|3698|3699|3827|4018|4318|5054|5104|5267|5270|5272|5329|5345|5621|6694|9314|26998|51156	SERPINC1|SERPINA6|CD44|CSTB|SERPINB1|HRG|ITIH1|ITIH2|ITIH3|KNG1|LPA|MMP9|SERPINE1|SERPINA5|SERPINA4|SERPINE2|SERPINB9|PLAUR|SERPINF2|PRNP|SPP2|KLF4|FETUB|SERPINA10	-9.3	Input ID
GO-BP	19	GO:0002444	myeloid leukocyte mediated immunity	-12	4.1	9.3	24156	555	370	35	9.5	1.5	1|226|302|383|427|728|847|960|1075|1476|1776|1992|2207|3162|3685|4069|4318|4973|5272|5315|5329|5768|6279|6280|6282|6372|6515|7097|7276|7305|10576|11001|11031|25797|79888	A1BG|ALDOA|ANXA2|ARG1|ASAH1|C5AR1|CAT|CD44|CTSC|CSTB|DNASE1L3|SERPINB1|FCER1G|HMOX1|ITGAV|LYZ|MMP9|OLR1|SERPINB9|PKM|PLAUR|QSOX1|S100A8|S100A9|S100A11|CXCL6|SLC2A3|TLR2|TTR|TYROBP|CCT2|SLC27A2|RAB31|QPCT|LPCAT1	-9.2	Input ID
GO-BP	19	GO:0006733	oxidoreduction coenzyme metabolic process	-12	6.8	11	24156	211	370	22	5.9	1.2	226|229|2023|2026|2203|2539|3091|3099|3939|5209|5210|5214|5230|5313|5315|7086|8564|23498|51085|54541|55526|55753	ALDOA|ALDOB|ENO1|ENO2|FBP1|G6PD|HIF1A|HK2|LDHA|PFKFB3|PFKFB4|PFKP|PGK1|PKLR|PKM|TKT|KMO|HAAO|MLXIPL|DDIT4|DHTKD1|OGDHL	-9.2	Input ID
GO-BP	19	GO:0008202	steroid metabolic process	-12	5.3	9.9	24156	332	370	27	7.3	1.4	133|335|427|847|866|1548|1551|1559|1577|1581|1593|2538|2539|3158|5444|6319|6696|6718|7108|7923|8309|8608|8856|10998|11001|84649|285440	ADM|APOA1|ASAH1|CAT|SERPINA6|CYP2A6|CYP3A7|CYP2C9|CYP3A5|CYP7A1|CYP27A1|G6PC|G6PD|HMGCS2|PON1|SCD|SPP1|AKR1D1|TM7SF2|HSD17B8|ACOX2|RDH16|NR1I2|SLC27A5|SLC27A2|DGAT2|CYP4V2	-9.2	Input ID
GO-BP	19	GO:0009206	purine ribonucleoside triphosphate biosynthetic process	-12	7.6	11	24156	171	370	20	5.4	1.2	226|229|2023|2026|2203|3091|3099|3939|5209|5210|5214|5230|5313|5315|7114|51085|54541|55022|55526|55753	ALDOA|ALDOB|ENO1|ENO2|FBP1|HIF1A|HK2|LDHA|PFKFB3|PFKFB4|PFKP|PGK1|PKLR|PKM|TMSB4X|MLXIPL|DDIT4|PID1|DHTKD1|OGDHL	-9.2	Input ID
GO-BP	19	GO:0015849	organic acid transport	-12	5.3	9.8	24156	334	370	27	7.3	1.4	18|123|189|383|1579|2806|4363|5244|5997|6510|6529|6535|6554|6567|8529|8564|9056|10166|10991|10998|11000|11001|11309|27165|27347|81539|84647	ABAT|PLIN2|AGXT|ARG1|CYP4A11|GOT2|ABCC1|ABCB4|RGS2|SLC1A5|SLC6A1|SLC6A8|SLC10A1|SLC16A2|CYP4F2|KMO|SLC7A7|SLC25A15|SLC38A3|SLC27A5|SLC27A3|SLC27A2|SLCO2B1|GLS2|STK39|SLC38A1|PLA2G12B	-9.1	Input ID
GO-BP	19	GO:0046942	carboxylic acid transport	-12	5.3	9.8	24156	334	370	27	7.3	1.4	18|123|189|383|1579|2806|4363|5244|5997|6510|6529|6535|6554|6567|8529|8564|9056|10166|10991|10998|11000|11001|11309|27165|27347|81539|84647	ABAT|PLIN2|AGXT|ARG1|CYP4A11|GOT2|ABCC1|ABCB4|RGS2|SLC1A5|SLC6A1|SLC6A8|SLC10A1|SLC16A2|CYP4F2|KMO|SLC7A7|SLC25A15|SLC38A3|SLC27A5|SLC27A3|SLC27A2|SLCO2B1|GLS2|STK39|SLC38A1|PLA2G12B	-9.1	Input ID
GO-BP	19	GO:0042119	neutrophil activation	-12	4.3	9.3	24156	501	370	33	8.9	1.5	1|226|302|383|427|728|847|960|1075|1476|1776|1992|2207|3685|4069|4318|4973|5315|5329|5768|6279|6280|6282|6372|6515|7097|7276|7305|10576|11001|11031|25797|79888	A1BG|ALDOA|ANXA2|ARG1|ASAH1|C5AR1|CAT|CD44|CTSC|CSTB|DNASE1L3|SERPINB1|FCER1G|ITGAV|LYZ|MMP9|OLR1|PKM|PLAUR|QSOX1|S100A8|S100A9|S100A11|CXCL6|SLC2A3|TLR2|TTR|TYROBP|CCT2|SLC27A2|RAB31|QPCT|LPCAT1	-9.1	Input ID
GO-BP	19	GO:0009145	purine nucleoside triphosphate biosynthetic process	-12	7.6	11	24156	172	370	20	5.4	1.2	226|229|2023|2026|2203|3091|3099|3939|5209|5210|5214|5230|5313|5315|7114|51085|54541|55022|55526|55753	ALDOA|ALDOB|ENO1|ENO2|FBP1|HIF1A|HK2|LDHA|PFKFB3|PFKFB4|PFKP|PGK1|PKLR|PKM|TMSB4X|MLXIPL|DDIT4|PID1|DHTKD1|OGDHL	-9.1	Input ID
GO-BP	19	GO:1901568	fatty acid derivative metabolic process	-12	7.6	11	24156	172	370	20	5.4	1.2	241|622|1548|1549|1559|1579|3158|4051|4363|5444|5446|5538|6319|7097|7923|8529|8824|10998|84649|123876	ALOX5AP|BDH1|CYP2A6|CYP2A7|CYP2C9|CYP4A11|HMGCS2|CYP4F3|ABCC1|PON1|PON3|PPT1|SCD|TLR2|HSD17B8|CYP4F2|CES2|SLC27A5|DGAT2|ACSM2A	-9.1	Input ID
GO-BP	19	GO:0002446	neutrophil mediated immunity	-12	4.3	9.3	24156	502	370	33	8.9	1.5	1|226|302|383|427|728|847|960|1075|1476|1776|1992|2207|3685|4069|4318|4973|5315|5329|5768|6279|6280|6282|6372|6515|7097|7276|7305|10576|11001|11031|25797|79888	A1BG|ALDOA|ANXA2|ARG1|ASAH1|C5AR1|CAT|CD44|CTSC|CSTB|DNASE1L3|SERPINB1|FCER1G|ITGAV|LYZ|MMP9|OLR1|PKM|PLAUR|QSOX1|S100A8|S100A9|S100A11|CXCL6|SLC2A3|TLR2|TTR|TYROBP|CCT2|SLC27A2|RAB31|QPCT|LPCAT1	-9.1	Input ID
GO-BP	19	GO:0006165	nucleoside diphosphate phosphorylation	-12	8.8	11	24156	134	370	18	4.9	1.1	226|229|2023|2026|2203|3091|3099|3939|5209|5210|5214|5230|5313|5315|51085|54541|55526|55753	ALDOA|ALDOB|ENO1|ENO2|FBP1|HIF1A|HK2|LDHA|PFKFB3|PFKFB4|PFKP|PGK1|PKLR|PKM|MLXIPL|DDIT4|DHTKD1|OGDHL	-9.1	Input ID
GO-BP	19	GO:0046364	monosaccharide biosynthetic process	-12	10	12	24156	100	370	16	4.3	1.1	226|229|467|2023|2026|2203|2538|2539|2806|5106|5230|5950|7086|9104|27232|84649	ALDOA|ALDOB|ATF3|ENO1|ENO2|FBP1|G6PC|G6PD|GOT2|PCK2|PGK1|RBP4|TKT|RGN|GNMT|DGAT2	-9.1	Input ID
GO-BP	19	GO:0061041	regulation of wound healing	-12	8.1	11	24156	154	370	19	5.1	1.1	18|462|1361|1839|2155|2160|2161|2207|3273|3818|3827|5054|5270|5329|5340|5345|5624|7128|7852	ABAT|SERPINC1|CPB2|HBEGF|F7|F11|F12|FCER1G|HRG|KLKB1|KNG1|SERPINE1|SERPINE2|PLAUR|PLG|SERPINF2|PROC|TNFAIP3|CXCR4	-9.1	Input ID
GO-BP	19	GO:0036230	granulocyte activation	-11	4.2	9.2	24156	507	370	33	8.9	1.5	1|226|302|383|427|728|847|960|1075|1476|1776|1992|2207|3685|4069|4318|4973|5315|5329|5768|6279|6280|6282|6372|6515|7097|7276|7305|10576|11001|11031|25797|79888	A1BG|ALDOA|ANXA2|ARG1|ASAH1|C5AR1|CAT|CD44|CTSC|CSTB|DNASE1L3|SERPINB1|FCER1G|ITGAV|LYZ|MMP9|OLR1|PKM|PLAUR|QSOX1|S100A8|S100A9|S100A11|CXCL6|SLC2A3|TLR2|TTR|TYROBP|CCT2|SLC27A2|RAB31|QPCT|LPCAT1	-9	Input ID
GO-BP	19	GO:0046939	nucleotide phosphorylation	-11	8.6	11	24156	136	370	18	4.9	1.1	226|229|2023|2026|2203|3091|3099|3939|5209|5210|5214|5230|5313|5315|51085|54541|55526|55753	ALDOA|ALDOB|ENO1|ENO2|FBP1|HIF1A|HK2|LDHA|PFKFB3|PFKFB4|PFKP|PGK1|PKLR|PKM|MLXIPL|DDIT4|DHTKD1|OGDHL	-9	Input ID
GO-BP	19	GO:0010466	negative regulation of peptidase activity	-11	5.9	10	24156	266	370	24	6.5	1.3	462|866|960|1476|1992|3273|3697|3698|3699|3827|4018|4318|5054|5104|5267|5270|5272|5329|5345|5621|6694|9314|26998|51156	SERPINC1|SERPINA6|CD44|CSTB|SERPINB1|HRG|ITIH1|ITIH2|ITIH3|KNG1|LPA|MMP9|SERPINE1|SERPINA5|SERPINA4|SERPINE2|SERPINB9|PLAUR|SERPINF2|PRNP|SPP2|KLF4|FETUB|SERPINA10	-9	Input ID
GO-BP	19	GO:0009201	ribonucleoside triphosphate biosynthetic process	-11	7.4	11	24156	177	370	20	5.4	1.2	226|229|2023|2026|2203|3091|3099|3939|5209|5210|5214|5230|5313|5315|7114|51085|54541|55022|55526|55753	ALDOA|ALDOB|ENO1|ENO2|FBP1|HIF1A|HK2|LDHA|PFKFB3|PFKFB4|PFKP|PGK1|PKLR|PKM|TMSB4X|MLXIPL|DDIT4|PID1|DHTKD1|OGDHL	-9	Input ID
GO-BP	19	GO:0009179	purine ribonucleoside diphosphate metabolic process	-11	8.5	11	24156	139	370	18	4.9	1.1	226|229|2023|2026|2203|3091|3099|3939|5209|5210|5214|5230|5313|5315|51085|54541|55526|55753	ALDOA|ALDOB|ENO1|ENO2|FBP1|HIF1A|HK2|LDHA|PFKFB3|PFKFB4|PFKP|PGK1|PKLR|PKM|MLXIPL|DDIT4|DHTKD1|OGDHL	-8.9	Input ID
GO-BP	19	GO:0009135	purine nucleoside diphosphate metabolic process	-11	8.5	11	24156	139	370	18	4.9	1.1	226|229|2023|2026|2203|3091|3099|3939|5209|5210|5214|5230|5313|5315|51085|54541|55526|55753	ALDOA|ALDOB|ENO1|ENO2|FBP1|HIF1A|HK2|LDHA|PFKFB3|PFKFB4|PFKP|PGK1|PKLR|PKM|MLXIPL|DDIT4|DHTKD1|OGDHL	-8.9	Input ID
GO-BP	19	GO:0002275	myeloid cell activation involved in immune response	-11	4.1	9	24156	547	370	34	9.2	1.5	1|226|302|383|427|728|847|960|1075|1476|1776|1992|2207|3162|3685|4069|4318|4973|5315|5329|5768|6279|6280|6282|6515|7097|7276|7305|10576|11001|11031|25797|79888|84868	A1BG|ALDOA|ANXA2|ARG1|ASAH1|C5AR1|CAT|CD44|CTSC|CSTB|DNASE1L3|SERPINB1|FCER1G|HMOX1|ITGAV|LYZ|MMP9|OLR1|PKM|PLAUR|QSOX1|S100A8|S100A9|S100A11|SLC2A3|TLR2|TTR|TYROBP|CCT2|SLC27A2|RAB31|QPCT|LPCAT1|HAVCR2	-8.9	Input ID
GO-BP	19	GO:0009185	ribonucleoside diphosphate metabolic process	-11	8.3	11	24156	141	370	18	4.9	1.1	226|229|2023|2026|2203|3091|3099|3939|5209|5210|5214|5230|5313|5315|51085|54541|55526|55753	ALDOA|ALDOB|ENO1|ENO2|FBP1|HIF1A|HK2|LDHA|PFKFB3|PFKFB4|PFKP|PGK1|PKLR|PKM|MLXIPL|DDIT4|DHTKD1|OGDHL	-8.8	Input ID
GO-BP	19	GO:0072521	purine-containing compound metabolic process	-11	3.8	8.9	24156	613	370	36	9.7	1.5	226|229|2023|2026|2203|2538|3091|3099|3158|3939|5209|5210|5214|5230|5313|5315|5538|6319|7114|7276|7498|7923|10400|23433|27232|51085|51268|53354|54541|54988|55022|55526|55753|84649|123876|348158	ALDOA|ALDOB|ENO1|ENO2|FBP1|G6PC|HIF1A|HK2|HMGCS2|LDHA|PFKFB3|PFKFB4|PFKP|PGK1|PKLR|PKM|PPT1|SCD|TMSB4X|TTR|XDH|HSD17B8|PEMT|RHOQ|GNMT|MLXIPL|PIPOX|PANK1|DDIT4|ACSM5|PID1|DHTKD1|OGDHL|DGAT2|ACSM2A|ACSM2B	-8.8	Input ID
GO-BP	19	GO:0002283	neutrophil activation involved in immune response	-11	4.3	9.1	24156	491	370	32	8.6	1.5	1|226|302|383|427|728|847|960|1075|1476|1776|1992|2207|3685|4069|4318|4973|5315|5329|5768|6279|6280|6282|6515|7097|7276|7305|10576|11001|11031|25797|79888	A1BG|ALDOA|ANXA2|ARG1|ASAH1|C5AR1|CAT|CD44|CTSC|CSTB|DNASE1L3|SERPINB1|FCER1G|ITGAV|LYZ|MMP9|OLR1|PKM|PLAUR|QSOX1|S100A8|S100A9|S100A11|SLC2A3|TLR2|TTR|TYROBP|CCT2|SLC27A2|RAB31|QPCT|LPCAT1	-8.8	Input ID
GO-BP	19	GO:0046390	ribose phosphate biosynthetic process	-11	5.5	9.7	24156	299	370	25	6.8	1.3	226|229|2023|2026|2203|2539|3091|3099|3939|5209|5210|5214|5230|5313|5315|5538|6319|7114|7923|51085|53354|54541|55022|55526|55753	ALDOA|ALDOB|ENO1|ENO2|FBP1|G6PD|HIF1A|HK2|LDHA|PFKFB3|PFKFB4|PFKP|PGK1|PKLR|PKM|PPT1|SCD|TMSB4X|HSD17B8|MLXIPL|PANK1|DDIT4|PID1|DHTKD1|OGDHL	-8.7	Input ID
GO-BP	19	GO:0002263	cell activation involved in immune response	-11	3.6	8.7	24156	715	370	39	11	1.6	1|226|302|383|427|728|847|960|1075|1476|1776|1880|1992|2207|3162|3383|3685|3956|4069|4318|4973|5315|5329|5768|6279|6280|6282|6515|7097|7276|7305|10576|11001|11031|25797|56892|79888|84868|114770	A1BG|ALDOA|ANXA2|ARG1|ASAH1|C5AR1|CAT|CD44|CTSC|CSTB|DNASE1L3|GPR183|SERPINB1|FCER1G|HMOX1|ICAM1|ITGAV|LGALS1|LYZ|MMP9|OLR1|PKM|PLAUR|QSOX1|S100A8|S100A9|S100A11|SLC2A3|TLR2|TTR|TYROBP|CCT2|SLC27A2|RAB31|QPCT|TCIM|LPCAT1|HAVCR2|PGLYRP2	-8.7	Input ID
GO-BP	19	GO:0009127	purine nucleoside monophosphate biosynthetic process	-11	7.1	10	24156	183	370	20	5.4	1.2	226|229|2023|2026|2203|3091|3099|3939|5209|5210|5214|5230|5313|5315|7114|51085|54541|55022|55526|55753	ALDOA|ALDOB|ENO1|ENO2|FBP1|HIF1A|HK2|LDHA|PFKFB3|PFKFB4|PFKP|PGK1|PKLR|PKM|TMSB4X|MLXIPL|DDIT4|PID1|DHTKD1|OGDHL	-8.7	Input ID
GO-BP	19	GO:0009168	purine ribonucleoside monophosphate biosynthetic process	-11	7.1	10	24156	183	370	20	5.4	1.2	226|229|2023|2026|2203|3091|3099|3939|5209|5210|5214|5230|5313|5315|7114|51085|54541|55022|55526|55753	ALDOA|ALDOB|ENO1|ENO2|FBP1|HIF1A|HK2|LDHA|PFKFB3|PFKFB4|PFKP|PGK1|PKLR|PKM|TMSB4X|MLXIPL|DDIT4|PID1|DHTKD1|OGDHL	-8.7	Input ID
GO-BP	19	GO:0051917	regulation of fibrinolysis	-11	37	17	24156	14	370	8	2.2	0.76	1361|2160|2161|3273|3818|5054|5340|5345	CPB2|F11|F12|HRG|KLKB1|SERPINE1|PLG|SERPINF2	-8.7	Input ID
GO-BP	19	GO:0009152	purine ribonucleotide biosynthetic process	-11	5.6	9.7	24156	279	370	24	6.5	1.3	226|229|2023|2026|2203|3091|3099|3939|5209|5210|5214|5230|5313|5315|5538|6319|7114|7923|51085|53354|54541|55022|55526|55753	ALDOA|ALDOB|ENO1|ENO2|FBP1|HIF1A|HK2|LDHA|PFKFB3|PFKFB4|PFKP|PGK1|PKLR|PKM|PPT1|SCD|TMSB4X|HSD17B8|MLXIPL|PANK1|DDIT4|PID1|DHTKD1|OGDHL	-8.6	Input ID
GO-BP	19	GO:0009142	nucleoside triphosphate biosynthetic process	-11	6.9	10	24156	188	370	20	5.4	1.2	226|229|2023|2026|2203|3091|3099|3939|5209|5210|5214|5230|5313|5315|7114|51085|54541|55022|55526|55753	ALDOA|ALDOB|ENO1|ENO2|FBP1|HIF1A|HK2|LDHA|PFKFB3|PFKFB4|PFKP|PGK1|PKLR|PKM|TMSB4X|MLXIPL|DDIT4|PID1|DHTKD1|OGDHL	-8.6	Input ID
GO-BP	19	GO:0002576	platelet degranulation	-11	8.7	11	24156	128	370	17	4.6	1.1	1|226|308|335|2207|3273|3699|3827|5054|5267|5340|5345|5552|5768|6694|7114|10184	A1BG|ALDOA|ANXA5|APOA1|FCER1G|HRG|ITIH3|KNG1|SERPINE1|SERPINA4|PLG|SERPINF2|SRGN|QSOX1|SPP2|TMSB4X|LHFPL2	-8.6	Input ID
GO-BP	19	GO:0007596	blood coagulation	-11	5.1	9.3	24156	336	370	26	7	1.3	18|308|462|1192|1361|2155|2158|2160|2161|2165|2207|3273|3673|3818|3827|5054|5104|5270|5329|5340|5345|5624|8529|8858|23764|51156	ABAT|ANXA5|SERPINC1|CLIC1|CPB2|F7|F9|F11|F12|F13B|FCER1G|HRG|ITGA2|KLKB1|KNG1|SERPINE1|SERPINA5|SERPINE2|PLAUR|PLG|SERPINF2|PROC|CYP4F2|PROZ|MAFF|SERPINA10	-8.5	Input ID
GO-BP	19	GO:1901361	organic cyclic compound catabolic process	-11	3.4	8.4	24156	768	370	40	11	1.6	226|229|1548|1581|1593|1610|1776|1807|1808|2023|2026|2203|3081|3091|3099|3162|3242|3939|5209|5210|5214|5230|5313|5315|5446|6696|6718|6898|7498|7538|8564|9104|10643|10841|23498|51085|51733|54541|55526|55753	ALDOA|ALDOB|CYP2A6|CYP7A1|CYP27A1|DAO|DNASE1L3|DPYS|DPYSL2|ENO1|ENO2|FBP1|HGD|HIF1A|HK2|HMOX1|HPD|LDHA|PFKFB3|PFKFB4|PFKP|PGK1|PKLR|PKM|PON3|SPP1|AKR1D1|TAT|XDH|ZFP36|KMO|RGN|IGF2BP3|FTCD|HAAO|MLXIPL|UPB1|DDIT4|DHTKD1|OGDHL	-8.4	Input ID
GO-BP	19	GO:0007599	hemostasis	-11	5	9.2	24156	341	370	26	7	1.3	18|308|462|1192|1361|2155|2158|2160|2161|2165|2207|3273|3673|3818|3827|5054|5104|5270|5329|5340|5345|5624|8529|8858|23764|51156	ABAT|ANXA5|SERPINC1|CLIC1|CPB2|F7|F9|F11|F12|F13B|FCER1G|HRG|ITGA2|KLKB1|KNG1|SERPINE1|SERPINA5|SERPINE2|PLAUR|PLG|SERPINF2|PROC|CYP4F2|PROZ|MAFF|SERPINA10	-8.3	Input ID
GO-BP	19	GO:0050817	coagulation	-11	5	9.2	24156	342	370	26	7	1.3	18|308|462|1192|1361|2155|2158|2160|2161|2165|2207|3273|3673|3818|3827|5054|5104|5270|5329|5340|5345|5624|8529|8858|23764|51156	ABAT|ANXA5|SERPINC1|CLIC1|CPB2|F7|F9|F11|F12|F13B|FCER1G|HRG|ITGA2|KLKB1|KNG1|SERPINE1|SERPINA5|SERPINE2|PLAUR|PLG|SERPINF2|PROC|CYP4F2|PROZ|MAFF|SERPINA10	-8.3	Input ID
GO-BP	19	GO:0002366	leukocyte activation involved in immune response	-11	3.5	8.4	24156	711	370	38	10	1.6	1|226|302|383|427|728|847|960|1075|1476|1776|1880|1992|2207|3162|3383|3685|3956|4069|4318|4973|5315|5329|5768|6279|6280|6282|6515|7097|7276|7305|10576|11001|11031|25797|79888|84868|114770	A1BG|ALDOA|ANXA2|ARG1|ASAH1|C5AR1|CAT|CD44|CTSC|CSTB|DNASE1L3|GPR183|SERPINB1|FCER1G|HMOX1|ICAM1|ITGAV|LGALS1|LYZ|MMP9|OLR1|PKM|PLAUR|QSOX1|S100A8|S100A9|S100A11|SLC2A3|TLR2|TTR|TYROBP|CCT2|SLC27A2|RAB31|QPCT|LPCAT1|HAVCR2|PGLYRP2	-8.3	Input ID
GO-BP	19	GO:0031639	plasminogen activation	-11	26	15	24156	23	370	9	2.4	0.8	1361|2023|2160|2161|3818|5054|5230|5270|5345	CPB2|ENO1|F11|F12|KLKB1|SERPINE1|PGK1|SERPINE2|SERPINF2	-8.3	Input ID
GO-BP	19	GO:0043312	neutrophil degranulation	-11	4.1	8.8	24156	488	370	31	8.4	1.4	1|226|302|383|427|728|847|960|1075|1476|1992|2207|3685|4069|4318|4973|5315|5329|5768|6279|6280|6282|6515|7097|7276|7305|10576|11001|11031|25797|79888	A1BG|ALDOA|ANXA2|ARG1|ASAH1|C5AR1|CAT|CD44|CTSC|CSTB|SERPINB1|FCER1G|ITGAV|LYZ|MMP9|OLR1|PKM|PLAUR|QSOX1|S100A8|S100A9|S100A11|SLC2A3|TLR2|TTR|TYROBP|CCT2|SLC27A2|RAB31|QPCT|LPCAT1	-8.3	Input ID
GO-BP	19	GO:0009260	ribonucleotide biosynthetic process	-11	5.4	9.4	24156	292	370	24	6.5	1.3	226|229|2023|2026|2203|3091|3099|3939|5209|5210|5214|5230|5313|5315|5538|6319|7114|7923|51085|53354|54541|55022|55526|55753	ALDOA|ALDOB|ENO1|ENO2|FBP1|HIF1A|HK2|LDHA|PFKFB3|PFKFB4|PFKP|PGK1|PKLR|PKM|PPT1|SCD|TMSB4X|HSD17B8|MLXIPL|PANK1|DDIT4|PID1|DHTKD1|OGDHL	-8.3	Input ID
GO-BP	19	GO:0052548	regulation of endopeptidase activity	-11	4.4	8.9	24156	429	370	29	7.8	1.4	462|866|960|1476|1992|3273|3491|3697|3698|3699|3827|4018|4318|5054|5104|5267|5270|5272|5329|5345|5621|6279|6280|6694|7498|9314|26998|51156|112399	SERPINC1|SERPINA6|CD44|CSTB|SERPINB1|HRG|CCN1|ITIH1|ITIH2|ITIH3|KNG1|LPA|MMP9|SERPINE1|SERPINA5|SERPINA4|SERPINE2|SERPINB9|PLAUR|SERPINF2|PRNP|S100A8|S100A9|SPP2|XDH|KLF4|FETUB|SERPINA10|EGLN3	-8.3	Input ID
GO-BP	19	GO:0043062	extracellular structure organization	-11	4.4	8.9	24156	429	370	29	7.8	1.4	335|344|345|960|1361|1462|3383|3491|3673|3685|3818|3912|4015|4018|4312|4316|4318|4321|4851|5054|5340|5345|5360|5444|5768|6696|7276|30001|164656	APOA1|APOC2|APOC3|CD44|CPB2|VCAN|ICAM1|CCN1|ITGA2|ITGAV|KLKB1|LAMB1|LOX|LPA|MMP1|MMP7|MMP9|MMP12|NOTCH1|SERPINE1|PLG|SERPINF2|PLTP|PON1|QSOX1|SPP1|TTR|ERO1A|TMPRSS6	-8.3	Input ID
GO-BP	19	GO:0009156	ribonucleoside monophosphate biosynthetic process	-11	6.6	9.9	24156	197	370	20	5.4	1.2	226|229|2023|2026|2203|3091|3099|3939|5209|5210|5214|5230|5313|5315|7114|51085|54541|55022|55526|55753	ALDOA|ALDOB|ENO1|ENO2|FBP1|HIF1A|HK2|LDHA|PFKFB3|PFKFB4|PFKP|PGK1|PKLR|PKM|TMSB4X|MLXIPL|DDIT4|PID1|DHTKD1|OGDHL	-8.2	Input ID
GO-BP	19	GO:0009132	nucleoside diphosphate metabolic process	-10	7.4	10	24156	159	370	18	4.9	1.1	226|229|2023|2026|2203|3091|3099|3939|5209|5210|5214|5230|5313|5315|51085|54541|55526|55753	ALDOA|ALDOB|ENO1|ENO2|FBP1|HIF1A|HK2|LDHA|PFKFB3|PFKFB4|PFKP|PGK1|PKLR|PKM|MLXIPL|DDIT4|DHTKD1|OGDHL	-8	Input ID
GO-BP	19	GO:0006164	purine nucleotide biosynthetic process	-10	5.2	9.2	24156	300	370	24	6.5	1.3	226|229|2023|2026|2203|3091|3099|3939|5209|5210|5214|5230|5313|5315|5538|6319|7114|7923|51085|53354|54541|55022|55526|55753	ALDOA|ALDOB|ENO1|ENO2|FBP1|HIF1A|HK2|LDHA|PFKFB3|PFKFB4|PFKP|PGK1|PKLR|PKM|PPT1|SCD|TMSB4X|HSD17B8|MLXIPL|PANK1|DDIT4|PID1|DHTKD1|OGDHL	-8	Input ID
GO-BP	19	GO:0051346	negative regulation of hydrolase activity	-10	4.2	8.6	24156	470	370	30	8.1	1.4	335|345|462|866|960|1476|1992|3273|3697|3698|3699|3827|4018|4318|5054|5104|5267|5270|5272|5329|5345|5502|5621|5997|6694|9104|9314|23645|26998|51156	APOA1|APOC3|SERPINC1|SERPINA6|CD44|CSTB|SERPINB1|HRG|ITIH1|ITIH2|ITIH3|KNG1|LPA|MMP9|SERPINE1|SERPINA5|SERPINA4|SERPINE2|SERPINB9|PLAUR|SERPINF2|PPP1R1A|PRNP|RGS2|SPP2|RGN|KLF4|PPP1R15A|FETUB|SERPINA10	-8	Input ID
GO-BP	19	GO:0031667	response to nutrient levels	-10	4	8.6	24156	501	370	31	8.4	1.4	133|335|383|462|467|847|1373|1649|2155|2538|2539|3162|3383|3673|3725|3939|4316|5106|5313|5315|5444|6513|6696|6781|7538|9518|10400|10991|55062|58528|81631	ADM|APOA1|ARG1|SERPINC1|ATF3|CAT|CPS1|DDIT3|F7|G6PC|G6PD|HMOX1|ICAM1|ITGA2|JUN|LDHA|MMP7|PCK2|PKLR|PKM|PON1|SLC2A1|SPP1|STC1|ZFP36|GDF15|PEMT|SLC38A3|WIPI1|RRAGD|MAP1LC3B	-8	Input ID
GO-BP	19	GO:0009991	response to extracellular stimulus	-10	3.9	8.5	24156	534	370	32	8.6	1.5	133|335|383|462|467|847|1373|1649|2155|2353|2538|2539|3162|3383|3673|3725|3939|4316|5106|5313|5315|5444|6513|6696|6781|7538|9518|10400|10991|55062|58528|81631	ADM|APOA1|ARG1|SERPINC1|ATF3|CAT|CPS1|DDIT3|F7|FOS|G6PC|G6PD|HMOX1|ICAM1|ITGA2|JUN|LDHA|MMP7|PCK2|PKLR|PKM|PON1|SLC2A1|SPP1|STC1|ZFP36|GDF15|PEMT|SLC38A3|WIPI1|RRAGD|MAP1LC3B	-8	Input ID
GO-BP	19	GO:0042730	fibrinolysis	-10	24	14	24156	25	370	9	2.4	0.8	1361|2160|2161|3273|3818|5054|5329|5340|5345	CPB2|F11|F12|HRG|KLKB1|SERPINE1|PLAUR|PLG|SERPINF2	-7.9	Input ID
GO-BP	19	GO:0043299	leukocyte degranulation	-10	3.9	8.4	24156	537	370	32	8.6	1.5	1|226|302|383|427|728|847|960|1075|1476|1992|2207|3162|3685|4069|4318|4973|5315|5329|5768|6279|6280|6282|6515|7097|7276|7305|10576|11001|11031|25797|79888	A1BG|ALDOA|ANXA2|ARG1|ASAH1|C5AR1|CAT|CD44|CTSC|CSTB|SERPINB1|FCER1G|HMOX1|ITGAV|LYZ|MMP9|OLR1|PKM|PLAUR|QSOX1|S100A8|S100A9|S100A11|SLC2A3|TLR2|TTR|TYROBP|CCT2|SLC27A2|RAB31|QPCT|LPCAT1	-7.9	Input ID
GO-BP	19	GO:0009166	nucleotide catabolic process	-10	6.7	9.8	24156	184	370	19	5.1	1.1	226|229|2023|2026|2203|3091|3099|3939|5209|5210|5214|5230|5313|5315|7498|51085|54541|55526|55753	ALDOA|ALDOB|ENO1|ENO2|FBP1|HIF1A|HK2|LDHA|PFKFB3|PFKFB4|PFKP|PGK1|PKLR|PKM|XDH|MLXIPL|DDIT4|DHTKD1|OGDHL	-7.9	Input ID
GO-BP	19	GO:0009124	nucleoside monophosphate biosynthetic process	-10	6.3	9.5	24156	208	370	20	5.4	1.2	226|229|2023|2026|2203|3091|3099|3939|5209|5210|5214|5230|5313|5315|7114|51085|54541|55022|55526|55753	ALDOA|ALDOB|ENO1|ENO2|FBP1|HIF1A|HK2|LDHA|PFKFB3|PFKFB4|PFKP|PGK1|PKLR|PKM|TMSB4X|MLXIPL|DDIT4|PID1|DHTKD1|OGDHL	-7.9	Input ID
GO-BP	19	GO:1903035	negative regulation of response to wounding	-10	10	11	24156	89	370	14	3.8	0.99	18|1361|2160|2161|3273|3818|3827|5054|5270|5329|5340|5345|5624|6696	ABAT|CPB2|F11|F12|HRG|KLKB1|KNG1|SERPINE1|SERPINE2|PLAUR|PLG|SERPINF2|PROC|SPP1	-7.9	Input ID
GO-BP	19	GO:0061045	negative regulation of wound healing	-10	11	11	24156	74	370	13	3.5	0.96	18|1361|2160|2161|3273|3818|3827|5054|5270|5329|5340|5345|5624	ABAT|CPB2|F11|F12|HRG|KLKB1|KNG1|SERPINE1|SERPINE2|PLAUR|PLG|SERPINF2|PROC	-7.8	Input ID
GO-BP	19	GO:0019693	ribose phosphate metabolic process	-10	3.7	8.3	24156	578	370	33	8.9	1.5	226|229|2023|2026|2203|2539|3091|3099|3158|3939|5209|5210|5214|5230|5313|5315|5538|6319|7086|7114|7923|23433|51085|51268|53354|54541|54988|55022|55526|55753|84649|123876|348158	ALDOA|ALDOB|ENO1|ENO2|FBP1|G6PD|HIF1A|HK2|HMGCS2|LDHA|PFKFB3|PFKFB4|PFKP|PGK1|PKLR|PKM|PPT1|SCD|TKT|TMSB4X|HSD17B8|RHOQ|MLXIPL|PIPOX|PANK1|DDIT4|ACSM5|PID1|DHTKD1|OGDHL|DGAT2|ACSM2A|ACSM2B	-7.8	Input ID
GO-BP	19	GO:0072522	purine-containing compound biosynthetic process	-9.9	5	8.9	24156	313	370	24	6.5	1.3	226|229|2023|2026|2203|3091|3099|3939|5209|5210|5214|5230|5313|5315|5538|6319|7114|7923|51085|53354|54541|55022|55526|55753	ALDOA|ALDOB|ENO1|ENO2|FBP1|HIF1A|HK2|LDHA|PFKFB3|PFKFB4|PFKP|PGK1|PKLR|PKM|PPT1|SCD|TMSB4X|HSD17B8|MLXIPL|PANK1|DDIT4|PID1|DHTKD1|OGDHL	-7.7	Input ID
GO-BP	19	GO:0045861	negative regulation of proteolysis	-9.9	4.6	8.7	24156	368	370	26	7	1.3	462|866|960|1361|1476|1992|3273|3697|3698|3699|3827|4018|4318|5054|5104|5267|5270|5272|5329|5345|5621|6694|9314|11326|26998|51156	SERPINC1|SERPINA6|CD44|CPB2|CSTB|SERPINB1|HRG|ITIH1|ITIH2|ITIH3|KNG1|LPA|MMP9|SERPINE1|SERPINA5|SERPINA4|SERPINE2|SERPINB9|PLAUR|SERPINF2|PRNP|SPP2|KLF4|VSIG4|FETUB|SERPINA10	-7.7	Input ID
GO-BP	19	GO:1901292	nucleoside phosphate catabolic process	-9.9	6.5	9.5	24156	190	370	19	5.1	1.1	226|229|2023|2026|2203|3091|3099|3939|5209|5210|5214|5230|5313|5315|7498|51085|54541|55526|55753	ALDOA|ALDOB|ENO1|ENO2|FBP1|HIF1A|HK2|LDHA|PFKFB3|PFKFB4|PFKP|PGK1|PKLR|PKM|XDH|MLXIPL|DDIT4|DHTKD1|OGDHL	-7.7	Input ID
GO-BP	19	GO:0009410	response to xenobiotic stimulus	-9.9	5.2	9	24156	288	370	23	6.2	1.3	18|383|670|1373|1548|1549|1551|1559|1577|2052|2155|2806|3383|5106|5244|5446|5997|6529|7852|8824|8856|54541|348158	ABAT|ARG1|BPHL|CPS1|CYP2A6|CYP2A7|CYP3A7|CYP2C9|CYP3A5|EPHX1|F7|GOT2|ICAM1|PCK2|ABCB4|PON3|RGS2|SLC6A1|CXCR4|CES2|NR1I2|DDIT4|ACSM2B	-7.7	Input ID
GO-BP	19	GO:0052547	regulation of peptidase activity	-9.8	4.1	8.4	24156	460	370	29	7.8	1.4	462|866|960|1476|1992|3273|3491|3697|3698|3699|3827|4018|4318|5054|5104|5267|5270|5272|5329|5345|5621|6279|6280|6694|7498|9314|26998|51156|112399	SERPINC1|SERPINA6|CD44|CSTB|SERPINB1|HRG|CCN1|ITIH1|ITIH2|ITIH3|KNG1|LPA|MMP9|SERPINE1|SERPINA5|SERPINA4|SERPINE2|SERPINB9|PLAUR|SERPINF2|PRNP|S100A8|S100A9|SPP2|XDH|KLF4|FETUB|SERPINA10|EGLN3	-7.6	Input ID
GO-BP	19	GO:0006735	NADH regeneration	-9.8	22	13	24156	27	370	9	2.4	0.8	226|229|2023|2026|3099|5214|5230|5313|5315	ALDOA|ALDOB|ENO1|ENO2|HK2|PFKP|PGK1|PKLR|PKM	-7.6	Input ID
GO-BP	19	GO:0061718	glucose catabolic process to pyruvate	-9.8	22	13	24156	27	370	9	2.4	0.8	226|229|2023|2026|3099|5214|5230|5313|5315	ALDOA|ALDOB|ENO1|ENO2|HK2|PFKP|PGK1|PKLR|PKM	-7.6	Input ID
GO-BP	19	GO:0061621	canonical glycolysis	-9.8	22	13	24156	27	370	9	2.4	0.8	226|229|2023|2026|3099|5214|5230|5313|5315	ALDOA|ALDOB|ENO1|ENO2|HK2|PFKP|PGK1|PKLR|PKM	-7.6	Input ID
GO-BP	19	GO:0072329	monocarboxylic acid catabolic process	-9.8	8	10	24156	130	370	16	4.3	1.1	18|189|1579|1962|4051|4594|5106|5264|5446|6718|7915|8309|8529|11001|51084|55268	ABAT|AGXT|CYP4A11|EHHADH|CYP4F3|MMUT|PCK2|PHYH|PON3|AKR1D1|ALDH5A1|ACOX2|CYP4F2|SLC27A2|CRYL1|ECHDC2	-7.6	Input ID
GO-BP	19	GO:0061620	glycolytic process through glucose-6-phosphate	-9.6	21	13	24156	28	370	9	2.4	0.8	226|229|2023|2026|3099|5214|5230|5313|5315	ALDOA|ALDOB|ENO1|ENO2|HK2|PFKP|PGK1|PKLR|PKM	-7.5	Input ID
GO-BP	19	GO:0032103	positive regulation of response to external stimulus	-9.6	4.8	8.6	24156	325	370	24	6.5	1.3	383|728|1075|1361|2155|2161|2207|3273|3570|3673|3818|4363|5054|5340|5345|6279|6280|7097|7114|7852|9180|23643|27347|84868	ARG1|C5AR1|CTSC|CPB2|F7|F12|FCER1G|HRG|IL6R|ITGA2|KLKB1|ABCC1|SERPINE1|PLG|SERPINF2|S100A8|S100A9|TLR2|TMSB4X|CXCR4|OSMR|LY96|STK39|HAVCR2	-7.4	Input ID
GO-BP	19	GO:0046434	organophosphate catabolic process	-9.5	5.5	8.9	24156	249	370	21	5.7	1.2	226|229|344|2023|2026|2203|3091|3099|3939|5209|5210|5214|5230|5313|5315|5444|7498|51085|54541|55526|55753	ALDOA|ALDOB|APOC2|ENO1|ENO2|FBP1|HIF1A|HK2|LDHA|PFKFB3|PFKFB4|PFKP|PGK1|PKLR|PKM|PON1|XDH|MLXIPL|DDIT4|DHTKD1|OGDHL	-7.3	Input ID
GO-BP	19	GO:0061615	glycolytic process through fructose-6-phosphate	-9.5	20	13	24156	29	370	9	2.4	0.8	226|229|2023|2026|3099|5214|5230|5313|5315	ALDOA|ALDOB|ENO1|ENO2|HK2|PFKP|PGK1|PKLR|PKM	-7.3	Input ID
GO-BP	19	GO:0009165	nucleotide biosynthetic process	-9.5	4.4	8.4	24156	385	370	26	7	1.3	226|229|2023|2026|2203|3091|3099|3939|5209|5210|5214|5230|5313|5315|5538|6319|7114|7923|8564|23498|51085|53354|54541|55022|55526|55753	ALDOA|ALDOB|ENO1|ENO2|FBP1|HIF1A|HK2|LDHA|PFKFB3|PFKFB4|PFKP|PGK1|PKLR|PKM|PPT1|SCD|TMSB4X|HSD17B8|KMO|HAAO|MLXIPL|PANK1|DDIT4|PID1|DHTKD1|OGDHL	-7.3	Input ID
GO-BP	19	GO:0009117	nucleotide metabolic process	-9.4	3.3	7.8	24156	710	370	36	9.7	1.5	226|229|2023|2026|2203|2539|3091|3099|3158|3939|5209|5210|5214|5230|5313|5315|5538|6319|7086|7114|7498|7923|8564|23433|23498|51085|51268|53354|54541|54988|55022|55526|55753|84649|123876|348158	ALDOA|ALDOB|ENO1|ENO2|FBP1|G6PD|HIF1A|HK2|HMGCS2|LDHA|PFKFB3|PFKFB4|PFKP|PGK1|PKLR|PKM|PPT1|SCD|TKT|TMSB4X|XDH|HSD17B8|KMO|RHOQ|HAAO|MLXIPL|PIPOX|PANK1|DDIT4|ACSM5|PID1|DHTKD1|OGDHL|DGAT2|ACSM2A|ACSM2B	-7.3	Input ID
GO-BP	19	GO:0046365	monosaccharide catabolic process	-9.4	12	11	24156	67	370	12	3.2	0.92	226|229|2023|2026|3099|3795|5214|5230|5313|5315|51084|132158	ALDOA|ALDOB|ENO1|ENO2|HK2|KHK|PFKP|PGK1|PKLR|PKM|CRYL1|GLYCTK	-7.2	Input ID
GO-BP	19	GO:0009150	purine ribonucleotide metabolic process	-9.4	3.7	8	24156	543	370	31	8.4	1.4	226|229|2023|2026|2203|3091|3099|3158|3939|5209|5210|5214|5230|5313|5315|5538|6319|7114|7923|23433|51085|51268|53354|54541|54988|55022|55526|55753|84649|123876|348158	ALDOA|ALDOB|ENO1|ENO2|FBP1|HIF1A|HK2|HMGCS2|LDHA|PFKFB3|PFKFB4|PFKP|PGK1|PKLR|PKM|PPT1|SCD|TMSB4X|HSD17B8|RHOQ|MLXIPL|PIPOX|PANK1|DDIT4|ACSM5|PID1|DHTKD1|OGDHL|DGAT2|ACSM2A|ACSM2B	-7.2	Input ID
GO-BP	19	GO:1901293	nucleoside phosphate biosynthetic process	-9.4	4.4	8.3	24156	389	370	26	7	1.3	226|229|2023|2026|2203|3091|3099|3939|5209|5210|5214|5230|5313|5315|5538|6319|7114|7923|8564|23498|51085|53354|54541|55022|55526|55753	ALDOA|ALDOB|ENO1|ENO2|FBP1|HIF1A|HK2|LDHA|PFKFB3|PFKFB4|PFKP|PGK1|PKLR|PKM|PPT1|SCD|TMSB4X|HSD17B8|KMO|HAAO|MLXIPL|PANK1|DDIT4|PID1|DHTKD1|OGDHL	-7.2	Input ID
GO-BP	19	GO:0006163	purine nucleotide metabolic process	-9.4	3.6	7.9	24156	577	370	32	8.6	1.5	226|229|2023|2026|2203|3091|3099|3158|3939|5209|5210|5214|5230|5313|5315|5538|6319|7114|7498|7923|23433|51085|51268|53354|54541|54988|55022|55526|55753|84649|123876|348158	ALDOA|ALDOB|ENO1|ENO2|FBP1|HIF1A|HK2|HMGCS2|LDHA|PFKFB3|PFKFB4|PFKP|PGK1|PKLR|PKM|PPT1|SCD|TMSB4X|XDH|HSD17B8|RHOQ|MLXIPL|PIPOX|PANK1|DDIT4|ACSM5|PID1|DHTKD1|OGDHL|DGAT2|ACSM2A|ACSM2B	-7.2	Input ID
GO-BP	19	GO:0008610	lipid biosynthetic process	-9.3	3.3	7.7	24156	715	370	36	9.7	1.5	133|241|283|335|344|345|427|1551|1559|1579|1581|1593|2539|2822|3158|3491|5106|6319|6718|7108|7923|8309|9104|10400|10998|11001|51085|54988|55224|79888|80168|84002|84649|123876|345275|348158	ADM|ALOX5AP|ANG|APOA1|APOC2|APOC3|ASAH1|CYP3A7|CYP2C9|CYP4A11|CYP7A1|CYP27A1|G6PD|GPLD1|HMGCS2|CCN1|PCK2|SCD|AKR1D1|TM7SF2|HSD17B8|ACOX2|RGN|PEMT|SLC27A5|SLC27A2|MLXIPL|ACSM5|ETNK2|LPCAT1|MOGAT2|B3GNT5|DGAT2|ACSM2A|HSD17B13|ACSM2B	-7.2	Input ID
GO-BP	19	GO:0010038	response to metal ion	-9.3	4.5	8.4	24156	363	370	25	6.8	1.3	18|241|383|847|1373|2203|2353|2539|2822|3091|3162|3383|3725|3795|4318|5066|5313|5621|6279|6529|6898|7036|8754|10397|23498	ABAT|ALOX5AP|ARG1|CAT|CPS1|FBP1|FOS|G6PD|GPLD1|HIF1A|HMOX1|ICAM1|JUN|KHK|MMP9|PAM|PKLR|PRNP|S100A8|SLC6A1|TAT|TFR2|ADAM9|NDRG1|HAAO	-7.2	Input ID
GO-BP	19	GO:0006753	nucleoside phosphate metabolic process	-9.3	3.3	7.7	24156	717	370	36	9.7	1.5	226|229|2023|2026|2203|2539|3091|3099|3158|3939|5209|5210|5214|5230|5313|5315|5538|6319|7086|7114|7498|7923|8564|23433|23498|51085|51268|53354|54541|54988|55022|55526|55753|84649|123876|348158	ALDOA|ALDOB|ENO1|ENO2|FBP1|G6PD|HIF1A|HK2|HMGCS2|LDHA|PFKFB3|PFKFB4|PFKP|PGK1|PKLR|PKM|PPT1|SCD|TKT|TMSB4X|XDH|HSD17B8|KMO|RHOQ|HAAO|MLXIPL|PIPOX|PANK1|DDIT4|ACSM5|PID1|DHTKD1|OGDHL|DGAT2|ACSM2A|ACSM2B	-7.2	Input ID
GO-BP	19	GO:0009435	NAD biosynthetic process	-9.1	13	11	24156	56	370	11	3	0.88	226|229|2023|2026|3099|5214|5230|5313|5315|8564|23498	ALDOA|ALDOB|ENO1|ENO2|HK2|PFKP|PGK1|PKLR|PKM|KMO|HAAO	-7	Input ID
GO-BP	19	GO:0009259	ribonucleotide metabolic process	-9.1	3.6	7.8	24156	558	370	31	8.4	1.4	226|229|2023|2026|2203|3091|3099|3158|3939|5209|5210|5214|5230|5313|5315|5538|6319|7114|7923|23433|51085|51268|53354|54541|54988|55022|55526|55753|84649|123876|348158	ALDOA|ALDOB|ENO1|ENO2|FBP1|HIF1A|HK2|HMGCS2|LDHA|PFKFB3|PFKFB4|PFKP|PGK1|PKLR|PKM|PPT1|SCD|TMSB4X|HSD17B8|RHOQ|MLXIPL|PIPOX|PANK1|DDIT4|ACSM5|PID1|DHTKD1|OGDHL|DGAT2|ACSM2A|ACSM2B	-7	Input ID
GO-BP	19	GO:1901606	alpha-amino acid catabolic process	-9.1	8.7	9.9	24156	105	370	14	3.8	0.99	189|383|1610|2806|3081|3242|4143|6898|8564|10841|23498|27165|51268|137872	AGXT|ARG1|DAO|GOT2|HGD|HPD|MAT1A|TAT|KMO|FTCD|HAAO|GLS2|PIPOX|ADHFE1	-7	Input ID
GO-BP	19	GO:0019439	aromatic compound catabolic process	-9.1	3.2	7.6	24156	730	370	36	9.7	1.5	226|229|1548|1776|1807|2023|2026|2052|2203|3081|3091|3099|3162|3242|3939|5209|5210|5214|5230|5313|5315|5444|5446|6898|7498|7538|8564|9104|10643|10841|23498|51085|51733|54541|55526|55753	ALDOA|ALDOB|CYP2A6|DNASE1L3|DPYS|ENO1|ENO2|EPHX1|FBP1|HGD|HIF1A|HK2|HMOX1|HPD|LDHA|PFKFB3|PFKFB4|PFKP|PGK1|PKLR|PKM|PON1|PON3|TAT|XDH|ZFP36|KMO|RGN|IGF2BP3|FTCD|HAAO|MLXIPL|UPB1|DDIT4|DHTKD1|OGDHL	-7	Input ID
GO-BP	19	GO:0042737	drug catabolic process	-9.1	7.2	9.3	24156	145	370	16	4.3	1.1	622|847|1548|1549|1559|1577|1610|1807|2329|3081|3242|5106|6898|8856|51268|80896	BDH1|CAT|CYP2A6|CYP2A7|CYP2C9|CYP3A5|DAO|DPYS|FMO4|HGD|HPD|PCK2|TAT|NR1I2|PIPOX|NPL	-6.9	Input ID
GO-BP	19	GO:0019320	hexose catabolic process	-9	13	11	24156	57	370	11	3	0.88	226|229|2023|2026|3099|3795|5214|5230|5313|5315|132158	ALDOA|ALDOB|ENO1|ENO2|HK2|KHK|PFKP|PGK1|PKLR|PKM|GLYCTK	-6.9	Input ID
GO-BP	19	GO:0016051	carbohydrate biosynthetic process	-9	5.8	8.8	24156	214	370	19	5.1	1.1	226|229|467|2023|2026|2203|2538|2539|2806|2998|5106|5230|5950|6513|7086|9104|27232|84002|84649	ALDOA|ALDOB|ATF3|ENO1|ENO2|FBP1|G6PC|G6PD|GOT2|GYS2|PCK2|PGK1|RBP4|SLC2A1|TKT|RGN|GNMT|B3GNT5|DGAT2	-6.9	Input ID
GO-BP	19	GO:0010876	lipid localization	-9	4.2	8.1	24156	405	370	26	7	1.3	123|302|335|344|345|1579|2806|3685|4018|4363|5104|5244|5360|5444|5950|6554|6696|8529|10877|10998|11000|11001|11309|29923|84647|84649	PLIN2|ANXA2|APOA1|APOC2|APOC3|CYP4A11|GOT2|ITGAV|LPA|ABCC1|SERPINA5|ABCB4|PLTP|PON1|RBP4|SLC10A1|SPP1|CYP4F2|CFHR4|SLC27A5|SLC27A3|SLC27A2|SLCO2B1|HILPDA|PLA2G12B|DGAT2	-6.9	Input ID
GO-BP	19	GO:0090407	organophosphate biosynthetic process	-9	3.3	7.6	24156	700	370	35	9.5	1.5	226|229|335|1373|2023|2026|2203|2539|3091|3099|3158|3939|5209|5210|5214|5230|5313|5315|5538|6319|7086|7114|7923|8564|10400|23498|51084|51085|53354|54541|55022|55224|55526|55753|79888	ALDOA|ALDOB|APOA1|CPS1|ENO1|ENO2|FBP1|G6PD|HIF1A|HK2|HMGCS2|LDHA|PFKFB3|PFKFB4|PFKP|PGK1|PKLR|PKM|PPT1|SCD|TKT|TMSB4X|HSD17B8|KMO|PEMT|HAAO|CRYL1|MLXIPL|PANK1|DDIT4|PID1|ETNK2|DHTKD1|OGDHL|LPCAT1	-6.9	Input ID
GO-BP	19	GO:0006000	fructose metabolic process	-9	30	14	24156	15	370	7	1.9	0.71	226|229|2203|3795|5209|5210|132158	ALDOA|ALDOB|FBP1|KHK|PFKFB3|PFKFB4|GLYCTK	-6.9	Input ID
GO-BP	19	GO:0042445	hormone metabolic process	-9	5.4	8.6	24156	241	370	20	5.4	1.2	124|133|335|866|1551|1559|1577|1593|3091|5446|5950|6567|6696|6718|7276|7923|8608|25825|59342|84649	ADH1A|ADM|APOA1|SERPINA6|CYP3A7|CYP2C9|CYP3A5|CYP27A1|HIF1A|PON3|RBP4|SLC16A2|SPP1|AKR1D1|TTR|HSD17B8|RDH16|BACE2|SCPEP1|DGAT2	-6.8	Input ID
GO-BP	19	GO:0006094	gluconeogenesis	-8.9	9.3	9.9	24156	91	370	13	3.5	0.96	226|229|467|2023|2026|2203|2538|2806|5106|5230|5950|27232|84649	ALDOA|ALDOB|ATF3|ENO1|ENO2|FBP1|G6PC|GOT2|PCK2|PGK1|RBP4|GNMT|DGAT2	-6.8	Input ID
GO-BP	19	GO:0002526	acute inflammatory response	-8.8	5.6	8.6	24156	222	370	19	5.1	1.1	462|714|728|729|732|1361|1776|2161|2207|3383|3570|3818|5345|6279|6291|7036|9180|10877|11326	SERPINC1|C1QC|C5AR1|C6|C8B|CPB2|DNASE1L3|F12|FCER1G|ICAM1|IL6R|KLKB1|SERPINF2|S100A8|SAA4|TFR2|OSMR|CFHR4|VSIG4	-6.7	Input ID
GO-BP	19	GO:0016042	lipid catabolic process	-8.7	4.5	8.1	24156	331	370	23	6.2	1.3	335|344|345|427|1373|1579|1581|1593|1962|2822|4051|4594|5106|5264|5538|6696|6718|8309|8529|11001|55268|79887|84647	APOA1|APOC2|APOC3|ASAH1|CPS1|CYP4A11|CYP7A1|CYP27A1|EHHADH|GPLD1|CYP4F3|MMUT|PCK2|PHYH|PPT1|SPP1|AKR1D1|ACOX2|CYP4F2|SLC27A2|ECHDC2|PLBD1|PLA2G12B	-6.6	Input ID
GO-BP	19	GO:0019319	hexose biosynthetic process	-8.7	9	9.7	24156	94	370	13	3.5	0.96	226|229|467|2023|2026|2203|2538|2806|5106|5230|5950|27232|84649	ALDOA|ALDOB|ATF3|ENO1|ENO2|FBP1|G6PC|GOT2|PCK2|PGK1|RBP4|GNMT|DGAT2	-6.6	Input ID
GO-BP	19	GO:0019674	NAD metabolic process	-8.7	10	10	24156	77	370	12	3.2	0.92	226|229|2023|2026|3099|3939|5214|5230|5313|5315|8564|23498	ALDOA|ALDOB|ENO1|ENO2|HK2|LDHA|PFKP|PGK1|PKLR|PKM|KMO|HAAO	-6.6	Input ID
GO-BP	19	GO:0034404	nucleobase-containing small molecule biosynthetic process	-8.6	5.5	8.4	24156	227	370	19	5.1	1.1	226|229|2023|2026|2203|3091|3099|3939|5209|5210|5214|5230|5313|5315|7498|51085|54541|55526|55753	ALDOA|ALDOB|ENO1|ENO2|FBP1|HIF1A|HK2|LDHA|PFKFB3|PFKFB4|PFKP|PGK1|PKLR|PKM|XDH|MLXIPL|DDIT4|DHTKD1|OGDHL	-6.5	Input ID
GO-BP	19	GO:0006869	lipid transport	-8.6	4.3	7.9	24156	365	370	24	6.5	1.3	123|302|335|344|345|1579|2806|3685|4018|4363|5104|5244|5360|5444|5950|6554|6696|8529|10877|10998|11000|11001|11309|84647	PLIN2|ANXA2|APOA1|APOC2|APOC3|CYP4A11|GOT2|ITGAV|LPA|ABCC1|SERPINA5|ABCB4|PLTP|PON1|RBP4|SLC10A1|SPP1|CYP4F2|CFHR4|SLC27A5|SLC27A3|SLC27A2|SLCO2B1|PLA2G12B	-6.5	Input ID
GO-BP	19	GO:0006007	glucose catabolic process	-8.6	16	11	24156	36	370	9	2.4	0.8	226|229|2023|2026|3099|5214|5230|5313|5315	ALDOA|ALDOB|ENO1|ENO2|HK2|PFKP|PGK1|PKLR|PKM	-6.5	Input ID
GO-BP	19	GO:0062013	positive regulation of small molecule metabolic process	-8.6	6.7	8.9	24156	157	370	16	4.3	1.1	133|335|344|1581|2023|2822|3091|5209|5210|5230|7114|9104|51085|55022|84649|171425	ADM|APOA1|APOC2|CYP7A1|ENO1|GPLD1|HIF1A|PFKFB3|PFKFB4|PGK1|TMSB4X|RGN|MLXIPL|PID1|DGAT2|CLYBL	-6.5	Input ID
GO-BP	19	GO:0044070	regulation of anion transport	-8.5	8.7	9.5	24156	97	370	13	3.5	0.96	18|335|383|1579|5244|5621|5997|6529|6781|8529|8564|10991|27347	ABAT|APOA1|ARG1|CYP4A11|ABCB4|PRNP|RGS2|SLC6A1|STC1|CYP4F2|KMO|SLC38A3|STK39	-6.4	Input ID
GO-BP	19	GO:0009743	response to carbohydrate	-8.5	5.4	8.3	24156	231	370	19	5.1	1.1	847|1361|1581|2538|2822|2998|3091|3383|3673|3795|3939|3956|5106|5313|6529|6659|51085|55107|81035	CAT|CPB2|CYP7A1|G6PC|GPLD1|GYS2|HIF1A|ICAM1|ITGA2|KHK|LDHA|LGALS1|PCK2|PKLR|SLC6A1|SOX4|MLXIPL|ANO1|COLEC12	-6.4	Input ID
GO-BP	19	GO:0010035	response to inorganic substance	-8.4	3.5	7.4	24156	564	370	30	8.1	1.4	18|241|383|847|1373|2203|2353|2539|2822|3091|3162|3383|3725|3795|3939|4318|5066|5313|5444|5621|6279|6529|6898|7036|7128|8754|9104|9314|10397|23498	ABAT|ALOX5AP|ARG1|CAT|CPS1|FBP1|FOS|G6PD|GPLD1|HIF1A|HMOX1|ICAM1|JUN|KHK|LDHA|MMP9|PAM|PKLR|PON1|PRNP|S100A8|SLC6A1|TAT|TFR2|TNFAIP3|ADAM9|RGN|KLF4|NDRG1|HAAO	-6.3	Input ID
GO-BP	19	GO:0006720	isoprenoid metabolic process	-8.4	7	8.9	24156	140	370	15	4.1	1	124|335|344|345|1551|1559|1577|3158|5264|5950|7276|8608|59342|84649|285440	ADH1A|APOA1|APOC2|APOC3|CYP3A7|CYP2C9|CYP3A5|HMGCS2|PHYH|RBP4|TTR|RDH16|SCPEP1|DGAT2|CYP4V2	-6.3	Input ID
GO-BP	19	GO:0006721	terpenoid metabolic process	-8.3	7.6	9.1	24156	120	370	14	3.8	0.99	124|335|344|345|1551|1559|1577|3158|5950|7276|8608|59342|84649|285440	ADH1A|APOA1|APOC2|APOC3|CYP3A7|CYP2C9|CYP3A5|HMGCS2|RBP4|TTR|RDH16|SCPEP1|DGAT2|CYP4V2	-6.3	Input ID
GO-BP	19	GO:0044270	cellular nitrogen compound catabolic process	-8.2	3.1	7.1	24156	718	370	34	9.2	1.5	226|229|635|1577|1776|1807|1808|2023|2026|2203|3091|3099|3162|3939|5209|5210|5214|5230|5313|5315|7263|7498|7538|8564|9104|10643|10841|23498|29958|51085|51733|54541|55526|55753	ALDOA|ALDOB|BHMT|CYP3A5|DNASE1L3|DPYS|DPYSL2|ENO1|ENO2|FBP1|HIF1A|HK2|HMOX1|LDHA|PFKFB3|PFKFB4|PFKP|PGK1|PKLR|PKM|TST|XDH|ZFP36|KMO|RGN|IGF2BP3|FTCD|HAAO|DMGDH|MLXIPL|UPB1|DDIT4|DHTKD1|OGDHL	-6.1	Input ID
GO-BP	19	GO:0015718	monocarboxylic acid transport	-8.1	6.2	8.4	24156	169	370	16	4.3	1.1	18|123|1579|2806|5244|6529|6535|6554|6567|8529|10991|10998|11000|11001|11309|84647	ABAT|PLIN2|CYP4A11|GOT2|ABCB4|SLC6A1|SLC6A8|SLC10A1|SLC16A2|CYP4F2|SLC38A3|SLC27A5|SLC27A3|SLC27A2|SLCO2B1|PLA2G12B	-6	Input ID
GO-BP	19	GO:0031638	zymogen activation	-8.1	12	10	24156	54	370	10	2.7	0.84	1361|2023|2158|2160|2161|3818|5054|5230|5270|5345	CPB2|ENO1|F9|F11|F12|KLKB1|SERPINE1|PGK1|SERPINE2|SERPINF2	-6	Input ID
GO-BP	19	GO:0010755	regulation of plasminogen activation	-8	33	14	24156	12	370	6	1.6	0.66	1361|2023|2161|5054|5270|5345	CPB2|ENO1|F12|SERPINE1|SERPINE2|SERPINF2	-5.9	Input ID
GO-BP	19	GO:0060326	cell chemotaxis	-7.9	4.5	7.7	24156	304	370	21	5.7	1.2	728|1839|1880|2155|2207|3273|3570|4015|4363|4851|5054|6279|6280|6291|6364|6370|6372|6374|7114|7852|27347	C5AR1|HBEGF|GPR183|F7|FCER1G|HRG|IL6R|LOX|ABCC1|NOTCH1|SERPINE1|S100A8|S100A9|SAA4|CCL20|CCL25|CXCL6|CXCL5|TMSB4X|CXCR4|STK39	-5.9	Input ID
GO-BP	19	GO:0006734	NADH metabolic process	-7.9	14	11	24156	42	370	9	2.4	0.8	226|229|2023|2026|3099|5214|5230|5313|5315	ALDOA|ALDOB|ENO1|ENO2|HK2|PFKP|PGK1|PKLR|PKM	-5.9	Input ID
GO-BP	19	GO:1901137	carbohydrate derivative biosynthetic process	-7.9	3	6.9	24156	774	370	35	9.5	1.5	226|229|1462|1839|2023|2026|2203|2539|3091|3099|3939|5209|5210|5214|5230|5313|5315|5352|5538|6319|7086|7114|7923|9245|22822|25825|51084|51085|53354|54541|55022|55526|55753|84002|143888	ALDOA|ALDOB|VCAN|HBEGF|ENO1|ENO2|FBP1|G6PD|HIF1A|HK2|LDHA|PFKFB3|PFKFB4|PFKP|PGK1|PKLR|PKM|PLOD2|PPT1|SCD|TKT|TMSB4X|HSD17B8|GCNT3|PHLDA1|BACE2|CRYL1|MLXIPL|PANK1|DDIT4|PID1|DHTKD1|OGDHL|B3GNT5|POGLUT3	-5.9	Input ID
GO-BP	19	GO:0051604	protein maturation	-7.9	4	7.4	24156	396	370	24	6.5	1.3	714|728|729|732|1361|2023|2155|2158|2160|2161|3818|5054|5230|5270|5345|5552|5621|6659|7036|10877|11326|25825|30001|148738	C1QC|C5AR1|C6|C8B|CPB2|ENO1|F7|F9|F11|F12|KLKB1|SERPINE1|PGK1|SERPINE2|SERPINF2|SRGN|PRNP|SOX4|TFR2|CFHR4|VSIG4|BACE2|ERO1A|HJV	-5.9	Input ID
GO-BP	19	GO:0009636	response to toxic substance	-7.8	3.4	7.1	24156	533	370	28	7.6	1.4	18|241|383|670|847|1373|2052|2353|2538|2539|2806|3162|3383|3725|3939|5444|5446|5950|5997|6279|6280|6529|7097|7128|8754|9104|9314|10400	ABAT|ALOX5AP|ARG1|BPHL|CAT|CPS1|EPHX1|FOS|G6PC|G6PD|GOT2|HMOX1|ICAM1|JUN|LDHA|PON1|PON3|RBP4|RGS2|S100A8|S100A9|SLC6A1|TLR2|TNFAIP3|ADAM9|RGN|KLF4|PEMT	-5.7	Input ID
GO-BP	19	GO:1901652	response to peptide	-7.7	3.4	7.1	24156	534	370	28	7.6	1.4	133|383|847|1373|2155|2538|2806|2822|3383|3795|4318|4321|4363|4851|5106|5313|5315|5621|6513|7097|7128|9314|9518|11031|23433|28999|55022|55107	ADM|ARG1|CAT|CPS1|F7|G6PC|GOT2|GPLD1|ICAM1|KHK|MMP9|MMP12|ABCC1|NOTCH1|PCK2|PKLR|PKM|PRNP|SLC2A1|TLR2|TNFAIP3|KLF4|GDF15|RAB31|RHOQ|KLF15|PID1|ANO1	-5.7	Input ID
GO-BP	19	GO:0030198	extracellular matrix organization	-7.7	4	7.3	24156	373	370	23	6.2	1.3	960|1361|1462|3383|3491|3673|3685|3818|3912|4015|4312|4316|4318|4321|4851|5054|5340|5345|5768|6696|7276|30001|164656	CD44|CPB2|VCAN|ICAM1|CCN1|ITGA2|ITGAV|KLKB1|LAMB1|LOX|MMP1|MMP7|MMP9|MMP12|NOTCH1|SERPINE1|PLG|SERPINF2|QSOX1|SPP1|TTR|ERO1A|TMPRSS6	-5.7	Input ID
GO-BP	19	GO:0055088	lipid homeostasis	-7.7	6.3	8.2	24156	156	370	15	4.1	1	335|344|345|1581|2538|5244|8309|8856|9970|29116|51085|84647|84649|123876|100133941	APOA1|APOC2|APOC3|CYP7A1|G6PC|ABCB4|ACOX2|NR1I2|NR1I3|MYLIP|MLXIPL|PLA2G12B|DGAT2|ACSM2A|CD24	-5.7	Input ID
GO-BP	19	GO:0062012	regulation of small molecule metabolic process	-7.7	3.6	7.1	24156	469	370	26	7	1.3	133|335|344|345|635|1581|2023|2203|2822|3091|3486|3795|5209|5210|5230|6319|7108|7114|9056|9104|27232|51085|54541|55022|84649|171425	ADM|APOA1|APOC2|APOC3|BHMT|CYP7A1|ENO1|FBP1|GPLD1|HIF1A|IGFBP3|KHK|PFKFB3|PFKFB4|PGK1|SCD|TM7SF2|TMSB4X|SLC7A7|RGN|GNMT|MLXIPL|DDIT4|PID1|DGAT2|CLYBL	-5.7	Input ID
GO-BP	19	GO:0010817	regulation of hormone levels	-7.7	3.4	7	24156	537	370	28	7.6	1.4	18|124|133|335|866|1551|1559|1577|1593|2822|3091|5446|5950|6513|6514|6567|6580|6659|6696|6718|7036|7276|7923|8608|25825|55107|59342|84649	ABAT|ADH1A|ADM|APOA1|SERPINA6|CYP3A7|CYP2C9|CYP3A5|CYP27A1|GPLD1|HIF1A|PON3|RBP4|SLC2A1|SLC2A2|SLC16A2|SLC22A1|SOX4|SPP1|AKR1D1|TFR2|TTR|HSD17B8|RDH16|BACE2|ANO1|SCPEP1|DGAT2	-5.7	Input ID
GO-BP	19	GO:0046700	heterocycle catabolic process	-7.6	3	6.8	24156	717	370	33	8.9	1.5	226|229|1548|1610|1776|1807|1808|2023|2026|2203|3091|3099|3162|3939|5209|5210|5214|5230|5313|5315|5446|7498|7538|8564|9104|10643|10841|23498|51085|51733|54541|55526|55753	ALDOA|ALDOB|CYP2A6|DAO|DNASE1L3|DPYS|DPYSL2|ENO1|ENO2|FBP1|HIF1A|HK2|HMOX1|LDHA|PFKFB3|PFKFB4|PFKP|PGK1|PKLR|PKM|PON3|XDH|ZFP36|KMO|RGN|IGF2BP3|FTCD|HAAO|MLXIPL|UPB1|DDIT4|DHTKD1|OGDHL	-5.6	Input ID
GO-BP	19	GO:1903317	regulation of protein maturation	-7.6	5.7	8	24156	182	370	16	4.3	1.1	714|728|729|732|1361|2023|2161|3818|5054|5270|5345|5621|6659|7036|10877|11326	C1QC|C5AR1|C6|C8B|CPB2|ENO1|F12|KLKB1|SERPINE1|SERPINE2|SERPINF2|PRNP|SOX4|TFR2|CFHR4|VSIG4	-5.6	Input ID
GO-BP	19	GO:0006575	cellular modified amino acid metabolic process	-7.6	5.3	7.8	24156	208	370	17	4.6	1.1	635|2539|2593|2806|3029|5352|6535|6567|7915|8875|10400|10841|27232|29958|30001|51268|112399	BHMT|G6PD|GAMT|GOT2|HAGH|PLOD2|SLC6A8|SLC16A2|ALDH5A1|VNN2|PEMT|FTCD|GNMT|DMGDH|ERO1A|PIPOX|EGLN3	-5.6	Input ID
GO-BP	19	GO:0050727	regulation of inflammatory response	-7.6	3.5	7	24156	508	370	27	7.3	1.4	335|714|728|729|732|1075|1361|1776|2161|2207|3673|3818|4318|4363|5054|5624|6279|6280|7097|7114|7128|9180|9314|10877|11326|27347|114770	APOA1|C1QC|C5AR1|C6|C8B|CTSC|CPB2|DNASE1L3|F12|FCER1G|ITGA2|KLKB1|MMP9|ABCC1|SERPINE1|PROC|S100A8|S100A9|TLR2|TMSB4X|TNFAIP3|OSMR|KLF4|CFHR4|VSIG4|STK39|PGLYRP2	-5.6	Input ID
GO-BP	19	GO:0016485	protein processing	-7.4	4.2	7.2	24156	327	370	21	5.7	1.2	714|728|729|732|1361|2023|2155|2158|2160|2161|3818|5054|5230|5270|5345|5552|5621|10877|11326|25825|148738	C1QC|C5AR1|C6|C8B|CPB2|ENO1|F7|F9|F11|F12|KLKB1|SERPINE1|PGK1|SERPINE2|SERPINF2|SRGN|PRNP|CFHR4|VSIG4|BACE2|HJV	-5.4	Input ID
GO-BP	19	GO:0002237	response to molecule of bacterial origin	-7.4	4	7.2	24156	358	370	22	5.9	1.2	133|383|728|1373|2353|3383|3725|4851|5054|6279|6372|6374|7097|7128|7538|8564|8754|8856|9970|23643|84868|100133941	ADM|ARG1|C5AR1|CPS1|FOS|ICAM1|JUN|NOTCH1|SERPINE1|S100A8|CXCL6|CXCL5|TLR2|TNFAIP3|ZFP36|KMO|ADAM9|NR1I2|NR1I3|LY96|HAVCR2|CD24	-5.4	Input ID
GO-BP	19	GO:0044242	cellular lipid catabolic process	-7.4	5.1	7.6	24156	216	370	17	4.6	1.1	335|344|345|427|1373|1579|1962|2822|4051|4594|5106|5264|5538|8309|8529|11001|55268	APOA1|APOC2|APOC3|ASAH1|CPS1|CYP4A11|EHHADH|GPLD1|CYP4F3|MMUT|PCK2|PHYH|PPT1|ACOX2|CYP4F2|SLC27A2|ECHDC2	-5.4	Input ID
GO-BP	19	GO:0010942	positive regulation of cell death	-7.3	2.9	6.6	24156	739	370	33	8.9	1.5	133|467|665|1075|1649|1687|1848|2353|2822|3162|3273|3486|3491|3725|3827|3939|4318|4851|5329|5621|6279|6280|6659|7305|7498|8309|8564|9240|22822|22943|29948|54541|112399	ADM|ATF3|BNIP3L|CTSC|DDIT3|GSDME|DUSP6|FOS|GPLD1|HMOX1|HRG|IGFBP3|CCN1|JUN|KNG1|LDHA|MMP9|NOTCH1|PLAUR|PRNP|S100A8|S100A9|SOX4|TYROBP|XDH|ACOX2|KMO|PNMA1|PHLDA1|DKK1|OSGIN1|DDIT4|EGLN3	-5.3	Input ID
GO-BP	19	GO:0051919	positive regulation of fibrinolysis	-7.3	65	16	24156	4	370	4	1.1	0.54	2160|2161|3818|5340	F11|F12|KLKB1|PLG	-5.3	Input ID
GO-BP	19	GO:0009205	purine ribonucleoside triphosphate metabolic process	-7.2	4.1	7.1	24156	335	370	21	5.7	1.2	226|229|2023|2026|2203|3091|3099|3939|5209|5210|5214|5230|5313|5315|7114|23433|51085|54541|55022|55526|55753	ALDOA|ALDOB|ENO1|ENO2|FBP1|HIF1A|HK2|LDHA|PFKFB3|PFKFB4|PFKP|PGK1|PKLR|PKM|TMSB4X|RHOQ|MLXIPL|DDIT4|PID1|DHTKD1|OGDHL	-5.2	Input ID
GO-BP	19	GO:0046034	ATP metabolic process	-7.2	4.3	7.2	24156	306	370	20	5.4	1.2	226|229|2023|2026|2203|3091|3099|3939|5209|5210|5214|5230|5313|5315|7114|51085|54541|55022|55526|55753	ALDOA|ALDOB|ENO1|ENO2|FBP1|HIF1A|HK2|LDHA|PFKFB3|PFKFB4|PFKP|PGK1|PKLR|PKM|TMSB4X|MLXIPL|DDIT4|PID1|DHTKD1|OGDHL	-5.2	Input ID
GO-BP	19	GO:0006641	triglyceride metabolic process	-7.2	7.5	8.3	24156	104	370	12	3.2	0.92	335|344|345|847|1373|2538|2822|5106|9104|10998|80168|84649	APOA1|APOC2|APOC3|CAT|CPS1|G6PC|GPLD1|PCK2|RGN|SLC27A5|MOGAT2|DGAT2	-5.2	Input ID
GO-BP	19	GO:0001523	retinoid metabolic process	-7.2	7.5	8.3	24156	104	370	12	3.2	0.92	124|335|344|345|1551|1577|5950|7276|8608|59342|84649|285440	ADH1A|APOA1|APOC2|APOC3|CYP3A7|CYP3A5|RBP4|TTR|RDH16|SCPEP1|DGAT2|CYP4V2	-5.2	Input ID
GO-BP	19	GO:0032496	response to lipopolysaccharide	-7.2	4.1	7.1	24156	338	370	21	5.7	1.2	133|383|728|1373|2353|3383|3725|4851|5054|6279|6372|6374|7097|7128|7538|8564|8754|8856|9970|23643|84868	ADM|ARG1|C5AR1|CPS1|FOS|ICAM1|JUN|NOTCH1|SERPINE1|S100A8|CXCL6|CXCL5|TLR2|TNFAIP3|ZFP36|KMO|ADAM9|NR1I2|NR1I3|LY96|HAVCR2	-5.2	Input ID
GO-BP	19	GO:0009199	ribonucleoside triphosphate metabolic process	-7.1	4	7	24156	341	370	21	5.7	1.2	226|229|2023|2026|2203|3091|3099|3939|5209|5210|5214|5230|5313|5315|7114|23433|51085|54541|55022|55526|55753	ALDOA|ALDOB|ENO1|ENO2|FBP1|HIF1A|HK2|LDHA|PFKFB3|PFKFB4|PFKP|PGK1|PKLR|PKM|TMSB4X|RHOQ|MLXIPL|DDIT4|PID1|DHTKD1|OGDHL	-5.1	Input ID
GO-BP	19	GO:0009144	purine nucleoside triphosphate metabolic process	-7.1	4	7	24156	342	370	21	5.7	1.2	226|229|2023|2026|2203|3091|3099|3939|5209|5210|5214|5230|5313|5315|7114|23433|51085|54541|55022|55526|55753	ALDOA|ALDOB|ENO1|ENO2|FBP1|HIF1A|HK2|LDHA|PFKFB3|PFKFB4|PFKP|PGK1|PKLR|PKM|TMSB4X|RHOQ|MLXIPL|DDIT4|PID1|DHTKD1|OGDHL	-5.1	Input ID
GO-BP	19	GO:0006935	chemotaxis	-7	3	6.5	24156	649	370	30	8.1	1.4	335|728|1808|1839|1880|2041|2155|2207|3273|3491|3570|3673|3685|3950|4015|4363|4851|5054|5329|6279|6280|6291|6364|6370|6372|6374|7114|7852|10457|27347	APOA1|C5AR1|DPYSL2|HBEGF|GPR183|EPHA1|F7|FCER1G|HRG|CCN1|IL6R|ITGA2|ITGAV|LECT2|LOX|ABCC1|NOTCH1|SERPINE1|PLAUR|S100A8|S100A9|SAA4|CCL20|CCL25|CXCL6|CXCL5|TMSB4X|CXCR4|GPNMB|STK39	-5.1	Input ID
GO-BP	19	GO:0006638	neutral lipid metabolic process	-7	6.6	7.9	24156	129	370	13	3.5	0.96	283|335|344|345|847|1373|2538|2822|5106|9104|10998|80168|84649	ANG|APOA1|APOC2|APOC3|CAT|CPS1|G6PC|GPLD1|PCK2|RGN|SLC27A5|MOGAT2|DGAT2	-5	Input ID
GO-BP	19	GO:0006639	acylglycerol metabolic process	-7	6.6	7.9	24156	129	370	13	3.5	0.96	283|335|344|345|847|1373|2538|2822|5106|9104|10998|80168|84649	ANG|APOA1|APOC2|APOC3|CAT|CPS1|G6PC|GPLD1|PCK2|RGN|SLC27A5|MOGAT2|DGAT2	-5	Input ID
GO-BP	19	GO:0042330	taxis	-7	3	6.5	24156	651	370	30	8.1	1.4	335|728|1808|1839|1880|2041|2155|2207|3273|3491|3570|3673|3685|3950|4015|4363|4851|5054|5329|6279|6280|6291|6364|6370|6372|6374|7114|7852|10457|27347	APOA1|C5AR1|DPYSL2|HBEGF|GPR183|EPHA1|F7|FCER1G|HRG|CCN1|IL6R|ITGA2|ITGAV|LECT2|LOX|ABCC1|NOTCH1|SERPINE1|PLAUR|S100A8|S100A9|SAA4|CCL20|CCL25|CXCL6|CXCL5|TMSB4X|CXCR4|GPNMB|STK39	-5	Input ID
GO-BP	19	GO:0034754	cellular hormone metabolic process	-7	6.5	7.9	24156	130	370	13	3.5	0.96	124|133|1551|1559|1577|5950|6696|6718|7276|7923|8608|59342|84649	ADH1A|ADM|CYP3A7|CYP2C9|CYP3A5|RBP4|SPP1|AKR1D1|TTR|HSD17B8|RDH16|SCPEP1|DGAT2	-5	Input ID
GO-BP	19	GO:0009617	response to bacterium	-7	2.9	6.4	24156	729	370	32	8.6	1.5	133|383|728|1373|2207|2353|3383|3570|3725|4069|4851|5054|5272|5996|6279|6280|6364|6372|6374|7097|7128|7538|8564|8754|8856|9970|23643|81035|84868|114770|653808|100133941	ADM|ARG1|C5AR1|CPS1|FCER1G|FOS|ICAM1|IL6R|JUN|LYZ|NOTCH1|SERPINE1|SERPINB9|RGS1|S100A8|S100A9|CCL20|CXCL6|CXCL5|TLR2|TNFAIP3|ZFP36|KMO|ADAM9|NR1I2|NR1I3|LY96|COLEC12|HAVCR2|PGLYRP2|ZG16|CD24	-5	Input ID
GO-BP	19	GO:0071466	cellular response to xenobiotic stimulus	-6.9	5.5	7.5	24156	179	370	15	4.1	1	383|670|1548|1549|1551|1559|1577|2052|3383|5106|5446|8824|8856|54541|348158	ARG1|BPHL|CYP2A6|CYP2A7|CYP3A7|CYP2C9|CYP3A5|EPHX1|ICAM1|PCK2|PON3|CES2|NR1I2|DDIT4|ACSM2B	-5	Input ID
GO-BP	19	GO:0034284	response to monosaccharide	-6.9	5.1	7.3	24156	205	370	16	4.3	1.1	847|1361|1581|2822|2998|3091|3383|3673|3795|3939|3956|5106|5313|6659|51085|55107	CAT|CPB2|CYP7A1|GPLD1|GYS2|HIF1A|ICAM1|ITGA2|KHK|LDHA|LGALS1|PCK2|PKLR|SOX4|MLXIPL|ANO1	-4.9	Input ID
GO-BP	19	GO:1900048	positive regulation of hemostasis	-6.9	17	10	24156	27	370	7	1.9	0.71	1361|2155|2161|3273|5054|5340|5345	CPB2|F7|F12|HRG|SERPINE1|PLG|SERPINF2	-4.9	Input ID
GO-BP	19	GO:0072378	blood coagulation, fibrin clot formation	-6.9	17	10	24156	27	370	7	1.9	0.71	462|2155|2158|2160|2161|3818|3827	SERPINC1|F7|F9|F11|F12|KLKB1|KNG1	-4.9	Input ID
GO-BP	19	GO:0030194	positive regulation of blood coagulation	-6.9	17	10	24156	27	370	7	1.9	0.71	1361|2155|2161|3273|5054|5340|5345	CPB2|F7|F12|HRG|SERPINE1|PLG|SERPINF2	-4.9	Input ID
GO-BP	19	GO:0016101	diterpenoid metabolic process	-6.9	7.1	8	24156	110	370	12	3.2	0.92	124|335|344|345|1551|1577|5950|7276|8608|59342|84649|285440	ADH1A|APOA1|APOC2|APOC3|CYP3A7|CYP3A5|RBP4|TTR|RDH16|SCPEP1|DGAT2|CYP4V2	-4.9	Input ID
GO-BP	19	GO:0007162	negative regulation of cell adhesion	-6.8	4.2	6.9	24156	294	370	19	5.1	1.1	18|335|383|3273|3827|3956|4321|4851|5054|5270|5340|5621|6370|9314|10457|11326|23603|27242|84868	ABAT|APOA1|ARG1|HRG|KNG1|LGALS1|MMP12|NOTCH1|SERPINE1|SERPINE2|PLG|PRNP|CCL25|KLF4|GPNMB|VSIG4|CORO1C|TNFRSF21|HAVCR2	-4.8	Input ID
GO-BP	19	GO:0050820	positive regulation of coagulation	-6.8	16	10	24156	28	370	7	1.9	0.71	1361|2155|2161|3273|5054|5340|5345	CPB2|F7|F12|HRG|SERPINE1|PLG|SERPINF2	-4.8	Input ID
GO-BP	19	GO:0030335	positive regulation of cell migration	-6.7	3.1	6.4	24156	560	370	27	7.3	1.4	728|1601|1839|2041|2155|2822|3091|3162|3383|3491|3570|3673|3685|3725|3912|4318|4739|4851|5054|6282|6364|7114|7852|8754|10457|22919|27347	C5AR1|DAB2|HBEGF|EPHA1|F7|GPLD1|HIF1A|HMOX1|ICAM1|CCN1|IL6R|ITGA2|ITGAV|JUN|LAMB1|MMP9|NEDD9|NOTCH1|SERPINE1|S100A11|CCL20|TMSB4X|CXCR4|ADAM9|GPNMB|MAPRE1|STK39	-4.8	Input ID
GO-BP	19	GO:0051918	negative regulation of fibrinolysis	-6.7	33	12	24156	10	370	5	1.4	0.6	1361|3273|5054|5340|5345	CPB2|HRG|SERPINE1|PLG|SERPINF2	-4.8	Input ID
GO-BP	19	GO:0007597	blood coagulation, intrinsic pathway	-6.7	22	11	24156	18	370	6	1.6	0.66	462|2158|2160|2161|3818|3827	SERPINC1|F9|F11|F12|KLKB1|KNG1	-4.8	Input ID
GO-BP	19	GO:0006633	fatty acid biosynthetic process	-6.7	5.6	7.4	24156	162	370	14	3.8	0.99	241|335|344|345|1559|1579|1581|6319|7923|9104|51085|54988|123876|348158	ALOX5AP|APOA1|APOC2|APOC3|CYP2C9|CYP4A11|CYP7A1|SCD|HSD17B8|RGN|MLXIPL|ACSM5|ACSM2A|ACSM2B	-4.7	Input ID
GO-BP	19	GO:0009141	nucleoside triphosphate metabolic process	-6.7	3.8	6.7	24156	362	370	21	5.7	1.2	226|229|2023|2026|2203|3091|3099|3939|5209|5210|5214|5230|5313|5315|7114|23433|51085|54541|55022|55526|55753	ALDOA|ALDOB|ENO1|ENO2|FBP1|HIF1A|HK2|LDHA|PFKFB3|PFKFB4|PFKP|PGK1|PKLR|PKM|TMSB4X|RHOQ|MLXIPL|DDIT4|PID1|DHTKD1|OGDHL	-4.7	Input ID
GO-BP	19	GO:0031960	response to corticosteroid	-6.6	5.6	7.4	24156	163	370	14	3.8	0.99	133|189|383|1373|2353|3383|4851|5066|5106|6781|6898|7538|8754|54541	ADM|AGXT|ARG1|CPS1|FOS|ICAM1|NOTCH1|PAM|PCK2|STC1|TAT|ZFP36|ADAM9|DDIT4	-4.7	Input ID
GO-BP	19	GO:0030155	regulation of cell adhesion	-6.6	2.8	6.2	24156	716	370	31	8.4	1.4	18|335|383|960|2041|3273|3383|3491|3673|3685|3827|3956|4321|4739|4851|5054|5270|5329|5340|5345|5621|6370|7852|8754|9314|10457|11326|23603|27242|84868|100133941	ABAT|APOA1|ARG1|CD44|EPHA1|HRG|ICAM1|CCN1|ITGA2|ITGAV|KNG1|LGALS1|MMP12|NEDD9|NOTCH1|SERPINE1|SERPINE2|PLAUR|PLG|SERPINF2|PRNP|CCL25|CXCR4|ADAM9|KLF4|GPNMB|VSIG4|CORO1C|TNFRSF21|HAVCR2|CD24	-4.7	Input ID
GO-BP	19	GO:0009064	glutamine family amino acid metabolic process	-6.6	8.6	8.3	24156	76	370	10	2.7	0.84	383|1373|1610|2806|6898|7915|9056|10841|27165|137872	ARG1|CPS1|DAO|GOT2|TAT|ALDH5A1|SLC7A7|FTCD|GLS2|ADHFE1	-4.7	Input ID
GO-BP	19	GO:0032890	regulation of organic acid transport	-6.6	10	8.6	24156	59	370	9	2.4	0.8	18|383|1579|5997|6529|8529|8564|10991|27347	ABAT|ARG1|CYP4A11|RGS2|SLC6A1|CYP4F2|KMO|SLC38A3|STK39	-4.6	Input ID
GO-BP	19	GO:0006690	icosanoid metabolic process	-6.5	6.6	7.6	24156	119	370	12	3.2	0.92	241|1548|1549|1559|1579|4051|4363|5444|5446|7097|8529|8824	ALOX5AP|CYP2A6|CYP2A7|CYP2C9|CYP4A11|CYP4F3|ABCC1|PON1|PON3|TLR2|CYP4F2|CES2	-4.6	Input ID
GO-BP	19	GO:0042632	cholesterol homeostasis	-6.4	7.3	7.8	24156	99	370	11	3	0.88	335|344|345|1581|2538|8856|9970|29116|84647|84649|100133941	APOA1|APOC2|APOC3|CYP7A1|G6PC|NR1I2|NR1I3|MYLIP|PLA2G12B|DGAT2|CD24	-4.5	Input ID
GO-BP	19	GO:0006790	sulfur compound metabolic process	-6.4	3.7	6.5	24156	373	370	21	5.7	1.2	189|635|1373|1462|2539|3029|3158|4143|4594|5538|6319|7263|7915|7923|10400|27232|51268|54988|84649|123876|348158	AGXT|BHMT|CPS1|VCAN|G6PD|HAGH|HMGCS2|MAT1A|MMUT|PPT1|SCD|TST|ALDH5A1|HSD17B8|PEMT|GNMT|PIPOX|ACSM5|DGAT2|ACSM2A|ACSM2B	-4.5	Input ID
GO-BP	19	GO:0006066	alcohol metabolic process	-6.4	3.7	6.5	24156	374	370	21	5.7	1.2	124|335|427|847|1551|1559|1577|1581|1593|2539|3158|5106|5444|5950|6319|6718|7108|7276|8608|80168|84649	ADH1A|APOA1|ASAH1|CAT|CYP3A7|CYP2C9|CYP3A5|CYP7A1|CYP27A1|G6PD|HMGCS2|PCK2|PON1|RBP4|SCD|AKR1D1|TM7SF2|TTR|RDH16|MOGAT2|DGAT2	-4.5	Input ID
GO-BP	19	GO:0009167	purine ribonucleoside monophosphate metabolic process	-6.4	3.8	6.5	24156	342	370	20	5.4	1.2	226|229|2023|2026|2203|3091|3099|3939|5209|5210|5214|5230|5313|5315|7114|51085|54541|55022|55526|55753	ALDOA|ALDOB|ENO1|ENO2|FBP1|HIF1A|HK2|LDHA|PFKFB3|PFKFB4|PFKP|PGK1|PKLR|PKM|TMSB4X|MLXIPL|DDIT4|PID1|DHTKD1|OGDHL	-4.5	Input ID
GO-BP	19	GO:0055092	sterol homeostasis	-6.4	7.2	7.7	24156	100	370	11	3	0.88	335|344|345|1581|2538|8856|9970|29116|84647|84649|100133941	APOA1|APOC2|APOC3|CYP7A1|G6PC|NR1I2|NR1I3|MYLIP|PLA2G12B|DGAT2|CD24	-4.5	Input ID
GO-BP	19	GO:0009126	purine nucleoside monophosphate metabolic process	-6.4	3.8	6.5	24156	343	370	20	5.4	1.2	226|229|2023|2026|2203|3091|3099|3939|5209|5210|5214|5230|5313|5315|7114|51085|54541|55022|55526|55753	ALDOA|ALDOB|ENO1|ENO2|FBP1|HIF1A|HK2|LDHA|PFKFB3|PFKFB4|PFKP|PGK1|PKLR|PKM|TMSB4X|MLXIPL|DDIT4|PID1|DHTKD1|OGDHL	-4.5	Input ID
GO-BP	19	GO:0044706	multi-multicellular organism process	-6.4	4.7	6.9	24156	224	370	16	4.3	1.1	133|383|2353|2806|3673|4316|4318|5066|5270|5997|6513|6696|6781|10991|23764|84868	ADM|ARG1|FOS|GOT2|ITGA2|MMP7|MMP9|PAM|SERPINE2|RGS2|SLC2A1|SPP1|STC1|SLC38A3|MAFF|HAVCR2	-4.5	Input ID
GO-BP	19	GO:2000147	positive regulation of cell motility	-6.4	3	6.2	24156	584	370	27	7.3	1.4	728|1601|1839|2041|2155|2822|3091|3162|3383|3491|3570|3673|3685|3725|3912|4318|4739|4851|5054|6282|6364|7114|7852|8754|10457|22919|27347	C5AR1|DAB2|HBEGF|EPHA1|F7|GPLD1|HIF1A|HMOX1|ICAM1|CCN1|IL6R|ITGA2|ITGAV|JUN|LAMB1|MMP9|NEDD9|NOTCH1|SERPINE1|S100A11|CCL20|TMSB4X|CXCR4|ADAM9|GPNMB|MAPRE1|STK39	-4.5	Input ID
GO-BP	19	GO:0051384	response to glucocorticoid	-6.4	5.8	7.3	24156	146	370	13	3.5	0.96	133|189|383|1373|2353|3383|5066|5106|6781|6898|7538|8754|54541	ADM|AGXT|ARG1|CPS1|FOS|ICAM1|PAM|PCK2|STC1|TAT|ZFP36|ADAM9|DDIT4	-4.5	Input ID
GO-BP	19	GO:0031099	regeneration	-6.3	4.9	6.9	24156	199	370	15	4.1	1	133|335|728|1361|2155|3162|3725|4851|5315|5340|5738|6696|7104|9104|9314	ADM|APOA1|C5AR1|CPB2|F7|HMOX1|JUN|NOTCH1|PKM|PLG|PTGFRN|SPP1|TM4SF4|RGN|KLF4	-4.4	Input ID
GO-BP	19	GO:0097006	regulation of plasma lipoprotein particle levels	-6.3	7	7.6	24156	102	370	11	3	0.88	302|335|344|345|2822|3162|4018|5360|5444|29116|84649	ANXA2|APOA1|APOC2|APOC3|GPLD1|HMOX1|LPA|PLTP|PON1|MYLIP|DGAT2	-4.4	Input ID
GO-BP	19	GO:0072376	protein activation cascade	-6.3	4.9	6.9	24156	201	370	15	4.1	1	462|714|728|729|732|1361|2155|2158|2160|2161|3818|3827|10747|10877|11326	SERPINC1|C1QC|C5AR1|C6|C8B|CPB2|F7|F9|F11|F12|KLKB1|KNG1|MASP2|CFHR4|VSIG4	-4.4	Input ID
GO-BP	19	GO:0044262	cellular carbohydrate metabolic process	-6.2	4.1	6.6	24156	288	370	18	4.9	1.1	2203|2538|2822|2998|3099|3486|3795|5106|5209|5210|5502|6513|9104|27232|54541|80168|84002|84649	FBP1|G6PC|GPLD1|GYS2|HK2|IGFBP3|KHK|PCK2|PFKFB3|PFKFB4|PPP1R1A|SLC2A1|RGN|GNMT|DDIT4|MOGAT2|B3GNT5|DGAT2	-4.3	Input ID
GO-BP	19	GO:0051955	regulation of amino acid transport	-6.2	14	9.2	24156	33	370	7	1.9	0.71	18|383|5997|6529|8564|10991|27347	ABAT|ARG1|RGS2|SLC6A1|KMO|SLC38A3|STK39	-4.3	Input ID
GO-BP	19	GO:0008652	cellular amino acid biosynthetic process	-6.2	7.9	7.8	24156	83	370	10	2.7	0.84	18|189|586|635|1373|2593|2806|5352|27165|51733	ABAT|AGXT|BCAT1|BHMT|CPS1|GAMT|GOT2|PLOD2|GLS2|UPB1	-4.3	Input ID
GO-BP	19	GO:0006694	steroid biosynthetic process	-6.2	4.8	6.8	24156	202	370	15	4.1	1	133|335|427|1551|1581|1593|2539|3158|6319|6718|7108|7923|8309|10998|11001	ADM|APOA1|ASAH1|CYP3A7|CYP7A1|CYP27A1|G6PD|HMGCS2|SCD|AKR1D1|TM7SF2|HSD17B8|ACOX2|SLC27A5|SLC27A2	-4.3	Input ID
GO-BP	19	GO:0046890	regulation of lipid biosynthetic process	-6.2	4.8	6.8	24156	202	370	15	4.1	1	133|335|344|345|427|1581|2822|3491|6319|7108|9104|51085|79888|84649|345275	ADM|APOA1|APOC2|APOC3|ASAH1|CYP7A1|GPLD1|CCN1|SCD|TM7SF2|RGN|MLXIPL|LPCAT1|DGAT2|HSD17B13	-4.3	Input ID
GO-BP	19	GO:0019216	regulation of lipid metabolic process	-6.2	3.4	6.3	24156	417	370	22	5.9	1.2	123|133|335|344|345|427|1579|1581|2822|3158|3491|5244|6319|7108|9104|9314|27242|51085|51280|79888|84649|345275	PLIN2|ADM|APOA1|APOC2|APOC3|ASAH1|CYP4A11|CYP7A1|GPLD1|HMGCS2|CCN1|ABCB4|SCD|TM7SF2|RGN|KLF4|TNFRSF21|MLXIPL|GOLM1|LPCAT1|DGAT2|HSD17B13	-4.3	Input ID
GO-BP	19	GO:1903580	positive regulation of ATP metabolic process	-6.2	11	8.5	24156	48	370	8	2.2	0.76	2023|3091|5209|5210|5230|7114|51085|55022	ENO1|HIF1A|PFKFB3|PFKFB4|PGK1|TMSB4X|MLXIPL|PID1	-4.3	Input ID
GO-BP	19	GO:0046889	positive regulation of lipid biosynthetic process	-6.1	7.7	7.7	24156	85	370	10	2.7	0.84	133|335|344|1581|2822|3491|9104|51085|84649|345275	ADM|APOA1|APOC2|CYP7A1|GPLD1|CCN1|RGN|MLXIPL|DGAT2|HSD17B13	-4.3	Input ID
GO-BP	19	GO:0009161	ribonucleoside monophosphate metabolic process	-6.1	3.7	6.3	24156	356	370	20	5.4	1.2	226|229|2023|2026|2203|3091|3099|3939|5209|5210|5214|5230|5313|5315|7114|51085|54541|55022|55526|55753	ALDOA|ALDOB|ENO1|ENO2|FBP1|HIF1A|HK2|LDHA|PFKFB3|PFKFB4|PFKP|PGK1|PKLR|PKM|TMSB4X|MLXIPL|DDIT4|PID1|DHTKD1|OGDHL	-4.3	Input ID
GO-BP	19	GO:0006865	amino acid transport	-6.1	5.5	7	24156	153	370	13	3.5	0.96	18|383|5997|6510|6529|6535|8564|9056|10166|10991|27165|27347|81539	ABAT|ARG1|RGS2|SLC1A5|SLC6A1|SLC6A8|KMO|SLC7A7|SLC25A15|SLC38A3|GLS2|STK39|SLC38A1	-4.3	Input ID
GO-BP	19	GO:0051272	positive regulation of cellular component movement	-6.1	2.9	6	24156	601	370	27	7.3	1.4	728|1601|1839|2041|2155|2822|3091|3162|3383|3491|3570|3673|3685|3725|3912|4318|4739|4851|5054|6282|6364|7114|7852|8754|10457|22919|27347	C5AR1|DAB2|HBEGF|EPHA1|F7|GPLD1|HIF1A|HMOX1|ICAM1|CCN1|IL6R|ITGA2|ITGAV|JUN|LAMB1|MMP9|NEDD9|NOTCH1|SERPINE1|S100A11|CCL20|TMSB4X|CXCR4|ADAM9|GPNMB|MAPRE1|STK39	-4.3	Input ID
GO-BP	19	GO:0001817	regulation of cytokine production	-6.1	2.7	5.9	24156	755	370	31	8.4	1.4	335|383|728|1649|1992|2207|3091|3162|3570|3685|4321|5054|5345|5552|5621|6372|7097|7114|7128|7305|7538|9314|10457|10643|11326|23643|27242|29923|84868|114770|100133941	APOA1|ARG1|C5AR1|DDIT3|SERPINB1|FCER1G|HIF1A|HMOX1|IL6R|ITGAV|MMP12|SERPINE1|SERPINF2|SRGN|PRNP|CXCL6|TLR2|TMSB4X|TNFAIP3|TYROBP|ZFP36|KLF4|GPNMB|IGF2BP3|VSIG4|LY96|TNFRSF21|HILPDA|HAVCR2|PGLYRP2|CD24	-4.3	Input ID
GO-BP	19	GO:0070613	regulation of protein processing	-6.1	5.1	6.8	24156	180	370	14	3.8	0.99	714|728|729|732|1361|2023|2161|3818|5054|5270|5345|5621|10877|11326	C1QC|C5AR1|C6|C8B|CPB2|ENO1|F12|KLKB1|SERPINE1|SERPINE2|SERPINF2|PRNP|CFHR4|VSIG4	-4.2	Input ID
GO-BP	19	GO:0010757	negative regulation of plasminogen activation	-6.1	44	13	24156	6	370	4	1.1	0.54	1361|5054|5270|5345	CPB2|SERPINE1|SERPINE2|SERPINF2	-4.2	Input ID
GO-BP	19	GO:0097190	apoptotic signaling pathway	-6.1	2.9	5.9	24156	607	370	27	7.3	1.4	467|597|665|960|1075|1649|1687|2023|3091|3162|3383|3570|3685|3725|4318|5054|5329|5552|6279|6280|7128|7305|23643|23645|30001|54541|100133941	ATF3|BCL2A1|BNIP3L|CD44|CTSC|DDIT3|GSDME|ENO1|HIF1A|HMOX1|ICAM1|IL6R|ITGAV|JUN|MMP9|SERPINE1|PLAUR|SRGN|S100A8|S100A9|TNFAIP3|TYROBP|LY96|PPP1R15A|ERO1A|DDIT4|CD24	-4.2	Input ID
GO-BP	19	GO:0040017	positive regulation of locomotion	-6	2.9	5.9	24156	612	370	27	7.3	1.4	728|1601|1839|2041|2155|2822|3091|3162|3383|3491|3570|3673|3685|3725|3912|4318|4739|4851|5054|6282|6364|7114|7852|8754|10457|22919|27347	C5AR1|DAB2|HBEGF|EPHA1|F7|GPLD1|HIF1A|HMOX1|ICAM1|CCN1|IL6R|ITGA2|ITGAV|JUN|LAMB1|MMP9|NEDD9|NOTCH1|SERPINE1|S100A11|CCL20|TMSB4X|CXCR4|ADAM9|GPNMB|MAPRE1|STK39	-4.1	Input ID
GO-BP	19	GO:0090303	positive regulation of wound healing	-6	8.5	7.8	24156	69	370	9	2.4	0.8	1361|1839|2155|2161|3273|5054|5340|5345|7852	CPB2|HBEGF|F7|F12|HRG|SERPINE1|PLG|SERPINF2|CXCR4	-4.1	Input ID
GO-BP	19	GO:0050900	leukocyte migration	-6	3.1	6	24156	504	370	24	6.5	1.3	483|728|960|1880|2155|2207|3162|3383|3570|3673|3685|4312|4973|5054|5340|6279|6280|6364|6370|6372|6374|7852|9056|27347	ATP1B3|C5AR1|CD44|GPR183|F7|FCER1G|HMOX1|ICAM1|IL6R|ITGA2|ITGAV|MMP1|OLR1|SERPINE1|PLG|S100A8|S100A9|CCL20|CCL25|CXCL6|CXCL5|CXCR4|SLC7A7|STK39	-4.1	Input ID
GO-BP	19	GO:0071396	cellular response to lipid	-5.9	2.9	5.8	24156	616	370	27	7.3	1.4	383|1373|1581|1601|2822|3383|3673|5054|5106|5244|6372|6374|6696|6781|7097|7128|7538|8564|8754|8856|9314|9970|23643|54541|55022|84649|84868	ARG1|CPS1|CYP7A1|DAB2|GPLD1|ICAM1|ITGA2|SERPINE1|PCK2|ABCB4|CXCL6|CXCL5|SPP1|STC1|TLR2|TNFAIP3|ZFP36|KMO|ADAM9|NR1I2|KLF4|NR1I3|LY96|DDIT4|PID1|DGAT2|HAVCR2	-4.1	Input ID
GO-BP	19	GO:0006766	vitamin metabolic process	-5.9	5.8	7	24156	135	370	12	3.2	0.92	1593|4363|4594|5360|6513|6515|8529|8564|8875|9104|23498|171425	CYP27A1|ABCC1|MMUT|PLTP|SLC2A1|SLC2A3|CYP4F2|KMO|VNN2|RGN|HAAO|CLYBL	-4.1	Input ID
GO-BP	19	GO:0042593	glucose homeostasis	-5.9	4.3	6.4	24156	243	370	16	4.3	1.1	1361|1581|2538|2822|3091|3099|3383|3956|5106|5950|6659|25825|28999|51085|55107|123876	CPB2|CYP7A1|G6PC|GPLD1|HIF1A|HK2|ICAM1|LGALS1|PCK2|RBP4|SOX4|BACE2|KLF15|MLXIPL|ANO1|ACSM2A	-4.1	Input ID
GO-BP	19	GO:0033500	carbohydrate homeostasis	-5.9	4.3	6.4	24156	244	370	16	4.3	1.1	1361|1581|2538|2822|3091|3099|3383|3956|5106|5950|6659|25825|28999|51085|55107|123876	CPB2|CYP7A1|G6PC|GPLD1|HIF1A|HK2|ICAM1|LGALS1|PCK2|RBP4|SOX4|BACE2|KLF15|MLXIPL|ANO1|ACSM2A	-4	Input ID
GO-BP	19	GO:2001171	positive regulation of ATP biosynthetic process	-5.9	12	8.6	24156	37	370	7	1.9	0.71	2023|3091|5209|5210|7114|51085|55022	ENO1|HIF1A|PFKFB3|PFKFB4|TMSB4X|MLXIPL|PID1	-4	Input ID
GO-BP	19	GO:1903793	positive regulation of anion transport	-5.9	9.9	8	24156	53	370	8	2.2	0.76	18|335|1579|5244|6529|8529|8564|10991	ABAT|APOA1|CYP4A11|ABCB4|SLC6A1|CYP4F2|KMO|SLC38A3	-4	Input ID
GO-BP	19	GO:0055090	acylglycerol homeostasis	-5.8	12	8.5	24156	38	370	7	1.9	0.71	335|344|345|51085|84647|84649|123876	APOA1|APOC2|APOC3|MLXIPL|PLA2G12B|DGAT2|ACSM2A	-4	Input ID
GO-BP	19	GO:0070328	triglyceride homeostasis	-5.8	12	8.5	24156	38	370	7	1.9	0.71	335|344|345|51085|84647|84649|123876	APOA1|APOC2|APOC3|MLXIPL|PLA2G12B|DGAT2|ACSM2A	-4	Input ID
GO-BP	19	GO:0009123	nucleoside monophosphate metabolic process	-5.8	3.5	6	24156	377	370	20	5.4	1.2	226|229|2023|2026|2203|3091|3099|3939|5209|5210|5214|5230|5313|5315|7114|51085|54541|55022|55526|55753	ALDOA|ALDOB|ENO1|ENO2|FBP1|HIF1A|HK2|LDHA|PFKFB3|PFKFB4|PFKP|PGK1|PKLR|PKM|TMSB4X|MLXIPL|DDIT4|PID1|DHTKD1|OGDHL	-3.9	Input ID
GO-BP	19	GO:0007565	female pregnancy	-5.7	4.7	6.5	24156	194	370	14	3.8	0.99	133|383|2353|2806|3673|4316|4318|5066|5997|6513|6696|6781|10991|84868	ADM|ARG1|FOS|GOT2|ITGA2|MMP7|MMP9|PAM|RGS2|SLC2A1|SPP1|STC1|SLC38A3|HAVCR2	-3.9	Input ID
GO-BP	19	GO:0031100	animal organ regeneration	-5.7	7.9	7.5	24156	74	370	9	2.4	0.8	133|335|728|1361|2155|3162|4851|5315|9104	ADM|APOA1|C5AR1|CPB2|F7|HMOX1|NOTCH1|PKM|RGN	-3.9	Input ID
GO-BP	19	GO:0009749	response to glucose	-5.7	4.7	6.4	24156	195	370	14	3.8	0.99	1361|1581|2822|2998|3091|3383|3795|3939|3956|5106|5313|6659|51085|55107	CPB2|CYP7A1|GPLD1|GYS2|HIF1A|ICAM1|KHK|LDHA|LGALS1|PCK2|PKLR|SOX4|MLXIPL|ANO1	-3.8	Input ID
GO-BP	19	GO:0016125	sterol metabolic process	-5.7	5	6.5	24156	169	370	13	3.5	0.96	335|847|1559|1581|1593|2539|3158|5444|6319|6718|7108|84649|285440	APOA1|CAT|CYP2C9|CYP7A1|CYP27A1|G6PD|HMGCS2|PON1|SCD|AKR1D1|TM7SF2|DGAT2|CYP4V2	-3.8	Input ID
GO-BP	19	GO:0043065	positive regulation of apoptotic process	-5.6	2.7	5.6	24156	679	370	28	7.6	1.4	133|467|665|1075|1649|1687|1848|2822|3162|3273|3486|3491|3725|3827|3939|4318|4851|5329|5621|6279|6280|6659|7305|7498|9240|22822|29948|112399	ADM|ATF3|BNIP3L|CTSC|DDIT3|GSDME|DUSP6|GPLD1|HMOX1|HRG|IGFBP3|CCN1|JUN|KNG1|LDHA|MMP9|NOTCH1|PLAUR|PRNP|S100A8|S100A9|SOX4|TYROBP|XDH|PNMA1|PHLDA1|OSGIN1|EGLN3	-3.8	Input ID
GO-BP	19	GO:0048545	response to steroid hormone	-5.6	3.4	5.9	24156	386	370	20	5.4	1.2	133|189|383|1373|1601|2353|3383|4015|4851|5066|5106|6696|6781|6898|7097|7538|8754|8856|9970|54541	ADM|AGXT|ARG1|CPS1|DAB2|FOS|ICAM1|LOX|NOTCH1|PAM|PCK2|SPP1|STC1|TAT|TLR2|ZFP36|ADAM9|NR1I2|NR1I3|DDIT4	-3.8	Input ID
GO-BP	19	GO:0045981	positive regulation of nucleotide metabolic process	-5.6	9	7.6	24156	58	370	8	2.2	0.76	2023|3091|5209|5210|5230|7114|51085|55022	ENO1|HIF1A|PFKFB3|PFKFB4|PGK1|TMSB4X|MLXIPL|PID1	-3.7	Input ID
GO-BP	19	GO:1900544	positive regulation of purine nucleotide metabolic process	-5.6	9	7.6	24156	58	370	8	2.2	0.76	2023|3091|5209|5210|5230|7114|51085|55022	ENO1|HIF1A|PFKFB3|PFKFB4|PGK1|TMSB4X|MLXIPL|PID1	-3.7	Input ID
GO-BP	19	GO:0009746	response to hexose	-5.6	4.6	6.3	24156	200	370	14	3.8	0.99	1361|1581|2822|2998|3091|3383|3795|3939|3956|5106|5313|6659|51085|55107	CPB2|CYP7A1|GPLD1|GYS2|HIF1A|ICAM1|KHK|LDHA|LGALS1|PCK2|PKLR|SOX4|MLXIPL|ANO1	-3.7	Input ID
GO-BP	19	GO:0043068	positive regulation of programmed cell death	-5.5	2.7	5.5	24156	688	370	28	7.6	1.4	133|467|665|1075|1649|1687|1848|2822|3162|3273|3486|3491|3725|3827|3939|4318|4851|5329|5621|6279|6280|6659|7305|7498|9240|22822|29948|112399	ADM|ATF3|BNIP3L|CTSC|DDIT3|GSDME|DUSP6|GPLD1|HMOX1|HRG|IGFBP3|CCN1|JUN|KNG1|LDHA|MMP9|NOTCH1|PLAUR|PRNP|S100A8|S100A9|SOX4|TYROBP|XDH|PNMA1|PHLDA1|OSGIN1|EGLN3	-3.7	Input ID
GO-BP	19	GO:0000096	sulfur amino acid metabolic process	-5.5	11	8	24156	42	370	7	1.9	0.71	189|635|1373|4143|4594|7263|27232	AGXT|BHMT|CPS1|MAT1A|MMUT|TST|GNMT	-3.7	Input ID
GO-BP	19	GO:0006805	xenobiotic metabolic process	-5.5	5.8	6.7	24156	124	370	11	3	0.88	670|1548|1549|1551|1559|1577|2052|5446|8824|8856|348158	BPHL|CYP2A6|CYP2A7|CYP3A7|CYP2C9|CYP3A5|EPHX1|PON3|CES2|NR1I2|ACSM2B	-3.6	Input ID
GO-BP	19	GO:0008285	negative regulation of cell proliferation	-5.5	2.5	5.4	24156	773	370	30	8.1	1.4	133|283|383|563|1361|1687|2822|3162|3273|3486|3725|4851|5270|5340|5621|5950|6282|6659|7097|7128|7305|7498|9104|9314|10397|10400|10457|11326|27242|84868	ADM|ANG|ARG1|AZGP1|CPB2|GSDME|GPLD1|HMOX1|HRG|IGFBP3|JUN|NOTCH1|SERPINE2|PLG|PRNP|RBP4|S100A11|SOX4|TLR2|TNFAIP3|TYROBP|XDH|RGN|KLF4|NDRG1|PEMT|GPNMB|VSIG4|TNFRSF21|HAVCR2	-3.6	Input ID
GO-BP	19	GO:0009074	aromatic amino acid family catabolic process	-5.5	14	8.6	24156	28	370	6	1.6	0.66	3081|3242|6898|8564|10841|23498	HGD|HPD|TAT|KMO|FTCD|HAAO	-3.6	Input ID
GO-BP	19	GO:0006959	humoral immune response	-5.4	3.4	5.8	24156	361	370	19	5.1	1.1	714|728|729|732|1361|1880|3263|3273|4069|4851|6279|6280|6372|6374|10747|10877|11326|27242|114770	C1QC|C5AR1|C6|C8B|CPB2|GPR183|HPX|HRG|LYZ|NOTCH1|S100A8|S100A9|CXCL6|CXCL5|MASP2|CFHR4|VSIG4|TNFRSF21|PGLYRP2	-3.6	Input ID
GO-BP	19	GO:0001678	cellular glucose homeostasis	-5.4	5.2	6.4	24156	151	370	12	3.2	0.92	1361|1581|2822|3091|3099|3383|3956|5106|6659|28999|51085|55107	CPB2|CYP7A1|GPLD1|HIF1A|HK2|ICAM1|LGALS1|PCK2|SOX4|KLF15|MLXIPL|ANO1	-3.6	Input ID
GO-BP	19	GO:0001568	blood vessel development	-5.4	2.5	5.4	24156	777	370	30	8.1	1.4	133|283|302|728|729|1649|2041|2822|3091|3099|3162|3273|3491|3570|3685|3725|4015|4851|5054|5230|5315|5340|5345|6659|7128|7498|7852|9314|10457|23670	ADM|ANG|ANXA2|C5AR1|C6|DDIT3|EPHA1|GPLD1|HIF1A|HK2|HMOX1|HRG|CCN1|IL6R|ITGAV|JUN|LOX|NOTCH1|SERPINE1|PGK1|PKM|PLG|SERPINF2|SOX4|TNFAIP3|XDH|CXCR4|KLF4|GPNMB|CEMIP2	-3.6	Input ID
GO-BP	19	GO:0032368	regulation of lipid transport	-5.4	5.7	6.6	24156	126	370	11	3	0.88	302|335|344|345|1579|3685|5244|5360|5444|6696|8529	ANXA2|APOA1|APOC2|APOC3|CYP4A11|ITGAV|ABCB4|PLTP|PON1|SPP1|CYP4F2	-3.6	Input ID
GO-BP	19	GO:0042133	neurotransmitter metabolic process	-5.4	5.2	6.4	24156	152	370	12	3.2	0.92	18|189|635|1373|1807|3383|7097|7915|9104|9314|29958|51733	ABAT|AGXT|BHMT|CPS1|DPYS|ICAM1|TLR2|ALDH5A1|RGN|KLF4|DMGDH|UPB1	-3.6	Input ID
GO-BP	19	GO:0071456	cellular response to hypoxia	-5.4	4.4	6.1	24156	208	370	14	3.8	0.99	665|768|2023|3091|3162|3383|4851|5230|6781|9520|10397|29923|30001|112399	BNIP3L|CA9|ENO1|HIF1A|HMOX1|ICAM1|NOTCH1|PGK1|STC1|NPEPPS|NDRG1|HILPDA|ERO1A|EGLN3	-3.5	Input ID
GO-BP	19	GO:0034369	plasma lipoprotein particle remodeling	-5.4	14	8.4	24156	29	370	6	1.6	0.66	335|344|345|4018|5360|5444	APOA1|APOC2|APOC3|LPA|PLTP|PON1	-3.5	Input ID
GO-BP	19	GO:0034368	protein-lipid complex remodeling	-5.4	14	8.4	24156	29	370	6	1.6	0.66	335|344|345|4018|5360|5444	APOA1|APOC2|APOC3|LPA|PLTP|PON1	-3.5	Input ID
GO-BP	19	GO:0042572	retinol metabolic process	-5.4	10	7.8	24156	44	370	7	1.9	0.71	124|1551|1577|5950|7276|8608|84649	ADH1A|CYP3A7|CYP3A5|RBP4|TTR|RDH16|DGAT2	-3.5	Input ID
GO-BP	19	GO:1903036	positive regulation of response to wounding	-5.3	7.2	7	24156	82	370	9	2.4	0.8	1361|1839|2155|2161|3273|5054|5340|5345|7852	CPB2|HBEGF|F7|F12|HRG|SERPINE1|PLG|SERPINF2|CXCR4	-3.5	Input ID
GO-BP	19	GO:0008203	cholesterol metabolic process	-5.3	5.1	6.3	24156	154	370	12	3.2	0.92	335|847|1559|1581|1593|2539|3158|5444|6319|6718|7108|84649	APOA1|CAT|CYP2C9|CYP7A1|CYP27A1|G6PD|HMGCS2|PON1|SCD|AKR1D1|TM7SF2|DGAT2	-3.5	Input ID
GO-BP	19	GO:0009062	fatty acid catabolic process	-5.3	6.2	6.7	24156	105	370	10	2.7	0.84	1579|1962|4051|4594|5106|5264|8309|8529|11001|55268	CYP4A11|EHHADH|CYP4F3|MMUT|PCK2|PHYH|ACOX2|CYP4F2|SLC27A2|ECHDC2	-3.5	Input ID
GO-BP	19	GO:0032370	positive regulation of lipid transport	-5.3	8.3	7.2	24156	63	370	8	2.2	0.76	302|335|1579|5244|5360|5444|6696|8529	ANXA2|APOA1|CYP4A11|ABCB4|PLTP|PON1|SPP1|CYP4F2	-3.5	Input ID
GO-BP	19	GO:0034367	protein-containing complex remodeling	-5.3	13	8.2	24156	30	370	6	1.6	0.66	335|344|345|4018|5360|5444	APOA1|APOC2|APOC3|LPA|PLTP|PON1	-3.5	Input ID
GO-BP	19	GO:0048732	gland development	-5.3	3.1	5.6	24156	442	370	21	5.7	1.2	335|383|462|1361|1373|2119|2806|3091|3099|3162|3673|3725|4851|5066|5104|5106|5270|5315|7128|7498|9104	APOA1|ARG1|SERPINC1|CPB2|CPS1|ETV5|GOT2|HIF1A|HK2|HMOX1|ITGA2|JUN|NOTCH1|PAM|SERPINA5|PCK2|SERPINE2|PKM|TNFAIP3|XDH|RGN	-3.5	Input ID
GO-BP	19	GO:0071222	cellular response to lipopolysaccharide	-5.3	4.3	6	24156	212	370	14	3.8	0.99	383|3383|5054|6372|6374|7097|7128|7538|8564|8754|8856|9970|23643|84868	ARG1|ICAM1|SERPINE1|CXCL6|CXCL5|TLR2|TNFAIP3|ZFP36|KMO|ADAM9|NR1I2|NR1I3|LY96|HAVCR2	-3.5	Input ID
GO-BP	19	GO:0046686	response to cadmium ion	-5.2	8.2	7.2	24156	64	370	8	2.2	0.76	383|847|2353|3162|3725|4318|5621|23498	ARG1|CAT|FOS|HMOX1|JUN|MMP9|PRNP|HAAO	-3.4	Input ID
GO-BP	19	GO:1905954	positive regulation of lipid localization	-5.2	6.9	6.8	24156	85	370	9	2.4	0.8	302|335|1579|5244|5360|5444|6696|8529|29923	ANXA2|APOA1|CYP4A11|ABCB4|PLTP|PON1|SPP1|CYP4F2|HILPDA	-3.4	Input ID
GO-BP	19	GO:0032102	negative regulation of response to external stimulus	-5.2	3.3	5.6	24156	376	370	19	5.1	1.1	18|335|1361|2160|2161|3273|3818|3827|4851|5054|5270|5329|5340|5345|5624|6696|7128|9314|84868	ABAT|APOA1|CPB2|F11|F12|HRG|KLKB1|KNG1|NOTCH1|SERPINE1|SERPINE2|PLAUR|PLG|SERPINF2|PROC|SPP1|TNFAIP3|KLF4|HAVCR2	-3.4	Input ID
GO-BP	19	GO:0006691	leukotriene metabolic process	-5.2	13	8.1	24156	31	370	6	1.6	0.66	241|1579|4051|4363|7097|8529	ALOX5AP|CYP4A11|CYP4F3|ABCC1|TLR2|CYP4F2	-3.4	Input ID
GO-BP	19	GO:1903319	positive regulation of protein maturation	-5.2	13	8.1	24156	31	370	6	1.6	0.66	729|2023|2161|3818|6659|7036	C6|ENO1|F12|KLKB1|SOX4|TFR2	-3.4	Input ID
GO-BP	19	GO:1901607	alpha-amino acid biosynthetic process	-5.2	8	7.1	24156	65	370	8	2.2	0.76	189|586|635|1373|2593|2806|5352|27165	AGXT|BCAT1|BHMT|CPS1|GAMT|GOT2|PLOD2|GLS2	-3.4	Input ID
GO-BP	19	GO:0030810	positive regulation of nucleotide biosynthetic process	-5.2	9.7	7.5	24156	47	370	7	1.9	0.71	2023|3091|5209|5210|7114|51085|55022	ENO1|HIF1A|PFKFB3|PFKFB4|TMSB4X|MLXIPL|PID1	-3.4	Input ID
GO-BP	19	GO:1900373	positive regulation of purine nucleotide biosynthetic process	-5.2	9.7	7.5	24156	47	370	7	1.9	0.71	2023|3091|5209|5210|7114|51085|55022	ENO1|HIF1A|PFKFB3|PFKFB4|TMSB4X|MLXIPL|PID1	-3.4	Input ID
GO-BP	19	GO:0001676	long-chain fatty acid metabolic process	-5.2	6	6.5	24156	109	370	10	2.7	0.84	1548|1549|1559|1579|4051|5066|8529|10998|11000|11001	CYP2A6|CYP2A7|CYP2C9|CYP4A11|CYP4F3|PAM|CYP4F2|SLC27A5|SLC27A3|SLC27A2	-3.4	Input ID
GO-BP	19	GO:0001818	negative regulation of cytokine production	-5.2	3.6	5.7	24156	311	370	17	4.6	1.1	335|383|1992|3162|5552|5621|7114|7128|7305|7538|9314|10457|11326|27242|84868|114770|100133941	APOA1|ARG1|SERPINB1|HMOX1|SRGN|PRNP|TMSB4X|TNFAIP3|TYROBP|ZFP36|KLF4|GPNMB|VSIG4|TNFRSF21|HAVCR2|PGLYRP2|CD24	-3.4	Input ID
GO-BP	19	GO:1905952	regulation of lipid localization	-5.2	4.9	6.2	24156	160	370	12	3.2	0.92	302|335|344|345|1579|3685|5244|5360|5444|6696|8529|29923	ANXA2|APOA1|APOC2|APOC3|CYP4A11|ITGAV|ABCB4|PLTP|PON1|SPP1|CYP4F2|HILPDA	-3.4	Input ID
GO-BP	19	GO:1902652	secondary alcohol metabolic process	-5.2	4.9	6.2	24156	160	370	12	3.2	0.92	335|847|1559|1581|1593|2539|3158|5444|6319|6718|7108|84649	APOA1|CAT|CYP2C9|CYP7A1|CYP27A1|G6PD|HMGCS2|PON1|SCD|AKR1D1|TM7SF2|DGAT2	-3.4	Input ID
GO-BP	19	GO:0032868	response to insulin	-5.1	3.7	5.7	24156	279	370	16	4.3	1.1	133|847|2538|2806|2822|3383|3795|5106|5313|5315|6513|7097|11031|23433|28999|55022	ADM|CAT|G6PC|GOT2|GPLD1|ICAM1|KHK|PCK2|PKLR|PKM|SLC2A1|TLR2|RAB31|RHOQ|KLF15|PID1	-3.4	Input ID
GO-BP	19	GO:0036294	cellular response to decreased oxygen levels	-5.1	4.2	5.9	24156	218	370	14	3.8	0.99	665|768|2023|3091|3162|3383|4851|5230|6781|9520|10397|29923|30001|112399	BNIP3L|CA9|ENO1|HIF1A|HMOX1|ICAM1|NOTCH1|PGK1|STC1|NPEPPS|NDRG1|HILPDA|ERO1A|EGLN3	-3.4	Input ID
GO-BP	19	GO:0002673	regulation of acute inflammatory response	-5.1	4.9	6.1	24156	161	370	12	3.2	0.92	714|728|729|732|1361|1776|2161|2207|3818|9180|10877|11326	C1QC|C5AR1|C6|C8B|CPB2|DNASE1L3|F12|FCER1G|KLKB1|OSMR|CFHR4|VSIG4	-3.4	Input ID
GO-BP	19	GO:0071216	cellular response to biotic stimulus	-5.1	3.9	5.8	24156	249	370	15	4.1	1	383|1649|3383|5054|6372|6374|7097|7128|7538|8564|8754|8856|9970|23643|84868	ARG1|DDIT3|ICAM1|SERPINE1|CXCL6|CXCL5|TLR2|TNFAIP3|ZFP36|KMO|ADAM9|NR1I2|NR1I3|LY96|HAVCR2	-3.3	Input ID
GO-BP	19	GO:0006767	water-soluble vitamin metabolic process	-5	6.6	6.6	24156	89	370	9	2.4	0.8	4363|4594|6513|6515|8564|8875|9104|23498|171425	ABCC1|MMUT|SLC2A1|SLC2A3|KMO|VNN2|RGN|HAAO|CLYBL	-3.3	Input ID
GO-BP	19	GO:0002790	peptide secretion	-5	2.6	5.2	24156	649	370	26	7	1.3	18|283|335|1992|2822|3091|3685|4321|4851|5066|5552|5950|6279|6513|6514|6567|6659|7036|7097|7114|7128|8754|27242|55107|84868|93145	ABAT|ANG|APOA1|SERPINB1|GPLD1|HIF1A|ITGAV|MMP12|NOTCH1|PAM|SRGN|RBP4|S100A8|SLC2A1|SLC2A2|SLC16A2|SOX4|TFR2|TLR2|TMSB4X|TNFAIP3|ADAM9|TNFRSF21|ANO1|HAVCR2|OLFM2	-3.3	Input ID
GO-BP	19	GO:0006625	protein targeting to peroxisome	-5	7.7	6.9	24156	68	370	8	2.2	0.76	189|847|1610|1962|5264|8309|11001|51268	AGXT|CAT|DAO|EHHADH|PHYH|ACOX2|SLC27A2|PIPOX	-3.3	Input ID
GO-BP	19	GO:0034381	plasma lipoprotein particle clearance	-5	7.7	6.9	24156	68	370	8	2.2	0.76	302|335|344|345|2822|3162|29116|84649	ANXA2|APOA1|APOC2|APOC3|GPLD1|HMOX1|MYLIP|DGAT2	-3.3	Input ID
GO-BP	19	GO:0072662	protein localization to peroxisome	-5	7.7	6.9	24156	68	370	8	2.2	0.76	189|847|1610|1962|5264|8309|11001|51268	AGXT|CAT|DAO|EHHADH|PHYH|ACOX2|SLC27A2|PIPOX	-3.3	Input ID
GO-BP	19	GO:0072663	establishment of protein localization to peroxisome	-5	7.7	6.9	24156	68	370	8	2.2	0.76	189|847|1610|1962|5264|8309|11001|51268	AGXT|CAT|DAO|EHHADH|PHYH|ACOX2|SLC27A2|PIPOX	-3.3	Input ID
GO-BP	19	GO:0048514	blood vessel morphogenesis	-5	2.6	5.2	24156	690	370	27	7.3	1.4	133|283|302|728|729|2041|2822|3091|3099|3162|3273|3491|3685|3725|4015|4851|5054|5230|5315|5345|6659|7128|7498|7852|9314|10457|23670	ADM|ANG|ANXA2|C5AR1|C6|EPHA1|GPLD1|HIF1A|HK2|HMOX1|HRG|CCN1|ITGAV|JUN|LOX|NOTCH1|SERPINE1|PGK1|PKM|SERPINF2|SOX4|TNFAIP3|XDH|CXCR4|KLF4|GPNMB|CEMIP2	-3.3	Input ID
GO-BP	19	GO:0006536	glutamate metabolic process	-5	12	7.8	24156	33	370	6	1.6	0.66	2806|6898|7915|10841|27165|137872	GOT2|TAT|ALDH5A1|FTCD|GLS2|ADHFE1	-3.3	Input ID
GO-BP	19	GO:0030595	leukocyte chemotaxis	-5	4.1	5.8	24156	223	370	14	3.8	0.99	728|1880|2155|2207|3570|5054|6279|6280|6364|6370|6372|6374|7852|27347	C5AR1|GPR183|F7|FCER1G|IL6R|SERPINE1|S100A8|S100A9|CCL20|CCL25|CXCL6|CXCL5|CXCR4|STK39	-3.3	Input ID
GO-BP	19	GO:0072593	reactive oxygen species metabolic process	-5	3.7	5.6	24156	286	370	16	4.3	1.1	847|1373|2539|3091|3099|3383|3491|5446|7097|7305|7498|9104|9314|27165|54541|55022	CAT|CPS1|G6PD|HIF1A|HK2|ICAM1|CCN1|PON3|TLR2|TYROBP|XDH|RGN|KLF4|GLS2|DDIT4|PID1	-3.3	Input ID
GO-BP	19	GO:0031589	cell-substrate adhesion	-5	3.3	5.5	24156	353	370	18	4.9	1.1	335|960|2041|3273|3491|3673|3685|3912|3956|4321|4739|4851|5054|5340|6370|8754|23603|54749	APOA1|CD44|EPHA1|HRG|CCN1|ITGA2|ITGAV|LAMB1|LGALS1|MMP12|NEDD9|NOTCH1|SERPINE1|PLG|CCL25|ADAM9|CORO1C|EPDR1	-3.2	Input ID
GO-BP	19	GO:0001889	liver development	-5	5.2	6.1	24156	139	370	11	3	0.88	383|1361|1373|3162|3673|3725|4851|5106|5315|7128|9104	ARG1|CPB2|CPS1|HMOX1|ITGA2|JUN|NOTCH1|PCK2|PKM|TNFAIP3|RGN	-3.2	Input ID
GO-BP	19	GO:0043574	peroxisomal transport	-5	7.6	6.8	24156	69	370	8	2.2	0.76	189|847|1610|1962|5264|8309|11001|51268	AGXT|CAT|DAO|EHHADH|PHYH|ACOX2|SLC27A2|PIPOX	-3.2	Input ID
GO-BP	19	GO:0019373	epoxygenase P450 pathway	-5	16	8.5	24156	20	370	5	1.4	0.6	1548|1549|1559|1579|8529	CYP2A6|CYP2A7|CYP2C9|CYP4A11|CYP4F2	-3.2	Input ID
GO-BP	19	GO:0030388	fructose 1,6-bisphosphate metabolic process	-5	26	9.9	24156	10	370	4	1.1	0.54	226|229|2203|5214	ALDOA|ALDOB|FBP1|PFKP	-3.2	Input ID
GO-BP	19	GO:0001505	regulation of neurotransmitter levels	-5	3.3	5.5	24156	355	370	18	4.9	1.1	18|189|635|1373|1807|3383|5217|5538|5997|6529|7097|7915|8564|9104|9314|29958|51733|81539	ABAT|AGXT|BHMT|CPS1|DPYS|ICAM1|PFN2|PPT1|RGS2|SLC6A1|TLR2|ALDH5A1|KMO|RGN|KLF4|DMGDH|UPB1|SLC38A1	-3.2	Input ID
GO-BP	19	GO:0071219	cellular response to molecule of bacterial origin	-5	4.1	5.8	24156	225	370	14	3.8	0.99	383|3383|5054|6372|6374|7097|7128|7538|8564|8754|8856|9970|23643|84868	ARG1|ICAM1|SERPINE1|CXCL6|CXCL5|TLR2|TNFAIP3|ZFP36|KMO|ADAM9|NR1I2|NR1I3|LY96|HAVCR2	-3.2	Input ID
GO-BP	19	GO:0032602	chemokine production	-4.9	6.4	6.5	24156	92	370	9	2.4	0.8	3091|3162|3570|6279|6280|6372|7097|9314|84868	HIF1A|HMOX1|IL6R|S100A8|S100A9|CXCL6|TLR2|KLF4|HAVCR2	-3.2	Input ID
GO-BP	19	GO:0002697	regulation of immune effector process	-4.9	2.9	5.3	24156	466	370	21	5.7	1.2	335|383|563|714|728|729|732|1361|1776|2207|3162|3263|4321|5272|5950|6372|7128|10877|11326|84868|114770	APOA1|ARG1|AZGP1|C1QC|C5AR1|C6|C8B|CPB2|DNASE1L3|FCER1G|HMOX1|HPX|MMP12|SERPINB9|RBP4|CXCL6|TNFAIP3|CFHR4|VSIG4|HAVCR2|PGLYRP2	-3.2	Input ID
GO-BP	19	GO:0061008	hepaticobiliary system development	-4.9	5.1	6	24156	142	370	11	3	0.88	383|1361|1373|3162|3673|3725|4851|5106|5315|7128|9104	ARG1|CPB2|CPS1|HMOX1|ITGA2|JUN|NOTCH1|PCK2|PKM|TNFAIP3|RGN	-3.2	Input ID
GO-BP	19	GO:0071322	cellular response to carbohydrate stimulus	-4.9	5	6	24156	143	370	11	3	0.88	1361|1581|2822|3091|3383|3956|5106|6659|51085|55107|81035	CPB2|CYP7A1|GPLD1|HIF1A|ICAM1|LGALS1|PCK2|SOX4|MLXIPL|ANO1|COLEC12	-3.1	Input ID
GO-BP	19	GO:0032892	positive regulation of organic acid transport	-4.9	11	7.5	24156	35	370	6	1.6	0.66	18|1579|6529|8529|8564|10991	ABAT|CYP4A11|SLC6A1|CYP4F2|KMO|SLC38A3	-3.1	Input ID
GO-BP	19	GO:0070371	ERK1 and ERK2 cascade	-4.9	3.4	5.4	24156	328	370	17	4.6	1.1	335|467|728|960|1848|1880|3383|3491|3685|3725|4851|5345|6364|6370|9314|10457|84868	APOA1|ATF3|C5AR1|CD44|DUSP6|GPR183|ICAM1|CCN1|ITGAV|JUN|NOTCH1|SERPINF2|CCL20|CCL25|KLF4|GPNMB|HAVCR2	-3.1	Input ID
GO-BP	19	GO:0036101	leukotriene B4 catabolic process	-4.9	49	12	24156	4	370	3	0.81	0.47	1579|4051|8529	CYP4A11|CYP4F3|CYP4F2	-3.1	Input ID
GO-BP	19	GO:0036102	leukotriene B4 metabolic process	-4.9	49	12	24156	4	370	3	0.81	0.47	1579|4051|8529	CYP4A11|CYP4F3|CYP4F2	-3.1	Input ID
GO-BP	19	GO:0036100	leukotriene catabolic process	-4.9	49	12	24156	4	370	3	0.81	0.47	1579|4051|8529	CYP4A11|CYP4F3|CYP4F2	-3.1	Input ID
GO-BP	19	GO:0051047	positive regulation of secretion	-4.8	3	5.2	24156	436	370	20	5.4	1.2	18|283|1361|1579|2207|2822|3091|4321|5950|6279|6529|6659|6696|7036|7097|8529|8564|8754|55107|84868	ABAT|ANG|CPB2|CYP4A11|FCER1G|GPLD1|HIF1A|MMP12|RBP4|S100A8|SLC6A1|SOX4|SPP1|TFR2|TLR2|CYP4F2|KMO|ADAM9|ANO1|HAVCR2	-3.1	Input ID
GO-BP	19	GO:0015850	organic hydroxy compound transport	-4.8	3.7	5.5	24156	264	370	15	4.1	1	18|302|335|344|345|2207|5244|5360|5444|5950|6554|6580|6696|10998|11309	ABAT|ANXA2|APOA1|APOC2|APOC3|FCER1G|ABCB4|PLTP|PON1|RBP4|SLC10A1|SLC22A1|SPP1|SLC27A5|SLCO2B1	-3.1	Input ID
GO-BP	19	GO:0006699	bile acid biosynthetic process	-4.8	11	7.4	24156	36	370	6	1.6	0.66	1581|1593|6718|8309|10998|11001	CYP7A1|CYP27A1|AKR1D1|ACOX2|SLC27A5|SLC27A2	-3.1	Input ID
GO-BP	19	GO:0090208	positive regulation of triglyceride metabolic process	-4.8	15	8.1	24156	22	370	5	1.4	0.6	335|344|2822|9104|84649	APOA1|APOC2|GPLD1|RGN|DGAT2	-3	Input ID
GO-BP	19	GO:0019682	glyceraldehyde-3-phosphate metabolic process	-4.8	15	8.1	24156	22	370	5	1.4	0.6	229|2539|3795|7086|132158	ALDOB|G6PD|KHK|TKT|GLYCTK	-3	Input ID
GO-BP	19	GO:0071453	cellular response to oxygen levels	-4.8	3.9	5.6	24156	235	370	14	3.8	0.99	665|768|2023|3091|3162|3383|4851|5230|6781|9520|10397|29923|30001|112399	BNIP3L|CA9|ENO1|HIF1A|HMOX1|ICAM1|NOTCH1|PGK1|STC1|NPEPPS|NDRG1|HILPDA|ERO1A|EGLN3	-3	Input ID
GO-BP	19	GO:0007589	body fluid secretion	-4.7	6.1	6.2	24156	97	370	9	2.4	0.8	302|462|2806|3091|3099|5066|7498|27347|65267	ANXA2|SERPINC1|GOT2|HIF1A|HK2|PAM|XDH|STK39|WNK3	-3	Input ID
GO-BP	19	GO:2001169	regulation of ATP biosynthetic process	-4.7	6.1	6.2	24156	97	370	9	2.4	0.8	2023|2203|3091|5209|5210|7114|51085|54541|55022	ENO1|FBP1|HIF1A|PFKFB3|PFKFB4|TMSB4X|MLXIPL|DDIT4|PID1	-3	Input ID
GO-BP	19	GO:0043434	response to peptide hormone	-4.7	2.9	5.2	24156	443	370	20	5.4	1.2	133|383|847|1373|2155|2538|2806|2822|3383|3795|5106|5313|5315|6513|7097|9518|11031|23433|28999|55022	ADM|ARG1|CAT|CPS1|F7|G6PC|GOT2|GPLD1|ICAM1|KHK|PCK2|PKLR|PKM|SLC2A1|TLR2|GDF15|RAB31|RHOQ|KLF15|PID1	-3	Input ID
GO-BP	19	GO:0001910	regulation of leukocyte mediated cytotoxicity	-4.7	7	6.5	24156	75	370	8	2.2	0.76	383|563|1776|3383|5272|6372|7305|84868	ARG1|AZGP1|DNASE1L3|ICAM1|SERPINB9|CXCL6|TYROBP|HAVCR2	-3	Input ID
GO-BP	19	GO:0002791	regulation of peptide secretion	-4.7	2.8	5.1	24156	520	370	22	5.9	1.2	18|283|335|1992|2822|3091|4321|5066|5552|5950|6279|6513|6514|6659|7036|7097|7114|7128|8754|27242|55107|84868	ABAT|ANG|APOA1|SERPINB1|GPLD1|HIF1A|MMP12|PAM|SRGN|RBP4|S100A8|SLC2A1|SLC2A2|SOX4|TFR2|TLR2|TMSB4X|TNFAIP3|ADAM9|TNFRSF21|ANO1|HAVCR2	-3	Input ID
GO-BP	19	GO:0097305	response to alcohol	-4.7	3.8	5.5	24156	239	370	14	3.8	0.99	18|847|1581|2155|2353|2539|2806|2822|3383|5950|5997|6279|9314|10400	ABAT|CAT|CYP7A1|F7|FOS|G6PD|GOT2|GPLD1|ICAM1|RBP4|RGS2|S100A8|KLF4|PEMT	-3	Input ID
GO-BP	19	GO:0006081	cellular aldehyde metabolic process	-4.7	6.9	6.4	24156	76	370	8	2.2	0.76	189|229|2539|2806|3029|3795|7086|132158	AGXT|ALDOB|G6PD|GOT2|HAGH|KHK|TKT|GLYCTK	-3	Input ID
GO-BP	19	GO:0043648	dicarboxylic acid metabolic process	-4.7	5.9	6.1	24156	99	370	9	2.4	0.8	2806|5264|6898|7915|8564|10841|23498|27165|137872	GOT2|PHYH|TAT|ALDH5A1|KMO|FTCD|HAAO|GLS2|ADHFE1	-3	Input ID
GO-BP	19	GO:1903578	regulation of ATP metabolic process	-4.7	5.3	5.9	24156	124	370	10	2.7	0.84	2023|2203|3091|5209|5210|5230|7114|51085|54541|55022	ENO1|FBP1|HIF1A|PFKFB3|PFKFB4|PGK1|TMSB4X|MLXIPL|DDIT4|PID1	-2.9	Input ID
GO-BP	19	GO:0032703	negative regulation of interleukin-2 production	-4.7	14	7.9	24156	23	370	5	1.4	0.6	5621|7128|7538|11326|84868	PRNP|TNFAIP3|ZFP36|VSIG4|HAVCR2	-2.9	Input ID
GO-BP	19	GO:0050729	positive regulation of inflammatory response	-4.7	4.8	5.8	24156	151	370	11	3	0.88	1075|2161|2207|3673|3818|4363|5054|6279|6280|7097|9180	CTSC|F12|FCER1G|ITGA2|KLKB1|ABCC1|SERPINE1|S100A8|S100A9|TLR2|OSMR	-2.9	Input ID
GO-BP	19	GO:1901569	fatty acid derivative catabolic process	-4.6	22	9	24156	12	370	4	1.1	0.54	622|1579|4051|8529	BDH1|CYP4A11|CYP4F3|CYP4F2	-2.9	Input ID
GO-BP	19	GO:1901617	organic hydroxy compound biosynthetic process	-4.6	3.6	5.3	24156	275	370	15	4.1	1	335|427|1581|1593|1610|2539|3158|5106|5360|6319|6718|7108|8309|10998|11001	APOA1|ASAH1|CYP7A1|CYP27A1|DAO|G6PD|HMGCS2|PCK2|PLTP|SCD|AKR1D1|TM7SF2|ACOX2|SLC27A5|SLC27A2	-2.9	Input ID
GO-BP	19	GO:0046486	glycerolipid metabolic process	-4.6	3	5.1	24156	416	370	19	5.1	1.1	283|335|344|345|847|1373|2538|2822|5106|5444|7915|9104|10400|10998|55224|79887|79888|80168|84649	ANG|APOA1|APOC2|APOC3|CAT|CPS1|G6PC|GPLD1|PCK2|PON1|ALDH5A1|RGN|PEMT|SLC27A5|ETNK2|PLBD1|LPCAT1|MOGAT2|DGAT2	-2.9	Input ID
GO-BP	19	GO:0009072	aromatic amino acid family metabolic process	-4.6	10	7	24156	39	370	6	1.6	0.66	3081|3242|6898|8564|10841|23498	HGD|HPD|TAT|KMO|FTCD|HAAO	-2.9	Input ID
GO-BP	19	GO:0046717	acid secretion	-4.6	5.1	5.8	24156	127	370	10	2.7	0.84	18|189|1579|5244|6510|6529|8529|8564|27165|84647	ABAT|AGXT|CYP4A11|ABCB4|SLC1A5|SLC6A1|CYP4F2|KMO|GLS2|PLA2G12B	-2.9	Input ID
GO-BP	19	GO:0043270	positive regulation of ion transport	-4.6	3.5	5.3	24156	277	370	15	4.1	1	18|335|483|1579|2539|5244|6529|6781|7114|8529|8564|9104|10991|27347|65267	ABAT|APOA1|ATP1B3|CYP4A11|G6PD|ABCB4|SLC6A1|STC1|TMSB4X|CYP4F2|KMO|RGN|SLC38A3|STK39|WNK3	-2.9	Input ID
GO-BP	19	GO:0022408	negative regulation of cell-cell adhesion	-4.6	4.3	5.6	24156	183	370	12	3.2	0.92	18|335|383|5270|5340|5621|6370|9314|10457|11326|27242|84868	ABAT|APOA1|ARG1|SERPINE2|PLG|PRNP|CCL25|KLF4|GPNMB|VSIG4|TNFRSF21|HAVCR2	-2.9	Input ID
GO-BP	19	GO:0032373	positive regulation of sterol transport	-4.6	14	7.7	24156	24	370	5	1.4	0.6	302|335|5244|5360|5444	ANXA2|APOA1|ABCB4|PLTP|PON1	-2.9	Input ID
GO-BP	19	GO:0032376	positive regulation of cholesterol transport	-4.6	14	7.7	24156	24	370	5	1.4	0.6	302|335|5244|5360|5444	ANXA2|APOA1|ABCB4|PLTP|PON1	-2.9	Input ID
GO-BP	19	GO:1903530	regulation of secretion by cell	-4.5	2.4	4.8	24156	777	370	28	7.6	1.4	18|283|335|1361|1992|2207|2822|3091|3162|4321|4851|5066|5217|5552|5950|6513|6514|6659|6696|7036|7097|7114|7128|8564|8754|27242|55107|84868	ABAT|ANG|APOA1|CPB2|SERPINB1|FCER1G|GPLD1|HIF1A|HMOX1|MMP12|NOTCH1|PAM|PFN2|SRGN|RBP4|SLC2A1|SLC2A2|SOX4|SPP1|TFR2|TLR2|TMSB4X|TNFAIP3|KMO|ADAM9|TNFRSF21|ANO1|HAVCR2	-2.8	Input ID
GO-BP	19	GO:0051345	positive regulation of hydrolase activity	-4.5	2.4	4.8	24156	777	370	28	7.6	1.4	229|283|335|344|483|728|2041|2822|3383|3491|3673|3725|4594|4739|5217|5996|5997|6279|6280|6364|6370|7114|7498|9104|23603|23645|50807|112399	ALDOB|ANG|APOA1|APOC2|ATP1B3|C5AR1|EPHA1|GPLD1|ICAM1|CCN1|ITGA2|JUN|MMUT|NEDD9|PFN2|RGS1|RGS2|S100A8|S100A9|CCL20|CCL25|TMSB4X|XDH|RGN|CORO1C|PPP1R15A|ASAP1|EGLN3	-2.8	Input ID
GO-BP	19	GO:0001101	response to acid chemical	-4.5	3.2	5.1	24156	347	370	17	4.6	1.1	383|847|1373|2155|3383|3673|5244|5444|5950|6319|7097|9314|10400|22943|55022|58528|84649	ARG1|CAT|CPS1|F7|ICAM1|ITGA2|ABCB4|PON1|RBP4|SCD|TLR2|KLF4|PEMT|DKK1|PID1|RRAGD|DGAT2	-2.8	Input ID
GO-BP	19	GO:0070664	negative regulation of leukocyte proliferation	-4.5	6.4	6.1	24156	81	370	8	2.2	0.76	383|5621|7128|7305|10457|11326|27242|84868	ARG1|PRNP|TNFAIP3|TYROBP|GPNMB|VSIG4|TNFRSF21|HAVCR2	-2.8	Input ID
GO-BP	19	GO:0007031	peroxisome organization	-4.5	6.4	6.1	24156	81	370	8	2.2	0.76	189|847|1610|1962|5264|8309|11001|51268	AGXT|CAT|DAO|EHHADH|PHYH|ACOX2|SLC27A2|PIPOX	-2.8	Input ID
GO-BP	19	GO:0010896	regulation of triglyceride catabolic process	-4.5	20	8.6	24156	13	370	4	1.1	0.54	335|344|345|2822	APOA1|APOC2|APOC3|GPLD1	-2.8	Input ID
GO-BP	19	GO:0019627	urea metabolic process	-4.5	20	8.6	24156	13	370	4	1.1	0.54	383|1373|1559|10166	ARG1|CPS1|CYP2C9|SLC25A15	-2.8	Input ID
GO-BP	19	GO:0006637	acyl-CoA metabolic process	-4.5	5.6	5.9	24156	105	370	9	2.4	0.8	3158|5538|6319|7923|51268|54988|84649|123876|348158	HMGCS2|PPT1|SCD|HSD17B8|PIPOX|ACSM5|DGAT2|ACSM2A|ACSM2B	-2.8	Input ID
GO-BP	19	GO:0035383	thioester metabolic process	-4.5	5.6	5.9	24156	105	370	9	2.4	0.8	3158|5538|6319|7923|51268|54988|84649|123876|348158	HMGCS2|PPT1|SCD|HSD17B8|PIPOX|ACSM5|DGAT2|ACSM2A|ACSM2B	-2.8	Input ID
GO-BP	19	GO:0061624	fructose catabolic process to hydroxyacetone phosphate and glyceraldehyde-3-phosphate	-4.5	39	11	24156	5	370	3	0.81	0.47	229|3795|132158	ALDOB|KHK|GLYCTK	-2.8	Input ID
GO-BP	19	GO:0010901	regulation of very-low-density lipoprotein particle remodeling	-4.5	39	11	24156	5	370	3	0.81	0.47	335|344|345	APOA1|APOC2|APOC3	-2.8	Input ID
GO-BP	19	GO:0006001	fructose catabolic process	-4.5	39	11	24156	5	370	3	0.81	0.47	229|3795|132158	ALDOB|KHK|GLYCTK	-2.8	Input ID
GO-BP	19	GO:0070948	regulation of neutrophil mediated cytotoxicity	-4.5	39	11	24156	5	370	3	0.81	0.47	383|1776|6372	ARG1|DNASE1L3|CXCL6	-2.8	Input ID
GO-BP	19	GO:0006572	tyrosine catabolic process	-4.5	39	11	24156	5	370	3	0.81	0.47	3081|3242|6898	HGD|HPD|TAT	-2.8	Input ID
GO-BP	19	GO:0010955	negative regulation of protein processing	-4.5	9.6	6.8	24156	41	370	6	1.6	0.66	1361|5054|5270|5345|5621|11326	CPB2|SERPINE1|SERPINE2|SERPINF2|PRNP|VSIG4	-2.8	Input ID
GO-BP	19	GO:1903318	negative regulation of protein maturation	-4.5	9.6	6.8	24156	41	370	6	1.6	0.66	1361|5054|5270|5345|5621|11326	CPB2|SERPINE1|SERPINE2|SERPINF2|PRNP|VSIG4	-2.8	Input ID
GO-BP	19	GO:0090207	regulation of triglyceride metabolic process	-4.5	9.6	6.8	24156	41	370	6	1.6	0.66	335|344|345|2822|9104|84649	APOA1|APOC2|APOC3|GPLD1|RGN|DGAT2	-2.8	Input ID
GO-BP	19	GO:0007584	response to nutrient	-4.4	3.9	5.3	24156	219	370	13	3.5	0.96	335|383|462|847|2155|3162|3673|3939|5313|5315|6696|6781|10400	APOA1|ARG1|SERPINC1|CAT|F7|HMOX1|ITGA2|LDHA|PKLR|PKM|SPP1|STC1|PEMT	-2.8	Input ID
GO-BP	19	GO:0007568	aging	-4.4	3.3	5.1	24156	319	370	16	4.3	1.1	18|133|383|597|847|1075|2353|3383|3725|4316|5054|5621|8564|9104|22943|30001	ABAT|ADM|ARG1|BCL2A1|CAT|CTSC|FOS|ICAM1|JUN|MMP7|SERPINE1|PRNP|KMO|RGN|DKK1|ERO1A	-2.8	Input ID
GO-BP	19	GO:0071333	cellular response to glucose stimulus	-4.4	4.9	5.7	24156	132	370	10	2.7	0.84	1361|1581|2822|3091|3383|3956|5106|6659|51085|55107	CPB2|CYP7A1|GPLD1|HIF1A|ICAM1|LGALS1|PCK2|SOX4|MLXIPL|ANO1	-2.8	Input ID
GO-BP	19	GO:0042180	cellular ketone metabolic process	-4.4	3.6	5.2	24156	252	370	14	3.8	0.99	133|335|344|345|635|1581|2806|3029|8529|8564|9056|9104|51085|84649	ADM|APOA1|APOC2|APOC3|BHMT|CYP7A1|GOT2|HAGH|CYP4F2|KMO|SLC7A7|RGN|MLXIPL|DGAT2	-2.7	Input ID
GO-BP	19	GO:0051051	negative regulation of transport	-4.4	2.6	4.8	24156	543	370	22	5.9	1.2	18|335|344|345|1992|3162|3383|3685|4318|4851|5270|5552|5997|6781|7097|7114|7128|8529|27242|27347|55022|65267	ABAT|APOA1|APOC2|APOC3|SERPINB1|HMOX1|ICAM1|ITGAV|MMP9|NOTCH1|SERPINE2|SRGN|RGS2|STC1|TLR2|TMSB4X|TNFAIP3|CYP4F2|TNFRSF21|STK39|PID1|WNK3	-2.7	Input ID
GO-BP	19	GO:0034655	nucleobase-containing compound catabolic process	-4.4	2.5	4.8	24156	664	370	25	6.8	1.3	226|229|1776|1807|2023|2026|2203|3091|3099|3939|5209|5210|5214|5230|5313|5315|7498|7538|9104|10643|51085|51733|54541|55526|55753	ALDOA|ALDOB|DNASE1L3|DPYS|ENO1|ENO2|FBP1|HIF1A|HK2|LDHA|PFKFB3|PFKFB4|PFKP|PGK1|PKLR|PKM|XDH|ZFP36|RGN|IGF2BP3|MLXIPL|UPB1|DDIT4|DHTKD1|OGDHL	-2.7	Input ID
GO-BP	19	GO:0022617	extracellular matrix disassembly	-4.4	6.3	6	24156	83	370	8	2.2	0.76	960|3818|4312|4316|4318|4321|5340|164656	CD44|KLKB1|MMP1|MMP7|MMP9|MMP12|PLG|TMPRSS6	-2.7	Input ID
GO-BP	19	GO:0042594	response to starvation	-4.4	4.1	5.4	24156	191	370	12	3.2	0.92	133|467|1373|1649|3725|5106|6513|7538|10991|55062|58528|81631	ADM|ATF3|CPS1|DDIT3|JUN|PCK2|SLC2A1|ZFP36|SLC38A3|WIPI1|RRAGD|MAP1LC3B	-2.7	Input ID
GO-BP	19	GO:0055065	metal ion homeostasis	-4.4	2.4	4.7	24156	668	370	25	6.8	1.3	133|302|483|491|728|1579|1649|3091|3162|3263|3685|3827|5621|6279|6280|6781|7036|7852|8529|9104|30001|55013|148738|164656|100133941	ADM|ANXA2|ATP1B3|ATP2B2|C5AR1|CYP4A11|DDIT3|HIF1A|HMOX1|HPX|ITGAV|KNG1|PRNP|S100A8|S100A9|STC1|TFR2|CXCR4|CYP4F2|RGN|ERO1A|MCUB|HJV|TMPRSS6|CD24	-2.7	Input ID
GO-BP	19	GO:0071331	cellular response to hexose stimulus	-4.4	4.9	5.6	24156	134	370	10	2.7	0.84	1361|1581|2822|3091|3383|3956|5106|6659|51085|55107	CPB2|CYP7A1|GPLD1|HIF1A|ICAM1|LGALS1|PCK2|SOX4|MLXIPL|ANO1	-2.7	Input ID
GO-BP	19	GO:0097193	intrinsic apoptotic signaling pathway	-4.4	3.4	5.1	24156	289	370	15	4.1	1	597|960|1649|1687|2023|3091|3162|4318|5329|6279|6280|23645|30001|54541|100133941	BCL2A1|CD44|DDIT3|GSDME|ENO1|HIF1A|HMOX1|MMP9|PLAUR|S100A8|S100A9|PPP1R15A|ERO1A|DDIT4|CD24	-2.7	Input ID
GO-BP	19	GO:0010631	epithelial cell migration	-4.4	3.1	5	24156	359	370	17	4.6	1.1	335|1839|2822|3091|3162|3273|3673|3725|4318|4851|5217|6781|7114|8754|9314|23603|54443	APOA1|HBEGF|GPLD1|HIF1A|HMOX1|HRG|ITGA2|JUN|MMP9|NOTCH1|PFN2|STC1|TMSB4X|ADAM9|KLF4|CORO1C|ANLN	-2.7	Input ID
GO-BP	19	GO:0071326	cellular response to monosaccharide stimulus	-4.3	4.8	5.6	24156	135	370	10	2.7	0.84	1361|1581|2822|3091|3383|3956|5106|6659|51085|55107	CPB2|CYP7A1|GPLD1|HIF1A|ICAM1|LGALS1|PCK2|SOX4|MLXIPL|ANO1	-2.7	Input ID
GO-BP	19	GO:1901342	regulation of vasculature development	-4.3	2.9	4.9	24156	434	370	19	5.1	1.1	133|728|729|2041|3091|3099|3162|3273|3570|4851|5054|5230|5315|7128|7498|7852|9314|10457|23670	ADM|C5AR1|C6|EPHA1|HIF1A|HK2|HMOX1|HRG|IL6R|NOTCH1|SERPINE1|PGK1|PKM|TNFAIP3|XDH|CXCR4|KLF4|GPNMB|CEMIP2	-2.7	Input ID
GO-BP	19	GO:0046463	acylglycerol biosynthetic process	-4.3	9.1	6.6	24156	43	370	6	1.6	0.66	283|2822|5106|9104|80168|84649	ANG|GPLD1|PCK2|RGN|MOGAT2|DGAT2	-2.7	Input ID
GO-BP	19	GO:0046460	neutral lipid biosynthetic process	-4.3	9.1	6.6	24156	43	370	6	1.6	0.66	283|2822|5106|9104|80168|84649	ANG|GPLD1|PCK2|RGN|MOGAT2|DGAT2	-2.7	Input ID
GO-BP	19	GO:0050667	homocysteine metabolic process	-4.3	19	8.2	24156	14	370	4	1.1	0.54	635|1373|4594|7263	BHMT|CPS1|MMUT|TST	-2.7	Input ID
GO-BP	19	GO:0071941	nitrogen cycle metabolic process	-4.3	19	8.2	24156	14	370	4	1.1	0.54	383|1373|1559|10166	ARG1|CPS1|CYP2C9|SLC25A15	-2.7	Input ID
GO-BP	19	GO:0020027	hemoglobin metabolic process	-4.3	19	8.2	24156	14	370	4	1.1	0.54	847|3091|3263|9314	CAT|HIF1A|HPX|KLF4	-2.7	Input ID
GO-BP	19	GO:0043650	dicarboxylic acid biosynthetic process	-4.3	19	8.2	24156	14	370	4	1.1	0.54	2806|8564|23498|27165	GOT2|KMO|HAAO|GLS2	-2.7	Input ID
GO-BP	19	GO:0043410	positive regulation of MAPK cascade	-4.3	2.6	4.7	24156	552	370	22	5.9	1.2	728|960|1687|1847|1848|1880|3383|3486|3725|4851|5345|6364|6370|7498|7852|8754|9518|10457|22943|27347|84868|100133941	C5AR1|CD44|GSDME|DUSP5|DUSP6|GPR183|ICAM1|IGFBP3|JUN|NOTCH1|SERPINF2|CCL20|CCL25|XDH|CXCR4|ADAM9|GDF15|GPNMB|DKK1|STK39|HAVCR2|CD24	-2.7	Input ID
GO-BP	19	GO:0090132	epithelium migration	-4.3	3.1	4.9	24156	362	370	17	4.6	1.1	335|1839|2822|3091|3162|3273|3673|3725|4318|4851|5217|6781|7114|8754|9314|23603|54443	APOA1|HBEGF|GPLD1|HIF1A|HMOX1|HRG|ITGA2|JUN|MMP9|NOTCH1|PFN2|STC1|TMSB4X|ADAM9|KLF4|CORO1C|ANLN	-2.7	Input ID
GO-BP	19	GO:0046916	cellular transition metal ion homeostasis	-4.3	5.3	5.7	24156	110	370	9	2.4	0.8	3091|3162|3263|5621|6279|6280|7036|148738|164656	HIF1A|HMOX1|HPX|PRNP|S100A8|S100A9|TFR2|HJV|TMPRSS6	-2.6	Input ID
GO-BP	19	GO:0001909	leukocyte mediated cytotoxicity	-4.3	5.3	5.7	24156	110	370	9	2.4	0.8	383|563|1075|1776|3383|5272|6372|7305|84868	ARG1|AZGP1|CTSC|DNASE1L3|ICAM1|SERPINB9|CXCL6|TYROBP|HAVCR2	-2.6	Input ID
GO-BP	19	GO:0001525	angiogenesis	-4.3	2.5	4.7	24156	594	370	23	6.2	1.3	133|283|302|728|729|2041|2822|3091|3099|3162|3273|3491|3685|3725|4851|5054|5230|5315|7128|7852|9314|10457|23670	ADM|ANG|ANXA2|C5AR1|C6|EPHA1|GPLD1|HIF1A|HK2|HMOX1|HRG|CCN1|ITGAV|JUN|NOTCH1|SERPINE1|PGK1|PKM|TNFAIP3|CXCR4|KLF4|GPNMB|CEMIP2	-2.6	Input ID
GO-BP	19	GO:0043687	post-translational protein modification	-4.3	3	4.9	24156	364	370	17	4.6	1.1	335|462|1462|2822|3091|3486|3491|3698|3827|3912|3956|5624|5768|6694|6696|51156|51280	APOA1|SERPINC1|VCAN|GPLD1|HIF1A|IGFBP3|CCN1|ITIH2|KNG1|LAMB1|LGALS1|PROC|QSOX1|SPP2|SPP1|SERPINA10|GOLM1	-2.6	Input ID
GO-BP	19	GO:0003333	amino acid transmembrane transport	-4.3	6.1	5.9	24156	86	370	8	2.2	0.76	5997|6510|6535|9056|10166|10991|27347|81539	RGS2|SLC1A5|SLC6A8|SLC7A7|SLC25A15|SLC38A3|STK39|SLC38A1	-2.6	Input ID
GO-BP	19	GO:0006875	cellular metal ion homeostasis	-4.3	2.5	4.7	24156	596	370	23	6.2	1.3	133|302|483|491|728|1649|3091|3162|3263|3685|3827|5621|6279|6280|6781|7036|7852|9104|30001|55013|148738|164656|100133941	ADM|ANXA2|ATP1B3|ATP2B2|C5AR1|DDIT3|HIF1A|HMOX1|HPX|ITGAV|KNG1|PRNP|S100A8|S100A9|STC1|TFR2|CXCR4|RGN|ERO1A|MCUB|HJV|TMPRSS6|CD24	-2.6	Input ID
GO-BP	19	GO:0032371	regulation of sterol transport	-4.3	7.1	6.1	24156	64	370	7	1.9	0.71	302|335|344|345|5244|5360|5444	ANXA2|APOA1|APOC2|APOC3|ABCB4|PLTP|PON1	-2.6	Input ID
GO-BP	19	GO:0060135	maternal process involved in female pregnancy	-4.3	7.1	6.1	24156	64	370	7	1.9	0.71	383|4316|5066|5997|6696|6781|84868	ARG1|MMP7|PAM|RGS2|SPP1|STC1|HAVCR2	-2.6	Input ID
GO-BP	19	GO:0032374	regulation of cholesterol transport	-4.3	7.1	6.1	24156	64	370	7	1.9	0.71	302|335|344|345|5244|5360|5444	ANXA2|APOA1|APOC2|APOC3|ABCB4|PLTP|PON1	-2.6	Input ID
GO-BP	19	GO:0046677	response to antibiotic	-4.2	3.2	4.9	24156	331	370	16	4.3	1.1	18|383|847|2539|2806|3162|3383|3725|3939|5950|5997|6279|7128|8754|9314|10400	ABAT|ARG1|CAT|G6PD|GOT2|HMOX1|ICAM1|JUN|LDHA|RBP4|RGS2|S100A8|TNFAIP3|ADAM9|KLF4|PEMT	-2.6	Input ID
GO-BP	19	GO:0033865	nucleoside bisphosphate metabolic process	-4.2	4.7	5.5	24156	139	370	10	2.7	0.84	3158|5538|6319|7923|51268|53354|54988|84649|123876|348158	HMGCS2|PPT1|SCD|HSD17B8|PIPOX|PANK1|ACSM5|DGAT2|ACSM2A|ACSM2B	-2.6	Input ID
GO-BP	19	GO:0034032	purine nucleoside bisphosphate metabolic process	-4.2	4.7	5.5	24156	139	370	10	2.7	0.84	3158|5538|6319|7923|51268|53354|54988|84649|123876|348158	HMGCS2|PPT1|SCD|HSD17B8|PIPOX|PANK1|ACSM5|DGAT2|ACSM2A|ACSM2B	-2.6	Input ID
GO-BP	19	GO:0033875	ribonucleoside bisphosphate metabolic process	-4.2	4.7	5.5	24156	139	370	10	2.7	0.84	3158|5538|6319|7923|51268|53354|54988|84649|123876|348158	HMGCS2|PPT1|SCD|HSD17B8|PIPOX|PANK1|ACSM5|DGAT2|ACSM2A|ACSM2B	-2.6	Input ID
GO-BP	19	GO:1901654	response to ketone	-4.2	4	5.2	24156	198	370	12	3.2	0.92	383|768|1373|2155|2353|3383|5106|5244|6696|7097|9314|54541	ARG1|CA9|CPS1|F7|FOS|ICAM1|PCK2|ABCB4|SPP1|TLR2|KLF4|DDIT4	-2.6	Input ID
GO-BP	19	GO:0090130	tissue migration	-4.2	3	4.9	24156	368	370	17	4.6	1.1	335|1839|2822|3091|3162|3273|3673|3725|4318|4851|5217|6781|7114|8754|9314|23603|54443	APOA1|HBEGF|GPLD1|HIF1A|HMOX1|HRG|ITGA2|JUN|MMP9|NOTCH1|PFN2|STC1|TMSB4X|ADAM9|KLF4|CORO1C|ANLN	-2.6	Input ID
GO-BP	19	GO:0010632	regulation of epithelial cell migration	-4.2	3.3	5	24156	297	370	15	4.1	1	1839|2822|3091|3162|3273|3673|3725|4318|4851|5217|6781|7114|8754|9314|23603	HBEGF|GPLD1|HIF1A|HMOX1|HRG|ITGA2|JUN|MMP9|NOTCH1|PFN2|STC1|TMSB4X|ADAM9|KLF4|CORO1C	-2.6	Input ID
GO-BP	19	GO:0019835	cytolysis	-4.2	12	7	24156	28	370	5	1.4	0.6	729|732|3273|4069|23531	C6|C8B|HRG|LYZ|MMD	-2.6	Input ID
GO-BP	19	GO:0009065	glutamine family amino acid catabolic process	-4.2	12	7	24156	28	370	5	1.4	0.6	383|1610|2806|27165|137872	ARG1|DAO|GOT2|GLS2|ADHFE1	-2.6	Input ID
GO-BP	19	GO:0032963	collagen metabolic process	-4.2	5.2	5.6	24156	113	370	9	2.4	0.8	383|3091|3673|4312|4316|4318|4321|5345|164656	ARG1|HIF1A|ITGA2|MMP1|MMP7|MMP9|MMP12|SERPINF2|TMPRSS6	-2.6	Input ID
GO-BP	19	GO:0048660	regulation of smooth muscle cell proliferation	-4.2	4.2	5.3	24156	169	370	11	3	0.88	283|1839|3162|3486|3570|3673|3725|4318|5345|7128|9314	ANG|HBEGF|HMOX1|IGFBP3|IL6R|ITGA2|JUN|MMP9|SERPINF2|TNFAIP3|KLF4	-2.6	Input ID
GO-BP	19	GO:0002683	negative regulation of immune system process	-4.2	2.7	4.7	24156	483	370	20	5.4	1.2	335|383|714|2207|3162|4321|4851|5272|5621|6370|7107|7128|7305|7538|10457|11326|23643|27242|84868|114770	APOA1|ARG1|C1QC|FCER1G|HMOX1|MMP12|NOTCH1|SERPINB9|PRNP|CCL25|GPR137B|TNFAIP3|TYROBP|ZFP36|GPNMB|VSIG4|LY96|TNFRSF21|HAVCR2|PGLYRP2	-2.6	Input ID
GO-BP	19	GO:0040008	regulation of growth	-4.2	2.4	4.6	24156	686	370	25	6.8	1.3	1808|1839|1848|2023|2203|2539|2593|3091|3273|3486|4739|4851|5270|5538|5950|5997|6279|6280|6696|7086|7852|9518|22883|29948|29967	DPYSL2|HBEGF|DUSP6|ENO1|FBP1|G6PD|GAMT|HIF1A|HRG|IGFBP3|NEDD9|NOTCH1|SERPINE2|PPT1|RBP4|RGS2|S100A8|S100A9|SPP1|TKT|CXCR4|GDF15|CLSTN1|OSGIN1|LRP12	-2.6	Input ID
GO-BP	19	GO:1904018	positive regulation of vasculature development	-4.2	3.6	5.1	24156	233	370	13	3.5	0.96	133|728|729|2041|3091|3099|3162|3570|4851|5054|5315|7852|9314	ADM|C5AR1|C6|EPHA1|HIF1A|HK2|HMOX1|IL6R|NOTCH1|SERPINE1|PKM|CXCR4|KLF4	-2.5	Input ID
GO-BP	19	GO:1901523	icosanoid catabolic process	-4.2	33	9.7	24156	6	370	3	0.81	0.47	1579|4051|8529	CYP4A11|CYP4F3|CYP4F2	-2.5	Input ID
GO-BP	19	GO:0048659	smooth muscle cell proliferation	-4.2	4.2	5.2	24156	171	370	11	3	0.88	283|1839|3162|3486|3570|3673|3725|4318|5345|7128|9314	ANG|HBEGF|HMOX1|IGFBP3|IL6R|ITGA2|JUN|MMP9|SERPINF2|TNFAIP3|KLF4	-2.5	Input ID
GO-BP	19	GO:0033559	unsaturated fatty acid metabolic process	-4.1	5.1	5.5	24156	115	370	9	2.4	0.8	241|1548|1549|1559|1579|4051|6319|8529|8824	ALOX5AP|CYP2A6|CYP2A7|CYP2C9|CYP4A11|CYP4F3|SCD|CYP4F2|CES2	-2.5	Input ID
GO-BP	19	GO:0050866	negative regulation of cell activation	-4.1	3.9	5.1	24156	203	370	12	3.2	0.92	18|383|3162|5270|5621|7128|7305|10457|11326|27242|84868|114770	ABAT|ARG1|HMOX1|SERPINE2|PRNP|TNFAIP3|TYROBP|GPNMB|VSIG4|TNFRSF21|HAVCR2|PGLYRP2	-2.5	Input ID
GO-BP	19	GO:0008206	bile acid metabolic process	-4.1	8.3	6.3	24156	47	370	6	1.6	0.66	1581|1593|6718|8309|10998|11001	CYP7A1|CYP27A1|AKR1D1|ACOX2|SLC27A5|SLC27A2	-2.5	Input ID
GO-BP	19	GO:0071827	plasma lipoprotein particle organization	-4.1	8.3	6.3	24156	47	370	6	1.6	0.66	335|344|345|4018|5360|5444	APOA1|APOC2|APOC3|LPA|PLTP|PON1	-2.5	Input ID
GO-BP	19	GO:0015807	L-amino acid transport	-4.1	6.7	5.9	24156	68	370	7	1.9	0.71	383|5997|6510|9056|10166|10991|81539	ARG1|RGS2|SLC1A5|SLC7A7|SLC25A15|SLC38A3|SLC38A1	-2.5	Input ID
GO-BP	19	GO:0050708	regulation of protein secretion	-4.1	2.7	4.6	24156	492	370	20	5.4	1.2	18|283|335|1992|2822|3091|4321|5066|5552|5950|6513|6514|6659|7097|7114|7128|8754|27242|55107|84868	ABAT|ANG|APOA1|SERPINB1|GPLD1|HIF1A|MMP12|PAM|SRGN|RBP4|SLC2A1|SLC2A2|SOX4|TLR2|TMSB4X|TNFAIP3|ADAM9|TNFRSF21|ANO1|HAVCR2	-2.5	Input ID
GO-BP	19	GO:1900542	regulation of purine nucleotide metabolic process	-4.1	4.5	5.3	24156	145	370	10	2.7	0.84	2023|2203|3091|5209|5210|5230|7114|51085|54541|55022	ENO1|FBP1|HIF1A|PFKFB3|PFKFB4|PGK1|TMSB4X|MLXIPL|DDIT4|PID1	-2.5	Input ID
GO-BP	19	GO:0009306	protein secretion	-4.1	2.4	4.5	24156	614	370	23	6.2	1.3	18|283|335|1992|2822|3091|3685|4321|4851|5066|5552|5950|6513|6514|6659|7097|7114|7128|8754|27242|55107|84868|93145	ABAT|ANG|APOA1|SERPINB1|GPLD1|HIF1A|ITGAV|MMP12|NOTCH1|PAM|SRGN|RBP4|SLC2A1|SLC2A2|SOX4|TLR2|TMSB4X|TNFAIP3|ADAM9|TNFRSF21|ANO1|HAVCR2|OLFM2	-2.5	Input ID
GO-BP	19	GO:0006103	2-oxoglutarate metabolic process	-4.1	16	7.6	24156	16	370	4	1.1	0.54	2806|5264|6898|137872	GOT2|PHYH|TAT|ADHFE1	-2.5	Input ID
GO-BP	19	GO:0042908	xenobiotic transport	-4.1	16	7.6	24156	16	370	4	1.1	0.54	4363|6513|6529|8856	ABCC1|SLC2A1|SLC6A1|NR1I2	-2.5	Input ID
GO-BP	19	GO:1900371	regulation of purine nucleotide biosynthetic process	-4.1	5	5.4	24156	118	370	9	2.4	0.8	2023|2203|3091|5209|5210|7114|51085|54541|55022	ENO1|FBP1|HIF1A|PFKFB3|PFKFB4|TMSB4X|MLXIPL|DDIT4|PID1	-2.4	Input ID
GO-BP	19	GO:0070372	regulation of ERK1 and ERK2 cascade	-4	3.2	4.8	24156	308	370	15	4.1	1	467|728|960|1848|1880|3383|3491|3725|4851|5345|6364|6370|9314|10457|84868	ATF3|C5AR1|CD44|DUSP6|GPR183|ICAM1|CCN1|JUN|NOTCH1|SERPINF2|CCL20|CCL25|KLF4|GPNMB|HAVCR2	-2.4	Input ID
GO-BP	19	GO:0033002	muscle cell proliferation	-4	3.5	4.9	24156	240	370	13	3.5	0.96	283|1839|3162|3486|3570|3673|3725|4318|4851|5345|5950|7128|9314	ANG|HBEGF|HMOX1|IGFBP3|IL6R|ITGA2|JUN|MMP9|NOTCH1|SERPINF2|RBP4|TNFAIP3|KLF4	-2.4	Input ID
GO-BP	19	GO:0030808	regulation of nucleotide biosynthetic process	-4	4.9	5.4	24156	119	370	9	2.4	0.8	2023|2203|3091|5209|5210|7114|51085|54541|55022	ENO1|FBP1|HIF1A|PFKFB3|PFKFB4|TMSB4X|MLXIPL|DDIT4|PID1	-2.4	Input ID
GO-BP	19	GO:0006109	regulation of carbohydrate metabolic process	-4	3.8	5	24156	208	370	12	3.2	0.92	2203|2822|3091|3486|3795|5209|5210|9104|27232|51085|54541|84649	FBP1|GPLD1|HIF1A|IGFBP3|KHK|PFKFB3|PFKFB4|RGN|GNMT|MLXIPL|DDIT4|DGAT2	-2.4	Input ID
GO-BP	19	GO:0001906	cell killing	-4	4.1	5.1	24156	177	370	11	3	0.88	383|563|1075|1776|3273|3383|4069|5272|6372|7305|84868	ARG1|AZGP1|CTSC|DNASE1L3|HRG|ICAM1|LYZ|SERPINB9|CXCL6|TYROBP|HAVCR2	-2.4	Input ID
GO-BP	19	GO:0045834	positive regulation of lipid metabolic process	-4	4.4	5.2	24156	148	370	10	2.7	0.84	133|335|344|1581|2822|3491|9104|51085|84649|345275	ADM|APOA1|APOC2|CYP7A1|GPLD1|CCN1|RGN|MLXIPL|DGAT2|HSD17B13	-2.4	Input ID
GO-BP	19	GO:0055080	cation homeostasis	-4	2.3	4.4	24156	748	370	26	7	1.3	133|302|483|491|728|1579|1649|3091|3162|3263|3685|3827|5538|5621|6279|6280|6781|7036|7852|8529|9104|30001|55013|148738|164656|100133941	ADM|ANXA2|ATP1B3|ATP2B2|C5AR1|CYP4A11|DDIT3|HIF1A|HMOX1|HPX|ITGAV|KNG1|PPT1|PRNP|S100A8|S100A9|STC1|TFR2|CXCR4|CYP4F2|RGN|ERO1A|MCUB|HJV|TMPRSS6|CD24	-2.4	Input ID
GO-BP	19	GO:0007595	lactation	-4	8	6.1	24156	49	370	6	1.6	0.66	462|2806|3091|3099|5066|7498	SERPINC1|GOT2|HIF1A|HK2|PAM|XDH	-2.4	Input ID
GO-BP	19	GO:0022407	regulation of cell-cell adhesion	-4	2.8	4.6	24156	422	370	18	4.9	1.1	18|335|383|960|3383|3956|5270|5329|5340|5345|5621|6370|9314|10457|11326|27242|84868|100133941	ABAT|APOA1|ARG1|CD44|ICAM1|LGALS1|SERPINE2|PLAUR|PLG|SERPINF2|PRNP|CCL25|KLF4|GPNMB|VSIG4|TNFRSF21|HAVCR2|CD24	-2.4	Input ID
GO-BP	19	GO:0006140	regulation of nucleotide metabolic process	-4	4.4	5.2	24156	149	370	10	2.7	0.84	2023|2203|3091|5209|5210|5230|7114|51085|54541|55022	ENO1|FBP1|HIF1A|PFKFB3|PFKFB4|PGK1|TMSB4X|MLXIPL|DDIT4|PID1	-2.4	Input ID
GO-BP	19	GO:0031341	regulation of cell killing	-4	5.5	5.5	24156	95	370	8	2.2	0.76	383|563|1776|3383|5272|6372|7305|84868	ARG1|AZGP1|DNASE1L3|ICAM1|SERPINB9|CXCL6|TYROBP|HAVCR2	-2.4	Input ID
GO-BP	19	GO:0034384	high-density lipoprotein particle clearance	-4	15	7.4	24156	17	370	4	1.1	0.54	335|344|345|2822	APOA1|APOC2|APOC3|GPLD1	-2.4	Input ID
GO-BP	19	GO:0034375	high-density lipoprotein particle remodeling	-4	15	7.4	24156	17	370	4	1.1	0.54	335|344|345|5360	APOA1|APOC2|APOC3|PLTP	-2.4	Input ID
GO-BP	19	GO:0046459	short-chain fatty acid metabolic process	-4	15	7.4	24156	17	370	4	1.1	0.54	4594|5106|5264|7915	MMUT|PCK2|PHYH|ALDH5A1	-2.4	Input ID
GO-BP	19	GO:0046500	S-adenosylmethionine metabolic process	-4	15	7.4	24156	17	370	4	1.1	0.54	635|4143|10400|27232	BHMT|MAT1A|PEMT|GNMT	-2.4	Input ID
GO-BP	19	GO:0043408	regulation of MAPK cascade	-3.9	2.3	4.4	24156	754	370	26	7	1.3	467|728|960|1687|1847|1848|1880|3383|3486|3491|3725|4851|5345|5997|6364|6370|7498|7852|8754|9314|9518|10457|22943|27347|84868|100133941	ATF3|C5AR1|CD44|GSDME|DUSP5|DUSP6|GPR183|ICAM1|IGFBP3|CCN1|JUN|NOTCH1|SERPINF2|RGS2|CCL20|CCL25|XDH|CXCR4|ADAM9|KLF4|GDF15|GPNMB|DKK1|STK39|HAVCR2|CD24	-2.3	Input ID
GO-BP	19	GO:0042116	macrophage activation	-3.9	5.4	5.4	24156	96	370	8	2.2	0.76	728|1075|3725|7097|7107|7305|11326|84868	C5AR1|CTSC|JUN|TLR2|GPR137B|TYROBP|VSIG4|HAVCR2	-2.3	Input ID
GO-BP	19	GO:0015908	fatty acid transport	-3.9	5.4	5.4	24156	96	370	8	2.2	0.76	123|1579|2806|8529|10998|11000|11001|84647	PLIN2|CYP4A11|GOT2|CYP4F2|SLC27A5|SLC27A3|SLC27A2|PLA2G12B	-2.3	Input ID
GO-BP	19	GO:0030003	cellular cation homeostasis	-3.9	2.3	4.4	24156	672	370	24	6.5	1.3	133|302|483|491|728|1649|3091|3162|3263|3685|3827|5538|5621|6279|6280|6781|7036|7852|9104|30001|55013|148738|164656|100133941	ADM|ANXA2|ATP1B3|ATP2B2|C5AR1|DDIT3|HIF1A|HMOX1|HPX|ITGAV|KNG1|PPT1|PRNP|S100A8|S100A9|STC1|TFR2|CXCR4|RGN|ERO1A|MCUB|HJV|TMPRSS6|CD24	-2.3	Input ID
GO-BP	19	GO:1901216	positive regulation of neuron death	-3.9	5.4	5.4	24156	97	370	8	2.2	0.76	1649|2353|3725|5621|7305|8564|22943|54541	DDIT3|FOS|JUN|PRNP|TYROBP|KMO|DKK1|DDIT4	-2.3	Input ID
GO-BP	19	GO:1990869	cellular response to chemokine	-3.9	5.4	5.4	24156	97	370	8	2.2	0.76	3091|4015|6364|6370|6372|6374|7852|27347	HIF1A|LOX|CCL20|CCL25|CXCL6|CXCL5|CXCR4|STK39	-2.3	Input ID
GO-BP	19	GO:1990868	response to chemokine	-3.9	5.4	5.4	24156	97	370	8	2.2	0.76	3091|4015|6364|6370|6372|6374|7852|27347	HIF1A|LOX|CCL20|CCL25|CXCL6|CXCL5|CXCR4|STK39	-2.3	Input ID
GO-BP	19	GO:0071825	protein-lipid complex subunit organization	-3.9	7.7	6	24156	51	370	6	1.6	0.66	335|344|345|4018|5360|5444	APOA1|APOC2|APOC3|LPA|PLTP|PON1	-2.3	Input ID
GO-BP	19	GO:0098771	inorganic ion homeostasis	-3.9	2.2	4.3	24156	759	370	26	7	1.3	133|302|483|491|728|1579|1649|3091|3162|3263|3685|3827|5538|5621|6279|6280|6781|7036|7852|8529|9104|30001|55013|148738|164656|100133941	ADM|ANXA2|ATP1B3|ATP2B2|C5AR1|CYP4A11|DDIT3|HIF1A|HMOX1|HPX|ITGAV|KNG1|PPT1|PRNP|S100A8|S100A9|STC1|TFR2|CXCR4|CYP4F2|RGN|ERO1A|MCUB|HJV|TMPRSS6|CD24	-2.3	Input ID
GO-BP	19	GO:1901214	regulation of neuron death	-3.9	3.1	4.7	24156	318	370	15	4.1	1	728|1649|2353|2539|3091|3162|3725|5538|5621|7305|8564|10457|22943|54541|112399	C5AR1|DDIT3|FOS|G6PD|HIF1A|HMOX1|JUN|PPT1|PRNP|TYROBP|KMO|GPNMB|DKK1|DDIT4|EGLN3	-2.3	Input ID
GO-BP	19	GO:0010810	regulation of cell-substrate adhesion	-3.9	3.6	4.9	24156	215	370	12	3.2	0.92	335|2041|3273|3491|3956|4321|4739|4851|5054|5340|6370|23603	APOA1|EPHA1|HRG|CCN1|LGALS1|MMP12|NEDD9|NOTCH1|SERPINE1|PLG|CCL25|CORO1C	-2.3	Input ID
GO-BP	19	GO:0045765	regulation of angiogenesis	-3.9	2.8	4.6	24156	392	370	17	4.6	1.1	133|728|729|2041|3091|3099|3162|3273|4851|5054|5230|5315|7128|7852|9314|10457|23670	ADM|C5AR1|C6|EPHA1|HIF1A|HK2|HMOX1|HRG|NOTCH1|SERPINE1|PGK1|PKM|TNFAIP3|CXCR4|KLF4|GPNMB|CEMIP2	-2.3	Input ID
GO-BP	19	GO:0070997	neuron death	-3.9	2.9	4.6	24156	355	370	16	4.3	1.1	728|1649|2353|2539|3091|3162|3725|5538|5621|7305|8564|10457|22943|27242|54541|112399	C5AR1|DDIT3|FOS|G6PD|HIF1A|HMOX1|JUN|PPT1|PRNP|TYROBP|KMO|GPNMB|DKK1|TNFRSF21|DDIT4|EGLN3	-2.3	Input ID
GO-BP	19	GO:0043620	regulation of DNA-templated transcription in response to stress	-3.9	4.7	5.2	24156	125	370	9	2.4	0.8	467|768|1649|3091|3162|3725|4851|56892|112399	ATF3|CA9|DDIT3|HIF1A|HMOX1|JUN|NOTCH1|TCIM|EGLN3	-2.3	Input ID
GO-BP	19	GO:0010039	response to iron ion	-3.9	9.9	6.4	24156	33	370	5	1.4	0.6	18|2539|3091|3162|7036	ABAT|G6PD|HIF1A|HMOX1|TFR2	-2.3	Input ID
GO-BP	19	GO:0010984	regulation of lipoprotein particle clearance	-3.9	9.9	6.4	24156	33	370	5	1.4	0.6	302|344|345|2822|29116	ANXA2|APOC2|APOC3|GPLD1|MYLIP	-2.3	Input ID
GO-BP	19	GO:0019433	triglyceride catabolic process	-3.9	9.9	6.4	24156	33	370	5	1.4	0.6	335|344|345|1373|2822	APOA1|APOC2|APOC3|CPS1|GPLD1	-2.3	Input ID
GO-BP	19	GO:0045926	negative regulation of growth	-3.9	3.4	4.7	24156	250	370	13	3.5	0.96	2023|2203|2539|3091|3273|4851|5270|5538|5950|5997|6696|9518|29948	ENO1|FBP1|G6PD|HIF1A|HRG|NOTCH1|SERPINE2|PPT1|RBP4|RGS2|SPP1|GDF15|OSGIN1	-2.3	Input ID
GO-BP	19	GO:0051957	positive regulation of amino acid transport	-3.9	15	7.2	24156	18	370	4	1.1	0.54	18|6529|8564|10991	ABAT|SLC6A1|KMO|SLC38A3	-2.3	Input ID
GO-BP	19	GO:0060191	regulation of lipase activity	-3.8	5.3	5.3	24156	99	370	8	2.2	0.76	283|335|344|345|728|3491|5538|5997	ANG|APOA1|APOC2|APOC3|C5AR1|CCN1|PPT1|RGS2	-2.3	Input ID
GO-BP	19	GO:0097327	response to antineoplastic agent	-3.8	5.3	5.3	24156	99	370	8	2.2	0.76	383|1373|2155|3162|3383|5106|8754|54541	ARG1|CPS1|F7|HMOX1|ICAM1|PCK2|ADAM9|DDIT4	-2.3	Input ID
GO-BP	19	GO:0030100	regulation of endocytosis	-3.8	3.2	4.7	24156	286	370	14	3.8	0.99	302|335|344|345|1601|2207|3673|3685|5054|5538|7036|7097|11031|22943	ANXA2|APOA1|APOC2|APOC3|DAB2|FCER1G|ITGA2|ITGAV|SERPINE1|PPT1|TFR2|TLR2|RAB31|DKK1	-2.3	Input ID
GO-BP	19	GO:1901653	cellular response to peptide	-3.8	2.8	4.5	24156	397	370	17	4.6	1.1	383|1373|2538|2822|3383|4363|5106|5313|5315|5621|9314|9518|11031|23433|28999|55022|55107	ARG1|CPS1|G6PC|GPLD1|ICAM1|ABCC1|PCK2|PKLR|PKM|PRNP|KLF4|GDF15|RAB31|RHOQ|KLF15|PID1|ANO1	-2.2	Input ID
GO-BP	19	GO:0050672	negative regulation of lymphocyte proliferation	-3.8	6.1	5.5	24156	75	370	7	1.9	0.71	383|5621|7305|10457|11326|27242|84868	ARG1|PRNP|TYROBP|GPNMB|VSIG4|TNFRSF21|HAVCR2	-2.2	Input ID
GO-BP	19	GO:0009896	positive regulation of catabolic process	-3.8	2.7	4.5	24156	436	370	18	4.9	1.1	335|344|665|1075|1601|2822|3091|3099|3162|5209|5210|7128|7538|8754|9104|29116|51085|79888	APOA1|APOC2|BNIP3L|CTSC|DAB2|GPLD1|HIF1A|HK2|HMOX1|PFKFB3|PFKFB4|TNFAIP3|ZFP36|ADAM9|RGN|MYLIP|MLXIPL|LPCAT1	-2.2	Input ID
GO-BP	19	GO:0030593	neutrophil chemotaxis	-3.8	5.2	5.3	24156	100	370	8	2.2	0.76	728|2207|6279|6280|6364|6370|6372|6374	C5AR1|FCER1G|S100A8|S100A9|CCL20|CCL25|CXCL6|CXCL5	-2.2	Input ID
GO-BP	19	GO:1901570	fatty acid derivative biosynthetic process	-3.8	5.2	5.3	24156	100	370	8	2.2	0.76	241|622|1559|3158|5538|6319|7923|10998	ALOX5AP|BDH1|CYP2C9|HMGCS2|PPT1|SCD|HSD17B8|SLC27A5	-2.2	Input ID
GO-BP	19	GO:0009066	aspartate family amino acid metabolic process	-3.8	7.4	5.8	24156	53	370	6	1.6	0.66	635|2806|4143|5352|27232|51268	BHMT|GOT2|MAT1A|PLOD2|GNMT|PIPOX	-2.2	Input ID
GO-BP	19	GO:0045471	response to ethanol	-3.8	4.6	5.1	24156	128	370	9	2.4	0.8	18|847|2539|2806|3383|5950|5997|6279|10400	ABAT|CAT|G6PD|GOT2|ICAM1|RBP4|RGS2|S100A8|PEMT	-2.2	Input ID
GO-BP	19	GO:0006873	cellular ion homeostasis	-3.8	2.3	4.3	24156	685	370	24	6.5	1.3	133|302|483|491|728|1649|3091|3162|3263|3685|3827|5538|5621|6279|6280|6781|7036|7852|9104|30001|55013|148738|164656|100133941	ADM|ANXA2|ATP1B3|ATP2B2|C5AR1|DDIT3|HIF1A|HMOX1|HPX|ITGAV|KNG1|PPT1|PRNP|S100A8|S100A9|STC1|TFR2|CXCR4|RGN|ERO1A|MCUB|HJV|TMPRSS6|CD24	-2.2	Input ID
GO-BP	19	GO:0032945	negative regulation of mononuclear cell proliferation	-3.8	6	5.5	24156	76	370	7	1.9	0.71	383|5621|7305|10457|11326|27242|84868	ARG1|PRNP|TYROBP|GPNMB|VSIG4|TNFRSF21|HAVCR2	-2.2	Input ID
GO-BP	19	GO:0150076	neuroinflammatory response	-3.8	6	5.5	24156	76	370	7	1.9	0.71	728|1075|3725|4318|7097|7305|25825	C5AR1|CTSC|JUN|MMP9|TLR2|TYROBP|BACE2	-2.2	Input ID
GO-BP	19	GO:0010043	response to zinc ion	-3.8	7.3	5.7	24156	54	370	6	1.6	0.66	383|1373|3795|5066|6279|23498	ARG1|CPS1|KHK|PAM|S100A8|HAAO	-2.2	Input ID
GO-BP	19	GO:1902475	L-alpha-amino acid transmembrane transport	-3.8	7.3	5.7	24156	54	370	6	1.6	0.66	5997|6510|9056|10166|10991|81539	RGS2|SLC1A5|SLC7A7|SLC25A15|SLC38A3|SLC38A1	-2.2	Input ID
GO-BP	19	GO:0051194	positive regulation of cofactor metabolic process	-3.7	9.3	6.1	24156	35	370	5	1.4	0.6	3091|5209|5210|51085|171425	HIF1A|PFKFB3|PFKFB4|MLXIPL|CLYBL	-2.2	Input ID
GO-BP	19	GO:0009698	phenylpropanoid metabolic process	-3.7	24	8.3	24156	8	370	3	0.81	0.47	1548|1549|5446	CYP2A6|CYP2A7|PON3	-2.2	Input ID
GO-BP	19	GO:0009804	coumarin metabolic process	-3.7	24	8.3	24156	8	370	3	0.81	0.47	1548|1549|5446	CYP2A6|CYP2A7|PON3	-2.2	Input ID
GO-BP	19	GO:0061043	regulation of vascular wound healing	-3.7	24	8.3	24156	8	370	3	0.81	0.47	5054|7128|7852	SERPINE1|TNFAIP3|CXCR4	-2.2	Input ID
GO-BP	19	GO:0019369	arachidonic acid metabolic process	-3.7	7.1	5.7	24156	55	370	6	1.6	0.66	1548|1549|1559|1579|4051|8529	CYP2A6|CYP2A7|CYP2C9|CYP4A11|CYP4F3|CYP4F2	-2.2	Input ID
GO-BP	19	GO:0070848	response to growth factor	-3.7	2.2	4.2	24156	736	370	25	6.8	1.3	335|383|847|960|1373|1601|1848|2353|3091|3273|3491|3725|4015|4851|7498|7538|8754|9314|9518|22943|25805|54541|57530|148738|164656	APOA1|ARG1|CAT|CD44|CPS1|DAB2|DUSP6|FOS|HIF1A|HRG|CCN1|JUN|LOX|NOTCH1|XDH|ZFP36|ADAM9|KLF4|GDF15|DKK1|BAMBI|DDIT4|CGN|HJV|TMPRSS6	-2.2	Input ID
GO-BP	19	GO:0042157	lipoprotein metabolic process	-3.7	4.5	5	24156	131	370	9	2.4	0.8	335|345|2822|3685|5538|10400|51201|55062|84649	APOA1|APOC3|GPLD1|ITGAV|PPT1|PEMT|ZDHHC2|WIPI1|DGAT2	-2.2	Input ID
GO-BP	19	GO:0055076	transition metal ion homeostasis	-3.7	4.5	5	24156	132	370	9	2.4	0.8	3091|3162|3263|5621|6279|6280|7036|148738|164656	HIF1A|HMOX1|HPX|PRNP|S100A8|S100A9|TFR2|HJV|TMPRSS6	-2.1	Input ID
GO-BP	19	GO:0051098	regulation of binding	-3.7	2.8	4.4	24156	370	370	16	4.3	1.1	302|1601|1649|3162|3673|3725|4015|4318|5329|5444|7114|9314|22919|22943|25805|115908	ANXA2|DAB2|DDIT3|HMOX1|ITGA2|JUN|LOX|MMP9|PLAUR|PON1|TMSB4X|KLF4|MAPRE1|DKK1|BAMBI|CTHRC1	-2.1	Input ID
GO-BP	19	GO:0071634	regulation of transforming growth factor beta production	-3.7	9.1	6	24156	36	370	5	1.4	0.6	3091|3685|5345|7305|100133941	HIF1A|ITGAV|SERPINF2|TYROBP|CD24	-2.1	Input ID
GO-BP	19	GO:0042304	regulation of fatty acid biosynthetic process	-3.7	7	5.6	24156	56	370	6	1.6	0.66	335|344|345|1581|9104|51085	APOA1|APOC2|APOC3|CYP7A1|RGN|MLXIPL	-2.1	Input ID
GO-BP	19	GO:0015748	organophosphate ester transport	-3.7	5	5.1	24156	105	370	8	2.2	0.76	335|344|345|2538|2705|4363|5244|5360	APOA1|APOC2|APOC3|G6PC|GJB1|ABCC1|ABCB4|PLTP	-2.1	Input ID
GO-BP	19	GO:1903825	organic acid transmembrane transport	-3.7	4.4	4.9	24156	133	370	9	2.4	0.8	5997|6510|6535|9056|10166|10991|10998|27347|81539	RGS2|SLC1A5|SLC6A8|SLC7A7|SLC25A15|SLC38A3|SLC27A5|STK39|SLC38A1	-2.1	Input ID
GO-BP	19	GO:1905039	carboxylic acid transmembrane transport	-3.7	4.4	4.9	24156	133	370	9	2.4	0.8	5997|6510|6535|9056|10166|10991|10998|27347|81539	RGS2|SLC1A5|SLC6A8|SLC7A7|SLC25A15|SLC38A3|SLC27A5|STK39|SLC38A1	-2.1	Input ID
GO-BP	19	GO:0031331	positive regulation of cellular catabolic process	-3.7	2.8	4.4	24156	372	370	16	4.3	1.1	335|344|665|1075|1601|2822|3091|3099|3162|5209|5210|7128|7538|8754|9104|51085	APOA1|APOC2|BNIP3L|CTSC|DAB2|GPLD1|HIF1A|HK2|HMOX1|PFKFB3|PFKFB4|TNFAIP3|ZFP36|ADAM9|RGN|MLXIPL	-2.1	Input ID
GO-BP	19	GO:0043269	regulation of ion transport	-3.6	2.2	4.1	24156	700	370	24	6.5	1.3	18|335|383|483|1192|1579|2539|3383|4318|5244|5270|5621|5997|6529|6781|7114|7852|8529|8564|9104|10991|27075|27347|65267	ABAT|APOA1|ARG1|ATP1B3|CLIC1|CYP4A11|G6PD|ICAM1|MMP9|ABCB4|SERPINE2|PRNP|RGS2|SLC6A1|STC1|TMSB4X|CXCR4|CYP4F2|KMO|RGN|SLC38A3|TSPAN13|STK39|WNK3	-2.1	Input ID
GO-BP	19	GO:0048678	response to axon injury	-3.6	5.7	5.3	24156	80	370	7	1.9	0.71	335|383|3725|3956|6696|7305|9314	APOA1|ARG1|JUN|LGALS1|SPP1|TYROBP|KLF4	-2.1	Input ID
GO-BP	19	GO:0030212	hyaluronan metabolic process	-3.6	8.8	5.9	24156	37	370	5	1.4	0.6	960|3697|3698|3699|23670	CD44|ITIH1|ITIH2|ITIH3|CEMIP2	-2.1	Input ID
GO-BP	19	GO:0007229	integrin-mediated signaling pathway	-3.6	4.9	5	24156	107	370	8	2.2	0.76	335|1601|2207|3673|3685|4739|7305|8754	APOA1|DAB2|FCER1G|ITGA2|ITGAV|NEDD9|TYROBP|ADAM9	-2.1	Input ID
GO-BP	19	GO:0042063	gliogenesis	-3.6	3	4.4	24156	301	370	14	3.8	0.99	728|1880|2119|3912|4851|5270|6279|6659|7097|7852|10397|25825|27242|28999	C5AR1|GPR183|ETV5|LAMB1|NOTCH1|SERPINE2|S100A8|SOX4|TLR2|CXCR4|NDRG1|BACE2|TNFRSF21|KLF15	-2.1	Input ID
GO-BP	19	GO:0071363	cellular response to growth factor stimulus	-3.6	2.2	4.1	24156	706	370	24	6.5	1.3	335|383|847|960|1373|1601|2353|3091|3273|3491|3725|4015|4851|7498|7538|8754|9314|9518|22943|25805|54541|57530|148738|164656	APOA1|ARG1|CAT|CD44|CPS1|DAB2|FOS|HIF1A|HRG|CCN1|JUN|LOX|NOTCH1|XDH|ZFP36|ADAM9|KLF4|GDF15|DKK1|BAMBI|DDIT4|CGN|HJV|TMPRSS6	-2	Input ID
GO-BP	19	GO:0046716	muscle cell cellular homeostasis	-3.6	12	6.5	24156	21	370	4	1.1	0.54	226|3091|4015|5340	ALDOA|HIF1A|LOX|PLG	-2	Input ID
GO-BP	19	GO:0042135	neurotransmitter catabolic process	-3.6	12	6.5	24156	21	370	4	1.1	0.54	18|635|7915|29958	ABAT|BHMT|ALDH5A1|DMGDH	-2	Input ID
GO-BP	19	GO:0042402	cellular biogenic amine catabolic process	-3.6	12	6.5	24156	21	370	4	1.1	0.54	635|8564|23498|29958	BHMT|KMO|HAAO|DMGDH	-2	Input ID
GO-BP	19	GO:0071604	transforming growth factor beta production	-3.6	8.6	5.8	24156	38	370	5	1.4	0.6	3091|3685|5345|7305|100133941	HIF1A|ITGAV|SERPINF2|TYROBP|CD24	-2	Input ID
GO-BP	19	GO:0006979	response to oxidative stress	-3.6	2.6	4.2	24156	458	370	18	4.9	1.1	383|847|2119|2353|2539|3091|3162|3725|3939|4318|5621|6898|7128|8309|8754|9104|9314|30001	ARG1|CAT|ETV5|FOS|G6PD|HIF1A|HMOX1|JUN|LDHA|MMP9|PRNP|TAT|TNFAIP3|ACOX2|ADAM9|RGN|KLF4|ERO1A	-2	Input ID
GO-BP	19	GO:0051541	elastin metabolic process	-3.6	22	7.8	24156	9	370	3	0.81	0.47	1839|3091|4321	HBEGF|HIF1A|MMP12	-2	Input ID
GO-BP	19	GO:0019626	short-chain fatty acid catabolic process	-3.6	22	7.8	24156	9	370	3	0.81	0.47	4594|5106|5264	MMUT|PCK2|PHYH	-2	Input ID
GO-BP	19	GO:0046951	ketone body biosynthetic process	-3.6	22	7.8	24156	9	370	3	0.81	0.47	622|3158|10998	BDH1|HMGCS2|SLC27A5	-2	Input ID
GO-BP	19	GO:0034371	chylomicron remodeling	-3.6	22	7.8	24156	9	370	3	0.81	0.47	335|344|345	APOA1|APOC2|APOC3	-2	Input ID
GO-BP	19	GO:0071385	cellular response to glucocorticoid stimulus	-3.5	6.6	5.4	24156	59	370	6	1.6	0.66	383|3383|5106|6781|7538|54541	ARG1|ICAM1|PCK2|STC1|ZFP36|DDIT4	-2	Input ID
GO-BP	19	GO:0097755	positive regulation of blood vessel diameter	-3.5	6.6	5.4	24156	59	370	6	1.6	0.66	133|1373|3162|3827|5997|59342	ADM|CPS1|HMOX1|KNG1|RGS2|SCPEP1	-2	Input ID
GO-BP	19	GO:0061900	glial cell activation	-3.5	6.6	5.4	24156	59	370	6	1.6	0.66	728|1075|3725|7097|7305|25825	C5AR1|CTSC|JUN|TLR2|TYROBP|BACE2	-2	Input ID
GO-BP	19	GO:0090087	regulation of peptide transport	-3.5	2.2	4	24156	755	370	25	6.8	1.3	18|283|335|665|1992|2822|3091|4321|5066|5552|5621|5950|6279|6513|6514|6659|7036|7097|7114|7128|8754|9520|27242|55107|84868	ABAT|ANG|APOA1|BNIP3L|SERPINB1|GPLD1|HIF1A|MMP12|PAM|SRGN|PRNP|RBP4|S100A8|SLC2A1|SLC2A2|SOX4|TFR2|TLR2|TMSB4X|TNFAIP3|ADAM9|NPEPPS|TNFRSF21|ANO1|HAVCR2	-2	Input ID
GO-BP	19	GO:0045913	positive regulation of carbohydrate metabolic process	-3.5	5.4	5.1	24156	84	370	7	1.9	0.71	2822|3091|5209|5210|9104|51085|84649	GPLD1|HIF1A|PFKFB3|PFKFB4|RGN|MLXIPL|DGAT2	-2	Input ID
GO-BP	19	GO:0045824	negative regulation of innate immune response	-3.5	6.5	5.3	24156	60	370	6	1.6	0.66	383|4321|5272|7128|11326|84868	ARG1|MMP12|SERPINB9|TNFAIP3|VSIG4|HAVCR2	-2	Input ID
GO-BP	19	GO:0032891	negative regulation of organic acid transport	-3.5	12	6.4	24156	22	370	4	1.1	0.54	18|5997|8529|27347	ABAT|RGS2|CYP4F2|STK39	-2	Input ID
GO-BP	19	GO:0031400	negative regulation of protein modification process	-3.5	2.3	4.1	24156	631	370	22	5.9	1.2	467|1847|1848|2041|2539|3486|3725|5502|5621|5997|6659|7128|7498|9104|9314|22943|23603|23645|28999|51085|54541|55022	ATF3|DUSP5|DUSP6|EPHA1|G6PD|IGFBP3|JUN|PPP1R1A|PRNP|RGS2|SOX4|TNFAIP3|XDH|RGN|KLF4|DKK1|CORO1C|PPP1R15A|KLF15|MLXIPL|DDIT4|PID1	-2	Input ID
GO-BP	19	GO:0032642	regulation of chemokine production	-3.5	5.4	5	24156	85	370	7	1.9	0.71	3091|3162|3570|6372|7097|9314|84868	HIF1A|HMOX1|IL6R|CXCL6|TLR2|KLF4|HAVCR2	-1.9	Input ID
GO-BP	19	GO:0042130	negative regulation of T cell proliferation	-3.5	6.4	5.3	24156	61	370	6	1.6	0.66	383|5621|10457|11326|27242|84868	ARG1|PRNP|GPNMB|VSIG4|TNFRSF21|HAVCR2	-1.9	Input ID
GO-BP	19	GO:0007015	actin filament organization	-3.5	2.6	4.2	24156	426	370	17	4.6	1.1	226|283|335|390|2041|3383|4082|4739|5217|5345|7114|8470|9168|23433|23603|83715|84952	ALDOA|ANG|APOA1|RND3|EPHA1|ICAM1|MARCKS|NEDD9|PFN2|SERPINF2|TMSB4X|SORBS2|TMSB10|RHOQ|CORO1C|ESPN|CGNL1	-1.9	Input ID
GO-BP	19	GO:0030879	mammary gland development	-3.5	4.1	4.7	24156	142	370	9	2.4	0.8	383|462|2119|2806|3091|3099|3673|5066|7498	ARG1|SERPINC1|ETV5|GOT2|HIF1A|HK2|ITGA2|PAM|XDH	-1.9	Input ID
GO-BP	19	GO:0045766	positive regulation of angiogenesis	-3.4	3.5	4.5	24156	206	370	11	3	0.88	133|728|729|2041|3091|3099|3162|5054|5315|7852|9314	ADM|C5AR1|C6|EPHA1|HIF1A|HK2|HMOX1|SERPINE1|PKM|CXCR4|KLF4	-1.9	Input ID
GO-BP	19	GO:0071384	cellular response to corticosteroid stimulus	-3.4	6.3	5.2	24156	62	370	6	1.6	0.66	383|3383|5106|6781|7538|54541	ARG1|ICAM1|PCK2|STC1|ZFP36|DDIT4	-1.9	Input ID
GO-BP	19	GO:0045723	positive regulation of fatty acid biosynthetic process	-3.4	11	6.2	24156	23	370	4	1.1	0.54	335|344|9104|51085	APOA1|APOC2|RGN|MLXIPL	-1.9	Input ID
GO-BP	19	GO:0009310	amine catabolic process	-3.4	11	6.2	24156	23	370	4	1.1	0.54	635|8564|23498|29958	BHMT|KMO|HAAO|DMGDH	-1.9	Input ID
GO-BP	19	GO:0070542	response to fatty acid	-3.4	5.3	5	24156	87	370	7	1.9	0.71	847|1373|5444|6319|7097|55022|84649	CAT|CPS1|PON1|SCD|TLR2|PID1|DGAT2	-1.9	Input ID
GO-BP	19	GO:0098542	defense response to other organism	-3.4	2.3	4	24156	596	370	21	5.7	1.2	383|665|728|2207|3273|3570|4069|4321|5054|6035|6279|6280|6364|6372|7097|7128|54541|81035|84868|114770|653808	ARG1|BNIP3L|C5AR1|FCER1G|HRG|IL6R|LYZ|MMP12|SERPINE1|RNASE1|S100A8|S100A9|CCL20|CXCL6|TLR2|TNFAIP3|DDIT4|COLEC12|HAVCR2|PGLYRP2|ZG16	-1.9	Input ID
GO-BP	19	GO:0002573	myeloid leukocyte differentiation	-3.4	3.5	4.4	24156	208	370	11	3	0.88	302|714|1880|2207|2353|3725|4318|7097|7107|7305|28962	ANXA2|C1QC|GPR183|FCER1G|FOS|JUN|MMP9|TLR2|GPR137B|TYROBP|OSTM1	-1.9	Input ID
GO-BP	19	GO:0071548	response to dexamethasone	-3.4	8	5.6	24156	41	370	5	1.4	0.6	383|1373|3383|5106|54541	ARG1|CPS1|ICAM1|PCK2|DDIT4	-1.9	Input ID
GO-BP	19	GO:0051180	vitamin transport	-3.4	8	5.6	24156	41	370	5	1.4	0.6	173|335|4363|6513|6514	AFM|APOA1|ABCC1|SLC2A1|SLC2A2	-1.9	Input ID
GO-BP	19	GO:0019432	triglyceride biosynthetic process	-3.4	8	5.6	24156	41	370	5	1.4	0.6	2822|5106|9104|80168|84649	GPLD1|PCK2|RGN|MOGAT2|DGAT2	-1.9	Input ID
GO-BP	19	GO:0035337	fatty-acyl-CoA metabolic process	-3.4	8	5.6	24156	41	370	5	1.4	0.6	5538|6319|7923|84649|123876	PPT1|SCD|HSD17B8|DGAT2|ACSM2A	-1.9	Input ID
GO-BP	19	GO:0045936	negative regulation of phosphate metabolic process	-3.4	2.3	4	24156	597	370	21	5.7	1.2	467|1847|1848|2041|2203|3486|3725|5502|5621|5997|7128|7498|9104|9314|22943|23603|23645|51085|54541|55022|79888	ATF3|DUSP5|DUSP6|EPHA1|FBP1|IGFBP3|JUN|PPP1R1A|PRNP|RGS2|TNFAIP3|XDH|RGN|KLF4|DKK1|CORO1C|PPP1R15A|MLXIPL|DDIT4|PID1|LPCAT1	-1.9	Input ID
GO-BP	19	GO:0034378	chylomicron assembly	-3.4	20	7.3	24156	10	370	3	0.81	0.47	335|344|345	APOA1|APOC2|APOC3	-1.9	Input ID
GO-BP	19	GO:0042758	long-chain fatty acid catabolic process	-3.4	20	7.3	24156	10	370	3	0.81	0.47	1579|4051|8529	CYP4A11|CYP4F3|CYP4F2	-1.9	Input ID
GO-BP	19	GO:0006570	tyrosine metabolic process	-3.4	20	7.3	24156	10	370	3	0.81	0.47	3081|3242|6898	HGD|HPD|TAT	-1.9	Input ID
GO-BP	19	GO:0070942	neutrophil mediated cytotoxicity	-3.4	20	7.3	24156	10	370	3	0.81	0.47	383|1776|6372	ARG1|DNASE1L3|CXCL6	-1.9	Input ID
GO-BP	19	GO:0097267	omega-hydroxylase P450 pathway	-3.4	20	7.3	24156	10	370	3	0.81	0.47	1559|1579|8529	CYP2C9|CYP4A11|CYP4F2	-1.9	Input ID
GO-BP	19	GO:0010563	negative regulation of phosphorus metabolic process	-3.4	2.3	4	24156	598	370	21	5.7	1.2	467|1847|1848|2041|2203|3486|3725|5502|5621|5997|7128|7498|9104|9314|22943|23603|23645|51085|54541|55022|79888	ATF3|DUSP5|DUSP6|EPHA1|FBP1|IGFBP3|JUN|PPP1R1A|PRNP|RGS2|TNFAIP3|XDH|RGN|KLF4|DKK1|CORO1C|PPP1R15A|MLXIPL|DDIT4|PID1|LPCAT1	-1.9	Input ID
GO-BP	19	GO:0006879	cellular iron ion homeostasis	-3.4	6.2	5.2	24156	63	370	6	1.6	0.66	3091|3162|3263|7036|148738|164656	HIF1A|HMOX1|HPX|TFR2|HJV|TMPRSS6	-1.9	Input ID
GO-BP	19	GO:0070098	chemokine-mediated signaling pathway	-3.4	5.2	4.9	24156	88	370	7	1.9	0.71	3091|6364|6370|6372|6374|7852|27347	HIF1A|CCL20|CCL25|CXCL6|CXCL5|CXCR4|STK39	-1.9	Input ID
GO-BP	19	GO:0097164	ammonium ion metabolic process	-3.4	3.4	4.4	24156	211	370	11	3	0.88	18|335|427|635|1610|2822|5444|10400|29958|79887|79888	ABAT|APOA1|ASAH1|BHMT|DAO|GPLD1|PON1|PEMT|DMGDH|PLBD1|LPCAT1	-1.9	Input ID
GO-BP	19	GO:0034383	low-density lipoprotein particle clearance	-3.4	7.8	5.5	24156	42	370	5	1.4	0.6	302|345|3162|29116|84649	ANXA2|APOC3|HMOX1|MYLIP|DGAT2	-1.9	Input ID
GO-BP	19	GO:0046461	neutral lipid catabolic process	-3.4	7.8	5.5	24156	42	370	5	1.4	0.6	335|344|345|1373|2822	APOA1|APOC2|APOC3|CPS1|GPLD1	-1.9	Input ID
GO-BP	19	GO:0046464	acylglycerol catabolic process	-3.4	7.8	5.5	24156	42	370	5	1.4	0.6	335|344|345|1373|2822	APOA1|APOC2|APOC3|CPS1|GPLD1	-1.9	Input ID
GO-BP	19	GO:0032623	interleukin-2 production	-3.4	6.1	5.1	24156	64	370	6	1.6	0.66	2207|5621|7128|7538|11326|84868	FCER1G|PRNP|TNFAIP3|ZFP36|VSIG4|HAVCR2	-1.9	Input ID
GO-BP	19	GO:0001933	negative regulation of protein phosphorylation	-3.4	2.5	4.1	24156	436	370	17	4.6	1.1	467|1847|1848|2041|3486|3725|5621|5997|7128|7498|9104|9314|22943|23603|51085|54541|55022	ATF3|DUSP5|DUSP6|EPHA1|IGFBP3|JUN|PRNP|RGS2|TNFAIP3|XDH|RGN|KLF4|DKK1|CORO1C|MLXIPL|DDIT4|PID1	-1.8	Input ID
GO-BP	19	GO:2000257	regulation of protein activation cascade	-3.3	4.5	4.7	24156	117	370	8	2.2	0.76	462|714|728|729|732|1361|10877|11326	SERPINC1|C1QC|C5AR1|C6|C8B|CPB2|CFHR4|VSIG4	-1.8	Input ID
GO-BP	19	GO:1990266	neutrophil migration	-3.3	4.5	4.7	24156	117	370	8	2.2	0.76	728|2207|6279|6280|6364|6370|6372|6374	C5AR1|FCER1G|S100A8|S100A9|CCL20|CCL25|CXCL6|CXCL5	-1.8	Input ID
GO-BP	19	GO:0042326	negative regulation of phosphorylation	-3.3	2.5	4	24156	477	370	18	4.9	1.1	467|1847|1848|2041|2203|3486|3725|5621|5997|7128|7498|9104|9314|22943|23603|51085|54541|55022	ATF3|DUSP5|DUSP6|EPHA1|FBP1|IGFBP3|JUN|PRNP|RGS2|TNFAIP3|XDH|RGN|KLF4|DKK1|CORO1C|MLXIPL|DDIT4|PID1	-1.8	Input ID
GO-BP	19	GO:0014850	response to muscle activity	-3.3	11	6	24156	24	370	4	1.1	0.54	2806|3091|3673|252995	GOT2|HIF1A|ITGA2|FNDC5	-1.8	Input ID
GO-BP	19	GO:0042537	benzene-containing compound metabolic process	-3.3	11	6	24156	24	370	4	1.1	0.54	2806|5446|8564|23498	GOT2|PON3|KMO|HAAO	-1.8	Input ID
GO-BP	19	GO:0045821	positive regulation of glycolytic process	-3.3	11	6	24156	24	370	4	1.1	0.54	3091|5209|5210|51085	HIF1A|PFKFB3|PFKFB4|MLXIPL	-1.8	Input ID
GO-BP	19	GO:0046835	carbohydrate phosphorylation	-3.3	11	6	24156	24	370	4	1.1	0.54	3099|3795|5209|5210	HK2|KHK|PFKFB3|PFKFB4	-1.8	Input ID
GO-BP	19	GO:0042738	exogenous drug catabolic process	-3.3	11	6	24156	24	370	4	1.1	0.54	1548|1549|1559|8856	CYP2A6|CYP2A7|CYP2C9|NR1I2	-1.8	Input ID
GO-BP	19	GO:0051048	negative regulation of secretion	-3.3	3.2	4.3	24156	247	370	12	3.2	0.92	18|335|1992|3162|4851|5552|7114|7128|8529|27242|27347|65267	ABAT|APOA1|SERPINB1|HMOX1|NOTCH1|SRGN|TMSB4X|TNFAIP3|CYP4F2|TNFRSF21|STK39|WNK3	-1.8	Input ID
GO-BP	19	GO:0002695	negative regulation of leukocyte activation	-3.3	3.6	4.4	24156	179	370	10	2.7	0.84	383|3162|5621|7128|7305|10457|11326|27242|84868|114770	ARG1|HMOX1|PRNP|TNFAIP3|TYROBP|GPNMB|VSIG4|TNFRSF21|HAVCR2|PGLYRP2	-1.8	Input ID
GO-BP	19	GO:0030036	actin cytoskeleton organization	-3.3	2.2	3.9	24156	692	370	23	6.2	1.3	226|283|335|390|2041|3273|3383|4082|4739|5066|5217|5345|7114|7305|8470|9168|23433|23603|54443|83715|84952|114793|283431	ALDOA|ANG|APOA1|RND3|EPHA1|HRG|ICAM1|MARCKS|NEDD9|PAM|PFN2|SERPINF2|TMSB4X|TYROBP|SORBS2|TMSB10|RHOQ|CORO1C|ANLN|ESPN|CGNL1|FMNL2|GAS2L3	-1.8	Input ID
GO-BP	19	GO:0034308	primary alcohol metabolic process	-3.3	5.1	4.8	24156	90	370	7	1.9	0.71	124|1551|1577|5950|7276|8608|84649	ADH1A|CYP3A7|CYP3A5|RBP4|TTR|RDH16|DGAT2	-1.8	Input ID
GO-BP	19	GO:0009112	nucleobase metabolic process	-3.3	7.6	5.4	24156	43	370	5	1.4	0.6	1373|1807|1808|7276|7498	CPS1|DPYS|DPYSL2|TTR|XDH	-1.8	Input ID
GO-BP	19	GO:0033273	response to vitamin	-3.3	5	4.8	24156	91	370	7	1.9	0.71	383|847|2155|3673|6696|6781|10400	ARG1|CAT|F7|ITGA2|SPP1|STC1|PEMT	-1.8	Input ID
GO-BP	19	GO:0048771	tissue remodeling	-3.3	3.6	4.4	24156	181	370	10	2.7	0.84	383|3091|3273|5340|6694|6696|7107|7128|10457|115908	ARG1|HIF1A|HRG|PLG|SPP2|SPP1|GPR137B|TNFAIP3|GPNMB|CTHRC1	-1.8	Input ID
GO-BP	19	GO:0071621	granulocyte chemotaxis	-3.3	4.4	4.6	24156	119	370	8	2.2	0.76	728|2207|6279|6280|6364|6370|6372|6374	C5AR1|FCER1G|S100A8|S100A9|CCL20|CCL25|CXCL6|CXCL5	-1.8	Input ID
GO-BP	19	GO:0043618	regulation of transcription from RNA polymerase II promoter in response to stress	-3.3	4.4	4.6	24156	119	370	8	2.2	0.76	467|768|1649|3091|3162|3725|4851|112399	ATF3|CA9|DDIT3|HIF1A|HMOX1|JUN|NOTCH1|EGLN3	-1.8	Input ID
GO-BP	19	GO:0030855	epithelial cell differentiation	-3.3	2.1	3.8	24156	786	370	25	6.8	1.3	427|1373|1601|2355|3091|3383|3673|3725|4318|4851|5054|5106|5230|5624|6659|6781|7263|7498|7538|7852|8754|9314|23764|28999|100133941	ASAH1|CPS1|DAB2|FOSL2|HIF1A|ICAM1|ITGA2|JUN|MMP9|NOTCH1|SERPINE1|PCK2|PGK1|PROC|SOX4|STC1|TST|XDH|ZFP36|CXCR4|ADAM9|KLF4|MAFF|KLF15|CD24	-1.8	Input ID
GO-BP	19	GO:0009914	hormone transport	-3.3	2.8	4.1	24156	324	370	14	3.8	0.99	18|133|2822|3091|5950|6513|6514|6567|6580|6659|6696|7036|7276|55107	ABAT|ADM|GPLD1|HIF1A|RBP4|SLC2A1|SLC2A2|SLC16A2|SLC22A1|SOX4|SPP1|TFR2|TTR|ANO1	-1.8	Input ID
GO-BP	19	GO:0051250	negative regulation of lymphocyte activation	-3.3	3.9	4.5	24156	150	370	9	2.4	0.8	383|5621|7128|7305|10457|11326|27242|84868|114770	ARG1|PRNP|TNFAIP3|TYROBP|GPNMB|VSIG4|TNFRSF21|HAVCR2|PGLYRP2	-1.8	Input ID
GO-BP	19	GO:0006559	L-phenylalanine catabolic process	-3.3	18	7	24156	11	370	3	0.81	0.47	3081|3242|6898	HGD|HPD|TAT	-1.8	Input ID
GO-BP	19	GO:1902221	erythrose 4-phosphate/phosphoenolpyruvate family amino acid metabolic process	-3.3	18	7	24156	11	370	3	0.81	0.47	3081|3242|6898	HGD|HPD|TAT	-1.8	Input ID
GO-BP	19	GO:0019852	L-ascorbic acid metabolic process	-3.3	18	7	24156	11	370	3	0.81	0.47	6513|6515|9104	SLC2A1|SLC2A3|RGN	-1.8	Input ID
GO-BP	19	GO:0046113	nucleobase catabolic process	-3.3	18	7	24156	11	370	3	0.81	0.47	1807|1808|7498	DPYS|DPYSL2|XDH	-1.8	Input ID
GO-BP	19	GO:0006558	L-phenylalanine metabolic process	-3.3	18	7	24156	11	370	3	0.81	0.47	3081|3242|6898	HGD|HPD|TAT	-1.8	Input ID
GO-BP	19	GO:1902222	erythrose 4-phosphate/phosphoenolpyruvate family amino acid catabolic process	-3.3	18	7	24156	11	370	3	0.81	0.47	3081|3242|6898	HGD|HPD|TAT	-1.8	Input ID
GO-BP	19	GO:0046950	cellular ketone body metabolic process	-3.3	18	7	24156	11	370	3	0.81	0.47	622|3158|10998	BDH1|HMGCS2|SLC27A5	-1.8	Input ID
GO-BP	19	GO:0034372	very-low-density lipoprotein particle remodeling	-3.3	18	7	24156	11	370	3	0.81	0.47	335|344|345	APOA1|APOC2|APOC3	-1.8	Input ID
GO-BP	19	GO:0000050	urea cycle	-3.3	18	7	24156	11	370	3	0.81	0.47	383|1373|10166	ARG1|CPS1|SLC25A15	-1.8	Input ID
GO-BP	19	GO:0006898	receptor-mediated endocytosis	-3.2	2.8	4.1	24156	327	370	14	3.8	0.99	133|302|335|344|345|1601|2207|3263|5054|5538|7036|11031|22943|81035	ADM|ANXA2|APOA1|APOC2|APOC3|DAB2|FCER1G|HPX|SERPINE1|PPT1|TFR2|RAB31|DKK1|COLEC12	-1.8	Input ID
GO-BP	19	GO:0010565	regulation of cellular ketone metabolic process	-3.2	3.5	4.3	24156	184	370	10	2.7	0.84	133|335|344|345|635|1581|9056|9104|51085|84649	ADM|APOA1|APOC2|APOC3|BHMT|CYP7A1|SLC7A7|RGN|MLXIPL|DGAT2	-1.8	Input ID
GO-BP	19	GO:0051952	regulation of amine transport	-3.2	4.9	4.7	24156	93	370	7	1.9	0.71	18|383|5997|6529|8564|10991|27347	ABAT|ARG1|RGS2|SLC6A1|KMO|SLC38A3|STK39	-1.8	Input ID
GO-BP	19	GO:1903532	positive regulation of secretion by cell	-3.2	2.6	4	24156	406	370	16	4.3	1.1	18|283|1361|2207|2822|3091|4321|5950|6659|6696|7036|7097|8564|8754|55107|84868	ABAT|ANG|CPB2|FCER1G|GPLD1|HIF1A|MMP12|RBP4|SOX4|SPP1|TFR2|TLR2|KMO|ADAM9|ANO1|HAVCR2	-1.8	Input ID
GO-BP	19	GO:0070374	positive regulation of ERK1 and ERK2 cascade	-3.2	3.3	4.2	24156	219	370	11	3	0.88	728|960|1880|3383|3725|4851|5345|6364|6370|10457|84868	C5AR1|CD44|GPR183|ICAM1|JUN|NOTCH1|SERPINF2|CCL20|CCL25|GPNMB|HAVCR2	-1.7	Input ID
GO-BP	19	GO:0010812	negative regulation of cell-substrate adhesion	-3.2	5.8	4.9	24156	68	370	6	1.6	0.66	3956|4321|4851|5054|5340|23603	LGALS1|MMP12|NOTCH1|SERPINE1|PLG|CORO1C	-1.7	Input ID
GO-BP	19	GO:0001503	ossification	-3.2	2.6	4	24156	408	370	16	4.3	1.1	847|1192|1462|2822|3091|3486|3491|3570|4015|4851|5552|6696|6781|10457|22943|115908	CAT|CLIC1|VCAN|GPLD1|HIF1A|IGFBP3|CCN1|IL6R|LOX|NOTCH1|SRGN|SPP1|STC1|GPNMB|DKK1|CTHRC1	-1.7	Input ID
GO-BP	19	GO:2001233	regulation of apoptotic signaling pathway	-3.2	2.6	4	24156	408	370	16	4.3	1.1	467|960|1075|1649|1687|2023|3091|3162|3383|3685|4318|5054|5329|6279|6280|7128	ATF3|CD44|CTSC|DDIT3|GSDME|ENO1|HIF1A|HMOX1|ICAM1|ITGAV|MMP9|SERPINE1|PLAUR|S100A8|S100A9|TNFAIP3	-1.7	Input ID
GO-BP	19	GO:0050920	regulation of chemotaxis	-3.2	3.3	4.2	24156	220	370	11	3	0.88	728|1880|2155|3273|3570|3673|4851|5054|7114|7852|27347	C5AR1|GPR183|F7|HRG|IL6R|ITGA2|NOTCH1|SERPINE1|TMSB4X|CXCR4|STK39	-1.7	Input ID
GO-BP	19	GO:0051197	positive regulation of coenzyme metabolic process	-3.2	10	5.8	24156	26	370	4	1.1	0.54	3091|5209|5210|51085	HIF1A|PFKFB3|PFKFB4|MLXIPL	-1.7	Input ID
GO-BP	19	GO:0030813	positive regulation of nucleotide catabolic process	-3.2	10	5.8	24156	26	370	4	1.1	0.54	3091|5209|5210|51085	HIF1A|PFKFB3|PFKFB4|MLXIPL	-1.7	Input ID
GO-BP	19	GO:0051156	glucose 6-phosphate metabolic process	-3.2	10	5.8	24156	26	370	4	1.1	0.54	2538|2539|3099|7086	G6PC|G6PD|HK2|TKT	-1.7	Input ID
GO-BP	19	GO:0051101	regulation of DNA binding	-3.2	4.2	4.5	24156	123	370	8	2.2	0.76	1649|3162|3673|3725|4318|5329|7114|9314	DDIT3|HMOX1|ITGA2|JUN|MMP9|PLAUR|TMSB4X|KLF4	-1.7	Input ID
GO-BP	19	GO:0045807	positive regulation of endocytosis	-3.2	3.8	4.4	24156	154	370	9	2.4	0.8	302|335|1601|2207|3673|5054|5538|7036|11031	ANXA2|APOA1|DAB2|FCER1G|ITGA2|SERPINE1|PPT1|TFR2|RAB31	-1.7	Input ID
GO-BP	19	GO:0098656	anion transmembrane transport	-3.2	2.9	4.1	24156	294	370	13	3.5	0.96	1192|4363|5621|5997|6510|6535|9056|10166|10991|10998|27347|55107|81539	CLIC1|ABCC1|PRNP|RGS2|SLC1A5|SLC6A8|SLC7A7|SLC25A15|SLC38A3|SLC27A5|STK39|ANO1|SLC38A1	-1.7	Input ID
GO-BP	19	GO:0014823	response to activity	-3.2	5.7	4.9	24156	69	370	6	1.6	0.66	847|2806|3091|3673|7852|252995	CAT|GOT2|HIF1A|ITGA2|CXCR4|FNDC5	-1.7	Input ID
GO-BP	19	GO:0060759	regulation of response to cytokine stimulus	-3.2	3.5	4.2	24156	188	370	10	2.7	0.84	335|383|3091|3263|4321|7097|7128|7852|9314|100133941	APOA1|ARG1|HIF1A|HPX|MMP12|TLR2|TNFAIP3|CXCR4|KLF4|CD24	-1.7	Input ID
GO-BP	19	GO:0002793	positive regulation of peptide secretion	-3.2	2.9	4	24156	295	370	13	3.5	0.96	18|283|2822|3091|4321|5950|6279|6659|7036|7097|8754|55107|84868	ABAT|ANG|GPLD1|HIF1A|MMP12|RBP4|S100A8|SOX4|TFR2|TLR2|ADAM9|ANO1|HAVCR2	-1.7	Input ID
GO-BP	19	GO:0043900	regulation of multi-organism process	-3.2	2.5	3.9	24156	412	370	16	4.3	1.1	302|383|3685|3725|3956|4321|4851|6372|7128|7538|7852|10184|23643|51156|84868|653808	ANXA2|ARG1|ITGAV|JUN|LGALS1|MMP12|NOTCH1|CXCL6|TNFAIP3|ZFP36|CXCR4|LHFPL2|LY96|SERPINA10|HAVCR2|ZG16	-1.7	Input ID
GO-BP	19	GO:0032870	cellular response to hormone stimulus	-3.2	2.1	3.7	24156	712	370	23	6.2	1.3	383|1373|1601|2353|2538|2822|3383|3673|3725|4851|5106|5313|5315|6696|6781|7538|8856|9518|9970|11031|23433|54541|55022	ARG1|CPS1|DAB2|FOS|G6PC|GPLD1|ICAM1|ITGA2|JUN|NOTCH1|PCK2|PKLR|PKM|SPP1|STC1|ZFP36|NR1I2|GDF15|NR1I3|RAB31|RHOQ|DDIT4|PID1	-1.7	Input ID
GO-BP	19	GO:0050777	negative regulation of immune response	-3.2	3.8	4.3	24156	156	370	9	2.4	0.8	335|383|3162|4321|5272|7128|11326|84868|114770	APOA1|ARG1|HMOX1|MMP12|SERPINB9|TNFAIP3|VSIG4|HAVCR2|PGLYRP2	-1.7	Input ID
GO-BP	19	GO:1902224	ketone body metabolic process	-3.2	16	6.6	24156	12	370	3	0.81	0.47	622|3158|10998	BDH1|HMGCS2|SLC27A5	-1.7	Input ID
GO-BP	19	GO:0033700	phospholipid efflux	-3.2	16	6.6	24156	12	370	3	0.81	0.47	335|344|345	APOA1|APOC2|APOC3	-1.7	Input ID
GO-BP	19	GO:0006707	cholesterol catabolic process	-3.2	16	6.6	24156	12	370	3	0.81	0.47	1581|1593|6718	CYP7A1|CYP27A1|AKR1D1	-1.7	Input ID
GO-BP	19	GO:0016127	sterol catabolic process	-3.2	16	6.6	24156	12	370	3	0.81	0.47	1581|1593|6718	CYP7A1|CYP27A1|AKR1D1	-1.7	Input ID
GO-BP	19	GO:0033690	positive regulation of osteoblast proliferation	-3.2	16	6.6	24156	12	370	3	0.81	0.47	3491|3685|115908	CCN1|ITGAV|CTHRC1	-1.7	Input ID
GO-BP	19	GO:0051549	positive regulation of keratinocyte migration	-3.2	16	6.6	24156	12	370	3	0.81	0.47	1839|4318|8754	HBEGF|MMP9|ADAM9	-1.7	Input ID
GO-BP	19	GO:0050673	epithelial cell proliferation	-3.1	2.4	3.9	24156	455	370	17	4.6	1.1	283|335|383|728|1361|1992|3091|3162|3486|3725|3912|4321|4851|7128|7498|7538|9104	ANG|APOA1|ARG1|C5AR1|CPB2|SERPINB1|HIF1A|HMOX1|IGFBP3|JUN|LAMB1|MMP12|NOTCH1|TNFAIP3|XDH|ZFP36|RGN	-1.7	Input ID
GO-BP	19	GO:0006706	steroid catabolic process	-3.1	9.7	5.6	24156	27	370	4	1.1	0.54	1581|1593|6696|6718	CYP7A1|CYP27A1|SPP1|AKR1D1	-1.7	Input ID
GO-BP	19	GO:0019217	regulation of fatty acid metabolic process	-3.1	4.7	4.6	24156	97	370	7	1.9	0.71	335|344|345|1581|9104|51085|84649	APOA1|APOC2|APOC3|CYP7A1|RGN|MLXIPL|DGAT2	-1.7	Input ID
GO-BP	19	GO:0014075	response to amine	-3.1	6.9	5.1	24156	47	370	5	1.4	0.6	383|1373|3383|3673|5997	ARG1|CPS1|ICAM1|ITGA2|RGS2	-1.7	Input ID
GO-BP	19	GO:0030574	collagen catabolic process	-3.1	6.9	5.1	24156	47	370	5	1.4	0.6	4312|4316|4318|4321|164656	MMP1|MMP7|MMP9|MMP12|TMPRSS6	-1.7	Input ID
GO-BP	19	GO:0010001	glial cell differentiation	-3.1	3.2	4.1	24156	225	370	11	3	0.88	728|4851|5270|6279|6659|7097|7852|10397|25825|27242|28999	C5AR1|NOTCH1|SERPINE2|S100A8|SOX4|TLR2|CXCR4|NDRG1|BACE2|TNFRSF21|KLF15	-1.7	Input ID
GO-BP	19	GO:0045785	positive regulation of cell adhesion	-3.1	2.5	3.9	24156	416	370	16	4.3	1.1	335|960|2041|3273|3383|3491|3673|3685|3956|4739|5329|5345|6370|8754|84868|100133941	APOA1|CD44|EPHA1|HRG|ICAM1|CCN1|ITGA2|ITGAV|LGALS1|NEDD9|PLAUR|SERPINF2|CCL25|ADAM9|HAVCR2|CD24	-1.7	Input ID
GO-BP	19	GO:0010517	regulation of phospholipase activity	-3.1	5.5	4.8	24156	71	370	6	1.6	0.66	283|344|728|3491|5538|5997	ANG|APOC2|C5AR1|CCN1|PPT1|RGS2	-1.7	Input ID
GO-BP	19	GO:0033627	cell adhesion mediated by integrin	-3.1	5.5	4.8	24156	71	370	6	1.6	0.66	3273|3383|3673|3685|5054|8754	HRG|ICAM1|ITGA2|ITGAV|SERPINE1|ADAM9	-1.7	Input ID
GO-BP	19	GO:0051591	response to cAMP	-3.1	4.7	4.5	24156	98	370	7	1.9	0.71	189|1373|2353|3725|3939|5313|6781	AGXT|CPS1|FOS|JUN|LDHA|PKLR|STC1	-1.6	Input ID
GO-BP	19	GO:0090277	positive regulation of peptide hormone secretion	-3.1	4.7	4.5	24156	98	370	7	1.9	0.71	18|2822|3091|5950|6659|7036|55107	ABAT|GPLD1|HIF1A|RBP4|SOX4|TFR2|ANO1	-1.6	Input ID
GO-BP	19	GO:0030316	osteoclast differentiation	-3.1	4.7	4.5	24156	98	370	7	1.9	0.71	302|1880|2207|2353|7107|7305|28962	ANXA2|GPR183|FCER1G|FOS|GPR137B|TYROBP|OSTM1	-1.6	Input ID
GO-BP	19	GO:0008015	blood circulation	-3.1	2.3	3.8	24156	544	370	19	5.1	1.1	18|133|483|491|1373|1579|1839|3162|3383|3827|4018|4973|5345|5997|6781|7852|8529|27347|59342	ABAT|ADM|ATP1B3|ATP2B2|CPS1|CYP4A11|HBEGF|HMOX1|ICAM1|KNG1|LPA|OLR1|SERPINF2|RGS2|STC1|CXCR4|CYP4F2|STK39|SCPEP1	-1.6	Input ID
GO-BP	19	GO:0071407	cellular response to organic cyclic compound	-3.1	2.3	3.8	24156	544	370	19	5.1	1.1	383|1373|1581|1601|2822|3383|3673|3956|5106|5244|5313|6696|6781|7538|8856|9314|9970|54541|81035	ARG1|CPS1|CYP7A1|DAB2|GPLD1|ICAM1|ITGA2|LGALS1|PCK2|ABCB4|PKLR|SPP1|STC1|ZFP36|NR1I2|KLF4|NR1I3|DDIT4|COLEC12	-1.6	Input ID
GO-BP	19	GO:0034110	regulation of homotypic cell-cell adhesion	-3.1	9.3	5.5	24156	28	370	4	1.1	0.54	18|3956|5270|5329	ABAT|LGALS1|SERPINE2|PLAUR	-1.6	Input ID
GO-BP	19	GO:1903579	negative regulation of ATP metabolic process	-3.1	9.3	5.5	24156	28	370	4	1.1	0.54	2203|51085|54541|55022	FBP1|MLXIPL|DDIT4|PID1	-1.6	Input ID
GO-BP	19	GO:0008209	androgen metabolic process	-3.1	9.3	5.5	24156	28	370	4	1.1	0.54	133|6696|6718|7923	ADM|SPP1|AKR1D1|HSD17B8	-1.6	Input ID
GO-BP	19	GO:0019395	fatty acid oxidation	-3.1	4.6	4.5	24156	99	370	7	1.9	0.71	1962|5264|8309|11001|55268|84649|285440	EHHADH|PHYH|ACOX2|SLC27A2|ECHDC2|DGAT2|CYP4V2	-1.6	Input ID
GO-BP	19	GO:0001558	regulation of cell growth	-3.1	2.5	3.8	24156	421	370	16	4.3	1.1	1808|1839|2023|2203|2539|3273|3486|5270|5538|5997|6279|6280|6696|7852|22883|29948	DPYSL2|HBEGF|ENO1|FBP1|G6PD|HRG|IGFBP3|SERPINE2|PPT1|RGS2|S100A8|S100A9|SPP1|CXCR4|CLSTN1|OSGIN1	-1.6	Input ID
GO-BP	19	GO:0007160	cell-matrix adhesion	-3.1	3.1	4.1	24156	229	370	11	3	0.88	960|2041|3273|3673|3685|4321|5054|6370|8754|23603|54749	CD44|EPHA1|HRG|ITGA2|ITGAV|MMP12|SERPINE1|CCL25|ADAM9|CORO1C|EPDR1	-1.6	Input ID
GO-BP	19	GO:0051223	regulation of protein transport	-3.1	2.1	3.7	24156	725	370	23	6.2	1.3	18|283|335|665|1992|2822|3091|4321|5066|5552|5621|5950|6513|6514|6659|7097|7114|7128|8754|9520|27242|55107|84868	ABAT|ANG|APOA1|BNIP3L|SERPINB1|GPLD1|HIF1A|MMP12|PAM|SRGN|PRNP|RBP4|SLC2A1|SLC2A2|SOX4|TLR2|TMSB4X|TNFAIP3|ADAM9|NPEPPS|TNFRSF21|ANO1|HAVCR2	-1.6	Input ID
GO-BP	19	GO:0015837	amine transport	-3.1	4.6	4.5	24156	100	370	7	1.9	0.71	18|383|5997|6529|8564|10991|27347	ABAT|ARG1|RGS2|SLC6A1|KMO|SLC38A3|STK39	-1.6	Input ID
GO-BP	19	GO:0030301	cholesterol transport	-3.1	4.6	4.5	24156	100	370	7	1.9	0.71	302|335|344|345|5244|5360|5444	ANXA2|APOA1|APOC2|APOC3|ABCB4|PLTP|PON1	-1.6	Input ID
GO-BP	19	GO:0022600	digestive system process	-3.1	4.6	4.5	24156	100	370	7	1.9	0.71	335|5950|6514|9245|27347|65267|80168	APOA1|RBP4|SLC2A2|GCNT3|STK39|WNK3|MOGAT2	-1.6	Input ID
GO-BP	19	GO:0032024	positive regulation of insulin secretion	-3.1	5.4	4.7	24156	73	370	6	1.6	0.66	18|2822|3091|5950|6659|55107	ABAT|GPLD1|HIF1A|RBP4|SOX4|ANO1	-1.6	Input ID
GO-BP	19	GO:0043627	response to estrogen	-3.1	5.4	4.7	24156	73	370	6	1.6	0.66	335|2155|3162|3939|5272|100133941	APOA1|F7|HMOX1|LDHA|SERPINB9|CD24	-1.6	Input ID
GO-BP	19	GO:0001649	osteoblast differentiation	-3	3.1	4	24156	230	370	11	3	0.88	847|1192|1462|3486|3491|3570|4015|4851|6696|10457|115908	CAT|CLIC1|VCAN|IGFBP3|CCN1|IL6R|LOX|NOTCH1|SPP1|GPNMB|CTHRC1	-1.6	Input ID
GO-BP	19	GO:0070201	regulation of establishment of protein localization	-3	2	3.6	24156	772	370	24	6.5	1.3	18|283|335|665|1992|2822|3091|4321|5066|5552|5621|5950|6513|6514|6659|7097|7114|7128|8754|9520|10576|27242|55107|84868	ABAT|ANG|APOA1|BNIP3L|SERPINB1|GPLD1|HIF1A|MMP12|PAM|SRGN|PRNP|RBP4|SLC2A1|SLC2A2|SOX4|TLR2|TMSB4X|TNFAIP3|ADAM9|NPEPPS|CCT2|TNFRSF21|ANO1|HAVCR2	-1.6	Input ID
GO-BP	19	GO:0001774	microglial cell activation	-3	6.7	4.9	24156	49	370	5	1.4	0.6	728|1075|3725|7097|7305	C5AR1|CTSC|JUN|TLR2|TYROBP	-1.6	Input ID
GO-BP	19	GO:0002269	leukocyte activation involved in inflammatory response	-3	6.7	4.9	24156	49	370	5	1.4	0.6	728|1075|3725|7097|7305	C5AR1|CTSC|JUN|TLR2|TYROBP	-1.6	Input ID
GO-BP	19	GO:0051235	maintenance of location	-3	2.7	3.9	24156	343	370	14	3.8	0.99	123|335|1649|3099|3685|5552|6279|6280|6676|7114|9168|29923|30001|84649	PLIN2|APOA1|DDIT3|HK2|ITGAV|SRGN|S100A8|S100A9|SPAG4|TMSB4X|TMSB10|HILPDA|ERO1A|DGAT2	-1.6	Input ID
GO-BP	19	GO:0034370	triglyceride-rich lipoprotein particle remodeling	-3	15	6.3	24156	13	370	3	0.81	0.47	335|344|345	APOA1|APOC2|APOC3	-1.6	Input ID
GO-BP	19	GO:0051956	negative regulation of amino acid transport	-3	15	6.3	24156	13	370	3	0.81	0.47	18|5997|27347	ABAT|RGS2|STK39	-1.6	Input ID
GO-BP	19	GO:0006002	fructose 6-phosphate metabolic process	-3	15	6.3	24156	13	370	3	0.81	0.47	2203|3099|5214	FBP1|HK2|PFKP	-1.6	Input ID
GO-BP	19	GO:0061042	vascular wound healing	-3	15	6.3	24156	13	370	3	0.81	0.47	5054|7128|7852	SERPINE1|TNFAIP3|CXCR4	-1.6	Input ID
GO-BP	19	GO:0043271	negative regulation of ion transport	-3	3.6	4.2	24156	162	370	9	2.4	0.8	18|3383|4318|5270|5997|6781|8529|27347|65267	ABAT|ICAM1|MMP9|SERPINE2|RGS2|STC1|CYP4F2|STK39|WNK3	-1.6	Input ID
GO-BP	19	GO:0042742	defense response to bacterium	-3	2.7	3.9	24156	344	370	14	3.8	0.99	728|2207|3570|4069|5054|6279|6280|6364|6372|7097|81035|84868|114770|653808	C5AR1|FCER1G|IL6R|LYZ|SERPINE1|S100A8|S100A9|CCL20|CXCL6|TLR2|COLEC12|HAVCR2|PGLYRP2|ZG16	-1.6	Input ID
GO-BP	19	GO:0048661	positive regulation of smooth muscle cell proliferation	-3	4.5	4.4	24156	101	370	7	1.9	0.71	1839|3162|3570|3673|3725|4318|5345	HBEGF|HMOX1|IL6R|ITGA2|JUN|MMP9|SERPINF2	-1.6	Input ID
GO-BP	19	GO:1903038	negative regulation of leukocyte cell-cell adhesion	-3	4	4.3	24156	131	370	8	2.2	0.76	383|5621|6370|9314|10457|11326|27242|84868	ARG1|PRNP|CCL25|KLF4|GPNMB|VSIG4|TNFRSF21|HAVCR2	-1.6	Input ID
GO-BP	19	GO:1903792	negative regulation of anion transport	-3	9	5.4	24156	29	370	4	1.1	0.54	18|5997|8529|27347	ABAT|RGS2|CYP4F2|STK39	-1.6	Input ID
GO-BP	19	GO:0010954	positive regulation of protein processing	-3	9	5.4	24156	29	370	4	1.1	0.54	729|2023|2161|3818	C6|ENO1|F12|KLKB1	-1.6	Input ID
GO-BP	19	GO:0015914	phospholipid transport	-3	5.3	4.6	24156	74	370	6	1.6	0.66	335|344|345|4363|5244|5360	APOA1|APOC2|APOC3|ABCC1|ABCB4|PLTP	-1.6	Input ID
GO-BP	19	GO:1901616	organic hydroxy compound catabolic process	-3	5.3	4.6	24156	74	370	6	1.6	0.66	1579|1581|1593|4051|6718|8529	CYP4A11|CYP7A1|CYP27A1|CYP4F3|AKR1D1|CYP4F2	-1.6	Input ID
GO-BP	19	GO:2000377	regulation of reactive oxygen species metabolic process	-3	3.3	4.1	24156	197	370	10	2.7	0.84	2539|3091|3099|3383|5446|7305|7498|9104|9314|55022	G6PD|HIF1A|HK2|ICAM1|PON3|TYROBP|XDH|RGN|KLF4|PID1	-1.6	Input ID
GO-BP	19	GO:0003013	circulatory system process	-3	2.2	3.7	24156	554	370	19	5.1	1.1	18|133|483|491|1373|1579|1839|3162|3383|3827|4018|4973|5345|5997|6781|7852|8529|27347|59342	ABAT|ADM|ATP1B3|ATP2B2|CPS1|CYP4A11|HBEGF|HMOX1|ICAM1|KNG1|LPA|OLR1|SERPINF2|RGS2|STC1|CXCR4|CYP4F2|STK39|SCPEP1	-1.6	Input ID
GO-BP	19	GO:0034599	cellular response to oxidative stress	-3	2.7	3.9	24156	309	370	13	3.5	0.96	383|847|2119|2353|2539|3091|3162|3725|4318|7128|9104|9314|30001	ARG1|CAT|ETV5|FOS|G6PD|HIF1A|HMOX1|JUN|MMP9|TNFAIP3|RGN|KLF4|ERO1A	-1.5	Input ID
GO-BP	19	GO:0046887	positive regulation of hormone secretion	-3	3.9	4.2	24156	133	370	8	2.2	0.76	18|2822|3091|5950|6659|6696|7036|55107	ABAT|GPLD1|HIF1A|RBP4|SOX4|SPP1|TFR2|ANO1	-1.5	Input ID
GO-BP	19	GO:0007159	leukocyte cell-cell adhesion	-3	2.6	3.8	24156	349	370	14	3.8	0.99	383|960|3383|3956|5621|6279|6280|6370|9314|10457|11326|27242|84868|100133941	ARG1|CD44|ICAM1|LGALS1|PRNP|S100A8|S100A9|CCL25|KLF4|GPNMB|VSIG4|TNFRSF21|HAVCR2|CD24	-1.5	Input ID
GO-BP	19	GO:0001667	ameboidal-type cell migration	-3	2.4	3.7	24156	472	370	17	4.6	1.1	335|1839|2822|3091|3162|3273|3673|3725|4318|4851|5217|6781|7114|8754|9314|23603|54443	APOA1|HBEGF|GPLD1|HIF1A|HMOX1|HRG|ITGA2|JUN|MMP9|NOTCH1|PFN2|STC1|TMSB4X|ADAM9|KLF4|CORO1C|ANLN	-1.5	Input ID
GO-BP	19	GO:2001242	regulation of intrinsic apoptotic signaling pathway	-3	3.5	4.1	24156	166	370	9	2.4	0.8	960|1649|1687|2023|3091|4318|5329|6279|6280	CD44|DDIT3|GSDME|ENO1|HIF1A|MMP9|PLAUR|S100A8|S100A9	-1.5	Input ID
GO-BP	19	GO:0051017	actin filament bundle assembly	-3	3.5	4.1	24156	166	370	9	2.4	0.8	335|390|2041|4082|4739|5217|5345|83715|84952	APOA1|RND3|EPHA1|MARCKS|NEDD9|PFN2|SERPINF2|ESPN|CGNL1	-1.5	Input ID
GO-BP	19	GO:0000302	response to reactive oxygen species	-3	3	3.9	24156	236	370	11	3	0.88	383|847|2353|3162|3725|3939|4318|7128|8754|9104|9314	ARG1|CAT|FOS|HMOX1|JUN|LDHA|MMP9|TNFAIP3|ADAM9|RGN|KLF4	-1.5	Input ID
GO-BP	19	GO:0006695	cholesterol biosynthetic process	-3	5.2	4.5	24156	76	370	6	1.6	0.66	335|1581|2539|3158|6319|7108	APOA1|CYP7A1|G6PD|HMGCS2|SCD|TM7SF2	-1.5	Input ID
GO-BP	19	GO:0030029	actin filament-based process	-2.9	2	3.5	24156	785	370	24	6.5	1.3	226|283|335|390|2041|3273|3383|4082|4739|5066|5217|5345|6781|7114|7305|8470|9168|23433|23603|54443|83715|84952|114793|283431	ALDOA|ANG|APOA1|RND3|EPHA1|HRG|ICAM1|MARCKS|NEDD9|PAM|PFN2|SERPINF2|STC1|TMSB4X|TYROBP|SORBS2|TMSB10|RHOQ|CORO1C|ANLN|ESPN|CGNL1|FMNL2|GAS2L3	-1.5	Input ID
GO-BP	19	GO:0031349	positive regulation of defense response	-2.9	2.3	3.6	24156	517	370	18	4.9	1.1	383|1075|2161|2207|3263|3673|3818|4321|4363|5054|6279|6280|7097|7128|9180|23643|81035|84868	ARG1|CTSC|F12|FCER1G|HPX|ITGA2|KLKB1|MMP12|ABCC1|SERPINE1|S100A8|S100A9|TLR2|TNFAIP3|OSMR|LY96|COLEC12|HAVCR2	-1.5	Input ID
GO-BP	19	GO:0050746	regulation of lipoprotein metabolic process	-2.9	14	6.1	24156	14	370	3	0.81	0.47	3685|10400|84649	ITGAV|PEMT|DGAT2	-1.5	Input ID
GO-BP	19	GO:0010867	positive regulation of triglyceride biosynthetic process	-2.9	14	6.1	24156	14	370	3	0.81	0.47	2822|9104|84649	GPLD1|RGN|DGAT2	-1.5	Input ID
GO-BP	19	GO:0051547	regulation of keratinocyte migration	-2.9	14	6.1	24156	14	370	3	0.81	0.47	1839|4318|8754	HBEGF|MMP9|ADAM9	-1.5	Input ID
GO-BP	19	GO:0070486	leukocyte aggregation	-2.9	14	6.1	24156	14	370	3	0.81	0.47	960|6279|6280	CD44|S100A8|S100A9	-1.5	Input ID
GO-BP	19	GO:0002920	regulation of humoral immune response	-2.9	3.9	4.2	24156	135	370	8	2.2	0.76	714|728|729|732|1361|3263|10877|11326	C1QC|C5AR1|C6|C8B|CPB2|HPX|CFHR4|VSIG4	-1.5	Input ID
GO-BP	19	GO:0002687	positive regulation of leukocyte migration	-2.9	3.9	4.2	24156	135	370	8	2.2	0.76	728|2155|3383|3570|3673|5054|6364|27347	C5AR1|F7|ICAM1|IL6R|ITGA2|SERPINE1|CCL20|STK39	-1.5	Input ID
GO-BP	19	GO:0051828	entry into other organism involved in symbiotic interaction	-2.9	3.9	4.2	24156	135	370	8	2.2	0.76	3383|3673|3685|3956|6510|6554|7852|653808	ICAM1|ITGA2|ITGAV|LGALS1|SLC1A5|SLC10A1|CXCR4|ZG16	-1.5	Input ID
GO-BP	19	GO:0034440	lipid oxidation	-2.9	4.4	4.3	24156	105	370	7	1.9	0.71	1962|5264|8309|11001|55268|84649|285440	EHHADH|PHYH|ACOX2|SLC27A2|ECHDC2|DGAT2|CYP4V2	-1.5	Input ID
GO-BP	19	GO:0002675	positive regulation of acute inflammatory response	-2.9	8.4	5.2	24156	31	370	4	1.1	0.54	2161|2207|3818|9180	F12|FCER1G|KLKB1|OSMR	-1.5	Input ID
GO-BP	19	GO:1900543	negative regulation of purine nucleotide metabolic process	-2.9	8.4	5.2	24156	31	370	4	1.1	0.54	2203|51085|54541|55022	FBP1|MLXIPL|DDIT4|PID1	-1.5	Input ID
GO-BP	19	GO:0071549	cellular response to dexamethasone stimulus	-2.9	8.4	5.2	24156	31	370	4	1.1	0.54	383|3383|5106|54541	ARG1|ICAM1|PCK2|DDIT4	-1.5	Input ID
GO-BP	19	GO:0060249	anatomical structure homeostasis	-2.9	2.4	3.7	24156	437	370	16	4.3	1.1	226|491|563|3091|4015|4069|4851|5340|5950|6696|7107|7128|10576|23498|27347|79888	ALDOA|ATP2B2|AZGP1|HIF1A|LOX|LYZ|NOTCH1|PLG|RBP4|SPP1|GPR137B|TNFAIP3|CCT2|HAAO|STK39|LPCAT1	-1.5	Input ID
GO-BP	19	GO:0006855	drug transmembrane transport	-2.9	5	4.4	24156	78	370	6	1.6	0.66	5997|6510|6535|6580|10166|10991	RGS2|SLC1A5|SLC6A8|SLC22A1|SLC25A15|SLC38A3	-1.5	Input ID
GO-BP	19	GO:0007492	endoderm development	-2.9	5	4.4	24156	78	370	6	1.6	0.66	1847|3685|3912|4318|4851|22943	DUSP5|ITGAV|LAMB1|MMP9|NOTCH1|DKK1	-1.5	Input ID
GO-BP	19	GO:0050921	positive regulation of chemotaxis	-2.9	3.8	4.1	24156	137	370	8	2.2	0.76	728|2155|3570|3673|5054|7114|7852|27347	C5AR1|F7|IL6R|ITGA2|SERPINE1|TMSB4X|CXCR4|STK39	-1.5	Input ID
GO-BP	19	GO:0061572	actin filament bundle organization	-2.9	3.5	4	24156	170	370	9	2.4	0.8	335|390|2041|4082|4739|5217|5345|83715|84952	APOA1|RND3|EPHA1|MARCKS|NEDD9|PFN2|SERPINF2|ESPN|CGNL1	-1.5	Input ID
GO-BP	19	GO:0007178	transmembrane receptor protein serine/threonine kinase signaling pathway	-2.9	2.6	3.7	24156	356	370	14	3.8	0.99	335|1601|2353|3491|3725|4015|4851|8754|9518|22943|25805|57530|148738|164656	APOA1|DAB2|FOS|CCN1|JUN|LOX|NOTCH1|ADAM9|GDF15|DKK1|BAMBI|CGN|HJV|TMPRSS6	-1.5	Input ID
GO-BP	19	GO:0002685	regulation of leukocyte migration	-2.9	3.2	3.9	24156	205	370	10	2.7	0.84	728|2155|3162|3383|3570|3673|5054|6364|6370|27347	C5AR1|F7|HMOX1|ICAM1|IL6R|ITGA2|SERPINE1|CCL20|CCL25|STK39	-1.5	Input ID
GO-BP	19	GO:1902653	secondary alcohol biosynthetic process	-2.9	5	4.4	24156	79	370	6	1.6	0.66	335|1581|2539|3158|6319|7108	APOA1|CYP7A1|G6PD|HMGCS2|SCD|TM7SF2	-1.5	Input ID
GO-BP	19	GO:0019221	cytokine-mediated signaling pathway	-2.9	2	3.5	24156	796	370	24	6.5	1.3	302|335|383|960|2207|2353|3091|3162|3263|3383|3570|4312|4318|4321|6364|6370|6372|6374|7114|7128|7852|9180|27347|100133941	ANXA2|APOA1|ARG1|CD44|FCER1G|FOS|HIF1A|HMOX1|HPX|ICAM1|IL6R|MMP1|MMP9|MMP12|CCL20|CCL25|CXCL6|CXCL5|TMSB4X|TNFAIP3|CXCR4|OSMR|STK39|CD24	-1.5	Input ID
GO-BP	19	GO:0042573	retinoic acid metabolic process	-2.9	8.2	5.1	24156	32	370	4	1.1	0.54	124|1551|1577|59342	ADH1A|CYP3A7|CYP3A5|SCPEP1	-1.4	Input ID
GO-BP	19	GO:0010543	regulation of platelet activation	-2.9	8.2	5.1	24156	32	370	4	1.1	0.54	18|2207|3273|5270	ABAT|FCER1G|HRG|SERPINE2	-1.4	Input ID
GO-BP	19	GO:0008210	estrogen metabolic process	-2.9	8.2	5.1	24156	32	370	4	1.1	0.54	1551|1559|1577|7923	CYP3A7|CYP2C9|CYP3A5|HSD17B8	-1.4	Input ID
GO-BP	19	GO:0045980	negative regulation of nucleotide metabolic process	-2.9	8.2	5.1	24156	32	370	4	1.1	0.54	2203|51085|54541|55022	FBP1|MLXIPL|DDIT4|PID1	-1.4	Input ID
GO-BP	19	GO:0007586	digestion	-2.9	3.8	4.1	24156	139	370	8	2.2	0.76	335|5950|6514|6718|9245|27347|65267|80168	APOA1|RBP4|SLC2A2|AKR1D1|GCNT3|STK39|WNK3|MOGAT2	-1.4	Input ID
GO-BP	19	GO:0051402	neuron apoptotic process	-2.9	3	3.8	24156	243	370	11	3	0.88	728|1649|2539|3091|3162|3725|5538|5621|7305|27242|112399	C5AR1|DDIT3|G6PD|HIF1A|HMOX1|JUN|PPT1|PRNP|TYROBP|TNFRSF21|EGLN3	-1.4	Input ID
GO-BP	19	GO:0001706	endoderm formation	-2.9	6	4.6	24156	54	370	5	1.4	0.6	1847|3685|3912|4318|22943	DUSP5|ITGAV|LAMB1|MMP9|DKK1	-1.4	Input ID
GO-BP	19	GO:1902532	negative regulation of intracellular signal transduction	-2.9	2.2	3.5	24156	571	370	19	5.1	1.1	467|960|1649|1847|1848|2023|2203|3091|4318|5270|5329|5621|5997|7114|7128|7498|9314|54541|84952	ATF3|CD44|DDIT3|DUSP5|DUSP6|ENO1|FBP1|HIF1A|MMP9|SERPINE2|PLAUR|PRNP|RGS2|TMSB4X|TNFAIP3|XDH|KLF4|DDIT4|CGNL1	-1.4	Input ID
GO-BP	19	GO:0000098	sulfur amino acid catabolic process	-2.8	13	5.8	24156	15	370	3	0.81	0.47	189|4143|7263	AGXT|MAT1A|TST	-1.4	Input ID
GO-BP	19	GO:0019471	4-hydroxyproline metabolic process	-2.8	13	5.8	24156	15	370	3	0.81	0.47	2806|30001|112399	GOT2|ERO1A|EGLN3	-1.4	Input ID
GO-BP	19	GO:0070207	protein homotrimerization	-2.8	13	5.8	24156	15	370	3	0.81	0.47	241|6510|171425	ALOX5AP|SLC1A5|CLYBL	-1.4	Input ID
GO-BP	19	GO:0070365	hepatocyte differentiation	-2.8	13	5.8	24156	15	370	3	0.81	0.47	1373|3673|5106	CPS1|ITGA2|PCK2	-1.4	Input ID
GO-BP	19	GO:0055072	iron ion homeostasis	-2.8	4.9	4.4	24156	80	370	6	1.6	0.66	3091|3162|3263|7036|148738|164656	HIF1A|HMOX1|HPX|TFR2|HJV|TMPRSS6	-1.4	Input ID
GO-BP	19	GO:0006110	regulation of glycolytic process	-2.8	4.9	4.4	24156	80	370	6	1.6	0.66	2203|3091|5209|5210|51085|54541	FBP1|HIF1A|PFKFB3|PFKFB4|MLXIPL|DDIT4	-1.4	Input ID
GO-BP	19	GO:0032640	tumor necrosis factor production	-2.8	3.4	3.9	24156	173	370	9	2.4	0.8	2207|7097|7128|7305|7538|10457|23643|84868|653808	FCER1G|TLR2|TNFAIP3|TYROBP|ZFP36|GPNMB|LY96|HAVCR2|ZG16	-1.4	Input ID
GO-BP	19	GO:0097530	granulocyte migration	-2.8	3.7	4	24156	140	370	8	2.2	0.76	728|2207|6279|6280|6364|6370|6372|6374	C5AR1|FCER1G|S100A8|S100A9|CCL20|CCL25|CXCL6|CXCL5	-1.4	Input ID
GO-BP	19	GO:0048871	multicellular organismal homeostasis	-2.8	2.3	3.6	24156	487	370	17	4.6	1.1	18|563|1579|1649|4069|4851|5950|6319|6696|7107|7128|7852|8529|10400|27347|51085|79888	ABAT|AZGP1|CYP4A11|DDIT3|LYZ|NOTCH1|RBP4|SCD|SPP1|GPR137B|TNFAIP3|CXCR4|CYP4F2|PEMT|STK39|MLXIPL|LPCAT1	-1.4	Input ID
GO-BP	19	GO:0050880	regulation of blood vessel size	-2.8	3.7	4	24156	141	370	8	2.2	0.76	133|1373|3162|3383|3827|5345|5997|59342	ADM|CPS1|HMOX1|ICAM1|KNG1|SERPINF2|RGS2|SCPEP1	-1.4	Input ID
GO-BP	19	GO:0097746	regulation of blood vessel diameter	-2.8	3.7	4	24156	141	370	8	2.2	0.76	133|1373|3162|3383|3827|5345|5997|59342	ADM|CPS1|HMOX1|ICAM1|KNG1|SERPINF2|RGS2|SCPEP1	-1.4	Input ID
GO-BP	19	GO:0035296	regulation of tube diameter	-2.8	3.7	4	24156	141	370	8	2.2	0.76	133|1373|3162|3383|3827|5345|5997|59342	ADM|CPS1|HMOX1|ICAM1|KNG1|SERPINF2|RGS2|SCPEP1	-1.4	Input ID
GO-BP	19	GO:0032663	regulation of interleukin-2 production	-2.8	5.9	4.6	24156	55	370	5	1.4	0.6	5621|7128|7538|11326|84868	PRNP|TNFAIP3|ZFP36|VSIG4|HAVCR2	-1.4	Input ID
GO-BP	19	GO:0050679	positive regulation of epithelial cell proliferation	-2.8	3.1	3.8	24156	210	370	10	2.7	0.84	283|383|728|3091|3162|3725|3912|4321|4851|7128	ANG|ARG1|C5AR1|HIF1A|HMOX1|JUN|LAMB1|MMP12|NOTCH1|TNFAIP3	-1.4	Input ID
GO-BP	19	GO:0044319	wound healing, spreading of cells	-2.8	7.9	5	24156	33	370	4	1.1	0.54	960|1839|3491|4321	CD44|HBEGF|CCN1|MMP12	-1.4	Input ID
GO-BP	19	GO:0036003	positive regulation of transcription from RNA polymerase II promoter in response to stress	-2.8	7.9	5	24156	33	370	4	1.1	0.54	467|1649|3091|4851	ATF3|DDIT3|HIF1A|NOTCH1	-1.4	Input ID
GO-BP	19	GO:0090505	epiboly involved in wound healing	-2.8	7.9	5	24156	33	370	4	1.1	0.54	960|1839|3491|4321	CD44|HBEGF|CCN1|MMP12	-1.4	Input ID
GO-BP	19	GO:0010634	positive regulation of epithelial cell migration	-2.8	3.4	3.9	24156	175	370	9	2.4	0.8	1839|2822|3091|3162|3673|3725|4318|7114|8754	HBEGF|GPLD1|HIF1A|HMOX1|ITGA2|JUN|MMP9|TMSB4X|ADAM9	-1.4	Input ID
GO-BP	19	GO:0051099	positive regulation of binding	-2.8	3.4	3.9	24156	175	370	9	2.4	0.8	302|3673|4318|5329|5444|9314|22919|25805|115908	ANXA2|ITGA2|MMP9|PLAUR|PON1|KLF4|MAPRE1|BAMBI|CTHRC1	-1.4	Input ID
GO-BP	19	GO:0035150	regulation of tube size	-2.8	3.7	4	24156	142	370	8	2.2	0.76	133|1373|3162|3383|3827|5345|5997|59342	ADM|CPS1|HMOX1|ICAM1|KNG1|SERPINF2|RGS2|SCPEP1	-1.4	Input ID
GO-BP	19	GO:0016049	cell growth	-2.8	2.3	3.5	24156	490	370	17	4.6	1.1	1808|1839|2023|2203|2539|3273|3486|5270|5538|5997|6279|6280|6696|7852|8470|22883|29948	DPYSL2|HBEGF|ENO1|FBP1|G6PD|HRG|IGFBP3|SERPINE2|PPT1|RGS2|S100A8|S100A9|SPP1|CXCR4|SORBS2|CLSTN1|OSGIN1	-1.4	Input ID
GO-BP	19	GO:0062014	negative regulation of small molecule metabolic process	-2.8	4.1	4.1	24156	111	370	7	1.9	0.71	345|1581|2203|51085|54541|55022|84649	APOC3|CYP7A1|FBP1|MLXIPL|DDIT4|PID1|DGAT2	-1.4	Input ID
GO-BP	19	GO:1904659	glucose transmembrane transport	-2.8	4.1	4.1	24156	111	370	7	1.9	0.71	3099|6513|6514|6515|23433|28999|55022	HK2|SLC2A1|SLC2A2|SLC2A3|RHOQ|KLF15|PID1	-1.4	Input ID
GO-BP	19	GO:0048259	regulation of receptor-mediated endocytosis	-2.8	4.1	4.1	24156	111	370	7	1.9	0.71	302|344|345|1601|5054|5538|22943	ANXA2|APOC2|APOC3|DAB2|SERPINE1|PPT1|DKK1	-1.4	Input ID
GO-BP	19	GO:0002886	regulation of myeloid leukocyte mediated immunity	-2.8	5.8	4.5	24156	56	370	5	1.4	0.6	383|1776|2207|3162|6372	ARG1|DNASE1L3|FCER1G|HMOX1|CXCL6	-1.4	Input ID
GO-BP	19	GO:0097529	myeloid leukocyte migration	-2.8	3.1	3.8	24156	212	370	10	2.7	0.84	728|2207|3570|5054|6279|6280|6364|6370|6372|6374	C5AR1|FCER1G|IL6R|SERPINE1|S100A8|S100A9|CCL20|CCL25|CXCL6|CXCL5	-1.4	Input ID
GO-BP	19	GO:0015918	sterol transport	-2.8	4.1	4.1	24156	112	370	7	1.9	0.71	302|335|344|345|5244|5360|5444	ANXA2|APOA1|APOC2|APOC3|ABCB4|PLTP|PON1	-1.4	Input ID
GO-BP	19	GO:0015802	basic amino acid transport	-2.8	12	5.6	24156	16	370	3	0.81	0.47	383|9056|10991	ARG1|SLC7A7|SLC38A3	-1.4	Input ID
GO-BP	19	GO:0019372	lipoxygenase pathway	-2.8	12	5.6	24156	16	370	3	0.81	0.47	241|5444|5446	ALOX5AP|PON1|PON3	-1.4	Input ID
GO-BP	19	GO:0015812	gamma-aminobutyric acid transport	-2.8	12	5.6	24156	16	370	3	0.81	0.47	18|6529|6535	ABAT|SLC6A1|SLC6A8	-1.4	Input ID
GO-BP	19	GO:0043523	regulation of neuron apoptotic process	-2.8	3.1	3.8	24156	213	370	10	2.7	0.84	728|1649|2539|3091|3162|3725|5538|5621|7305|112399	C5AR1|DDIT3|G6PD|HIF1A|HMOX1|JUN|PPT1|PRNP|TYROBP|EGLN3	-1.4	Input ID
GO-BP	19	GO:0046470	phosphatidylcholine metabolic process	-2.8	4.7	4.2	24156	83	370	6	1.6	0.66	335|2822|5444|10400|79887|79888	APOA1|GPLD1|PON1|PEMT|PLBD1|LPCAT1	-1.4	Input ID
GO-BP	19	GO:0030811	regulation of nucleotide catabolic process	-2.8	4.7	4.2	24156	83	370	6	1.6	0.66	2203|3091|5209|5210|51085|54541	FBP1|HIF1A|PFKFB3|PFKFB4|MLXIPL|DDIT4	-1.4	Input ID
GO-BP	19	GO:0090504	epiboly	-2.8	7.7	4.9	24156	34	370	4	1.1	0.54	960|1839|3491|4321	CD44|HBEGF|CCN1|MMP12	-1.4	Input ID
GO-BP	19	GO:0010922	positive regulation of phosphatase activity	-2.8	7.7	4.9	24156	34	370	4	1.1	0.54	2822|3673|9104|23645	GPLD1|ITGA2|RGN|PPP1R15A	-1.4	Input ID
GO-BP	19	GO:0071706	tumor necrosis factor superfamily cytokine production	-2.8	3.3	3.8	24156	178	370	9	2.4	0.8	2207|7097|7128|7305|7538|10457|23643|84868|653808	FCER1G|TLR2|TNFAIP3|TYROBP|ZFP36|GPNMB|LY96|HAVCR2|ZG16	-1.4	Input ID
GO-BP	19	GO:0046165	alcohol biosynthetic process	-2.8	3.3	3.8	24156	178	370	9	2.4	0.8	335|427|1581|1593|2539|3158|5106|6319|7108	APOA1|ASAH1|CYP7A1|CYP27A1|G6PD|HMGCS2|PCK2|SCD|TM7SF2	-1.4	Input ID
GO-BP	19	GO:0060760	positive regulation of response to cytokine stimulus	-2.7	5.7	4.5	24156	57	370	5	1.4	0.6	3091|3263|4321|7097|7852	HIF1A|HPX|MMP12|TLR2|CXCR4	-1.4	Input ID
GO-BP	19	GO:0045862	positive regulation of proteolysis	-2.7	2.5	3.6	24156	370	370	14	3.8	0.99	729|1075|1601|2023|2161|2822|3491|3818|6279|6280|7498|8754|9104|112399	C6|CTSC|DAB2|ENO1|F12|GPLD1|CCN1|KLKB1|S100A8|S100A9|XDH|ADAM9|RGN|EGLN3	-1.4	Input ID
GO-BP	19	GO:0016126	sterol biosynthetic process	-2.7	4.7	4.2	24156	84	370	6	1.6	0.66	335|1581|2539|3158|6319|7108	APOA1|CYP7A1|G6PD|HMGCS2|SCD|TM7SF2	-1.3	Input ID
GO-BP	19	GO:0043281	regulation of cysteine-type endopeptidase activity involved in apoptotic process	-2.7	3	3.7	24156	215	370	10	2.7	0.84	960|3491|4318|5272|5329|6279|6280|7498|9314|112399	CD44|CCN1|MMP9|SERPINB9|PLAUR|S100A8|S100A9|XDH|KLF4|EGLN3	-1.3	Input ID
GO-BP	19	GO:0008645	hexose transmembrane transport	-2.7	4	4	24156	114	370	7	1.9	0.71	3099|6513|6514|6515|23433|28999|55022	HK2|SLC2A1|SLC2A2|SLC2A3|RHOQ|KLF15|PID1	-1.3	Input ID
GO-BP	19	GO:0010675	regulation of cellular carbohydrate metabolic process	-2.7	3.6	3.9	24156	146	370	8	2.2	0.76	2203|2822|3486|3795|9104|27232|54541|84649	FBP1|GPLD1|IGFBP3|KHK|RGN|GNMT|DDIT4|DGAT2	-1.3	Input ID
GO-BP	19	GO:0042542	response to hydrogen peroxide	-2.7	3.6	3.9	24156	146	370	8	2.2	0.76	383|847|3162|3725|3939|7128|8754|9314	ARG1|CAT|HMOX1|JUN|LDHA|TNFAIP3|ADAM9|KLF4	-1.3	Input ID
GO-BP	19	GO:0051260	protein homooligomerization	-2.7	3.3	3.8	24156	180	370	9	2.4	0.8	226|241|4143|5214|5621|6510|27232|51733|171425	ALDOA|ALOX5AP|MAT1A|PFKP|PRNP|SLC1A5|GNMT|UPB1|CLYBL	-1.3	Input ID
GO-BP	19	GO:0032781	positive regulation of ATPase activity	-2.7	5.6	4.4	24156	58	370	5	1.4	0.6	229|483|5217|7114|9104	ALDOB|ATP1B3|PFN2|TMSB4X|RGN	-1.3	Input ID
GO-BP	19	GO:0002011	morphogenesis of an epithelial sheet	-2.7	5.6	4.4	24156	58	370	5	1.4	0.6	960|1839|3491|4321|4851	CD44|HBEGF|CCN1|MMP12|NOTCH1	-1.3	Input ID
GO-BP	19	GO:0051954	positive regulation of amine transport	-2.7	7.5	4.8	24156	35	370	4	1.1	0.54	18|6529|8564|10991	ABAT|SLC6A1|KMO|SLC38A3	-1.3	Input ID
GO-BP	19	GO:0050663	cytokine secretion	-2.7	2.8	3.6	24156	255	370	11	3	0.88	335|1992|3685|4321|4851|5552|7097|7114|7128|27242|84868	APOA1|SERPINB1|ITGAV|MMP12|NOTCH1|SRGN|TLR2|TMSB4X|TNFAIP3|TNFRSF21|HAVCR2	-1.3	Input ID
GO-BP	19	GO:0070206	protein trimerization	-2.7	12	5.4	24156	17	370	3	0.81	0.47	241|6510|171425	ALOX5AP|SLC1A5|CLYBL	-1.3	Input ID
GO-BP	19	GO:0010875	positive regulation of cholesterol efflux	-2.7	12	5.4	24156	17	370	3	0.81	0.47	335|5360|5444	APOA1|PLTP|PON1	-1.3	Input ID
GO-BP	19	GO:0006112	energy reserve metabolic process	-2.7	4.6	4.1	24156	86	370	6	1.6	0.66	2538|2998|3795|5502|27232|55022	G6PC|GYS2|KHK|PPP1R1A|GNMT|PID1	-1.3	Input ID
GO-BP	19	GO:0032722	positive regulation of chemokine production	-2.7	5.5	4.3	24156	59	370	5	1.4	0.6	3091|3162|3570|7097|84868	HIF1A|HMOX1|IL6R|TLR2|HAVCR2	-1.3	Input ID
GO-BP	19	GO:0033344	cholesterol efflux	-2.7	5.5	4.3	24156	59	370	5	1.4	0.6	335|344|345|5360|5444	APOA1|APOC2|APOC3|PLTP|PON1	-1.3	Input ID
GO-BP	19	GO:0031102	neuron projection regeneration	-2.7	5.5	4.3	24156	59	370	5	1.4	0.6	133|335|3725|6696|9314	ADM|APOA1|JUN|SPP1|KLF4	-1.3	Input ID
GO-BP	19	GO:1904645	response to amyloid-beta	-2.7	5.5	4.3	24156	59	370	5	1.4	0.6	3383|4318|4321|4363|5621	ICAM1|MMP9|MMP12|ABCC1|PRNP	-1.3	Input ID
GO-BP	19	GO:0015749	monosaccharide transmembrane transport	-2.7	3.9	4	24156	116	370	7	1.9	0.71	3099|6513|6514|6515|23433|28999|55022	HK2|SLC2A1|SLC2A2|SLC2A3|RHOQ|KLF15|PID1	-1.3	Input ID
GO-BP	19	GO:0030449	regulation of complement activation	-2.7	3.9	4	24156	116	370	7	1.9	0.71	714|728|729|732|1361|10877|11326	C1QC|C5AR1|C6|C8B|CPB2|CFHR4|VSIG4	-1.3	Input ID
GO-BP	19	GO:0032633	interleukin-4 production	-2.7	7.3	4.7	24156	36	370	4	1.1	0.54	2207|4851|84868|653808	FCER1G|NOTCH1|HAVCR2|ZG16	-1.3	Input ID
GO-BP	19	GO:0050710	negative regulation of cytokine secretion	-2.7	4.5	4.1	24156	87	370	6	1.6	0.66	335|1992|5552|7114|7128|27242	APOA1|SERPINB1|SRGN|TMSB4X|TNFAIP3|TNFRSF21	-1.3	Input ID
GO-BP	19	GO:0051262	protein tetramerization	-2.7	4.5	4.1	24156	87	370	6	1.6	0.66	226|4143|5214|7923|27232|51733	ALDOA|MAT1A|PFKP|HSD17B8|GNMT|UPB1	-1.3	Input ID
GO-BP	19	GO:1902041	regulation of extrinsic apoptotic signaling pathway via death domain receptors	-2.6	5.4	4.3	24156	60	370	5	1.4	0.6	467|3162|3383|5054|7128	ATF3|HMOX1|ICAM1|SERPINE1|TNFAIP3	-1.3	Input ID
GO-BP	19	GO:0033013	tetrapyrrole metabolic process	-2.6	5.4	4.3	24156	60	370	5	1.4	0.6	3162|3263|4363|4594|171425	HMOX1|HPX|ABCC1|MMUT|CLYBL	-1.3	Input ID
GO-BP	19	GO:0051289	protein homotetramerization	-2.6	5.4	4.3	24156	60	370	5	1.4	0.6	226|4143|5214|27232|51733	ALDOA|MAT1A|PFKP|GNMT|UPB1	-1.3	Input ID
GO-BP	19	GO:0034219	carbohydrate transmembrane transport	-2.6	3.9	3.9	24156	118	370	7	1.9	0.71	3099|6513|6514|6515|23433|28999|55022	HK2|SLC2A1|SLC2A2|SLC2A3|RHOQ|KLF15|PID1	-1.3	Input ID
GO-BP	19	GO:0071417	cellular response to organonitrogen compound	-2.6	2.1	3.3	24156	597	370	19	5.1	1.1	383|1373|2538|2822|3383|4363|5106|5313|5315|5621|6781|9314|9518|11031|23433|28999|55022|55107|58528	ARG1|CPS1|G6PC|GPLD1|ICAM1|ABCC1|PCK2|PKLR|PKM|PRNP|STC1|KLF4|GDF15|RAB31|RHOQ|KLF15|PID1|ANO1|RRAGD	-1.3	Input ID
GO-BP	19	GO:0030308	negative regulation of cell growth	-2.6	3.2	3.7	24156	186	370	9	2.4	0.8	2023|2203|2539|3273|5270|5538|5997|6696|29948	ENO1|FBP1|G6PD|HRG|SERPINE2|PPT1|RGS2|SPP1|OSGIN1	-1.3	Input ID
GO-BP	19	GO:0030099	myeloid cell differentiation	-2.6	2.3	3.4	24156	423	370	15	4.1	1	302|714|1880|2207|2353|2539|3091|3725|4015|4318|7097|7107|7305|7538|28962	ANXA2|C1QC|GPR183|FCER1G|FOS|G6PD|HIF1A|JUN|LOX|MMP9|TLR2|GPR137B|TYROBP|ZFP36|OSTM1	-1.3	Input ID
GO-BP	19	GO:0010906	regulation of glucose metabolic process	-2.6	3.8	3.9	24156	119	370	7	1.9	0.71	2203|2822|3486|3795|9104|27232|84649	FBP1|GPLD1|IGFBP3|KHK|RGN|GNMT|DGAT2	-1.3	Input ID
GO-BP	19	GO:0016999	antibiotic metabolic process	-2.6	3.4	3.8	24156	152	370	8	2.2	0.76	124|847|5106|7915|10841|55526|55753|80896	ADH1A|CAT|PCK2|ALDH5A1|FTCD|DHTKD1|OGDHL|NPL	-1.2	Input ID
GO-BP	19	GO:0050713	negative regulation of interleukin-1 beta secretion	-2.6	11	5.2	24156	18	370	3	0.81	0.47	335|1992|7128	APOA1|SERPINB1|TNFAIP3	-1.2	Input ID
GO-BP	19	GO:0060192	negative regulation of lipase activity	-2.6	11	5.2	24156	18	370	3	0.81	0.47	335|345|5997	APOA1|APOC3|RGS2	-1.2	Input ID
GO-BP	19	GO:0010766	negative regulation of sodium ion transport	-2.6	11	5.2	24156	18	370	3	0.81	0.47	5270|27347|65267	SERPINE2|STK39|WNK3	-1.2	Input ID
GO-BP	19	GO:2001170	negative regulation of ATP biosynthetic process	-2.6	11	5.2	24156	18	370	3	0.81	0.47	2203|54541|55022	FBP1|DDIT4|PID1	-1.2	Input ID
GO-BP	19	GO:0006089	lactate metabolic process	-2.6	11	5.2	24156	18	370	3	0.81	0.47	3029|3091|3939	HAGH|HIF1A|LDHA	-1.2	Input ID
GO-BP	19	GO:0014074	response to purine-containing compound	-2.6	3.4	3.7	24156	153	370	8	2.2	0.76	189|1373|2353|3725|3939|5313|6529|6781	AGXT|CPS1|FOS|JUN|LDHA|PKLR|SLC6A1|STC1	-1.2	Input ID
GO-BP	19	GO:0043903	regulation of symbiosis, encompassing mutualism through parasitism	-2.6	2.9	3.6	24156	225	370	10	2.7	0.84	302|383|3685|3725|3956|4851|6372|7538|7852|653808	ANXA2|ARG1|ITGAV|JUN|LGALS1|NOTCH1|CXCL6|ZFP36|CXCR4|ZG16	-1.2	Input ID
GO-BP	19	GO:0043470	regulation of carbohydrate catabolic process	-2.6	4.4	4	24156	90	370	6	1.6	0.66	2203|3091|5209|5210|51085|54541	FBP1|HIF1A|PFKFB3|PFKFB4|MLXIPL|DDIT4	-1.2	Input ID
GO-BP	19	GO:0071276	cellular response to cadmium ion	-2.6	6.9	4.5	24156	38	370	4	1.1	0.54	2353|3162|3725|4318	FOS|HMOX1|JUN|MMP9	-1.2	Input ID
GO-BP	19	GO:0015804	neutral amino acid transport	-2.6	6.9	4.5	24156	38	370	4	1.1	0.54	5997|6510|10991|81539	RGS2|SLC1A5|SLC38A3|SLC38A1	-1.2	Input ID
GO-BP	19	GO:0045923	positive regulation of fatty acid metabolic process	-2.6	6.9	4.5	24156	38	370	4	1.1	0.54	335|344|9104|51085	APOA1|APOC2|RGN|MLXIPL	-1.2	Input ID
GO-BP	19	GO:0050892	intestinal absorption	-2.6	6.9	4.5	24156	38	370	4	1.1	0.54	335|6514|9245|80168	APOA1|SLC2A2|GCNT3|MOGAT2	-1.2	Input ID
GO-BP	19	GO:0051193	regulation of cofactor metabolic process	-2.6	3.8	3.8	24156	121	370	7	1.9	0.71	2203|3091|5209|5210|51085|54541|171425	FBP1|HIF1A|PFKFB3|PFKFB4|MLXIPL|DDIT4|CLYBL	-1.2	Input ID
GO-BP	19	GO:0046718	viral entry into host cell	-2.6	3.8	3.8	24156	121	370	7	1.9	0.71	3383|3673|3685|3956|6510|6554|7852	ICAM1|ITGA2|ITGAV|LGALS1|SLC1A5|SLC10A1|CXCR4	-1.2	Input ID
GO-BP	19	GO:0070663	regulation of leukocyte proliferation	-2.6	2.9	3.6	24156	226	370	10	2.7	0.84	383|1880|5621|7128|7305|10457|11326|27242|84868|100133941	ARG1|GPR183|PRNP|TNFAIP3|TYROBP|GPNMB|VSIG4|TNFRSF21|HAVCR2|CD24	-1.2	Input ID
GO-BP	19	GO:0051702	interaction with symbiont	-2.6	4.3	3.9	24156	91	370	6	1.6	0.66	302|383|3273|3725|5340|6372	ANXA2|ARG1|HRG|JUN|PLG|CXCL6	-1.2	Input ID
GO-BP	19	GO:0002698	negative regulation of immune effector process	-2.6	3.7	3.8	24156	122	370	7	1.9	0.71	335|383|3162|5272|11326|84868|114770	APOA1|ARG1|HMOX1|SERPINB9|VSIG4|HAVCR2|PGLYRP2	-1.2	Input ID
GO-BP	19	GO:0046503	glycerolipid catabolic process	-2.6	5.2	4.1	24156	63	370	5	1.4	0.6	335|344|345|1373|2822	APOA1|APOC2|APOC3|CPS1|GPLD1	-1.2	Input ID
GO-BP	19	GO:0071248	cellular response to metal ion	-2.5	3.1	3.6	24156	191	370	9	2.4	0.8	241|2203|2353|2822|3162|3725|4318|5621|7036	ALOX5AP|FBP1|FOS|GPLD1|HMOX1|JUN|MMP9|PRNP|TFR2	-1.2	Input ID
GO-BP	19	GO:0010985	negative regulation of lipoprotein particle clearance	-2.5	10	5.1	24156	19	370	3	0.81	0.47	344|345|29116	APOC2|APOC3|MYLIP	-1.2	Input ID
GO-BP	19	GO:0042789	mRNA transcription by RNA polymerase II	-2.5	10	5.1	24156	19	370	3	0.81	0.47	728|1649|3091	C5AR1|DDIT3|HIF1A	-1.2	Input ID
GO-BP	19	GO:0070989	oxidative demethylation	-2.5	10	5.1	24156	19	370	3	0.81	0.47	1551|1559|1577	CYP3A7|CYP2C9|CYP3A5	-1.2	Input ID
GO-BP	19	GO:0006555	methionine metabolic process	-2.5	10	5.1	24156	19	370	3	0.81	0.47	635|4143|27232	BHMT|MAT1A|GNMT	-1.2	Input ID
GO-BP	19	GO:0051546	keratinocyte migration	-2.5	10	5.1	24156	19	370	3	0.81	0.47	1839|4318|8754	HBEGF|MMP9|ADAM9	-1.2	Input ID
GO-BP	19	GO:0019730	antimicrobial humoral response	-2.5	3.7	3.8	24156	123	370	7	1.9	0.71	3273|4069|6279|6280|6372|6374|114770	HRG|LYZ|S100A8|S100A9|CXCL6|CXCL5|PGLYRP2	-1.2	Input ID
GO-BP	19	GO:0050832	defense response to fungus	-2.5	6.7	4.4	24156	39	370	4	1.1	0.54	383|3273|6279|6280	ARG1|HRG|S100A8|S100A9	-1.2	Input ID
GO-BP	19	GO:0071674	mononuclear cell migration	-2.5	4.3	3.9	24156	92	370	6	1.6	0.66	728|3570|5054|5340|6364|6370	C5AR1|IL6R|SERPINE1|PLG|CCL20|CCL25	-1.2	Input ID
GO-BP	19	GO:0001890	placenta development	-2.5	3.3	3.6	24156	157	370	8	2.2	0.76	133|283|3091|3491|5340|6696|6781|55224	ADM|ANG|HIF1A|CCN1|PLG|SPP1|STC1|ETNK2	-1.2	Input ID
GO-BP	19	GO:0002437	inflammatory response to antigenic stimulus	-2.5	5.1	4.1	24156	64	370	5	1.4	0.6	462|2207|3383|4851|9240	SERPINC1|FCER1G|ICAM1|NOTCH1|PNMA1	-1.2	Input ID
GO-BP	19	GO:1901699	cellular response to nitrogen compound	-2.5	2	3.2	24156	660	370	20	5.4	1.2	383|1373|2538|2822|3383|4363|5106|5313|5315|5621|6781|9314|9518|11031|23433|28999|55022|55107|58528|81035	ARG1|CPS1|G6PC|GPLD1|ICAM1|ABCC1|PCK2|PKLR|PKM|PRNP|STC1|KLF4|GDF15|RAB31|RHOQ|KLF15|PID1|ANO1|RRAGD|COLEC12	-1.2	Input ID
GO-BP	19	GO:0048713	regulation of oligodendrocyte differentiation	-2.5	6.5	4.4	24156	40	370	4	1.1	0.54	4851|7097|7852|27242	NOTCH1|TLR2|CXCR4|TNFRSF21	-1.1	Input ID
GO-BP	19	GO:0043467	regulation of generation of precursor metabolites and energy	-2.5	3.3	3.6	24156	159	370	8	2.2	0.76	2203|3091|3795|5209|5210|5230|51085|54541	FBP1|HIF1A|KHK|PFKFB3|PFKFB4|PGK1|MLXIPL|DDIT4	-1.1	Input ID
GO-BP	19	GO:0051259	protein complex oligomerization	-2.5	2.8	3.5	24156	232	370	10	2.7	0.84	226|241|4143|5214|5621|6510|7923|27232|51733|171425	ALDOA|ALOX5AP|MAT1A|PFKP|PRNP|SLC1A5|HSD17B8|GNMT|UPB1|CLYBL	-1.1	Input ID
GO-BP	19	GO:2001234	negative regulation of apoptotic signaling pathway	-2.5	2.8	3.4	24156	233	370	10	2.7	0.84	960|2023|3091|3162|3383|3685|4318|5054|5329|7128	CD44|ENO1|HIF1A|HMOX1|ICAM1|ITGAV|MMP9|SERPINE1|PLAUR|TNFAIP3	-1.1	Input ID
GO-BP	19	GO:0001704	formation of primary germ layer	-2.5	3.6	3.7	24156	126	370	7	1.9	0.71	1847|3673|3685|3912|4318|9314|22943	DUSP5|ITGA2|ITGAV|LAMB1|MMP9|KLF4|DKK1	-1.1	Input ID
GO-BP	19	GO:0044057	regulation of system process	-2.5	2	3.2	24156	617	370	19	5.1	1.1	18|133|335|483|491|1075|1839|2023|2539|3383|3673|4851|5997|6781|9314|23316|27242|27347|65267	ABAT|ADM|APOA1|ATP1B3|ATP2B2|CTSC|HBEGF|ENO1|G6PD|ICAM1|ITGA2|NOTCH1|RGS2|STC1|KLF4|CUX2|TNFRSF21|STK39|WNK3	-1.1	Input ID
GO-BP	19	GO:0030856	regulation of epithelial cell differentiation	-2.5	3.3	3.6	24156	160	370	8	2.2	0.76	4318|4851|5054|5624|7498|7538|23764|100133941	MMP9|NOTCH1|SERPINE1|PROC|XDH|ZFP36|MAFF|CD24	-1.1	Input ID
GO-BP	19	GO:0043691	reverse cholesterol transport	-2.5	9.8	4.9	24156	20	370	3	0.81	0.47	335|344|345	APOA1|APOC2|APOC3	-1.1	Input ID
GO-BP	19	GO:0098581	detection of external biotic stimulus	-2.5	9.8	4.9	24156	20	370	3	0.81	0.47	7097|23643|114770	TLR2|LY96|PGLYRP2	-1.1	Input ID
GO-BP	19	GO:0010988	regulation of low-density lipoprotein particle clearance	-2.5	9.8	4.9	24156	20	370	3	0.81	0.47	302|345|29116	ANXA2|APOC3|MYLIP	-1.1	Input ID
GO-BP	19	GO:0006071	glycerol metabolic process	-2.5	9.8	4.9	24156	20	370	3	0.81	0.47	5106|80168|84649	PCK2|MOGAT2|DGAT2	-1.1	Input ID
GO-BP	19	GO:0050678	regulation of epithelial cell proliferation	-2.5	2.3	3.3	24156	396	370	14	3.8	0.99	283|383|728|1361|3091|3162|3725|3912|4321|4851|7128|7498|7538|9104	ANG|ARG1|C5AR1|CPB2|HIF1A|HMOX1|JUN|LAMB1|MMP12|NOTCH1|TNFAIP3|XDH|ZFP36|RGN	-1.1	Input ID
GO-BP	19	GO:2000378	negative regulation of reactive oxygen species metabolic process	-2.5	4.9	4	24156	66	370	5	1.4	0.6	2539|3091|3099|5446|9104	G6PD|HIF1A|HK2|PON3|RGN	-1.1	Input ID
GO-BP	19	GO:1901655	cellular response to ketone	-2.5	4.1	3.8	24156	95	370	6	1.6	0.66	383|3383|5106|6696|9314|54541	ARG1|ICAM1|PCK2|SPP1|KLF4|DDIT4	-1.1	Input ID
GO-BP	19	GO:0045833	negative regulation of lipid metabolic process	-2.5	4.1	3.8	24156	95	370	6	1.6	0.66	344|345|1581|2822|79888|84649	APOC2|APOC3|CYP7A1|GPLD1|LPCAT1|DGAT2	-1.1	Input ID
GO-BP	19	GO:0035821	modification of morphology or physiology of other organism	-2.5	3.2	3.6	24156	161	370	8	2.2	0.76	302|383|3273|3725|4069|5272|6280|6372	ANXA2|ARG1|HRG|JUN|LYZ|SERPINB9|S100A9|CXCL6	-1.1	Input ID
GO-BP	19	GO:0019218	regulation of steroid metabolic process	-2.5	3.6	3.7	24156	127	370	7	1.9	0.71	133|335|427|1581|6319|7108|84649	ADM|APOA1|ASAH1|CYP7A1|SCD|TM7SF2|DGAT2	-1.1	Input ID
GO-BP	19	GO:0014013	regulation of gliogenesis	-2.5	3.6	3.7	24156	127	370	7	1.9	0.71	1880|2119|4851|5270|7097|7852|27242	GPR183|ETV5|NOTCH1|SERPINE2|TLR2|CXCR4|TNFRSF21	-1.1	Input ID
GO-BP	19	GO:0007179	transforming growth factor beta receptor signaling pathway	-2.5	3	3.5	24156	197	370	9	2.4	0.8	335|1601|2353|3725|4015|8754|9518|25805|57530	APOA1|DAB2|FOS|JUN|LOX|ADAM9|GDF15|BAMBI|CGN	-1.1	Input ID
GO-BP	19	GO:1902042	negative regulation of extrinsic apoptotic signaling pathway via death domain receptors	-2.5	6.4	4.3	24156	41	370	4	1.1	0.54	3162|3383|5054|7128	HMOX1|ICAM1|SERPINE1|TNFAIP3	-1.1	Input ID
GO-BP	19	GO:0050714	positive regulation of protein secretion	-2.5	2.6	3.4	24156	274	370	11	3	0.88	18|283|2822|3091|4321|5950|6659|7097|8754|55107|84868	ABAT|ANG|GPLD1|HIF1A|MMP12|RBP4|SOX4|TLR2|ADAM9|ANO1|HAVCR2	-1.1	Input ID
GO-BP	19	GO:2000146	negative regulation of cell motility	-2.4	2.4	3.3	24156	356	370	13	3.5	0.96	2041|3162|3273|3486|4851|5054|5217|6370|6781|9104|9314|23603|58516	EPHA1|HMOX1|HRG|IGFBP3|NOTCH1|SERPINE1|PFN2|CCL25|STC1|RGN|KLF4|CORO1C|SINHCAF	-1.1	Input ID
GO-BP	19	GO:0034612	response to tumor necrosis factor	-2.4	2.5	3.3	24156	315	370	12	3.2	0.92	335|427|1687|3383|6364|6370|7114|7128|7538|8754|27242|55022	APOA1|ASAH1|GSDME|ICAM1|CCL20|CCL25|TMSB4X|TNFAIP3|ZFP36|ADAM9|TNFRSF21|PID1	-1.1	Input ID
GO-BP	19	GO:1903037	regulation of leukocyte cell-cell adhesion	-2.4	2.5	3.3	24156	315	370	12	3.2	0.92	383|960|3383|3956|5621|6370|9314|10457|11326|27242|84868|100133941	ARG1|CD44|ICAM1|LGALS1|PRNP|CCL25|KLF4|GPNMB|VSIG4|TNFRSF21|HAVCR2|CD24	-1.1	Input ID
GO-BP	19	GO:0051196	regulation of coenzyme metabolic process	-2.4	4.1	3.8	24156	96	370	6	1.6	0.66	2203|3091|5209|5210|51085|54541	FBP1|HIF1A|PFKFB3|PFKFB4|MLXIPL|DDIT4	-1.1	Input ID
GO-BP	19	GO:0050764	regulation of phagocytosis	-2.4	4.1	3.8	24156	96	370	6	1.6	0.66	335|2207|3673|3685|7097|11031	APOA1|FCER1G|ITGA2|ITGAV|TLR2|RAB31	-1.1	Input ID
GO-BP	19	GO:0048662	negative regulation of smooth muscle cell proliferation	-2.4	4.9	4	24156	67	370	5	1.4	0.6	283|3162|3486|7128|9314	ANG|HMOX1|IGFBP3|TNFAIP3|KLF4	-1.1	Input ID
GO-BP	19	GO:0046879	hormone secretion	-2.4	2.5	3.3	24156	316	370	12	3.2	0.92	18|133|2822|3091|5950|6513|6514|6567|6659|6696|7036|55107	ABAT|ADM|GPLD1|HIF1A|RBP4|SLC2A1|SLC2A2|SLC16A2|SOX4|SPP1|TFR2|ANO1	-1.1	Input ID
GO-BP	19	GO:0050711	negative regulation of interleukin-1 secretion	-2.4	9.3	4.8	24156	21	370	3	0.81	0.47	335|1992|7128	APOA1|SERPINB1|TNFAIP3	-1.1	Input ID
GO-BP	19	GO:0030809	negative regulation of nucleotide biosynthetic process	-2.4	9.3	4.8	24156	21	370	3	0.81	0.47	2203|54541|55022	FBP1|DDIT4|PID1	-1.1	Input ID
GO-BP	19	GO:0006206	pyrimidine nucleobase metabolic process	-2.4	9.3	4.8	24156	21	370	3	0.81	0.47	1373|1807|1808	CPS1|DPYS|DPYSL2	-1.1	Input ID
GO-BP	19	GO:1900372	negative regulation of purine nucleotide biosynthetic process	-2.4	9.3	4.8	24156	21	370	3	0.81	0.47	2203|54541|55022	FBP1|DDIT4|PID1	-1.1	Input ID
GO-BP	19	GO:0034389	lipid droplet organization	-2.4	9.3	4.8	24156	21	370	3	0.81	0.47	5738|29923|345275	PTGFRN|HILPDA|HSD17B13	-1.1	Input ID
GO-BP	19	GO:0009067	aspartate family amino acid biosynthetic process	-2.4	9.3	4.8	24156	21	370	3	0.81	0.47	635|2806|5352	BHMT|GOT2|PLOD2	-1.1	Input ID
GO-BP	19	GO:0036499	PERK-mediated unfolded protein response	-2.4	9.3	4.8	24156	21	370	3	0.81	0.47	467|1649|23645	ATF3|DDIT3|PPP1R15A	-1.1	Input ID
GO-BP	19	GO:0006816	calcium ion transport	-2.4	2.2	3.2	24156	446	370	15	4.1	1	302|308|491|1649|2539|3383|3685|5621|6781|7852|9104|27075|30001|55013|65267	ANXA2|ANXA5|ATP2B2|DDIT3|G6PD|ICAM1|ITGAV|PRNP|STC1|CXCR4|RGN|TSPAN13|ERO1A|MCUB|WNK3	-1.1	Input ID
GO-BP	19	GO:2000116	regulation of cysteine-type endopeptidase activity	-2.4	2.7	3.4	24156	239	370	10	2.7	0.84	960|3491|4318|5272|5329|6279|6280|7498|9314|112399	CD44|CCN1|MMP9|SERPINB9|PLAUR|S100A8|S100A9|XDH|KLF4|EGLN3	-1.1	Input ID
GO-BP	19	GO:0034446	substrate adhesion-dependent cell spreading	-2.4	4	3.7	24156	98	370	6	1.6	0.66	335|2041|3685|3912|4739|23603	APOA1|EPHA1|ITGAV|LAMB1|NEDD9|CORO1C	-1.1	Input ID
GO-BP	19	GO:0015980	energy derivation by oxidation of organic compounds	-2.4	2.6	3.3	24156	279	370	11	3	0.88	847|2538|2998|3091|3795|5502|7915|27232|55022|55526|55753	CAT|G6PC|GYS2|HIF1A|KHK|PPP1R1A|ALDH5A1|GNMT|PID1|DHTKD1|OGDHL	-1.1	Input ID
GO-BP	19	GO:0031344	regulation of cell projection organization	-2.4	1.9	3.1	24156	723	370	21	5.7	1.2	960|1808|3273|3383|3673|3956|5217|5621|5997|6280|6696|7852|9314|22943|23316|23433|23603|29116|50807|54443|83715	CD44|DPYSL2|HRG|ICAM1|ITGA2|LGALS1|PFN2|PRNP|RGS2|S100A9|SPP1|CXCR4|KLF4|DKK1|CUX2|RHOQ|CORO1C|MYLIP|ASAP1|ANLN|ESPN	-1.1	Input ID
GO-BP	19	GO:0015909	long-chain fatty acid transport	-2.4	4.7	3.9	24156	69	370	5	1.4	0.6	123|10998|11000|11001|84647	PLIN2|SLC27A5|SLC27A3|SLC27A2|PLA2G12B	-1.1	Input ID
GO-BP	19	GO:0045687	positive regulation of glial cell differentiation	-2.4	6.1	4.2	24156	43	370	4	1.1	0.54	4851|5270|7097|7852	NOTCH1|SERPINE2|TLR2|CXCR4	-1.1	Input ID
GO-BP	19	GO:0002449	lymphocyte mediated immunity	-2.4	2.3	3.2	24156	364	370	13	3.5	0.96	383|563|714|729|732|1075|2207|3263|3383|5272|9245|10747|84868	ARG1|AZGP1|C1QC|C6|C8B|CTSC|FCER1G|HPX|ICAM1|SERPINB9|GCNT3|MASP2|HAVCR2	-1	Input ID
GO-BP	19	GO:0050865	regulation of cell activation	-2.4	2	3.1	24156	632	370	19	5.1	1.1	18|383|1075|1880|2207|3162|3273|3956|5270|5621|7107|7128|7305|10457|11326|27242|84868|114770|100133941	ABAT|ARG1|CTSC|GPR183|FCER1G|HMOX1|HRG|LGALS1|SERPINE2|PRNP|GPR137B|TNFAIP3|TYROBP|GPNMB|VSIG4|TNFRSF21|HAVCR2|PGLYRP2|CD24	-1	Input ID
GO-BP	19	GO:0045860	positive regulation of protein kinase activity	-2.4	2.1	3.1	24156	540	370	17	4.6	1.1	283|728|1164|1847|1848|3491|3570|4739|5621|7852|8754|9518|22943|23531|27347|56892|100133941	ANG|C5AR1|CKS2|DUSP5|DUSP6|CCN1|IL6R|NEDD9|PRNP|CXCR4|ADAM9|GDF15|DKK1|MMD|STK39|TCIM|CD24	-1	Input ID
GO-BP	19	GO:0051701	interaction with host	-2.4	2.9	3.4	24156	204	370	9	2.4	0.8	3383|3673|3685|3956|5272|6510|6554|7852|653808	ICAM1|ITGA2|ITGAV|LGALS1|SERPINB9|SLC1A5|SLC10A1|CXCR4|ZG16	-1	Input ID
GO-BP	19	GO:0044264	cellular polysaccharide metabolic process	-2.4	3.9	3.6	24156	100	370	6	1.6	0.66	2538|2998|3795|5502|27232|84002	G6PC|GYS2|KHK|PPP1R1A|GNMT|B3GNT5	-1	Input ID
GO-BP	19	GO:0009235	cobalamin metabolic process	-2.4	8.9	4.6	24156	22	370	3	0.81	0.47	4363|4594|171425	ABCC1|MMUT|CLYBL	-1	Input ID
GO-BP	19	GO:0034138	toll-like receptor 3 signaling pathway	-2.4	8.9	4.6	24156	22	370	3	0.81	0.47	7128|81035|84868	TNFAIP3|COLEC12|HAVCR2	-1	Input ID
GO-BP	19	GO:0060055	angiogenesis involved in wound healing	-2.4	8.9	4.6	24156	22	370	3	0.81	0.47	5054|7128|7852	SERPINE1|TNFAIP3|CXCR4	-1	Input ID
GO-BP	19	GO:1903077	negative regulation of protein localization to plasma membrane	-2.4	8.9	4.6	24156	22	370	3	0.81	0.47	1601|23433|55022	DAB2|RHOQ|PID1	-1	Input ID
GO-BP	19	GO:0046339	diacylglycerol metabolic process	-2.4	8.9	4.6	24156	22	370	3	0.81	0.47	283|80168|84649	ANG|MOGAT2|DGAT2	-1	Input ID
GO-BP	19	GO:0010866	regulation of triglyceride biosynthetic process	-2.4	8.9	4.6	24156	22	370	3	0.81	0.47	2822|9104|84649	GPLD1|RGN|DGAT2	-1	Input ID
GO-BP	19	GO:0002460	adaptive immune response based on somatic recombination of immune receptors built from immunoglobuli	-2.3	2.3	3.2	24156	366	370	13	3.5	0.96	383|563|714|729|732|1075|2207|3263|3383|7128|9245|10747|84868	ARG1|AZGP1|C1QC|C6|C8B|CTSC|FCER1G|HPX|ICAM1|TNFAIP3|GCNT3|MASP2|HAVCR2	-1	Input ID
GO-BP	19	GO:0055026	negative regulation of cardiac muscle tissue development	-2.3	5.9	4.1	24156	44	370	4	1.1	0.54	2539|5950|5997|22943	G6PD|RBP4|RGS2|DKK1	-1	Input ID
GO-BP	19	GO:0060627	regulation of vesicle-mediated transport	-2.3	2	3.1	24156	544	370	17	4.6	1.1	302|335|344|345|1601|2207|3162|3673|3685|4851|5054|5217|5538|7036|7097|11031|22943	ANXA2|APOA1|APOC2|APOC3|DAB2|FCER1G|HMOX1|ITGA2|ITGAV|NOTCH1|SERPINE1|PFN2|PPT1|TFR2|TLR2|RAB31|DKK1	-1	Input ID
GO-BP	19	GO:0032680	regulation of tumor necrosis factor production	-2.3	3.1	3.4	24156	169	370	8	2.2	0.76	2207|7097|7128|7305|7538|10457|23643|84868	FCER1G|TLR2|TNFAIP3|TYROBP|ZFP36|GPNMB|LY96|HAVCR2	-1	Input ID
GO-BP	19	GO:0002703	regulation of leukocyte mediated immunity	-2.3	2.9	3.3	24156	206	370	9	2.4	0.8	383|563|1776|2207|3162|3263|5272|6372|84868	ARG1|AZGP1|DNASE1L3|FCER1G|HMOX1|HPX|SERPINB9|CXCL6|HAVCR2	-1	Input ID
GO-BP	19	GO:0030260	entry into host cell	-2.3	3.4	3.5	24156	134	370	7	1.9	0.71	3383|3673|3685|3956|6510|6554|7852	ICAM1|ITGA2|ITGAV|LGALS1|SLC1A5|SLC10A1|CXCR4	-1	Input ID
GO-BP	19	GO:0051806	entry into cell of other organism involved in symbiotic interaction	-2.3	3.4	3.5	24156	134	370	7	1.9	0.71	3383|3673|3685|3956|6510|6554|7852	ICAM1|ITGA2|ITGAV|LGALS1|SLC1A5|SLC10A1|CXCR4	-1	Input ID
GO-BP	19	GO:0044409	entry into host	-2.3	3.4	3.5	24156	134	370	7	1.9	0.71	3383|3673|3685|3956|6510|6554|7852	ICAM1|ITGA2|ITGAV|LGALS1|SLC1A5|SLC10A1|CXCR4	-1	Input ID
GO-BP	19	GO:0030258	lipid modification	-2.3	2.7	3.3	24156	245	370	10	2.7	0.84	335|1551|1577|1962|5264|8309|11001|55268|84649|285440	APOA1|CYP3A7|CYP3A5|EHHADH|PHYH|ACOX2|SLC27A2|ECHDC2|DGAT2|CYP4V2	-1	Input ID
GO-BP	19	GO:0035987	endodermal cell differentiation	-2.3	5.8	4	24156	45	370	4	1.1	0.54	3685|3912|4318|22943	ITGAV|LAMB1|MMP9|DKK1	-0.99	Input ID
GO-BP	19	GO:0051154	negative regulation of striated muscle cell differentiation	-2.3	5.8	4	24156	45	370	4	1.1	0.54	2539|4851|5997|22943	G6PD|NOTCH1|RGS2|DKK1	-0.99	Input ID
GO-BP	19	GO:0006022	aminoglycan metabolic process	-2.3	3.1	3.4	24156	171	370	8	2.2	0.76	960|1462|3697|3698|3699|23670|84002|114770	CD44|VCAN|ITIH1|ITIH2|ITIH3|CEMIP2|B3GNT5|PGLYRP2	-0.99	Input ID
GO-BP	19	GO:0071560	cellular response to transforming growth factor beta stimulus	-2.3	2.6	3.2	24156	247	370	10	2.7	0.84	335|383|1601|2353|3725|4015|8754|9518|25805|57530	APOA1|ARG1|DAB2|FOS|JUN|LOX|ADAM9|GDF15|BAMBI|CGN	-0.99	Input ID
GO-BP	19	GO:0002438	acute inflammatory response to antigenic stimulus	-2.3	8.5	4.5	24156	23	370	3	0.81	0.47	462|2207|3383	SERPINC1|FCER1G|ICAM1	-0.99	Input ID
GO-BP	19	GO:0019400	alditol metabolic process	-2.3	8.5	4.5	24156	23	370	3	0.81	0.47	5106|80168|84649	PCK2|MOGAT2|DGAT2	-0.99	Input ID
GO-BP	19	GO:2000726	negative regulation of cardiac muscle cell differentiation	-2.3	8.5	4.5	24156	23	370	3	0.81	0.47	2539|5997|22943	G6PD|RGS2|DKK1	-0.99	Input ID
GO-BP	19	GO:0009595	detection of biotic stimulus	-2.3	8.5	4.5	24156	23	370	3	0.81	0.47	7097|23643|114770	TLR2|LY96|PGLYRP2	-0.99	Input ID
GO-BP	19	GO:0032799	low-density lipoprotein receptor particle metabolic process	-2.3	8.5	4.5	24156	23	370	3	0.81	0.47	302|3685|29116	ANXA2|ITGAV|MYLIP	-0.99	Input ID
GO-BP	19	GO:2000379	positive regulation of reactive oxygen species metabolic process	-2.3	3.8	3.6	24156	103	370	6	1.6	0.66	3383|7305|7498|9104|9314|55022	ICAM1|TYROBP|XDH|RGN|KLF4|PID1	-0.98	Input ID
GO-BP	19	GO:0090276	regulation of peptide hormone secretion	-2.3	2.8	3.3	24156	209	370	9	2.4	0.8	18|2822|3091|5950|6513|6514|6659|7036|55107	ABAT|GPLD1|HIF1A|RBP4|SLC2A1|SLC2A2|SOX4|TFR2|ANO1	-0.98	Input ID
GO-BP	19	GO:1903555	regulation of tumor necrosis factor superfamily cytokine production	-2.3	3	3.3	24156	172	370	8	2.2	0.76	2207|7097|7128|7305|7538|10457|23643|84868	FCER1G|TLR2|TNFAIP3|TYROBP|ZFP36|GPNMB|LY96|HAVCR2	-0.98	Input ID
GO-BP	19	GO:0043433	negative regulation of DNA-binding transcription factor activity	-2.3	3	3.3	24156	172	370	8	2.2	0.76	847|1649|3162|5621|7114|7128|9314|84868	CAT|DDIT3|HMOX1|PRNP|TMSB4X|TNFAIP3|KLF4|HAVCR2	-0.98	Input ID
GO-BP	19	GO:0005977	glycogen metabolic process	-2.3	4.5	3.7	24156	73	370	5	1.4	0.6	2538|2998|3795|5502|27232	G6PC|GYS2|KHK|PPP1R1A|GNMT	-0.97	Input ID
GO-BP	19	GO:0060193	positive regulation of lipase activity	-2.3	4.5	3.7	24156	73	370	5	1.4	0.6	283|335|344|728|3491	ANG|APOA1|APOC2|C5AR1|CCN1	-0.97	Input ID
GO-BP	19	GO:0019915	lipid storage	-2.3	4.5	3.7	24156	73	370	5	1.4	0.6	123|335|3685|29923|84649	PLIN2|APOA1|ITGAV|HILPDA|DGAT2	-0.97	Input ID
GO-BP	19	GO:0015893	drug transport	-2.3	2.8	3.3	24156	210	370	9	2.4	0.8	18|383|4363|5997|6510|6535|6580|10166|10991	ABAT|ARG1|ABCC1|RGS2|SLC1A5|SLC6A8|SLC22A1|SLC25A15|SLC38A3	-0.97	Input ID
GO-BP	19	GO:0051347	positive regulation of transferase activity	-2.3	1.9	3	24156	692	370	20	5.4	1.2	283|728|1164|1847|1848|2041|3491|3570|4739|5621|7852|8754|9314|9518|10576|22943|23531|27347|56892|100133941	ANG|C5AR1|CKS2|DUSP5|DUSP6|EPHA1|CCN1|IL6R|NEDD9|PRNP|CXCR4|ADAM9|KLF4|GDF15|CCT2|DKK1|MMD|STK39|TCIM|CD24	-0.97	Input ID
GO-BP	19	GO:0003018	vascular process in circulatory system	-2.3	3	3.3	24156	173	370	8	2.2	0.76	133|1373|3162|3383|3827|5345|5997|59342	ADM|CPS1|HMOX1|ICAM1|KNG1|SERPINF2|RGS2|SCPEP1	-0.97	Input ID
GO-BP	19	GO:0072503	cellular divalent inorganic cation homeostasis	-2.3	2.1	3	24156	507	370	16	4.3	1.1	133|302|491|728|1649|3685|3827|5621|6279|6280|6781|7852|9104|30001|55013|100133941	ADM|ANXA2|ATP2B2|C5AR1|DDIT3|ITGAV|KNG1|PRNP|S100A8|S100A9|STC1|CXCR4|RGN|ERO1A|MCUB|CD24	-0.96	Input ID
GO-BP	19	GO:0003012	muscle system process	-2.3	2.1	3	24156	462	370	15	4.1	1	18|226|2023|2539|2593|3162|3673|4851|5997|6535|6781|7852|8470|9314|28999	ABAT|ALDOA|ENO1|G6PD|GAMT|HMOX1|ITGA2|NOTCH1|RGS2|SLC6A8|STC1|CXCR4|SORBS2|KLF4|KLF15	-0.96	Input ID
GO-BP	19	GO:0050670	regulation of lymphocyte proliferation	-2.3	2.8	3.2	24156	211	370	9	2.4	0.8	383|1880|5621|7305|10457|11326|27242|84868|100133941	ARG1|GPR183|PRNP|TYROBP|GPNMB|VSIG4|TNFRSF21|HAVCR2|CD24	-0.96	Input ID
GO-BP	19	GO:0046683	response to organophosphorus	-2.3	3.3	3.4	24156	138	370	7	1.9	0.71	189|1373|2353|3725|3939|5313|6781	AGXT|CPS1|FOS|JUN|LDHA|PKLR|STC1	-0.96	Input ID
GO-BP	19	GO:0006073	cellular glucan metabolic process	-2.3	4.4	3.7	24156	74	370	5	1.4	0.6	2538|2998|3795|5502|27232	G6PC|GYS2|KHK|PPP1R1A|GNMT	-0.95	Input ID
GO-BP	19	GO:0045685	regulation of glial cell differentiation	-2.3	4.4	3.7	24156	74	370	5	1.4	0.6	4851|5270|7097|7852|27242	NOTCH1|SERPINE2|TLR2|CXCR4|TNFRSF21	-0.95	Input ID
GO-BP	19	GO:0044042	glucan metabolic process	-2.3	4.4	3.7	24156	74	370	5	1.4	0.6	2538|2998|3795|5502|27232	G6PC|GYS2|KHK|PPP1R1A|GNMT	-0.95	Input ID
GO-BP	19	GO:0050830	defense response to Gram-positive bacterium	-2.3	3.7	3.5	24156	105	370	6	1.6	0.66	728|4069|7097|84868|114770|653808	C5AR1|LYZ|TLR2|HAVCR2|PGLYRP2|ZG16	-0.95	Input ID
GO-BP	19	GO:0003181	atrioventricular valve morphogenesis	-2.2	8.2	4.4	24156	24	370	3	0.81	0.47	3491|4851|6659	CCN1|NOTCH1|SOX4	-0.95	Input ID
GO-BP	19	GO:0009110	vitamin biosynthetic process	-2.2	8.2	4.4	24156	24	370	3	0.81	0.47	1593|5360|9104	CYP27A1|PLTP|RGN	-0.95	Input ID
GO-BP	19	GO:1904376	negative regulation of protein localization to cell periphery	-2.2	8.2	4.4	24156	24	370	3	0.81	0.47	1601|23433|55022	DAB2|RHOQ|PID1	-0.95	Input ID
GO-BP	19	GO:0051004	regulation of lipoprotein lipase activity	-2.2	8.2	4.4	24156	24	370	3	0.81	0.47	335|344|345	APOA1|APOC2|APOC3	-0.95	Input ID
GO-BP	19	GO:0009068	aspartate family amino acid catabolic process	-2.2	8.2	4.4	24156	24	370	3	0.81	0.47	2806|4143|51268	GOT2|MAT1A|PIPOX	-0.95	Input ID
GO-BP	19	GO:2001026	regulation of endothelial cell chemotaxis	-2.2	8.2	4.4	24156	24	370	3	0.81	0.47	3273|4851|7114	HRG|NOTCH1|TMSB4X	-0.95	Input ID
GO-BP	19	GO:0006541	glutamine metabolic process	-2.2	8.2	4.4	24156	24	370	3	0.81	0.47	1373|7915|27165	CPS1|ALDH5A1|GLS2	-0.95	Input ID
GO-BP	19	GO:0001959	regulation of cytokine-mediated signaling pathway	-2.2	3	3.3	24156	175	370	8	2.2	0.76	335|383|3091|3263|4321|7128|7852|100133941	APOA1|ARG1|HIF1A|HPX|MMP12|TNFAIP3|CXCR4|CD24	-0.94	Input ID
GO-BP	19	GO:0045017	glycerolipid biosynthetic process	-2.2	2.6	3.2	24156	252	370	10	2.7	0.84	283|335|2822|5106|9104|10400|55224|79888|80168|84649	ANG|APOA1|GPLD1|PCK2|RGN|PEMT|ETNK2|LPCAT1|MOGAT2|DGAT2	-0.94	Input ID
GO-BP	19	GO:0006953	acute-phase response	-2.2	5.6	3.9	24156	47	370	4	1.1	0.54	3570|5345|6291|7036	IL6R|SERPINF2|SAA4|TFR2	-0.94	Input ID
GO-BP	19	GO:0032369	negative regulation of lipid transport	-2.2	5.6	3.9	24156	47	370	4	1.1	0.54	344|345|3685|8529	APOC2|APOC3|ITGAV|CYP4F2	-0.94	Input ID
GO-BP	19	GO:0035850	epithelial cell differentiation involved in kidney development	-2.2	5.6	3.9	24156	47	370	4	1.1	0.54	4318|4851|28999|100133941	MMP9|NOTCH1|KLF15|CD24	-0.94	Input ID
GO-BP	19	GO:0002833	positive regulation of response to biotic stimulus	-2.2	5.6	3.9	24156	47	370	4	1.1	0.54	383|3273|23643|84868	ARG1|HRG|LY96|HAVCR2	-0.94	Input ID
GO-BP	19	GO:0032944	regulation of mononuclear cell proliferation	-2.2	2.8	3.2	24156	213	370	9	2.4	0.8	383|1880|5621|7305|10457|11326|27242|84868|100133941	ARG1|GPR183|PRNP|TYROBP|GPNMB|VSIG4|TNFRSF21|HAVCR2|CD24	-0.94	Input ID
GO-BP	19	GO:0071356	cellular response to tumor necrosis factor	-2.2	2.5	3.1	24156	293	370	11	3	0.88	335|427|1687|3383|6364|6370|7114|7128|7538|27242|55022	APOA1|ASAH1|GSDME|ICAM1|CCL20|CCL25|TMSB4X|TNFAIP3|ZFP36|TNFRSF21|PID1	-0.94	Input ID
GO-BP	19	GO:0042136	neurotransmitter biosynthetic process	-2.2	3.7	3.5	24156	106	370	6	1.6	0.66	18|189|3383|9104|9314|51733	ABAT|AGXT|ICAM1|RGN|KLF4|UPB1	-0.94	Input ID
GO-BP	19	GO:0030072	peptide hormone secretion	-2.2	2.6	3.2	24156	253	370	10	2.7	0.84	18|2822|3091|5950|6513|6514|6567|6659|7036|55107	ABAT|GPLD1|HIF1A|RBP4|SLC2A1|SLC2A2|SLC16A2|SOX4|TFR2|ANO1	-0.93	Input ID
GO-BP	19	GO:0071559	response to transforming growth factor beta	-2.2	2.6	3.2	24156	253	370	10	2.7	0.84	335|383|1601|2353|3725|4015|8754|9518|25805|57530	APOA1|ARG1|DAB2|FOS|JUN|LOX|ADAM9|GDF15|BAMBI|CGN	-0.93	Input ID
GO-BP	19	GO:0072347	response to anesthetic	-2.2	4.4	3.6	24156	75	370	5	1.4	0.6	18|2155|2806|6529|7852	ABAT|F7|GOT2|SLC6A1|CXCR4	-0.93	Input ID
GO-BP	19	GO:0023061	signal release	-2.2	2.1	3	24156	467	370	15	4.1	1	18|133|2822|3091|5217|5538|5950|6513|6514|6567|6659|6696|7036|8564|55107	ABAT|ADM|GPLD1|HIF1A|PFN2|PPT1|RBP4|SLC2A1|SLC2A2|SLC16A2|SOX4|SPP1|TFR2|KMO|ANO1	-0.93	Input ID
GO-BP	19	GO:0071496	cellular response to external stimulus	-2.2	2.3	3.1	24156	336	370	12	3.2	0.92	467|2353|3162|3383|3673|3725|4316|6513|10991|55062|58528|81631	ATF3|FOS|HMOX1|ICAM1|ITGA2|JUN|MMP7|SLC2A1|SLC38A3|WIPI1|RRAGD|MAP1LC3B	-0.93	Input ID
GO-BP	19	GO:0050796	regulation of insulin secretion	-2.2	3	3.2	24156	177	370	8	2.2	0.76	18|2822|3091|5950|6513|6514|6659|55107	ABAT|GPLD1|HIF1A|RBP4|SLC2A1|SLC2A2|SOX4|ANO1	-0.92	Input ID
GO-BP	19	GO:0061614	pri-miRNA transcription by RNA polymerase II	-2.2	5.4	3.8	24156	48	370	4	1.1	0.54	2353|3091|3725|9314	FOS|HIF1A|JUN|KLF4	-0.91	Input ID
GO-BP	19	GO:0014015	positive regulation of gliogenesis	-2.2	4.3	3.6	24156	76	370	5	1.4	0.6	2119|4851|5270|7097|7852	ETV5|NOTCH1|SERPINE2|TLR2|CXCR4	-0.91	Input ID
GO-BP	19	GO:0090287	regulation of cellular response to growth factor stimulus	-2.2	2.4	3.1	24156	296	370	11	3	0.88	1601|3091|3273|3491|4015|4851|7498|22943|25805|148738|164656	DAB2|HIF1A|HRG|CCN1|LOX|NOTCH1|XDH|DKK1|BAMBI|HJV|TMPRSS6	-0.91	Input ID
GO-BP	19	GO:0006956	complement activation	-2.2	2.9	3.2	24156	178	370	8	2.2	0.76	714|728|729|732|1361|10747|10877|11326	C1QC|C5AR1|C6|C8B|CPB2|MASP2|CFHR4|VSIG4	-0.91	Input ID
GO-BP	19	GO:0022411	cellular component disassembly	-2.2	2	2.9	24156	562	370	17	4.6	1.1	665|714|960|1776|3091|3099|3818|4312|4316|4318|4321|5340|22943|54541|55062|81631|164656	BNIP3L|C1QC|CD44|DNASE1L3|HIF1A|HK2|KLKB1|MMP1|MMP7|MMP9|MMP12|PLG|DKK1|DDIT4|WIPI1|MAP1LC3B|TMPRSS6	-0.91	Input ID
GO-BP	19	GO:0002831	regulation of response to biotic stimulus	-2.2	3.2	3.3	24156	142	370	7	1.9	0.71	383|3273|4321|6372|7128|23643|84868	ARG1|HRG|MMP12|CXCL6|TNFAIP3|LY96|HAVCR2	-0.91	Input ID
GO-BP	19	GO:0002719	negative regulation of cytokine production involved in immune response	-2.2	7.8	4.3	24156	25	370	3	0.81	0.47	335|383|3162	APOA1|ARG1|HMOX1	-0.91	Input ID
GO-BP	19	GO:1905809	negative regulation of synapse organization	-2.2	7.8	4.3	24156	25	370	3	0.81	0.47	5621|7097|22943	PRNP|TLR2|DKK1	-0.91	Input ID
GO-BP	19	GO:0003071	renal system process involved in regulation of systemic arterial blood pressure	-2.2	7.8	4.3	24156	25	370	3	0.81	0.47	1579|5345|8529	CYP4A11|SERPINF2|CYP4F2	-0.91	Input ID
GO-BP	19	GO:0009299	mRNA transcription	-2.2	7.8	4.3	24156	25	370	3	0.81	0.47	728|1649|3091	C5AR1|DDIT3|HIF1A	-0.91	Input ID
GO-BP	19	GO:2001235	positive regulation of apoptotic signaling pathway	-2.2	2.9	3.2	24156	179	370	8	2.2	0.76	467|1075|1649|1687|4318|5329|6279|6280	ATF3|CTSC|DDIT3|GSDME|MMP9|PLAUR|S100A8|S100A9	-0.9	Input ID
GO-BP	19	GO:1904036	negative regulation of epithelial cell apoptotic process	-2.2	5.3	3.8	24156	49	370	4	1.1	0.54	3162|3383|5054|7128	HMOX1|ICAM1|SERPINE1|TNFAIP3	-0.89	Input ID
GO-BP	19	GO:0045933	positive regulation of muscle contraction	-2.2	5.3	3.8	24156	49	370	4	1.1	0.54	18|2023|3673|5997	ABAT|ENO1|ITGA2|RGS2	-0.89	Input ID
GO-BP	19	GO:0030336	negative regulation of cell migration	-2.2	2.3	3	24156	341	370	12	3.2	0.92	2041|3162|3273|3486|4851|5054|5217|6370|6781|9314|23603|58516	EPHA1|HMOX1|HRG|IGFBP3|NOTCH1|SERPINE1|PFN2|CCL25|STC1|KLF4|CORO1C|SINHCAF	-0.89	Input ID
GO-BP	19	GO:0033674	positive regulation of kinase activity	-2.2	1.9	2.9	24156	613	370	18	4.9	1.1	283|728|1164|1847|1848|2041|3491|3570|4739|5621|7852|8754|9518|22943|23531|27347|56892|100133941	ANG|C5AR1|CKS2|DUSP5|DUSP6|EPHA1|CCN1|IL6R|NEDD9|PRNP|CXCR4|ADAM9|GDF15|DKK1|MMD|STK39|TCIM|CD24	-0.88	Input ID
GO-BP	19	GO:0007612	learning	-2.2	3.2	3.3	24156	144	370	7	1.9	0.71	2353|3091|3725|5538|6529|7097|22943	FOS|HIF1A|JUN|PPT1|SLC6A1|TLR2|DKK1	-0.88	Input ID
GO-BP	19	GO:0071241	cellular response to inorganic substance	-2.2	2.7	3.1	24156	219	370	9	2.4	0.8	241|2203|2353|2822|3162|3725|4318|5621|7036	ALOX5AP|FBP1|FOS|GPLD1|HMOX1|JUN|MMP9|PRNP|TFR2	-0.88	Input ID
GO-BP	19	GO:0000422	autophagy of mitochondrion	-2.2	4.2	3.5	24156	78	370	5	1.4	0.6	665|3091|3099|55062|81631	BNIP3L|HIF1A|HK2|WIPI1|MAP1LC3B	-0.87	Input ID
GO-BP	19	GO:0032677	regulation of interleukin-8 production	-2.2	4.2	3.5	24156	78	370	5	1.4	0.6	1649|5054|7097|7114|9314	DDIT3|SERPINE1|TLR2|TMSB4X|KLF4	-0.87	Input ID
GO-BP	19	GO:0061726	mitochondrion disassembly	-2.2	4.2	3.5	24156	78	370	5	1.4	0.6	665|3091|3099|55062|81631	BNIP3L|HIF1A|HK2|WIPI1|MAP1LC3B	-0.87	Input ID
GO-BP	19	GO:0042246	tissue regeneration	-2.2	4.2	3.5	24156	78	370	5	1.4	0.6	4851|5315|5340|5738|7104	NOTCH1|PKM|PLG|PTGFRN|TM4SF4	-0.87	Input ID
GO-BP	19	GO:0051873	killing by host of symbiont cells	-2.1	7.5	4.2	24156	26	370	3	0.81	0.47	383|3273|6372	ARG1|HRG|CXCL6	-0.87	Input ID
GO-BP	19	GO:0043090	amino acid import	-2.1	7.5	4.2	24156	26	370	3	0.81	0.47	5997|6510|6529	RGS2|SLC1A5|SLC6A1	-0.87	Input ID
GO-BP	19	GO:1903959	regulation of anion transmembrane transport	-2.1	7.5	4.2	24156	26	370	3	0.81	0.47	5621|5997|27347	PRNP|RGS2|STK39	-0.87	Input ID
GO-BP	19	GO:1903010	regulation of bone development	-2.1	7.5	4.2	24156	26	370	3	0.81	0.47	4015|7305|9104	LOX|TYROBP|RGN	-0.87	Input ID
GO-BP	19	GO:0051852	disruption by host of symbiont cells	-2.1	7.5	4.2	24156	26	370	3	0.81	0.47	383|3273|6372	ARG1|HRG|CXCL6	-0.87	Input ID
GO-BP	19	GO:0003171	atrioventricular valve development	-2.1	7.5	4.2	24156	26	370	3	0.81	0.47	3491|4851|6659	CCN1|NOTCH1|SOX4	-0.87	Input ID
GO-BP	19	GO:0001961	positive regulation of cytokine-mediated signaling pathway	-2.1	5.2	3.7	24156	50	370	4	1.1	0.54	3091|3263|4321|7852	HIF1A|HPX|MMP12|CXCR4	-0.87	Input ID
GO-BP	19	GO:1901571	fatty acid derivative transport	-2.1	5.2	3.7	24156	50	370	4	1.1	0.54	1579|4363|8529|84647	CYP4A11|ABCC1|CYP4F2|PLA2G12B	-0.87	Input ID
GO-BP	19	GO:0002704	negative regulation of leukocyte mediated immunity	-2.1	5.2	3.7	24156	50	370	4	1.1	0.54	383|3162|5272|84868	ARG1|HMOX1|SERPINB9|HAVCR2	-0.87	Input ID
GO-BP	19	GO:0071715	icosanoid transport	-2.1	5.2	3.7	24156	50	370	4	1.1	0.54	1579|4363|8529|84647	CYP4A11|ABCC1|CYP4F2|PLA2G12B	-0.87	Input ID
GO-BP	19	GO:0120035	regulation of plasma membrane bounded cell projection organization	-2.1	1.8	2.8	24156	713	370	20	5.4	1.2	960|1808|3273|3383|3956|5217|5621|5997|6280|6696|7852|9314|22943|23316|23433|23603|29116|50807|54443|83715	CD44|DPYSL2|HRG|ICAM1|LGALS1|PFN2|PRNP|RGS2|S100A9|SPP1|CXCR4|KLF4|DKK1|CUX2|RHOQ|CORO1C|MYLIP|ASAP1|ANLN|ESPN	-0.86	Input ID
GO-BP	19	GO:0006814	sodium ion transport	-2.1	2.7	3.1	24156	221	370	9	2.4	0.8	483|5270|6535|6554|10050|10991|27347|65267|81539	ATP1B3|SERPINE2|SLC6A8|SLC10A1|SLC17A4|SLC38A3|STK39|WNK3|SLC38A1	-0.86	Input ID
GO-BP	19	GO:1903531	negative regulation of secretion by cell	-2.1	2.7	3.1	24156	221	370	9	2.4	0.8	18|335|1992|3162|4851|5552|7114|7128|27242	ABAT|APOA1|SERPINB1|HMOX1|NOTCH1|SRGN|TMSB4X|TNFAIP3|TNFRSF21	-0.86	Input ID
GO-BP	19	GO:0005976	polysaccharide metabolic process	-2.1	3.5	3.3	24156	111	370	6	1.6	0.66	2538|2998|3795|5502|27232|84002	G6PC|GYS2|KHK|PPP1R1A|GNMT|B3GNT5	-0.86	Input ID
GO-BP	19	GO:0010827	regulation of glucose transmembrane transport	-2.1	4.1	3.5	24156	79	370	5	1.4	0.6	3099|6513|23433|28999|55022	HK2|SLC2A1|RHOQ|KLF15|PID1	-0.86	Input ID
GO-BP	19	GO:0009267	cellular response to starvation	-2.1	3.1	3.2	24156	146	370	7	1.9	0.71	467|3725|6513|10991|55062|58528|81631	ATF3|JUN|SLC2A1|SLC38A3|WIPI1|RRAGD|MAP1LC3B	-0.86	Input ID
GO-BP	19	GO:0043534	blood vessel endothelial cell migration	-2.1	2.9	3.1	24156	183	370	8	2.2	0.76	335|2822|3091|3162|3273|4851|7114|9314	APOA1|GPLD1|HIF1A|HMOX1|HRG|NOTCH1|TMSB4X|KLF4	-0.86	Input ID
GO-BP	19	GO:0008217	regulation of blood pressure	-2.1	2.9	3.1	24156	183	370	8	2.2	0.76	18|133|1579|3162|5345|8529|27347|59342	ABAT|ADM|CYP4A11|HMOX1|SERPINF2|CYP4F2|STK39|SCPEP1	-0.86	Input ID
GO-BP	19	GO:0051271	negative regulation of cellular component movement	-2.1	2.2	2.9	24156	390	370	13	3.5	0.96	2041|3162|3273|3486|4851|5054|5217|6370|6781|9104|9314|23603|58516	EPHA1|HMOX1|HRG|IGFBP3|NOTCH1|SERPINE1|PFN2|CCL25|STC1|RGN|KLF4|CORO1C|SINHCAF	-0.85	Input ID
GO-BP	19	GO:0072507	divalent inorganic cation homeostasis	-2.1	2	2.9	24156	526	370	16	4.3	1.1	133|302|491|728|1649|3685|3827|5621|6279|6280|6781|7852|9104|30001|55013|100133941	ADM|ANXA2|ATP2B2|C5AR1|DDIT3|ITGAV|KNG1|PRNP|S100A8|S100A9|STC1|CXCR4|RGN|ERO1A|MCUB|CD24	-0.85	Input ID
GO-BP	19	GO:0006730	one-carbon metabolic process	-2.1	7.3	4.1	24156	27	370	3	0.81	0.47	4143|10841|27232	MAT1A|FTCD|GNMT	-0.83	Input ID
GO-BP	19	GO:1900120	regulation of receptor binding	-2.1	7.3	4.1	24156	27	370	3	0.81	0.47	302|4015|4318	ANXA2|LOX|MMP9	-0.83	Input ID
GO-BP	19	GO:0018126	protein hydroxylation	-2.1	7.3	4.1	24156	27	370	3	0.81	0.47	5352|30001|112399	PLOD2|ERO1A|EGLN3	-0.83	Input ID
GO-BP	19	GO:0060143	positive regulation of syncytium formation by plasma membrane fusion	-2.1	7.3	4.1	24156	27	370	3	0.81	0.47	7305|8754|9518	TYROBP|ADAM9|GDF15	-0.83	Input ID
GO-BP	19	GO:1905208	negative regulation of cardiocyte differentiation	-2.1	7.3	4.1	24156	27	370	3	0.81	0.47	2539|5997|22943	G6PD|RGS2|DKK1	-0.83	Input ID
GO-BP	19	GO:0051953	negative regulation of amine transport	-2.1	7.3	4.1	24156	27	370	3	0.81	0.47	18|5997|27347	ABAT|RGS2|STK39	-0.83	Input ID
GO-BP	19	GO:0034114	regulation of heterotypic cell-cell adhesion	-2.1	7.3	4.1	24156	27	370	3	0.81	0.47	335|960|9314	APOA1|CD44|KLF4	-0.83	Input ID
GO-BP	19	GO:0060419	heart growth	-2.1	3.5	3.3	24156	113	370	6	1.6	0.66	1848|2539|4851|5950|5997|8470	DUSP6|G6PD|NOTCH1|RBP4|RGS2|SORBS2	-0.83	Input ID
GO-BP	19	GO:0032411	positive regulation of transporter activity	-2.1	3.5	3.3	24156	113	370	6	1.6	0.66	483|5444|7114|9104|27347|65267	ATP1B3|PON1|TMSB4X|RGN|STK39|WNK3	-0.83	Input ID
GO-BP	19	GO:0001501	skeletal system development	-2.1	2	2.8	24156	529	370	16	4.3	1.1	302|960|1101|1462|2822|3091|3491|3950|4015|4318|5950|6659|6694|6781|7305|9104	ANXA2|CD44|CHAD|VCAN|GPLD1|HIF1A|CCN1|LECT2|LOX|MMP9|RBP4|SOX4|SPP2|STC1|TYROBP|RGN	-0.83	Input ID
GO-BP	19	GO:0031668	cellular response to extracellular stimulus	-2.1	2.5	3	24156	265	370	10	2.7	0.84	467|2353|3162|3383|3725|6513|10991|55062|58528|81631	ATF3|FOS|HMOX1|ICAM1|JUN|SLC2A1|SLC38A3|WIPI1|RRAGD|MAP1LC3B	-0.83	Input ID
GO-BP	19	GO:0050707	regulation of cytokine secretion	-2.1	2.6	3	24156	225	370	9	2.4	0.8	335|1992|4321|5552|7097|7114|7128|27242|84868	APOA1|SERPINB1|MMP12|SRGN|TLR2|TMSB4X|TNFAIP3|TNFRSF21|HAVCR2	-0.82	Input ID
GO-BP	19	GO:0031345	negative regulation of cell projection organization	-2.1	2.8	3.1	24156	186	370	8	2.2	0.76	3273|3956|5217|5621|6696|22943|29116|50807	HRG|LGALS1|PFN2|PRNP|SPP1|DKK1|MYLIP|ASAP1	-0.82	Input ID
GO-BP	19	GO:0048608	reproductive structure development	-2.1	2.1	2.9	24156	439	370	14	3.8	0.99	133|283|2705|3091|3383|3491|4851|5104|5270|5340|5950|6696|6781|55224	ADM|ANG|GJB1|HIF1A|ICAM1|CCN1|NOTCH1|SERPINA5|SERPINE2|PLG|RBP4|SPP1|STC1|ETNK2	-0.82	Input ID
GO-BP	19	GO:0043392	negative regulation of DNA binding	-2.1	5	3.6	24156	52	370	4	1.1	0.54	1649|3162|3725|7114	DDIT3|HMOX1|JUN|TMSB4X	-0.82	Input ID
GO-BP	19	GO:0048260	positive regulation of receptor-mediated endocytosis	-2.1	5	3.6	24156	52	370	4	1.1	0.54	302|1601|5054|5538	ANXA2|DAB2|SERPINE1|PPT1	-0.82	Input ID
GO-BP	19	GO:0051496	positive regulation of stress fiber assembly	-2.1	5	3.6	24156	52	370	4	1.1	0.54	335|2041|5217|5345	APOA1|EPHA1|PFN2|SERPINF2	-0.82	Input ID
GO-BP	19	GO:0032653	regulation of interleukin-10 production	-2.1	5	3.6	24156	52	370	4	1.1	0.54	2207|7097|7305|27242	FCER1G|TLR2|TYROBP|TNFRSF21	-0.82	Input ID
GO-BP	19	GO:0009620	response to fungus	-2.1	5	3.6	24156	52	370	4	1.1	0.54	383|3273|6279|6280	ARG1|HRG|S100A8|S100A9	-0.82	Input ID
GO-BP	19	GO:0031103	axon regeneration	-2.1	5	3.6	24156	52	370	4	1.1	0.54	335|3725|6696|9314	APOA1|JUN|SPP1|KLF4	-0.82	Input ID
GO-BP	19	GO:0030514	negative regulation of BMP signaling pathway	-2.1	5	3.6	24156	52	370	4	1.1	0.54	4851|22943|148738|164656	NOTCH1|DKK1|HJV|TMPRSS6	-0.82	Input ID
GO-BP	19	GO:1903510	mucopolysaccharide metabolic process	-2.1	3.4	3.3	24156	114	370	6	1.6	0.66	960|1462|3697|3698|3699|23670	CD44|VCAN|ITIH1|ITIH2|ITIH3|CEMIP2	-0.82	Input ID
GO-BP	19	GO:0043200	response to amino acid	-2.1	3.4	3.3	24156	114	370	6	1.6	0.66	383|1373|2155|3383|10400|58528	ARG1|CPS1|F7|ICAM1|PEMT|RRAGD	-0.82	Input ID
GO-BP	19	GO:0050868	negative regulation of T cell activation	-2.1	3.4	3.3	24156	114	370	6	1.6	0.66	383|5621|10457|11326|27242|84868	ARG1|PRNP|GPNMB|VSIG4|TNFRSF21|HAVCR2	-0.82	Input ID
GO-BP	19	GO:0051090	regulation of DNA-binding transcription factor activity	-2.1	2.1	2.8	24156	440	370	14	3.8	0.99	847|1649|2353|3162|3383|3725|5621|6279|6280|7097|7114|7128|9314|84868	CAT|DDIT3|FOS|HMOX1|ICAM1|JUN|PRNP|S100A8|S100A9|TLR2|TMSB4X|TNFAIP3|KLF4|HAVCR2	-0.81	Input ID
GO-BP	19	GO:0046209	nitric oxide metabolic process	-2.1	4	3.4	24156	82	370	5	1.4	0.6	1373|3383|7097|9104|9314	CPS1|ICAM1|TLR2|RGN|KLF4	-0.81	Input ID
GO-BP	19	GO:0048708	astrocyte differentiation	-2.1	4	3.4	24156	82	370	5	1.4	0.6	728|4851|5270|6279|25825	C5AR1|NOTCH1|SERPINE2|S100A8|BACE2	-0.81	Input ID
GO-BP	19	GO:0001894	tissue homeostasis	-2.1	2.6	3	24156	227	370	9	2.4	0.8	563|4069|4851|5950|6696|7107|7128|27347|79888	AZGP1|LYZ|NOTCH1|RBP4|SPP1|GPR137B|TNFAIP3|STK39|LPCAT1	-0.8	Input ID
GO-BP	19	GO:0061061	muscle structure development	-2.1	1.8	2.7	24156	676	370	19	5.1	1.1	133|467|1649|1839|2353|2539|3486|3956|4015|4851|5340|5738|5950|5997|8470|9518|22943|23764|93145	ADM|ATF3|DDIT3|HBEGF|FOS|G6PD|IGFBP3|LGALS1|LOX|NOTCH1|PLG|PTGFRN|RBP4|RGS2|SORBS2|GDF15|DKK1|MAFF|OLFM2	-0.8	Input ID
GO-BP	19	GO:0007369	gastrulation	-2.1	2.8	3.1	24156	188	370	8	2.2	0.76	335|1847|3673|3685|3912|4318|9314|22943	APOA1|DUSP5|ITGA2|ITGAV|LAMB1|MMP9|KLF4|DKK1	-0.8	Input ID
GO-BP	19	GO:0051818	disruption of cells of other organism involved in symbiotic interaction	-2.1	7	4	24156	28	370	3	0.81	0.47	383|3273|6372	ARG1|HRG|CXCL6	-0.8	Input ID
GO-BP	19	GO:0051883	killing of cells in other organism involved in symbiotic interaction	-2.1	7	4	24156	28	370	3	0.81	0.47	383|3273|6372	ARG1|HRG|CXCL6	-0.8	Input ID
GO-BP	19	GO:0085029	extracellular matrix assembly	-2.1	7	4	24156	28	370	3	0.81	0.47	4015|4851|5768	LOX|NOTCH1|QSOX1	-0.8	Input ID
GO-BP	19	GO:0008643	carbohydrate transport	-2.1	3	3.1	24156	151	370	7	1.9	0.71	3099|6513|6514|6515|23433|28999|55022	HK2|SLC2A1|SLC2A2|SLC2A3|RHOQ|KLF15|PID1	-0.8	Input ID
GO-BP	19	GO:0061458	reproductive system development	-2.1	2.1	2.8	24156	443	370	14	3.8	0.99	133|283|2705|3091|3383|3491|4851|5104|5270|5340|5950|6696|6781|55224	ADM|ANG|GJB1|HIF1A|ICAM1|CCN1|NOTCH1|SERPINA5|SERPINE2|PLG|RBP4|SPP1|STC1|ETNK2	-0.79	Input ID
GO-BP	19	GO:0046883	regulation of hormone secretion	-2.1	2.4	2.9	24156	269	370	10	2.7	0.84	18|2822|3091|5950|6513|6514|6659|6696|7036|55107	ABAT|GPLD1|HIF1A|RBP4|SLC2A1|SLC2A2|SOX4|SPP1|TFR2|ANO1	-0.79	Input ID
GO-BP	19	GO:0043462	regulation of ATPase activity	-2	3.9	3.3	24156	83	370	5	1.4	0.6	229|483|5217|7114|9104	ALDOB|ATP1B3|PFN2|TMSB4X|RGN	-0.79	Input ID
GO-BP	19	GO:0034637	cellular carbohydrate biosynthetic process	-2	3.9	3.3	24156	83	370	5	1.4	0.6	2203|2998|5106|6513|84002	FBP1|GYS2|PCK2|SLC2A1|B3GNT5	-0.79	Input ID
GO-BP	19	GO:0010633	negative regulation of epithelial cell migration	-2	3.4	3.2	24156	116	370	6	1.6	0.66	3273|4851|5217|6781|9314|23603	HRG|NOTCH1|PFN2|STC1|KLF4|CORO1C	-0.79	Input ID
GO-BP	19	GO:0048589	developmental growth	-2	1.8	2.7	24156	680	370	19	5.1	1.1	133|1808|1848|2538|2539|2593|4851|5315|5340|5738|5950|5997|6696|6781|7104|7852|8470|9518|55224	ADM|DPYSL2|DUSP6|G6PC|G6PD|GAMT|NOTCH1|PKM|PLG|PTGFRN|RBP4|RGS2|SPP1|STC1|TM4SF4|CXCR4|SORBS2|GDF15|ETNK2	-0.78	Input ID
GO-BP	19	GO:0051817	modification of morphology or physiology of other organism involved in symbiotic interaction	-2	3.3	3.2	24156	117	370	6	1.6	0.66	302|383|3273|3725|5272|6372	ANXA2|ARG1|HRG|JUN|SERPINB9|CXCL6	-0.77	Input ID
GO-BP	19	GO:0051181	cofactor transport	-2	4.8	3.5	24156	54	370	4	1.1	0.54	3263|3273|4363|5538	HPX|HRG|ABCC1|PPT1	-0.77	Input ID
GO-BP	19	GO:0034109	homotypic cell-cell adhesion	-2	3.9	3.3	24156	84	370	5	1.4	0.6	18|1192|3956|5270|5329	ABAT|CLIC1|LGALS1|SERPINE2|PLAUR	-0.77	Input ID
GO-BP	19	GO:0043154	negative regulation of cysteine-type endopeptidase activity involved in apoptotic process	-2	3.9	3.3	24156	84	370	5	1.4	0.6	960|4318|5272|5329|9314	CD44|MMP9|SERPINB9|PLAUR|KLF4	-0.77	Input ID
GO-BP	19	GO:0040013	negative regulation of locomotion	-2	2.1	2.8	24156	402	370	13	3.5	0.96	2041|3162|3273|3486|4851|5054|5217|6370|6781|9104|9314|23603|58516	EPHA1|HMOX1|HRG|IGFBP3|NOTCH1|SERPINE1|PFN2|CCL25|STC1|RGN|KLF4|CORO1C|SINHCAF	-0.76	Input ID
GO-BP	19	GO:0070723	response to cholesterol	-2	6.8	3.9	24156	29	370	3	0.81	0.47	1581|2155|2822	CYP7A1|F7|GPLD1	-0.76	Input ID
GO-BP	19	GO:0034377	plasma lipoprotein particle assembly	-2	6.8	3.9	24156	29	370	3	0.81	0.47	335|344|345	APOA1|APOC2|APOC3	-0.76	Input ID
GO-BP	19	GO:0015721	bile acid and bile salt transport	-2	6.8	3.9	24156	29	370	3	0.81	0.47	6554|10998|11309	SLC10A1|SLC27A5|SLCO2B1	-0.76	Input ID
GO-BP	19	GO:0060142	regulation of syncytium formation by plasma membrane fusion	-2	6.8	3.9	24156	29	370	3	0.81	0.47	7305|8754|9518	TYROBP|ADAM9|GDF15	-0.76	Input ID
GO-BP	19	GO:0045446	endothelial cell differentiation	-2	3.3	3.2	24156	118	370	6	1.6	0.66	3383|4851|5624|6781|7498|7852	ICAM1|NOTCH1|PROC|STC1|XDH|CXCR4	-0.76	Input ID
GO-BP	19	GO:0002224	toll-like receptor signaling pathway	-2	3	3.1	24156	154	370	7	1.9	0.71	6279|6280|7097|7128|23643|81035|84868	S100A8|S100A9|TLR2|TNFAIP3|LY96|COLEC12|HAVCR2	-0.76	Input ID
GO-BP	19	GO:0031330	negative regulation of cellular catabolic process	-2	2.4	2.9	24156	273	370	10	2.7	0.84	302|345|2165|2203|2822|3162|5768|7538|9104|54541	ANXA2|APOC3|F13B|FBP1|GPLD1|HMOX1|QSOX1|ZFP36|RGN|DDIT4	-0.76	Input ID
GO-BP	19	GO:0006836	neurotransmitter transport	-2	2.4	2.9	24156	273	370	10	2.7	0.84	18|2207|5217|5538|5997|6529|6535|6580|8564|81539	ABAT|FCER1G|PFN2|PPT1|RGS2|SLC6A1|SLC6A8|SLC22A1|KMO|SLC38A1	-0.76	Input ID
GO-BP	19	GO:0032956	regulation of actin cytoskeleton organization	-2	2.2	2.8	24156	359	370	12	3.2	0.92	335|390|2041|3273|3383|5066|5217|5345|7114|9168|23433|84952	APOA1|RND3|EPHA1|HRG|ICAM1|PAM|PFN2|SERPINF2|TMSB4X|TMSB10|RHOQ|CGNL1	-0.76	Input ID
GO-BP	19	GO:0070838	divalent metal ion transport	-2	2	2.7	24156	495	370	15	4.1	1	302|308|491|1649|2539|3383|3685|5621|6781|7852|9104|27075|30001|55013|65267	ANXA2|ANXA5|ATP2B2|DDIT3|G6PD|ICAM1|ITGAV|PRNP|STC1|CXCR4|RGN|TSPAN13|ERO1A|MCUB|WNK3	-0.75	Input ID
GO-BP	19	GO:0060420	regulation of heart growth	-2	3.8	3.3	24156	85	370	5	1.4	0.6	1848|2539|4851|5950|5997	DUSP6|G6PD|NOTCH1|RBP4|RGS2	-0.75	Input ID
GO-BP	19	GO:0001776	leukocyte homeostasis	-2	3.8	3.3	24156	85	370	5	1.4	0.6	1880|2207|3091|6372|7128	GPR183|FCER1G|HIF1A|CXCL6|TNFAIP3	-0.75	Input ID
GO-BP	19	GO:2001057	reactive nitrogen species metabolic process	-2	3.8	3.3	24156	85	370	5	1.4	0.6	1373|3383|7097|9104|9314	CPS1|ICAM1|TLR2|RGN|KLF4	-0.75	Input ID
GO-BP	19	GO:0032970	regulation of actin filament-based process	-2	2.1	2.8	24156	404	370	13	3.5	0.96	335|390|2041|3273|3383|5066|5217|5345|6781|7114|9168|23433|84952	APOA1|RND3|EPHA1|HRG|ICAM1|PAM|PFN2|SERPINF2|STC1|TMSB4X|TMSB10|RHOQ|CGNL1	-0.75	Input ID
GO-BP	19	GO:0032613	interleukin-10 production	-2	4.7	3.5	24156	55	370	4	1.1	0.54	2207|7097|7305|27242	FCER1G|TLR2|TYROBP|TNFRSF21	-0.75	Input ID
GO-BP	19	GO:0050994	regulation of lipid catabolic process	-2	4.7	3.5	24156	55	370	4	1.1	0.54	335|344|345|2822	APOA1|APOC2|APOC3|GPLD1	-0.75	Input ID
GO-BP	19	GO:0044273	sulfur compound catabolic process	-2	4.7	3.5	24156	55	370	4	1.1	0.54	189|1462|4143|7263	AGXT|VCAN|MAT1A|TST	-0.75	Input ID
KEGG	24	hsa04610	Complement and coagulation cascades	-20	17	18	24156	79	370	21	5.7	1.2	462|714|728|729|732|1361|2155|2158|2160|2161|2165|3818|3827|5054|5104|5329|5340|5345|5624|10747|11326	SERPINC1|C1QC|C5AR1|C6|C8B|CPB2|F7|F9|F11|F12|F13B|KLKB1|KNG1|SERPINE1|SERPINA5|PLAUR|PLG|SERPINF2|PROC|MASP2|VSIG4	-17	Input ID
KEGG	24	hsa01200	Carbon metabolism	-16	12	15	24156	114	370	21	5.7	1.2	189|226|229|847|1373|1962|2023|2026|2203|2539|2806|3099|4594|5214|5230|5313|5315|7086|9104|55753|132158	AGXT|ALDOA|ALDOB|CAT|CPS1|EHHADH|ENO1|ENO2|FBP1|G6PD|GOT2|HK2|MMUT|PFKP|PGK1|PKLR|PKM|TKT|RGN|OGDHL|GLYCTK	-13	Input ID
KEGG	24	hsa03320	PPAR signaling pathway	-13	14	13	24156	72	370	15	4.1	1	123|335|345|1581|1593|1962|3158|4312|4973|5106|5360|6319|8309|10998|11001	PLIN2|APOA1|APOC3|CYP7A1|CYP27A1|EHHADH|HMGCS2|MMP1|OLR1|PCK2|PLTP|SCD|ACOX2|SLC27A5|SLC27A2	-9.9	Input ID
KEGG	24	hsa01230	Biosynthesis of amino acids	-12	13	13	24156	75	370	15	4.1	1	226|229|383|586|1373|2023|2026|2806|4143|5214|5230|5313|5315|6898|7086	ALDOA|ALDOB|ARG1|BCAT1|CPS1|ENO1|ENO2|GOT2|MAT1A|PFKP|PGK1|PKLR|PKM|TAT|TKT	-9.7	Input ID
KEGG	24	hsa00010	Glycolysis / Gluconeogenesis	-12	14	13	24156	67	370	14	3.8	0.99	124|226|229|2023|2026|2203|2538|3099|3939|5106|5214|5230|5313|5315	ADH1A|ALDOA|ALDOB|ENO1|ENO2|FBP1|G6PC|HK2|LDHA|PCK2|PFKP|PGK1|PKLR|PKM	-9.3	Input ID
KEGG	24	hsa04066	HIF-1 signaling pathway	-8.3	8.4	9.3	24156	101	370	13	3.5	0.96	226|2023|2026|3091|3099|3162|3570|3939|5054|5209|5230|6513|112399	ALDOA|ENO1|ENO2|HIF1A|HK2|HMOX1|IL6R|LDHA|SERPINE1|PFKFB3|PGK1|SLC2A1|EGLN3	-6.2	Input ID
KEGG	24	hsa00650	Butanoate metabolism	-8.2	19	12	24156	28	370	8	2.2	0.76	18|622|1962|3158|7915|54988|123876|348158	ABAT|BDH1|EHHADH|HMGCS2|ALDH5A1|ACSM5|ACSM2A|ACSM2B	-6.1	Input ID
KEGG	24	hsa00030	Pentose phosphate pathway	-7.9	17	11	24156	30	370	8	2.2	0.76	226|229|2203|2539|5214|7086|9104|132158	ALDOA|ALDOB|FBP1|G6PD|PFKP|TKT|RGN|GLYCTK	-5.9	Input ID
KEGG	24	hsa00051	Fructose and mannose metabolism	-7.6	16	11	24156	33	370	8	2.2	0.76	226|229|2203|3099|3795|5209|5210|5214	ALDOA|ALDOB|FBP1|HK2|KHK|PFKFB3|PFKFB4|PFKP	-5.5	Input ID
KEGG	24	hsa05230	Central carbon metabolism in cancer	-7.3	10	9.1	24156	65	370	10	2.7	0.84	2539|3091|3099|3939|5214|5315|6510|6513|6514|27165	G6PD|HIF1A|HK2|LDHA|PFKP|PKM|SLC1A5|SLC2A1|SLC2A2|GLS2	-5.3	Input ID
KEGG	24	hsa00260	Glycine, serine and threonine metabolism	-6.9	13	9.5	24156	40	370	8	2.2	0.76	189|635|1610|2593|27232|29958|51268|132158	AGXT|BHMT|DAO|GAMT|GNMT|DMGDH|PIPOX|GLYCTK	-4.9	Input ID
KEGG	24	hsa04976	Bile secretion	-5.9	8.3	7.7	24156	71	370	9	2.4	0.8	483|1581|2052|5244|6513|6554|6580|10864|10998	ATP1B3|CYP7A1|EPHX1|ABCB4|SLC2A1|SLC10A1|SLC22A1|SLC22A7|SLC27A5	-4	Input ID
KEGG	24	hsa04657	IL-17 signaling pathway	-5.8	7	7.3	24156	93	370	10	2.7	0.84	2353|3725|4312|4318|6279|6280|6364|6372|6374|7128	FOS|JUN|MMP1|MMP9|S100A8|S100A9|CCL20|CXCL6|CXCL5|TNFAIP3	-3.9	Input ID
KEGG	24	hsa00120	Primary bile acid biosynthesis	-5.4	19	9.4	24156	17	370	5	1.4	0.6	1581|1593|6718|8309|10998	CYP7A1|CYP27A1|AKR1D1|ACOX2|SLC27A5	-3.5	Input ID
KEGG	24	hsa04146	Peroxisome	-5.3	7.1	6.9	24156	83	370	9	2.4	0.8	189|847|1610|1962|5264|7498|8309|11001|51268	AGXT|CAT|DAO|EHHADH|PHYH|XDH|ACOX2|SLC27A2|PIPOX	-3.5	Input ID
KEGG	24	hsa00270	Cysteine and methionine metabolism	-5.3	10	7.7	24156	45	370	7	1.9	0.71	586|635|2806|3939|4143|6898|7263	BCAT1|BHMT|GOT2|LDHA|MAT1A|TAT|TST	-3.5	Input ID
KEGG	24	hsa00770	Pantothenate and CoA biosynthesis	-5.2	18	9.1	24156	18	370	5	1.4	0.6	586|1807|8875|51733|53354	BCAT1|DPYS|VNN2|UPB1|PANK1	-3.4	Input ID
KEGG	24	hsa00250	Alanine, aspartate and glutamate metabolism	-4.9	11	7.5	24156	35	370	6	1.6	0.66	18|189|1373|2806|7915|27165	ABAT|AGXT|CPS1|GOT2|ALDH5A1|GLS2	-3.1	Input ID
KEGG	24	hsa04931	Insulin resistance	-4.4	5.5	5.8	24156	107	370	9	2.4	0.8	2538|2998|5106|6513|6514|10998|11000|11001|51085	G6PC|GYS2|PCK2|SLC2A1|SLC2A2|SLC27A5|SLC27A3|SLC27A2|MLXIPL	-2.7	Input ID
KEGG	24	hsa00830	Retinol metabolism	-4.2	7	6.1	24156	65	370	7	1.9	0.71	124|1548|1551|1559|1577|1579|8608	ADH1A|CYP2A6|CYP3A7|CYP2C9|CYP3A5|CYP4A11|RDH16	-2.6	Input ID
KEGG	24	hsa05323	Rheumatoid arthritis	-4.1	5.8	5.7	24156	90	370	8	2.2	0.76	2353|3383|3725|4312|6364|6372|6374|7097	FOS|ICAM1|JUN|MMP1|CCL20|CXCL6|CXCL5|TLR2	-2.5	Input ID
KEGG	24	hsa00280	Valine, leucine and isoleucine degradation	-4.1	8.2	6.2	24156	48	370	6	1.6	0.66	18|36|586|1962|3158|4594	ABAT|ACADSB|BCAT1|EHHADH|HMGCS2|MMUT	-2.4	Input ID
KEGG	24	hsa05020	Prion diseases	-3.7	9.3	6.1	24156	35	370	5	1.4	0.6	714|729|732|4851|5621	C1QC|C6|C8B|NOTCH1|PRNP	-2.2	Input ID
KEGG	24	hsa00350	Tyrosine metabolism	-3.7	9.3	6.1	24156	35	370	5	1.4	0.6	124|2806|3081|3242|6898	ADH1A|GOT2|HGD|HPD|TAT	-2.2	Input ID
KEGG	24	hsa04922	Glucagon signaling pathway	-3.7	5.1	5.2	24156	103	370	8	2.2	0.76	2203|2538|2998|3939|5106|5315|6513|6514	FBP1|G6PC|GYS2|LDHA|PCK2|PKM|SLC2A1|SLC2A2	-2.2	Input ID
KEGG	24	hsa00220	Arginine biosynthesis	-3.6	12	6.5	24156	21	370	4	1.1	0.54	383|1373|2806|27165	ARG1|CPS1|GOT2|GLS2	-2	Input ID
KEGG	24	hsa00620	Pyruvate metabolism	-3.5	8.4	5.7	24156	39	370	5	1.4	0.6	3029|3939|5106|5313|5315	HAGH|LDHA|PCK2|PKLR|PKM	-2	Input ID
KEGG	24	hsa00380	Tryptophan metabolism	-3.5	8.2	5.7	24156	40	370	5	1.4	0.6	847|1962|8564|23498|55753	CAT|EHHADH|KMO|HAAO|OGDHL	-1.9	Input ID
KEGG	24	hsa04964	Proximal tubule bicarbonate reclamation	-3.4	11	6.2	24156	23	370	4	1.1	0.54	483|5106|10991|27165	ATP1B3|PCK2|SLC38A3|GLS2	-1.9	Input ID
KEGG	24	hsa04975	Fat digestion and absorption	-3.4	8	5.6	24156	41	370	5	1.4	0.6	335|2806|80168|84647|84649	APOA1|GOT2|MOGAT2|PLA2G12B|DGAT2	-1.9	Input ID
KEGG	24	hsa04152	AMPK signaling pathway	-3.3	4.4	4.6	24156	120	370	8	2.2	0.76	2203|2538|2998|5106|5209|5210|5214|6319	FBP1|G6PC|GYS2|PCK2|PFKFB3|PFKFB4|PFKP|SCD	-1.8	Input ID
KEGG	24	hsa00983	Drug metabolism - other enzymes	-3.2	7.1	5.2	24156	46	370	5	1.4	0.6	1548|1807|7498|8824|51733	CYP2A6|DPYS|XDH|CES2|UPB1	-1.7	Input ID
KEGG	24	hsa00630	Glyoxylate and dicarboxylate metabolism	-3.1	9.3	5.5	24156	28	370	4	1.1	0.54	189|847|4594|132158	AGXT|CAT|MMUT|GLYCTK	-1.6	Input ID
KEGG	24	hsa05133	Pertussis	-3	5.2	4.5	24156	76	370	6	1.6	0.66	714|2353|3725|6372|6374|23643	C1QC|FOS|JUN|CXCL6|CXCL5|LY96	-1.5	Input ID
KEGG	24	hsa00410	beta-Alanine metabolism	-2.9	8.4	5.2	24156	31	370	4	1.1	0.54	18|1807|1962|51733	ABAT|DPYS|EHHADH|UPB1	-1.5	Input ID
KEGG	24	hsa04668	TNF signaling pathway	-2.9	4.2	4.2	24156	108	370	7	1.9	0.71	2353|3383|3725|4318|6364|6374|7128	FOS|ICAM1|JUN|MMP9|CCL20|CXCL5|TNFAIP3	-1.4	Input ID
KEGG	24	hsa00640	Propanoate metabolism	-2.9	8.2	5.1	24156	32	370	4	1.1	0.54	18|1962|3939|4594	ABAT|EHHADH|LDHA|MMUT	-1.4	Input ID
KEGG	24	hsa05204	Chemical carcinogenesis	-2.8	4.8	4.3	24156	82	370	6	1.6	0.66	124|1548|1551|1559|1577|2052	ADH1A|CYP2A6|CYP3A7|CYP2C9|CYP3A5|EPHX1	-1.4	Input ID
KEGG	24	hsa04512	ECM-receptor interaction	-2.8	4.8	4.3	24156	82	370	6	1.6	0.66	960|1101|3673|3685|3912|6696	CD44|CHAD|ITGA2|ITGAV|LAMB1|SPP1	-1.4	Input ID
KEGG	24	hsa05150	Staphylococcus aureus infection	-2.8	5.8	4.5	24156	56	370	5	1.4	0.6	714|728|3383|5340|10747	C1QC|C5AR1|ICAM1|PLG|MASP2	-1.4	Input ID
KEGG	24	hsa00140	Steroid hormone biosynthesis	-2.7	5.6	4.4	24156	58	370	5	1.4	0.6	1551|1577|1581|6718|7923	CYP3A7|CYP3A5|CYP7A1|AKR1D1|HSD17B8	-1.3	Input ID
KEGG	24	hsa00360	Phenylalanine metabolism	-2.7	12	5.4	24156	17	370	3	0.81	0.47	2806|3242|6898	GOT2|HPD|TAT	-1.3	Input ID
KEGG	24	hsa04919	Thyroid hormone signaling pathway	-2.7	3.9	4	24156	116	370	7	1.9	0.71	483|3091|3685|4851|5214|6513|6567	ATP1B3|HIF1A|ITGAV|NOTCH1|PFKP|SLC2A1|SLC16A2	-1.3	Input ID
KEGG	24	hsa00590	Arachidonic acid metabolism	-2.6	5.3	4.2	24156	62	370	5	1.4	0.6	1559|1579|4051|8529|84647	CYP2C9|CYP4A11|CYP4F3|CYP4F2|PLA2G12B	-1.2	Input ID
KEGG	24	hsa05146	Amoebiasis	-2.4	4.1	3.8	24156	96	370	6	1.6	0.66	383|732|1992|3912|5272|7097	ARG1|C8B|SERPINB1|LAMB1|SERPINB9|TLR2	-1.1	Input ID
KEGG	24	hsa00982	Drug metabolism - cytochrome P450	-2.4	4.7	3.8	24156	70	370	5	1.4	0.6	124|1548|1559|1577|2329	ADH1A|CYP2A6|CYP2C9|CYP3A5|FMO4	-1	Input ID
KEGG	24	hsa04973	Carbohydrate digestion and absorption	-2.3	5.9	4.1	24156	44	370	4	1.1	0.54	483|2538|3099|6514	ATP1B3|G6PC|HK2|SLC2A2	-1	Input ID
KEGG	24	hsa00071	Fatty acid degradation	-2.3	5.9	4.1	24156	44	370	4	1.1	0.54	36|124|1579|1962	ACADSB|ADH1A|CYP4A11|EHHADH	-1	Input ID
KEGG	24	hsa04930	Type II diabetes mellitus	-2.3	5.7	4	24156	46	370	4	1.1	0.54	3099|5313|5315|6514	HK2|PKLR|PKM|SLC2A2	-0.97	Input ID
KEGG	24	hsa04910	Insulin signaling pathway	-2.3	3.3	3.4	24156	138	370	7	1.9	0.71	2203|2538|2998|3099|5106|5313|23433	FBP1|G6PC|GYS2|HK2|PCK2|PKLR|RHOQ	-0.96	Input ID
KEGG	24	hsa00980	Metabolism of xenobiotics by cytochrome P450	-2.3	4.4	3.7	24156	74	370	5	1.4	0.6	124|1548|1559|1577|2052	ADH1A|CYP2A6|CYP2C9|CYP3A5|EPHX1	-0.95	Input ID
KEGG	24	hsa01212	Fatty acid metabolism	-2.2	5.4	3.8	24156	48	370	4	1.1	0.54	36|1962|5538|6319	ACADSB|EHHADH|PPT1|SCD	-0.91	Input ID
KEGG	24	hsa04151	PI3K-Akt signaling pathway	-2.2	2.3	3	24156	342	370	12	3.2	0.92	1101|2538|2998|3570|3673|3685|3912|5106|6696|7097|9180|54541	CHAD|G6PC|GYS2|IL6R|ITGA2|ITGAV|LAMB1|PCK2|SPP1|TLR2|OSMR|DDIT4	-0.88	Input ID
KEGG	24	hsa00330	Arginine and proline metabolism	-2.1	5.2	3.7	24156	50	370	4	1.1	0.54	383|1610|2593|2806	ARG1|DAO|GAMT|GOT2	-0.87	Input ID
Reactome	6	R-HSA-109582	Hemostasis	-12	4	9.4	24156	622	370	38	10	1.6	1|226|302|308|335|462|483|491|960|2155|2158|2160|2161|2165|2207|3273|3673|3685|3699|3818|3827|4312|4973|5054|5104|5267|5270|5329|5340|5345|5552|5624|5768|6694|7114|9056|10184|23764	A1BG|ALDOA|ANXA2|ANXA5|APOA1|SERPINC1|ATP1B3|ATP2B2|CD44|F7|F9|F11|F12|F13B|FCER1G|HRG|ITGA2|ITGAV|ITIH3|KLKB1|KNG1|MMP1|OLR1|SERPINE1|SERPINA5|SERPINA4|SERPINE2|PLAUR|PLG|SERPINF2|SRGN|PROC|QSOX1|SPP2|TMSB4X|SLC7A7|LHFPL2|MAFF	-9.7	Input ID
Reactome	6	R-HSA-381426	IGF transport	-12	9.4	12	24156	125	370	18	4.9	1.1	335|462|1462|3483|3486|3491|3698|3827|3912|3956|4312|5340|5624|5768|6694|6696|51156|51280	APOA1|SERPINC1|VCAN|IGFALS|IGFBP3|CCN1|ITIH2|KNG1|LAMB1|LGALS1|MMP1|PLG|PROC|QSOX1|SPP2|SPP1|SERPINA10|GOLM1	-9.5	Input ID
Reactome	6	R-HSA-70326	Glucose metabolism	-11	11	12	24156	91	370	15	4.1	1	226|229|2023|2026|2203|2538|2806|3099|5106|5209|5210|5214|5230|5313|5315	ALDOA|ALDOB|ENO1|ENO2|FBP1|G6PC|GOT2|HK2|PCK2|PFKFB3|PFKFB4|PFKP|PGK1|PKLR|PKM	-8.7	Input ID
Reactome	6	R-HSA-140877	Formation of Fibrin Clot	-11	18	14	24156	39	370	11	3	0.88	462|2155|2158|2160|2161|2165|3818|3827|5104|5270|5624	SERPINC1|F7|F9|F11|F12|F13B|KLKB1|KNG1|SERPINA5|SERPINE2|PROC	-8.6	Input ID
Reactome	6	R-HSA-6798695	Neutrophil degranulation	-11	4.2	8.9	24156	480	370	31	8.4	1.4	1|226|302|383|427|728|847|960|1075|1476|1992|2207|3685|4069|4318|4973|5315|5329|5768|6279|6280|6282|6515|7097|7276|7305|10576|11001|11031|25797|79888	A1BG|ALDOA|ANXA2|ARG1|ASAH1|C5AR1|CAT|CD44|CTSC|CSTB|SERPINB1|FCER1G|ITGAV|LYZ|MMP9|OLR1|PKM|PLAUR|QSOX1|S100A8|S100A9|S100A11|SLC2A3|TLR2|TTR|TYROBP|CCT2|SLC27A2|RAB31|QPCT|LPCAT1	-8.4	Input ID
Reactome	6	R-HSA-556833	Metabolism of lipids	-11	3.4	8.4	24156	739	370	39	11	1.6	123|241|335|427|622|866|1559|1579|1581|1593|1962|3158|4051|4363|4594|5244|5264|5444|5446|5538|6319|6554|6718|7108|7923|8309|8529|10400|10998|11000|11001|27242|29923|55224|79887|79888|80168|84649|345275	PLIN2|ALOX5AP|APOA1|ASAH1|BDH1|SERPINA6|CYP2C9|CYP4A11|CYP7A1|CYP27A1|EHHADH|HMGCS2|CYP4F3|ABCC1|MMUT|ABCB4|PHYH|PON1|PON3|PPT1|SCD|SLC10A1|AKR1D1|TM7SF2|HSD17B8|ACOX2|CYP4F2|PEMT|SLC27A5|SLC27A3|SLC27A2|TNFRSF21|HILPDA|ETNK2|PLBD1|LPCAT1|MOGAT2|DGAT2|HSD17B13	-8.4	Input ID
Reactome	6	R-HSA-140837	Intrinsic Pathway of Fibrin Clot Formation	-11	26	15	24156	23	370	9	2.4	0.8	462|2158|2160|2161|3818|3827|5104|5270|5624	SERPINC1|F9|F11|F12|KLKB1|KNG1|SERPINA5|SERPINE2|PROC	-8.3	Input ID
Reactome	6	R-HSA-71387	Metabolism of carbohydrates	-10	5.3	9.3	24156	295	370	24	6.5	1.3	226|229|960|1462|2023|2026|2203|2538|2539|2806|2998|3099|3795|5106|5209|5210|5214|5230|5313|5315|6513|7086|51084|132158	ALDOA|ALDOB|CD44|VCAN|ENO1|ENO2|FBP1|G6PC|G6PD|GOT2|GYS2|HK2|KHK|PCK2|PFKFB3|PFKFB4|PFKP|PGK1|PKLR|PKM|SLC2A1|TKT|CRYL1|GLYCTK	-8.2	Input ID
Reactome	6	R-HSA-211945	Phase I - Functionalization of compounds	-10	9.2	11	24156	106	370	15	4.1	1	124|670|1548|1549|1551|1559|1577|1579|1581|1593|2052|4051|8529|8824|285440	ADH1A|BPHL|CYP2A6|CYP2A7|CYP3A7|CYP2C9|CYP3A5|CYP4A11|CYP7A1|CYP27A1|EPHX1|CYP4F3|CYP4F2|CES2|CYP4V2	-7.9	Input ID
Reactome	6	R-HSA-8957275	Post-translational protein phosphorylation	-10	9.1	10	24156	108	370	15	4.1	1	335|462|1462|3486|3491|3698|3827|3912|3956|5624|5768|6694|6696|51156|51280	APOA1|SERPINC1|VCAN|IGFBP3|CCN1|ITIH2|KNG1|LAMB1|LGALS1|PROC|QSOX1|SPP2|SPP1|SERPINA10|GOLM1	-7.7	Input ID
Reactome	6	R-HSA-114608	Platelet degranulation	-9.8	8.1	10	24156	129	370	16	4.3	1.1	1|226|308|335|3273|3699|3827|5054|5267|5340|5345|5552|5768|6694|7114|10184	A1BG|ALDOA|ANXA5|APOA1|HRG|ITIH3|KNG1|SERPINE1|SERPINA4|PLG|SERPINF2|SRGN|QSOX1|SPP2|TMSB4X|LHFPL2	-7.6	Input ID
Reactome	6	R-HSA-75205	Dissolution of Fibrin Clot	-9.5	35	15	24156	13	370	7	1.9	0.71	302|3273|5054|5270|5329|5340|5345	ANXA2|HRG|SERPINE1|SERPINE2|PLAUR|PLG|SERPINF2	-7.4	Input ID
Reactome	6	R-HSA-70263	Gluconeogenesis	-8.8	17	12	24156	34	370	9	2.4	0.8	226|229|2023|2026|2203|2538|2806|5106|5230	ALDOA|ALDOB|ENO1|ENO2|FBP1|G6PC|GOT2|PCK2|PGK1	-6.7	Input ID
Reactome	6	R-HSA-211859	Biological oxidations	-8.8	5.6	8.6	24156	222	370	19	5.1	1.1	124|670|1548|1549|1551|1559|1577|1579|1581|1593|2052|4051|4143|8529|8824|54988|123876|285440|348158	ADH1A|BPHL|CYP2A6|CYP2A7|CYP3A7|CYP2C9|CYP3A5|CYP4A11|CYP7A1|CYP27A1|EPHX1|CYP4F3|MAT1A|CYP4F2|CES2|ACSM5|ACSM2A|CYP4V2|ACSM2B	-6.7	Input ID
Reactome	6	R-HSA-8978868	Fatty acid metabolism	-8.7	6.3	8.8	24156	177	370	17	4.6	1.1	241|1559|1579|1962|4051|4363|4594|5264|5444|5446|5538|6319|7923|8309|8529|11000|11001	ALOX5AP|CYP2C9|CYP4A11|EHHADH|CYP4F3|ABCC1|MMUT|PHYH|PON1|PON3|PPT1|SCD|HSD17B8|ACOX2|CYP4F2|SLC27A3|SLC27A2	-6.6	Input ID
Reactome	6	R-HSA-71291	Metabolism of amino acids and derivatives	-8.4	4.2	7.8	24156	374	370	24	6.5	1.3	36|189|383|586|635|1373|1610|2593|2806|3081|3242|4143|6535|6898|7263|8564|10166|10841|23498|27165|27232|29958|51268|55526	ACADSB|AGXT|ARG1|BCAT1|BHMT|CPS1|DAO|GAMT|GOT2|HGD|HPD|MAT1A|SLC6A8|TAT|TST|KMO|SLC25A15|FTCD|HAAO|GLS2|GNMT|DMGDH|PIPOX|DHTKD1	-6.3	Input ID
Reactome	6	R-HSA-211897	Cytochrome P450 - arranged by substrate type	-8.3	11	10	24156	66	370	11	3	0.88	1548|1549|1551|1559|1577|1579|1581|1593|4051|8529|285440	CYP2A6|CYP2A7|CYP3A7|CYP2C9|CYP3A5|CYP4A11|CYP7A1|CYP27A1|CYP4F3|CYP4F2|CYP4V2	-6.3	Input ID
Reactome	6	R-HSA-70171	Glycolysis	-8	10	9.6	24156	71	370	11	3	0.88	226|229|2023|2026|3099|5209|5210|5214|5230|5313|5315	ALDOA|ALDOB|ENO1|ENO2|HK2|PFKFB3|PFKFB4|PFKP|PGK1|PKLR|PKM	-5.9	Input ID
Reactome	6	R-HSA-1474244	Extracellular matrix organization	-6.6	4.1	6.8	24156	301	370	19	5.1	1.1	960|1462|3383|3673|3685|3818|3912|4015|4312|4316|4318|4321|5054|5340|5352|6696|7276|8754|164656	CD44|VCAN|ICAM1|ITGA2|ITGAV|KLKB1|LAMB1|LOX|MMP1|MMP7|MMP9|MMP12|SERPINE1|PLG|PLOD2|SPP1|TTR|ADAM9|TMPRSS6	-4.7	Input ID
Reactome	6	R-HSA-76002	Platelet activation, signaling and aggregation	-6.1	4.2	6.5	24156	263	370	17	4.6	1.1	1|226|308|335|2207|3273|3699|3827|5054|5267|5340|5345|5552|5768|6694|7114|10184	A1BG|ALDOA|ANXA5|APOA1|FCER1G|HRG|ITIH3|KNG1|SERPINE1|SERPINA4|PLG|SERPINF2|SRGN|QSOX1|SPP2|TMSB4X|LHFPL2	-4.3	Input ID
Reactome	6	R-HSA-193368	Synthesis of bile acids and bile salts via 7alpha-hydroxycholesterol	-5.9	16	9.4	24156	24	370	6	1.6	0.66	1581|1593|6718|8309|10998|11001	CYP7A1|CYP27A1|AKR1D1|ACOX2|SLC27A5|SLC27A2	-4	Input ID
Reactome	6	R-HSA-166658	Complement cascade	-5.6	9	7.6	24156	58	370	8	2.2	0.76	714|728|729|732|1361|10747|10877|10878	C1QC|C5AR1|C6|C8B|CPB2|MASP2|CFHR4|CFHR3	-3.7	Input ID
Reactome	6	R-HSA-2142753	Arachidonic acid metabolism	-5.5	8.9	7.5	24156	59	370	8	2.2	0.76	241|1559|1579|4051|4363|5444|5446|8529	ALOX5AP|CYP2C9|CYP4A11|CYP4F3|ABCC1|PON1|PON3|CYP4F2	-3.7	Input ID
Reactome	6	R-HSA-194068	Bile acid and bile salt metabolism	-5.4	11	7.9	24156	43	370	7	1.9	0.71	1581|1593|6554|6718|8309|10998|11001	CYP7A1|CYP27A1|SLC10A1|AKR1D1|ACOX2|SLC27A5|SLC27A2	-3.6	Input ID
Reactome	6	R-HSA-9033241	Peroxisomal protein import	-5.3	8.3	7.2	24156	63	370	8	2.2	0.76	189|847|1610|1962|5264|8309|11001|51268	AGXT|CAT|DAO|EHHADH|PHYH|ACOX2|SLC27A2|PIPOX	-3.5	Input ID
Reactome	6	R-HSA-159763	Transport of gamma-carboxylated protein precursors from the endoplasmic reticulum to the Golgi appar	-5.2	29	10	24156	9	370	4	1.1	0.54	2155|2158|5624|8858	F7|F9|PROC|PROZ	-3.4	Input ID
Reactome	6	R-HSA-977606	Regulation of Complement cascade	-5.2	9.7	7.5	24156	47	370	7	1.9	0.71	714|728|729|732|1361|10877|10878	C1QC|C5AR1|C6|C8B|CPB2|CFHR4|CFHR3	-3.4	Input ID
Reactome	6	R-HSA-382551	Transport of small molecules	-5.1	2.5	5.2	24156	728	370	28	7.6	1.4	335|344|345|483|491|563|3162|4363|5244|5360|6510|6513|6514|6515|6529|6567|6580|7036|9056|10864|10991|11309|28962|29116|55013|55107|65267|81539	APOA1|APOC2|APOC3|ATP1B3|ATP2B2|AZGP1|HMOX1|ABCC1|ABCB4|PLTP|SLC1A5|SLC2A1|SLC2A2|SLC2A3|SLC6A1|SLC16A2|SLC22A1|TFR2|SLC7A7|SLC22A7|SLC38A3|SLCO2B1|OSTM1|MYLIP|MCUB|ANO1|WNK3|SLC38A1	-3.3	Input ID
Reactome	6	R-HSA-159782	Removal of aminoterminal propeptides from gamma-carboxylated proteins	-5	26	9.9	24156	10	370	4	1.1	0.54	2155|2158|5624|8858	F7|F9|PROC|PROZ	-3.2	Input ID
Reactome	6	R-HSA-8964058	HDL remodeling	-5	26	9.9	24156	10	370	4	1.1	0.54	335|344|345|5360	APOA1|APOC2|APOC3|PLTP	-3.2	Input ID
Reactome	6	R-HSA-159740	Gamma-carboxylation of protein precursors	-5	26	9.9	24156	10	370	4	1.1	0.54	2155|2158|5624|8858	F7|F9|PROC|PROZ	-3.2	Input ID
Reactome	6	R-HSA-1474228	Degradation of the extracellular matrix	-5	5.1	6.1	24156	140	370	11	3	0.88	960|3818|3912|4312|4316|4318|4321|5340|6696|8754|164656	CD44|KLKB1|LAMB1|MMP1|MMP7|MMP9|MMP12|PLG|SPP1|ADAM9|TMPRSS6	-3.2	Input ID
Reactome	6	R-HSA-192105	Synthesis of bile acids and bile salts	-4.9	12	7.7	24156	34	370	6	1.6	0.66	1581|1593|6718|8309|10998|11001	CYP7A1|CYP27A1|AKR1D1|ACOX2|SLC27A5|SLC27A2	-3.2	Input ID
Reactome	6	R-HSA-2142691	Synthesis of Leukotrienes (LT) and Eoxins (EX)	-4.9	16	8.3	24156	21	370	5	1.4	0.6	241|1579|4051|4363|8529	ALOX5AP|CYP4A11|CYP4F3|ABCC1|CYP4F2	-3.1	Input ID
Reactome	6	R-HSA-159854	Gamma-carboxylation, transport, and amino-terminal cleavage of proteins	-4.8	24	9.4	24156	11	370	4	1.1	0.54	2155|2158|5624|8858	F7|F9|PROC|PROZ	-3.1	Input ID
Reactome	6	R-HSA-140875	Common Pathway of Fibrin Clot Formation	-4.8	15	8.1	24156	22	370	5	1.4	0.6	462|2165|5104|5270|5624	SERPINC1|F13B|SERPINA5|SERPINE2|PROC	-3	Input ID
Reactome	6	R-HSA-2187338	Visual phototransduction	-4.5	5.7	6	24156	103	370	9	2.4	0.8	335|344|345|1259|5950|7276|8608|29967|285440	APOA1|APOC2|APOC3|CNGA1|RBP4|TTR|RDH16|LRP12|CYP4V2	-2.8	Input ID
Reactome	6	R-HSA-211981	Xenobiotics	-4.5	13	7.5	24156	25	370	5	1.4	0.6	1548|1549|1551|1559|1577	CYP2A6|CYP2A7|CYP3A7|CYP2C9|CYP3A5	-2.8	Input ID
Reactome	6	R-HSA-8963684	Tyrosine catabolism	-4.5	39	11	24156	5	370	3	0.81	0.47	3081|3242|6898	HGD|HPD|TAT	-2.8	Input ID
Reactome	6	R-HSA-70350	Fructose catabolism	-4.5	39	11	24156	5	370	3	0.81	0.47	229|3795|132158	ALDOB|KHK|GLYCTK	-2.8	Input ID
Reactome	6	R-HSA-196854	Metabolism of vitamins and cofactors	-4.4	4.1	5.4	24156	189	370	12	3.2	0.92	335|344|345|4363|4594|5950|6513|6515|7276|8875|29967|53354	APOA1|APOC2|APOC3|ABCC1|MMUT|RBP4|SLC2A1|SLC2A3|TTR|VNN2|LRP12|PANK1	-2.8	Input ID
Reactome	6	R-HSA-975634	Retinoid metabolism and transport	-4.3	9.1	6.6	24156	43	370	6	1.6	0.66	335|344|345|5950|7276|29967	APOA1|APOC2|APOC3|RBP4|TTR|LRP12	-2.7	Input ID
Reactome	6	R-HSA-193775	Synthesis of bile acids and bile salts via 24-hydroxycholesterol	-4.3	19	8.2	24156	14	370	4	1.1	0.54	1593|6718|10998|11001	CYP27A1|AKR1D1|SLC27A5|SLC27A2	-2.7	Input ID
Reactome	6	R-HSA-418594	G alpha (i) signalling events	-4.2	2.9	4.8	24156	407	370	18	4.9	1.1	335|344|345|728|1259|1880|3827|5950|5996|6364|6370|6372|6374|7276|7852|8608|29967|285440	APOA1|APOC2|APOC3|C5AR1|CNGA1|GPR183|KNG1|RBP4|RGS1|CCL20|CCL25|CXCL6|CXCL5|TTR|CXCR4|RDH16|LRP12|CYP4V2	-2.6	Input ID
Reactome	6	R-HSA-211935	Fatty acids	-4.2	17	7.9	24156	15	370	4	1.1	0.54	1549|1579|4051|8529	CYP2A7|CYP4A11|CYP4F3|CYP4F2	-2.6	Input ID
Reactome	6	R-HSA-8857538	PTK6 promotes HIF1A stabilization	-4.2	33	9.7	24156	6	370	3	0.81	0.47	1839|3091|10457	HBEGF|HIF1A|GPNMB	-2.5	Input ID
Reactome	6	R-HSA-6806667	Metabolism of fat-soluble vitamins	-4.1	8.3	6.3	24156	47	370	6	1.6	0.66	335|344|345|5950|7276|29967	APOA1|APOC2|APOC3|RBP4|TTR|LRP12	-2.5	Input ID
Reactome	6	R-HSA-389661	Glyoxylate metabolism and glycine degradation	-4	11	6.6	24156	31	370	5	1.4	0.6	189|1610|2806|27232|55526	AGXT|DAO|GOT2|GNMT|DHTKD1	-2.4	Input ID
Reactome	6	R-HSA-8957322	Metabolism of steroids	-3.9	4.3	5.1	24156	151	370	10	2.7	0.84	866|1581|1593|6319|6554|6718|7108|8309|10998|11001	SERPINA6|CYP7A1|CYP27A1|SCD|SLC10A1|AKR1D1|TM7SF2|ACOX2|SLC27A5|SLC27A2	-2.3	Input ID
Reactome	6	R-HSA-5652084	Fructose metabolism	-3.9	28	8.9	24156	7	370	3	0.81	0.47	229|3795|132158	ALDOB|KHK|GLYCTK	-2.3	Input ID
Reactome	6	R-HSA-1592389	Activation of Matrix Metalloproteinases	-3.9	9.9	6.4	24156	33	370	5	1.4	0.6	3818|4312|4316|4318|5340	KLKB1|MMP1|MMP7|MMP9|PLG	-2.3	Input ID
Reactome	6	R-HSA-5686938	Regulation of TLR by endogenous ligand	-3.8	14	6.9	24156	19	370	4	1.1	0.54	6279|6280|7097|23643	S100A8|S100A9|TLR2|LY96	-2.2	Input ID
Reactome	6	R-HSA-177128	Conjugation of salicylate with glycine	-3.7	24	8.3	24156	8	370	3	0.81	0.47	54988|123876|348158	ACSM5|ACSM2A|ACSM2B	-2.2	Input ID
Reactome	6	R-HSA-9609507	Protein localization	-3.7	4	4.8	24156	163	370	10	2.7	0.84	189|847|1610|1962|3162|5264|5621|8309|11001|51268	AGXT|CAT|DAO|EHHADH|HMOX1|PHYH|PRNP|ACOX2|SLC27A2|PIPOX	-2.1	Input ID
Reactome	6	R-HSA-8963888	Chylomicron assembly	-3.6	22	7.8	24156	9	370	3	0.81	0.47	335|344|345	APOA1|APOC2|APOC3	-2	Input ID
Reactome	6	R-HSA-2142816	Synthesis of (16-20)-hydroxyeicosatetraenoic acids (HETE)	-3.6	22	7.8	24156	9	370	3	0.81	0.47	1559|1579|8529	CYP2C9|CYP4A11|CYP4F2	-2	Input ID
Reactome	6	R-HSA-2142688	Synthesis of 5-eicosatetraenoic acids	-3.6	22	7.8	24156	9	370	3	0.81	0.47	241|5444|5446	ALOX5AP|PON1|PON3	-2	Input ID
Reactome	6	R-HSA-8963901	Chylomicron remodeling	-3.6	22	7.8	24156	9	370	3	0.81	0.47	335|344|345	APOA1|APOC2|APOC3	-2	Input ID
Reactome	6	R-HSA-156587	Amino Acid conjugation	-3.6	22	7.8	24156	9	370	3	0.81	0.47	54988|123876|348158	ACSM5|ACSM2A|ACSM2B	-2	Input ID
Reactome	6	R-HSA-159424	Conjugation of carboxylic acids	-3.6	22	7.8	24156	9	370	3	0.81	0.47	54988|123876|348158	ACSM5|ACSM2A|ACSM2B	-2	Input ID
Reactome	6	R-HSA-2453902	The canonical retinoid cycle in rods (twilight vision)	-3.4	11	6.2	24156	23	370	4	1.1	0.54	5950|7276|8608|285440	RBP4|TTR|RDH16|CYP4V2	-1.9	Input ID
Reactome	6	R-HSA-70635	Urea cycle	-3.4	20	7.3	24156	10	370	3	0.81	0.47	383|1373|10166	ARG1|CPS1|SLC25A15	-1.9	Input ID
Reactome	6	R-HSA-1442490	Collagen degradation	-3.4	6.1	5.1	24156	64	370	6	1.6	0.66	4312|4316|4318|4321|8754|164656	MMP1|MMP7|MMP9|MMP12|ADAM9|TMPRSS6	-1.9	Input ID
Reactome	6	R-HSA-425407	SLC-mediated transmembrane transport	-3.3	3.1	4.2	24156	251	370	12	3.2	0.92	6510|6513|6514|6515|6529|6567|6580|9056|10864|10991|11309|81539	SLC1A5|SLC2A1|SLC2A2|SLC2A3|SLC6A1|SLC16A2|SLC22A1|SLC7A7|SLC22A7|SLC38A3|SLCO2B1|SLC38A1	-1.8	Input ID
Reactome	6	R-HSA-211999	CYP2E1 reactions	-3.3	18	7	24156	11	370	3	0.81	0.47	1548|1549|1559	CYP2A6|CYP2A7|CYP2C9	-1.8	Input ID
Reactome	6	R-HSA-8963691	Phenylalanine and tyrosine metabolism	-3.3	18	7	24156	11	370	3	0.81	0.47	3081|3242|6898	HGD|HPD|TAT	-1.8	Input ID
Reactome	6	R-HSA-211979	Eicosanoids	-3.2	16	6.6	24156	12	370	3	0.81	0.47	1579|4051|8529	CYP4A11|CYP4F3|CYP4F2	-1.7	Input ID
Reactome	6	R-HSA-211958	Miscellaneous substrates	-3.2	16	6.6	24156	12	370	3	0.81	0.47	1579|4051|8529	CYP4A11|CYP4F3|CYP4F2	-1.7	Input ID
Reactome	6	R-HSA-9024446	NR1H2 and NR1H3-mediated signaling	-3.1	6.9	5.1	24156	47	370	5	1.4	0.6	344|5360|6319|10123|29116	APOC2|PLTP|SCD|ARL4C|MYLIP	-1.7	Input ID
Reactome	6	R-HSA-1614635	Sulfur amino acid metabolism	-3.1	9.3	5.5	24156	28	370	4	1.1	0.54	635|2806|4143|7263	BHMT|GOT2|MAT1A|TST	-1.6	Input ID
Reactome	6	R-HSA-390918	Peroxisomal lipid metabolism	-3	9	5.4	24156	29	370	4	1.1	0.54	1962|5264|8309|11001	EHHADH|PHYH|ACOX2|SLC27A2	-1.6	Input ID
Reactome	6	R-HSA-112310	Neurotransmitter release cycle	-3	6.4	4.8	24156	51	370	5	1.4	0.6	18|6529|6580|7915|27165	ABAT|SLC6A1|SLC22A1|ALDH5A1|GLS2	-1.5	Input ID
Reactome	6	R-HSA-8963899	Plasma lipoprotein remodeling	-3	8.7	5.3	24156	30	370	4	1.1	0.54	335|344|345|5360	APOA1|APOC2|APOC3|PLTP	-1.5	Input ID
Reactome	6	R-HSA-189483	Heme degradation	-2.9	14	6.1	24156	14	370	3	0.81	0.47	3162|4363|11309	HMOX1|ABCC1|SLCO2B1	-1.5	Input ID
Reactome	6	R-HSA-202733	Cell surface interactions at the vascular wall	-2.9	3.8	4.1	24156	138	370	8	2.2	0.76	483|960|2207|3685|4312|4973|5624|9056	ATP1B3|CD44|FCER1G|ITGAV|MMP1|OLR1|PROC|SLC7A7	-1.5	Input ID
Reactome	6	R-HSA-6785807	Interleukin-4 and Interleukin-13 signaling	-2.9	4.2	4.2	24156	108	370	7	1.9	0.71	2353|3091|3162|3383|3570|4312|4318	FOS|HIF1A|HMOX1|ICAM1|IL6R|MMP1|MMP9	-1.4	Input ID
Reactome	6	R-HSA-193807	Synthesis of bile acids and bile salts via 27-hydroxycholesterol	-2.8	13	5.8	24156	15	370	3	0.81	0.47	1581|1593|6718	CYP7A1|CYP27A1|AKR1D1	-1.4	Input ID
Reactome	6	R-HSA-9648895	Response of EIF2AK1 (HRI) to heme deficiency	-2.8	13	5.8	24156	15	370	3	0.81	0.47	467|1649|23645	ATF3|DDIT3|PPP1R15A	-1.4	Input ID
Reactome	6	R-HSA-352230	Amino acid transport across the plasma membrane	-2.8	7.9	5	24156	33	370	4	1.1	0.54	6510|9056|10991|81539	SLC1A5|SLC7A7|SLC38A3|SLC38A1	-1.4	Input ID
Reactome	6	R-HSA-5663084	Diseases of carbohydrate metabolism	-2.8	7.7	4.9	24156	34	370	4	1.1	0.54	229|2538|2998|3795	ALDOB|G6PC|GYS2|KHK	-1.4	Input ID
Reactome	6	R-HSA-380108	Chemokine receptors bind chemokines	-2.7	5.5	4.3	24156	59	370	5	1.4	0.6	6364|6370|6372|6374|7852	CCL20|CCL25|CXCL6|CXCL5|CXCR4	-1.3	Input ID
Reactome	6	R-HSA-1989781	PPARA activates gene expression	-2.7	3.9	3.9	24156	117	370	7	1.9	0.71	123|335|1579|1581|3158|5244|27242	PLIN2|APOA1|CYP4A11|CYP7A1|HMGCS2|ABCB4|TNFRSF21	-1.3	Input ID
Reactome	6	R-HSA-9006931	Signaling by Nuclear Receptors	-2.6	2.6	3.5	24156	299	370	12	3.2	0.92	124|344|1839|2353|3725|4316|4318|5360|6319|8608|10123|29116	ADH1A|APOC2|HBEGF|FOS|JUN|MMP7|MMP9|PLTP|SCD|RDH16|ARL4C|MYLIP	-1.3	Input ID
Reactome	6	R-HSA-75105	Fatty acyl-CoA biosynthesis	-2.6	7.1	4.6	24156	37	370	4	1.1	0.54	5538|6319|7923|11000	PPT1|SCD|HSD17B8|SLC27A3	-1.3	Input ID
Reactome	6	R-HSA-400206	Regulation of lipid metabolism by PPARalpha	-2.6	3.8	3.9	24156	119	370	7	1.9	0.71	123|335|1579|1581|3158|5244|27242	PLIN2|APOA1|CYP4A11|CYP7A1|HMGCS2|ABCB4|TNFRSF21	-1.3	Input ID
Reactome	6	R-HSA-8963898	Plasma lipoprotein assembly	-2.6	11	5.2	24156	18	370	3	0.81	0.47	335|344|345	APOA1|APOC2|APOC3	-1.2	Input ID
Reactome	6	R-HSA-888590	GABA synthesis, release, reuptake and degradation	-2.5	10	5.1	24156	19	370	3	0.81	0.47	18|6529|7915	ABAT|SLC6A1|ALDH5A1	-1.2	Input ID
Reactome	6	R-HSA-163841	Gamma carboxylation, hypusine formation and arylsulfatase activation	-2.5	6.7	4.4	24156	39	370	4	1.1	0.54	2155|2158|5624|8858	F7|F9|PROC|PROZ	-1.2	Input ID
Reactome	6	R-HSA-189200	Cellular hexose transport	-2.4	9.3	4.8	24156	21	370	3	0.81	0.47	6513|6514|6515	SLC2A1|SLC2A2|SLC2A3	-1.1	Input ID
Reactome	6	R-HSA-174824	Plasma lipoprotein assembly, remodeling, and clearance	-2.4	4.7	3.9	24156	69	370	5	1.4	0.6	335|344|345|5360|29116	APOA1|APOC2|APOC3|PLTP|MYLIP	-1.1	Input ID
Reactome	6	R-HSA-112409	RAF-independent MAPK1/3 activation	-2.3	8.5	4.5	24156	23	370	3	0.81	0.47	1847|1848|3570	DUSP5|DUSP6|IL6R	-0.99	Input ID
Reactome	6	R-HSA-3000178	ECM proteoglycans	-2.2	4.3	3.6	24156	76	370	5	1.4	0.6	1462|3673|3685|3912|5054	VCAN|ITGA2|ITGAV|LAMB1|SERPINE1	-0.91	Input ID
Reactome	6	R-HSA-210991	Basigin interactions	-2.2	7.8	4.3	24156	25	370	3	0.81	0.47	483|4312|9056	ATP1B3|MMP1|SLC7A7	-0.91	Input ID
Reactome	6	R-HSA-163685	Integration of energy metabolism	-2.2	3.6	3.4	24156	108	370	6	1.6	0.66	4082|5313|6513|6514|7086|51085	MARCKS|PKLR|SLC2A1|SLC2A2|TKT|MLXIPL	-0.9	Input ID
Reactome	6	R-HSA-189445	Metabolism of porphyrins	-2.1	7.5	4.2	24156	26	370	3	0.81	0.47	3162|4363|11309	HMOX1|ABCC1|SLCO2B1	-0.87	Input ID
Reactome	6	R-HSA-1368108	BMAL1:CLOCK,NPAS2 activates circadian gene expression	-2.1	7.3	4.1	24156	27	370	3	0.81	0.47	2155|5054|28999	F7|SERPINE1|KLF15	-0.83	Input ID
Reactome	6	R-HSA-211976	Endogenous sterols	-2.1	7.3	4.1	24156	27	370	3	0.81	0.47	1581|1593|285440	CYP7A1|CYP27A1|CYP4V2	-0.83	Input ID
Reactome	6	R-HSA-216083	Integrin cell surface interactions	-2	3.8	3.3	24156	85	370	5	1.4	0.6	960|3383|3673|3685|6696	CD44|ICAM1|ITGA2|ITGAV|SPP1	-0.75	Input ID
