# Supplementary material for: Hypoxia associated multi-omics molecular landscape of tumor tissue in patients with hepatocellular carcinoma
Source: Aging (Albany NY). 2021 Mar 10;13(5):6525–53. doi: 10.18632/aging.202723 (PMC7993683; doi:10.18632/aging.202723)
Supplement: Supplementary Table 7 [file aging-13-202723-s007.xlsx]

## Sheet: Table S7
Supplementary Table 7. Differential expressed lncRNAs between high hypoxia score and low hypoxia score groups in TCGA-LIHC
Gene symbol	logFC	adj.P.Val	changes in high hypoxia score group
PLAC4	5.8597	0.023018	up-regulated
PICSAR	4.96736	0.0495665	up-regulated
ERVH48-1	4.49482	0.0220811	up-regulated
AC007099	4.33711	0.000310868	up-regulated
AC010457	4.10663	0.0335158	up-regulated
AC083809	3.80715	2.23e-06	up-regulated
AC139749	3.61385	0.00920982	up-regulated
SOX21-AS1	3.41053	0.00699779	up-regulated
LINC02489	3.25277	0.00611177	up-regulated
LINC00460	3.17443	0.00392106	up-regulated
AC105446	3.14822	2.22e-05	up-regulated
AL391056	2.86544	3.46e-08	up-regulated
LINC00632	2.83123	3e-05	up-regulated
LINC02413	2.70502	0.0223966	up-regulated
AC004264	2.69512	1.24e-05	up-regulated
FOXD3-AS1	2.66127	0.0187408	up-regulated
BLACAT1	2.65964	0.00152677	up-regulated
AC110741	2.61272	0.00274529	up-regulated
FLJ16779	2.58491	0.0386792	up-regulated
LINC00887	2.58415	4.83e-05	up-regulated
LINC00941	2.58155	5.46e-07	up-regulated
SRGAP3-AS2	2.5568	0.024977	up-regulated
AC023154	2.52858	0.00802668	up-regulated
SLCO4A1-AS1	2.52835	0.00454971	up-regulated
LINC00958	2.50159	0.00677452	up-regulated
LINC01711	2.49214	0.00111753	up-regulated
LINC02154	2.47126	1.63e-05	up-regulated
C10orf91	2.41237	0.00231673	up-regulated
LINC02577	2.40139	0.000301821	up-regulated
LINC01559	2.38293	0.000586177	up-regulated
LINC01293	2.38283	0.000339924	up-regulated
LINC01508	2.38015	0.0465619	up-regulated
LINC00540	2.31522	0.000367828	up-regulated
LINC00323	2.27418	0.00276217	up-regulated
LINC00443	2.24978	0.0399527	up-regulated
AC017076	2.22759	0.0131539	up-regulated
LINC01436	2.21377	0.0078046	up-regulated
AL359313	2.21235	0.000563794	up-regulated
AC087623	2.2107	0.0288731	up-regulated
MIR210HG	2.21006	1.28e-15	up-regulated
LINC01587	2.20216	0.0116331	up-regulated
ROR1-AS1	2.17252	0.01536	up-regulated
AC011944	2.14831	0.000259997	up-regulated
AC061992	2.13327	3.46e-08	up-regulated
ITGB1-DT	2.13206	0.00086939	up-regulated
AL049836	2.1288	0.000416206	up-regulated
AC015987	2.12406	0.025512	up-regulated
AL138828	2.11009	0.03279	up-regulated
AP002852	2.10648	0.000146316	up-regulated
TMEM51-AS1	2.10267	2e-07	up-regulated
EGFR-AS1	2.09789	0.0406824	up-regulated
AC103770	2.09778	0.0164107	up-regulated
AC002480	2.08362	0.00153206	up-regulated
IGFL2-AS1	2.08137	0.0383184	up-regulated
LINC01014	2.06202	0.0112385	up-regulated
MYOSLID	2.04146	0.0450449	up-regulated
LINC00462	2.0324	0.0253287	up-regulated
AC104248	2.0294	0.00019922	up-regulated
AP005271	2.01621	0.0152772	up-regulated
LINC02086	1.99841	0.0372718	up-regulated
LINC00661	1.99465	0.00153088	up-regulated
AL163953	1.98369	0.0010178	up-regulated
LINC00501	1.97903	0.000803281	up-regulated
BBOX1-AS1	1.97066	0.0380279	up-regulated
AC025580	1.96768	0.000684987	up-regulated
FLJ22447	1.95114	0.0187408	up-regulated
AC124798	1.93932	3.79e-06	up-regulated
AC019117	1.89894	0.00226571	up-regulated
AL355596	1.88861	0.00235947	up-regulated
TBILA	1.88046	0.000368592	up-regulated
LINC00970	1.88026	0.025512	up-regulated
LINC00239	1.87503	1.64e-07	up-regulated
LINC00511	1.86423	3.98e-08	up-regulated
LINC00160	1.84883	0.0036025	up-regulated
AC022092	1.83484	0.000120457	up-regulated
AP000864	1.81195	0.0200313	up-regulated
AL353803	1.80509	0.000586117	up-regulated
AC023449	1.78945	1.63e-05	up-regulated
LHFPL3-AS2	1.78925	3.24e-05	up-regulated
AC078850	1.78709	9.51e-05	up-regulated
AP000593	1.78226	0.0246095	up-regulated
CASC8	1.77706	0.0400946	up-regulated
CD44-AS1	1.77026	0.000177188	up-regulated
AL583722	1.76272	0.0029169	up-regulated
AC092964	1.75953	1.64e-08	up-regulated
AC114811	1.74689	0.0155505	up-regulated
LINC00520	1.73126	0.00135045	up-regulated
LINC01303	1.7221	0.000404037	up-regulated
LINC01638	1.71907	0.0362105	up-regulated
LINC01479	1.71378	0.0480379	up-regulated
AL353751	1.69404	0.0195228	up-regulated
RNF144A-AS1	1.6814	0.000902303	up-regulated
AC079209	1.67834	3.81e-05	up-regulated
AC087645	1.67477	7.6e-05	up-regulated
AC019069	1.67205	2.38e-05	up-regulated
AC090192	1.67039	0.000266754	up-regulated
HIF1A-AS2	1.66452	0.000528092	up-regulated
C1QTNF1-AS1	1.65413	1.95e-05	up-regulated
LINC01338	1.649	0.00014121	up-regulated
AC012625	1.63856	0.0311414	up-regulated
LINC01993	1.6141	4.2e-05	up-regulated
LINC01119	1.61038	0.0105691	up-regulated
AC010980	1.60588	0.0364884	up-regulated
Z98257	1.60483	0.00414304	up-regulated
AL162424	1.60324	0.00182651	up-regulated
LINC01358	1.58468	0.00117275	up-regulated
NEBL-AS1	1.57375	0.00812475	up-regulated
AC013275	1.57149	0.0032866	up-regulated
SMIM25	1.56193	4.45e-07	up-regulated
AC098476	1.55893	0.0350305	up-regulated
AL109615	1.55596	2.85e-07	up-regulated
AP002478	1.55522	0.0013535	up-regulated
LINC02454	1.55006	0.0484021	up-regulated
AC004130	1.54326	0.0187408	up-regulated
AL031665	1.537	0.000137763	up-regulated
AL158166	1.5351	0.0110958	up-regulated
LINC01091	1.51925	3.24e-05	up-regulated
AC084083	1.51581	0.0178324	up-regulated
LINC02345	1.51395	6.1e-05	up-regulated
AL022316	1.51373	0.0389838	up-regulated
AC004540	1.50457	0.0400946	up-regulated
AL691482	1.49431	0.000484216	up-regulated
SLC2A1-AS1	1.49174	9.9e-06	up-regulated
AC113383	1.48972	0.0120627	up-regulated
AC040174	1.48455	0.0089042	up-regulated
AL137145	1.47967	0.00225153	up-regulated
LINC02381	1.45658	0.00276992	up-regulated
AP001043	1.45135	0.0430703	up-regulated
AP001033	1.44446	0.0317752	up-regulated
AC089983	1.44055	0.00103813	up-regulated
AP000569	1.43508	0.000343648	up-regulated
AC156455	1.43006	6.45e-06	up-regulated
CASC15	1.42424	4.16e-05	up-regulated
AC079089	1.41428	0.00528934	up-regulated
AC023090	1.40854	0.0218702	up-regulated
LINC01060	1.40226	0.0182462	up-regulated
IL21-AS1	1.40112	0.0418937	up-regulated
TRPM2-AS	1.39716	0.000165577	up-regulated
AC006273	1.39046	0.0344786	up-regulated
STXBP5-AS1	1.38933	0.000539251	up-regulated
AC104088	1.38801	0.00722382	up-regulated
AL590004	1.38744	0.000108369	up-regulated
C1orf195	1.38668	0.00207759	up-regulated
AC034213	1.3562	0.00479713	up-regulated
PSORS1C3	1.35464	0.008111	up-regulated
HIF1A-AS1	1.35389	0.0352478	up-regulated
AC074033	1.34712	0.0498999	up-regulated
LINC01929	1.34342	0.0232539	up-regulated
LINC01094	1.33744	3.81e-05	up-regulated
APCDD1L-DT	1.33723	9.82e-05	up-regulated
INKA2-AS1	1.33394	4.39e-08	up-regulated
AC007608	1.32819	0.0200313	up-regulated
ITGA6-AS1	1.32754	5.77e-10	up-regulated
TBX2-AS1	1.32704	0.00260516	up-regulated
LINC01423	1.32662	0.00349297	up-regulated
AC098613	1.32075	0.0129236	up-regulated
DDN-AS1	1.31791	6.93e-05	up-regulated
AC090116	1.31497	0.00669162	up-regulated
AC010655	1.31065	0.000441258	up-regulated
AC084117	1.30739	1.34e-05	up-regulated
AL133330	1.30711	0.00113383	up-regulated
AF064858	1.30576	0.00065874	up-regulated
AL356215	1.30502	0.000219976	up-regulated
AC002076	1.30488	0.0247003	up-regulated
AC026356	1.29308	1.71e-06	up-regulated
AL161938	1.293	0.00218888	up-regulated
LINC01116	1.28398	0.0459329	up-regulated
AC024940	1.28289	1.3e-05	up-regulated
AC007384	1.2789	7.69e-05	up-regulated
AL157395	1.2787	0.0252294	up-regulated
LINC01503	1.27838	2.75e-05	up-regulated
AC129492	1.27745	0.0149619	up-regulated
AC097059	1.27413	0.00696441	up-regulated
AP002847	1.26919	0.0352049	up-regulated
LINC02432	1.26446	0.0203136	up-regulated
ZFPM2-AS1	1.26208	0.0320563	up-regulated
LINC01410	1.25443	0.00880598	up-regulated
AL021154	1.24026	0.00266354	up-regulated
AC002525	1.23719	0.00361259	up-regulated
VLDLR-AS1	1.23237	1.25e-07	up-regulated
LINC02313	1.23111	0.000650516	up-regulated
GK-IT1	1.22634	1.71e-06	up-regulated
AC044849	1.22366	3.48e-05	up-regulated
GLIS3-AS1	1.22057	0.00472033	up-regulated
LINC01433	1.21532	0.00297524	up-regulated
AC020916	1.20093	5.67e-05	up-regulated
LINC02048	1.19458	0.0117324	up-regulated
LINC01619	1.18489	0.0293519	up-regulated
LINC02041	1.18333	0.0381566	up-regulated
LINC00862	1.18055	0.0246095	up-regulated
SNAP25-AS1	1.18011	0.0291162	up-regulated
AC087588	1.17953	0.0173563	up-regulated
AC007569	1.17222	0.0269676	up-regulated
AL161645	1.16913	0.00812475	up-regulated
ATP1B3-AS1	1.16549	0.0104616	up-regulated
TTC39A-AS1	1.14793	0.0267021	up-regulated
AC027117	1.14676	0.00357372	up-regulated
OSMR-AS1	1.14314	4.88e-06	up-regulated
AC068594	1.13776	0.000270614	up-regulated
AC099560	1.13049	0.0491586	up-regulated
RPS6KA2-IT1	1.12592	0.0104616	up-regulated
SPRY4-AS1	1.12484	0.000494977	up-regulated
AL353150	1.12437	0.00833828	up-regulated
LINC01679	1.11359	0.00551069	up-regulated
AC087491	1.108	0.0484234	up-regulated
LNCSRLR	1.10717	0.000112789	up-regulated
AL021392	1.10346	3.81e-05	up-regulated
AC245595	1.10335	0.0160789	up-regulated
UNC5B-AS1	1.10188	0.000123171	up-regulated
AC008750	1.09444	0.0225104	up-regulated
AC097358	1.09158	0.008111	up-regulated
AL590560	1.08779	0.00245754	up-regulated
STK32A-AS1	1.08769	0.0449053	up-regulated
AC097478	1.08655	0.0472855	up-regulated
LINC01374	1.08223	0.000742974	up-regulated
ELN-AS1	1.0816	0.0048041	up-regulated
AC067931	1.07847	9.78e-06	up-regulated
AC007998	1.07385	0.00714431	up-regulated
AC037198	1.07275	0.00175783	up-regulated
AC116563	1.07088	0.00954937	up-regulated
AC011773	1.0702	0.00255824	up-regulated
AC044781	1.07016	0.0155505	up-regulated
CASC19	1.06761	0.000477538	up-regulated
TNRC6C-AS1	1.06654	0.00855597	up-regulated
LINC02207	1.06487	0.00672003	up-regulated
AL022067	1.06342	0.00798461	up-regulated
AC013476	1.06203	1.34e-05	up-regulated
AGAP1-IT1	1.06023	0.00992963	up-regulated
LINC00865	1.0583	0.029553	up-regulated
SNHG26	1.05401	0.00327511	up-regulated
AL096865	1.05383	0.020546	up-regulated
FLJ31356	1.05358	0.00416131	up-regulated
AC140912	1.05251	0.0267021	up-regulated
AP000577	1.05138	1.27e-05	up-regulated
AC068189	1.05062	0.00103669	up-regulated
NKILA	1.04953	0.0399527	up-regulated
WASIR2	1.03788	0.012148	up-regulated
ADAMTS9-AS1	1.03782	0.00617425	up-regulated
AC091806	1.03762	0.00577227	up-regulated
SNHG3	1.03328	0.000851479	up-regulated
AC091868	1.03086	0.00118435	up-regulated
FOXP4-AS1	1.02991	0.0328233	up-regulated
AC040970	1.02898	0.0173458	up-regulated
Z93241	1.0248	0.000215856	up-regulated
AC026368	1.02232	0.0371497	up-regulated
AC092756	1.02151	0.0421901	up-regulated
AC108058	1.01846	0.0111326	up-regulated
LINC00920	1.01766	0.0203136	up-regulated
AL358473	1.01707	8.14e-05	up-regulated
RNF157-AS1	1.01634	0.0110366	up-regulated
AC026992	1.01501	0.00441152	up-regulated
AC107398	1.01501	0.0121075	up-regulated
AF127936	1.00273	0.0442973	up-regulated
AC068722	1.00051	0.00615976	up-regulated
LINC00705	0.999076	0.00920366	up-regulated
WWTR1-IT1	0.990791	0.00168958	up-regulated
LINC01220	0.990289	0.0010178	up-regulated
PTGES2-AS1	0.987312	0.0260101	up-regulated
FP325331	0.986928	0.0018173	up-regulated
AL139130	0.985466	0.0110366	up-regulated
AC145423	0.981549	0.00617425	up-regulated
LINC02465	0.976583	0.0254197	up-regulated
AC009005	0.974598	0.00439587	up-regulated
LINC01948	0.96856	0.000448776	up-regulated
AC106897	0.967703	0.000742974	up-regulated
HOMER3-AS1	0.96768	0.000339924	up-regulated
AC046143	0.966765	3.98e-08	up-regulated
AC018682	0.960165	0.000803258	up-regulated
LINC01353	0.959392	0.00249706	up-regulated
AL158206	0.957631	1.99e-05	up-regulated
LINC01088	0.957205	0.00182651	up-regulated
WDFY3-AS2	0.956672	0.000315176	up-regulated
AC012486	0.954765	0.0110366	up-regulated
PRKG1-AS1	0.954074	0.0187788	up-regulated
VAC14-AS1	0.952118	0.0218702	up-regulated
LINC-PINT	0.95119	3.25e-07	up-regulated
AC007255	0.945067	0.0262079	up-regulated
CFAP58-DT	0.941109	0.0108303	up-regulated
AC002454	0.939446	0.0010178	up-regulated
AC026250	0.934441	0.0150199	up-regulated
AL121578	0.932539	0.012863	up-regulated
LINC00900	0.931074	0.0100716	up-regulated
AC073072	0.930364	0.0134368	up-regulated
AL356124	0.92696	0.00514747	up-regulated
PRR7-AS1	0.922819	0.00333918	up-regulated
AL139005	0.922153	0.00211952	up-regulated
AC074011	0.921606	0.0208555	up-regulated
AL117335	0.919278	0.000392038	up-regulated
BOLA3-AS1	0.916847	0.0468554	up-regulated
LINC02038	0.907567	0.00677452	up-regulated
PPFIA2-AS1	0.907212	0.0204357	up-regulated
AC107021	0.905919	0.0333322	up-regulated
CR786580	0.905446	0.00401549	up-regulated
DLGAP1-AS2	0.901017	3.81e-05	up-regulated
SLC12A5-AS1	0.900571	0.0277626	up-regulated
AC073333	0.899338	0.0231255	up-regulated
MAFG-DT	0.897916	8.87e-06	up-regulated
DNAH17-AS1	0.894824	8.03e-05	up-regulated
AC023825	0.888588	0.0335158	up-regulated
AC009093	0.886817	0.0038067	up-regulated
MIR3142HG	0.884502	0.0334159	up-regulated
AL162386	0.88356	0.00111115	up-regulated
LINC01186	0.882607	0.00435872	up-regulated
AP000251	0.881605	0.0206102	up-regulated
AL158825	0.879619	0.00018497	up-regulated
MIR181A2HG	0.878344	0.0165976	up-regulated
AL139423	0.87319	0.000192859	up-regulated
LUCAT1	0.872411	0.00206497	up-regulated
MKLN1-AS	0.871955	1.64e-08	up-regulated
AL513283	0.871728	0.0335158	up-regulated
AC027319	0.871544	0.0147685	up-regulated
NR2F1-AS1	0.871143	0.000712818	up-regulated
LINC00479	0.870892	0.0238722	up-regulated
LINC02601	0.868375	0.0168465	up-regulated
AC105285	0.867425	0.0314754	up-regulated
AC090673	0.867408	0.000403431	up-regulated
AC078883	0.867078	3.76e-06	up-regulated
LINC02576	0.864735	0.039151	up-regulated
LIMS1-AS1	0.862383	0.0234885	up-regulated
AL110115	0.861139	0.0010178	up-regulated
LINC01829	0.859737	0.0313336	up-regulated
AC027702	0.855613	0.00617425	up-regulated
AL049539	0.853159	0.0218102	up-regulated
AL607028	0.851804	0.000845348	up-regulated
AC007966	0.851018	0.0455682	up-regulated
AC245297	0.849049	0.0345027	up-regulated
AC011287	0.844612	0.0404751	up-regulated
LINC01106	0.844024	0.0208555	up-regulated
SNHG28	0.839843	0.0077877	up-regulated
AC005479	0.839608	0.0296583	up-regulated
AL606534	0.838506	0.010728	up-regulated
AL451042	0.836463	0.0112368	up-regulated
AC109826	0.836425	0.0432978	up-regulated
AL358216	0.834866	0.0215495	up-regulated
DARS-AS1	0.834105	1.2e-08	up-regulated
FAM182B	0.832172	0.0468554	up-regulated
AL121787	0.830308	0.0318531	up-regulated
LINC00628	0.829244	0.0284298	up-regulated
AL139147	0.827741	0.00505069	up-regulated
AC007285	0.824359	0.0387154	up-regulated
AC087521	0.823166	0.0120904	up-regulated
CASC16	0.82216	0.000723767	up-regulated
LINC00336	0.820842	0.0015811	up-regulated
LINC00513	0.818984	0.00828368	up-regulated
AC040160	0.814761	0.0319208	up-regulated
AC132192	0.811907	0.048922	up-regulated
AC018450	0.810624	0.00182651	up-regulated
TMEM26-AS1	0.809328	0.0214086	up-regulated
TMEM92-AS1	0.80853	0.0103473	up-regulated
PIK3CD-AS2	0.80537	0.0103009	up-regulated
HCFC1-AS1	0.805041	0.0351762	up-regulated
HOXA-AS3	0.802103	0.0128573	up-regulated
AL596223	0.801736	0.00311732	up-regulated
AL442125	0.798249	0.0128445	up-regulated
FSIP2-AS1	0.795706	0.0308118	up-regulated
SPATA3-AS1	0.795458	0.0293959	up-regulated
AL133264	0.794197	0.0480379	up-regulated
AP001381	0.79395	0.0232059	up-regulated
AC010524	0.791378	0.0433284	up-regulated
CASK-AS1	0.785351	0.0208555	up-regulated
LINC01068	0.784785	0.0481186	up-regulated
LINC01876	0.784166	0.0159197	up-regulated
AL590006	0.783358	0.0042225	up-regulated
AL606763	0.780218	0.0171128	up-regulated
TM4SF1-AS1	0.779067	0.0302382	up-regulated
AC002401	0.778561	0.0182456	up-regulated
AL158151	0.778499	0.0010178	up-regulated
C17orf82	0.773972	0.00119508	up-regulated
LINC02147	0.773654	0.0262079	up-regulated
SPACA6P-AS	0.772437	0.00276217	up-regulated
ZFAS1	0.77242	0.000101344	up-regulated
ACTN1-AS1	0.768653	0.00454971	up-regulated
AC015853	0.764587	0.0428944	up-regulated
DUBR	0.764393	0.0227374	up-regulated
MIR222HG	0.763896	0.00227979	up-regulated
LINC01943	0.763386	0.0304127	up-regulated
AC073611	0.76212	1.29e-05	up-regulated
LUARIS	0.760728	0.0175349	up-regulated
LINC02391	0.755557	0.0125595	up-regulated
LINC00922	0.752742	0.0498447	up-regulated
ABALON	0.751439	0.0344786	up-regulated
LINC01356	0.751246	0.0141388	up-regulated
PCAT6	0.748419	0.00121751	up-regulated
NFIA-AS2	0.74835	0.0450821	up-regulated
AC087620	0.745341	0.0271487	up-regulated
AC007490	0.743606	0.0108439	up-regulated
AC068196	0.740789	0.031651	up-regulated
LINC01504	0.74021	0.0120627	up-regulated
DANCR	0.739935	0.00132911	up-regulated
MEF2C-AS1	0.739586	0.0255034	up-regulated
CHRM3-AS2	0.739076	0.0146867	up-regulated
AC138207	0.738981	0.0335158	up-regulated
AC015799	0.735767	0.0215495	up-regulated
AC002378	0.735071	0.0260101	up-regulated
AL022329	0.730343	0.0384654	up-regulated
AC112722	0.726305	0.0165976	up-regulated
AC009414	0.725639	0.0498403	up-regulated
LINC00243	0.725504	0.00112492	up-regulated
AC005632	0.725314	0.00018815	up-regulated
SNHG12	0.724824	0.000192859	up-regulated
STEAP2-AS1	0.724257	0.024095	up-regulated
AL138720	0.720698	0.0131911	up-regulated
AC007773	0.720308	0.0255034	up-regulated
KCNJ2-AS1	0.719826	0.00415906	up-regulated
LRP1-AS	0.719285	0.0408835	up-regulated
LEF1-AS1	0.716801	0.000545225	up-regulated
ELF3-AS1	0.714337	0.0380279	up-regulated
LINC01473	0.713041	0.000428627	up-regulated
AC125437	0.712858	0.00505069	up-regulated
FUT8-AS1	0.710038	0.00836623	up-regulated
AC073130	0.709192	0.0260104	up-regulated
AC131254	0.708676	0.00072906	up-regulated
LINC02003	0.707349	0.0159869	up-regulated
HOTAIRM1	0.705749	0.0438638	up-regulated
LINC00968	0.70568	0.0261663	up-regulated
KLHL30-AS1	0.703054	0.049822	up-regulated
AC020571	0.699965	0.00171015	up-regulated
AC068700	0.699359	0.00880598	up-regulated
C1orf147	0.699325	0.0238309	up-regulated
HRAT5	0.698967	0.0134434	up-regulated
DGUOK-AS1	0.698678	0.0147991	up-regulated
RBPMS-AS1	0.698145	0.0455752	up-regulated
AL162741	0.694077	0.023018	up-regulated
AL359740	0.693746	0.0222111	up-regulated
AL035665	0.693058	0.0302382	up-regulated
AC131888	0.692703	0.0148409	up-regulated
AL354993	0.692047	0.0442973	up-regulated
AC007336	0.691421	0.000677955	up-regulated
AL513218	0.690533	0.0302488	up-regulated
AC114760	0.689447	0.00994147	up-regulated
LINC02389	0.689389	0.00018497	up-regulated
AL513327	0.684551	0.0328233	up-regulated
ERICD	0.68254	0.00274529	up-regulated
DPYD-IT1	0.678747	0.0162896	up-regulated
AC005534	0.67872	0.023068	up-regulated
AL445471	0.677377	0.0155317	up-regulated
AC099524	0.67548	0.0406824	up-regulated
AC004069	0.672391	0.00392106	up-regulated
AL139220	0.671256	0.00203174	up-regulated
AC005540	0.668874	0.0077877	up-regulated
ZNF341-AS1	0.666041	0.0226974	up-regulated
AL023653	0.662265	0.0209162	up-regulated
DKFZP434K028	0.660467	0.0376568	up-regulated
AC009275	0.660286	0.0365316	up-regulated
ARHGAP31-AS1	0.659098	0.0486998	up-regulated
FBXL19-AS1	0.658856	0.00488434	up-regulated
AC008622	0.658625	0.00992963	up-regulated
SNHG6	0.654091	0.0171804	up-regulated
AL606834	0.652202	0.00048794	up-regulated
ADAMTS9-AS2	0.651669	0.0136855	up-regulated
SNHG15	0.649606	0.0155566	up-regulated
AL359880	0.648914	0.0260101	up-regulated
AL133230	0.646997	0.0202082	up-regulated
AC040904	0.645959	0.0302382	up-regulated
AC002540	0.644724	0.0389838	up-regulated
ITPKB-IT1	0.64346	0.0273856	up-regulated
AL133297	0.643251	0.0261959	up-regulated
SLC8A1-AS1	0.641738	0.0169766	up-regulated
AL049597	0.641596	0.00481505	up-regulated
AC004816	0.640621	0.0149012	up-regulated
AL357079	0.639542	0.0122721	up-regulated
AC106712	0.639241	0.0461089	up-regulated
DHCR24-DT	0.638884	0.00280598	up-regulated
ZDHHC20-IT1	0.637249	0.0247593	up-regulated
IER3-AS1	0.635976	0.000373256	up-regulated
AC131009	0.634872	0.0187147	up-regulated
AC009542	0.634013	0.00450939	up-regulated
RHPN1-AS1	0.631924	0.00806157	up-regulated
AC110799	0.631108	0.0350138	up-regulated
AC019077	0.625814	0.0272503	up-regulated
TBL1XR1-AS1	0.624642	0.0455752	up-regulated
AC112491	0.620492	0.0447044	up-regulated
AC107027	0.620347	0.0498447	up-regulated
AC023590	0.618896	0.0125595	up-regulated
ELDR	0.618539	0.0433322	up-regulated
TNFRSF10A-AS1	0.617846	0.0419527	up-regulated
NRSN2-AS1	0.617323	0.00191574	up-regulated
AC027373	0.614839	0.00694938	up-regulated
AC005330	0.614581	0.0152772	up-regulated
AC022558	0.61384	0.0442973	up-regulated
HSD52	0.613079	0.000563794	up-regulated
AL359198	0.613054	0.00397232	up-regulated
AC079906	0.612212	0.0262079	up-regulated
MAP3K20-AS1	0.611077	0.00393857	up-regulated
DLGAP1-AS1	0.603672	0.000270719	up-regulated
FLJ33534	0.60264	0.00699779	up-regulated
AC010761	0.602312	0.000750651	up-regulated
AC009119	0.597469	0.0451851	up-regulated
AL592166	0.593319	0.00662585	up-regulated
MIR4435-2HG	0.592874	0.00238339	up-regulated
C22orf34	0.590712	0.0305927	up-regulated
AC096720	0.588255	0.000146316	up-regulated
AD000864	0.585674	0.00992963	up-regulated
AL078644	0.58548	0.00777236	up-regulated
LINC01136	0.585188	0.0293519	up-regulated
ASAP1-IT2	0.584226	0.0103009	up-regulated
LINC02081	0.582932	0.000512735	up-regulated
AC022893	0.580906	0.00913081	up-regulated
AL365214	0.580229	0.00630512	up-regulated
AC007292	-0.581173	0.00201266	down-regulated
AC104211	-0.58215	0.0226282	down-regulated
AC005476	-0.583189	0.000204721	down-regulated
ERVK9-11	-0.585637	0.0412039	down-regulated
AC016026	-0.585944	0.0260101	down-regulated
OGFR-AS1	-0.59269	0.0398274	down-regulated
AL360219	-0.593562	0.0385965	down-regulated
LINC01485	-0.593723	0.00566246	down-regulated
AL592424	-0.595715	0.0150163	down-regulated
AC016924	-0.596589	0.0420552	down-regulated
AL157762	-0.598272	0.0257551	down-regulated
AC007613	-0.602656	0.00154259	down-regulated
C1RL-AS1	-0.605271	0.000741131	down-regulated
AL023806	-0.612163	0.0196992	down-regulated
TMEM220-AS1	-0.613105	5.49e-05	down-regulated
VWA8-AS1	-0.614892	0.00160469	down-regulated
AC009974	-0.616387	0.00479686	down-regulated
AP003031	-0.616679	0.00129016	down-regulated
TBC1D22A-AS1	-0.61687	0.0316322	down-regulated
AP004608	-0.62062	0.00450939	down-regulated
LINC01341	-0.622745	0.00456295	down-regulated
AC114341	-0.627609	0.000563794	down-regulated
AC109809	-0.630473	0.00488434	down-regulated
AC090772	-0.631761	0.0117024	down-regulated
AC084082	-0.636227	0.0179587	down-regulated
AL158063	-0.645156	0.00690275	down-regulated
AL391497	-0.647432	0.0176336	down-regulated
AC005695	-0.651253	0.00479713	down-regulated
AL137793	-0.656412	0.0332906	down-regulated
NAV2-AS4	-0.657215	0.0322068	down-regulated
LINC01719	-0.660308	0.0133664	down-regulated
A1BG-AS1	-0.66245	0.00104778	down-regulated
EHD4-AS1	-0.663213	0.00607768	down-regulated
Z93930	-0.666389	0.000243315	down-regulated
AL359915	-0.668713	0.00190307	down-regulated
AC093274	-0.669164	0.0218702	down-regulated
PCAT7	-0.672002	0.0029169	down-regulated
HCG14	-0.672223	0.00273936	down-regulated
HNF4A-AS1	-0.672649	0.00167773	down-regulated
AC137723	-0.67636	0.0148753	down-regulated
AC010300	-0.678323	0.00556772	down-regulated
AC079061	-0.681282	0.0473528	down-regulated
AC011005	-0.693012	0.0105882	down-regulated
AL353622	-0.693798	0.00102678	down-regulated
AC144652	-0.70083	0.0420378	down-regulated
AC004832	-0.702844	0.0469034	down-regulated
AC254562	-0.703333	0.0143761	down-regulated
AL117382	-0.706012	0.0277982	down-regulated
AP003471	-0.714233	0.00647225	down-regulated
FLJ38576	-0.718765	0.0056114	down-regulated
AP000880	-0.723876	0.0117324	down-regulated
LINC00572	-0.72572	0.0218702	down-regulated
AC141273	-0.725885	0.0262305	down-regulated
PCOLCE-AS1	-0.725971	0.0260101	down-regulated
AC069224	-0.735706	0.00632454	down-regulated
AC244100	-0.745278	9.29e-06	down-regulated
AC016044	-0.747593	8.87e-06	down-regulated
STPG3-AS1	-0.751726	0.0148753	down-regulated
AL009178	-0.754044	0.035822	down-regulated
AC004381	-0.754058	0.0404154	down-regulated
NDUFA6-DT	-0.757682	0.00251905	down-regulated
AL138902	-0.758161	0.0152772	down-regulated
AL356740	-0.760514	0.00132023	down-regulated
FLJ46906	-0.760613	0.0062574	down-regulated
AC021074	-0.765427	0.00397232	down-regulated
AC083841	-0.766235	0.000772224	down-regulated
DHRS4-AS1	-0.770634	1.56e-06	down-regulated
AC093797	-0.778174	0.00170895	down-regulated
AL133279	-0.786029	0.0432978	down-regulated
LINC01127	-0.791679	3.77e-05	down-regulated
SPATA41	-0.793967	0.00855597	down-regulated
AC104785	-0.794101	0.00171015	down-regulated
AP000892	-0.795851	0.0101313	down-regulated
LINC02538	-0.796167	0.00618097	down-regulated
LINC02499	-0.797546	0.000108369	down-regulated
AC097639	-0.79868	7.1e-06	down-regulated
AC135586	-0.802862	0.000255855	down-regulated
AL445423	-0.80532	0.000181717	down-regulated
DKFZp779M0652	-0.806432	0.0365316	down-regulated
LINC01780	-0.816476	0.000293136	down-regulated
AC008537	-0.8194	3e-05	down-regulated
LINC01352	-0.820107	0.000265731	down-regulated
LINC01767	-0.823685	0.0013535	down-regulated
HLX-AS1	-0.827926	0.0128445	down-regulated
LINC02292	-0.836017	0.000477538	down-regulated
LINC02197	-0.838822	0.0253157	down-regulated
AC139100	-0.840047	0.00521331	down-regulated
SOX9-AS1	-0.8473	0.0271487	down-regulated
AC006460	-0.847693	0.039621	down-regulated
SLC6A1-AS1	-0.849776	0.0293959	down-regulated
C3orf67-AS1	-0.851882	0.00304015	down-regulated
AC079630	-0.853146	0.00532709	down-regulated
AC024600	-0.853688	0.0482808	down-regulated
AC243836	-0.857765	0.000803281	down-regulated
AC132938	-0.863363	0.0346693	down-regulated
LINC00240	-0.865159	0.000319826	down-regulated
CTD-3080P12	-0.865469	0.00395798	down-regulated
GLIS2-AS1	-0.866017	0.00958293	down-regulated
DOCK9-AS1	-0.870078	0.0010178	down-regulated
LINC02068	-0.880177	0.0128445	down-regulated
ADORA2A-AS1	-0.883972	2.81e-07	down-regulated
AC068631	-0.887946	2.38e-07	down-regulated
ELFN2	-0.889086	0.00355537	down-regulated
ELOVL2-AS1	-0.891127	0.000477538	down-regulated
MLIP-IT1	-0.894342	0.0333322	down-regulated
LINC01146	-0.895231	0.00253799	down-regulated
LINC01093	-0.896134	0.00648452	down-regulated
MIR122HG	-0.904937	5.13e-06	down-regulated
LINC00671	-0.906279	4.08e-06	down-regulated
LINC00365	-0.907266	0.00213775	down-regulated
AC126614	-0.913325	0.00121751	down-regulated
Z73429	-0.916502	0.0262079	down-regulated
AC010205	-0.917697	0.000231482	down-regulated
AC122713	-0.920198	0.000119776	down-regulated
RRS1-AS1	-0.940148	0.00206767	down-regulated
F10-AS1	-0.941579	0.0003882	down-regulated
MAPT-IT1	-0.943514	0.000779206	down-regulated
LINC02012	-0.948179	0.0010178	down-regulated
AC092068	-0.952161	0.0462303	down-regulated
AC005962	-0.962621	0.000787092	down-regulated
AC091043	-0.972827	9.9e-06	down-regulated
AC007950	-0.974276	0.0195015	down-regulated
AL451060	-0.976479	0.000803258	down-regulated
AC063919	-0.976865	0.0013535	down-regulated
AL512288	-0.977944	0.0235105	down-regulated
AC010235	-0.97916	0.0163245	down-regulated
AC112219	-0.980242	0.0057376	down-regulated
AL163636	-0.98521	2.89e-06	down-regulated
LINC02028	-0.985571	7.59e-06	down-regulated
AC012409	-0.990839	0.0234885	down-regulated
AL590822	-0.994542	0.0147991	down-regulated
LINC01558	-0.996951	0.000775239	down-regulated
AL445686	-1.00967	0.0013535	down-regulated
AC080129	-1.01805	0.00226571	down-regulated
AL353148	-1.01822	0.028853	down-regulated
AP000355	-1.03155	9.29e-06	down-regulated
LINC01451	-1.0382	0.00251851	down-regulated
AC008946	-1.04096	1.21e-07	down-regulated
AL136526	-1.04472	0.0165976	down-regulated
LRRC3-DT	-1.04946	0.000231482	down-regulated
AC104129	-1.05234	0.0032393	down-regulated
AC021242	-1.05325	0.0038067	down-regulated
AP001065	-1.05445	2.27e-06	down-regulated
AC009166	-1.06132	4.33e-05	down-regulated
AL365259	-1.06233	0.0344786	down-regulated
AL033527	-1.06393	0.0262035	down-regulated
AC073573	-1.0708	0.00471937	down-regulated
AC137056	-1.08042	2.61e-05	down-regulated
AC022809	-1.10549	2.44e-05	down-regulated
DNMBP-AS1	-1.10756	0.00101363	down-regulated
AC063976	-1.11128	0.0293519	down-regulated
AC007298	-1.11161	0.000482267	down-regulated
HAO2-IT1	-1.1287	0.00192314	down-regulated
AC113146	-1.13308	0.0383184	down-regulated
AP005057	-1.14336	0.000802505	down-regulated
LINC00885	-1.14556	0.000428627	down-regulated
AC073321	-1.15262	0.00920366	down-regulated
AC019183	-1.15502	0.0152165	down-regulated
LINC02362	-1.16605	0.00104778	down-regulated
LINC01070	-1.16682	0.042543	down-regulated
AC112206	-1.17834	0.0149172	down-regulated
LINC00870	-1.18058	2.23e-06	down-regulated
LINC02156	-1.1908	0.0380279	down-regulated
LINC02073	-1.1918	0.0422552	down-regulated
AL133467	-1.21209	0.00012224	down-regulated
LINC01818	-1.2231	0.00703333	down-regulated
AL590079	-1.22959	0.00265743	down-regulated
AL109933	-1.23395	0.00700294	down-regulated
AC119424	-1.23822	0.000561655	down-regulated
LINC01182	-1.23873	0.0218702	down-regulated
LINC00222	-1.25528	3.7e-06	down-regulated
RNU6ATAC35P	-1.25837	4.87e-06	down-regulated
LINC01620	-1.26155	0.00302928	down-regulated
AL360181	-1.27655	9.56e-05	down-regulated
AC135584	-1.27845	0.0453593	down-regulated
LINC02584	-1.28818	0.00029804	down-regulated
AC021483	-1.2976	1.45e-05	down-regulated
DBH-AS1	-1.30041	1.66e-08	down-regulated
AC006037	-1.32347	1.46e-05	down-regulated
AL023755	-1.3286	0.000233377	down-regulated
AP001059	-1.36053	1.63e-05	down-regulated
AL139161	-1.36547	6.4e-05	down-regulated
LINC01018	-1.36605	3.27e-05	down-regulated
FAM99A	-1.36756	3.63e-06	down-regulated
LINC02200	-1.36981	9.4e-05	down-regulated
AC000032	-1.37121	0.0265236	down-regulated
AC007326	-1.39818	0.00916998	down-regulated
AC012379	-1.4053	0.0342659	down-regulated
AL033380	-1.41481	0.00320634	down-regulated
AC062004	-1.47572	0.00322648	down-regulated
ERLNC1	-1.48173	4.61e-05	down-regulated
AL162412	-1.48211	9.38e-07	down-regulated
AC116025	-1.4883	0.00239291	down-regulated
LINC00402	-1.51421	0.000231482	down-regulated
LINC01900	-1.51802	0.00260516	down-regulated
Z97056	-1.52169	0.00103813	down-regulated
FAM99B	-1.535	1.51e-05	down-regulated
MIR217HG	-1.57803	0.00329146	down-regulated
LINC00880	-1.58298	0.00392106	down-regulated
AC108748	-1.59743	4e-08	down-regulated
AC009185	-1.5997	9.14e-05	down-regulated
AL022314	-1.63062	0.0030479	down-regulated
AL353693	-1.6332	0.00392106	down-regulated
MIR4290HG	-1.65795	0.0147685	down-regulated
LINC01831	-1.6911	7.15e-05	down-regulated
LINC02453	-1.74385	4.45e-11	down-regulated
LINC00605	-1.80499	0.000123171	down-regulated
IGF2BP2-AS1	-1.84553	0.00617425	down-regulated
UPP2-IT1	-1.92505	0.00703333	down-regulated
AP001783	-1.98929	3.78e-07	down-regulated
AC024651	-2.00067	0.00253011	down-regulated
JAKMIP2-AS1	-2.05627	1.2e-05	down-regulated
AC015689	-2.09247	0.0107367	down-regulated
MLIP-AS1	-2.13499	5.62e-06	down-regulated
AL121827	-2.15802	7.34e-05	down-regulated
LINC02160	-2.30354	0.0468778	down-regulated
AL118523	-2.31377	0.00186763	down-regulated
AC021744	-2.37868	3.24e-05	down-regulated
AC092071	-2.48333	1.38e-08	down-regulated
AC005180	-2.86163	0.011268	down-regulated
