# Supplementary material for: Hypoxia associated multi-omics molecular landscape of tumor tissue in patients with hepatocellular carcinoma
Source: Aging (Albany NY). 2021 Mar 10;13(5):6525–53. doi: 10.18632/aging.202723 (PMC7993683; doi:10.18632/aging.202723)
Supplement: Supplementary Table 8 [file aging-13-202723-s008.xlsx]

## Sheet: Table S8
Supplementary Table 8. Survival analysis for differential expressed lncRNAs in TCGA-LIHC
Gene	log-rank P value	factor	HR	up95	low95
LINC01093	0.0357277	protect	0.691195	0.975135	0.489933
LINC01818	0.304742	risk	0.835188	1.17793	0.592174
HAO2-IT1	0.0625963	protect	0.722238	1.01943	0.511685
C17orf82	0.839281	protect	1.03609	1.46208	0.734214
LINC01767	0.466056	protect	0.880278	1.24232	0.623743
LINC02160	0.89881	risk	1.02322	1.46038	0.716926
AC012409	0.0489482	protect	0.708291	0.999613	0.501871
LINC00885	0.0371795	protect	0.694958	0.981445	0.492098
TMEM220-AS1	6.69e-06	protect	0.449145	0.6345	0.317938
AC024600	0.89042	protect	0.976187	1.37752	0.691782
AC079061	0.00283389	protect	0.591548	0.835082	0.419035
AC108748	0.98322	protect	0.99633	1.40512	0.706468
FAM99B	0.0242971	protect	0.67538	0.95376	0.478253
FAM99A	0.0119365	protect	0.644924	0.910966	0.456578
AC135584	0.284244	protect	0.829201	1.16963	0.587858
AL590079	0.0385658	protect	0.697075	0.984389	0.493619
PTGES2-AS1	0.739237	risk	1.06006	1.49592	0.751191
AC112206	0.0835675	protect	0.737778	1.04063	0.523064
MAFG-DT	0.0237924	risk	1.48451	2.09648	1.05117
SMIM25	0.668969	protect	1.07764	1.51982	0.764115
TMEM26-AS1	0.840521	risk	1.03586	1.46095	0.734458
AL358216	0.232135	risk	1.24545	1.81346	0.855358
DHRS4-AS1	0.0660918	protect	0.724651	1.02247	0.513581
LINC02156	0.661975	protect	1.07963	1.52262	0.765526
AC135586	0.237986	protect	0.813848	1.1484	0.576755
MIR4435-2HG	0.0880077	risk	1.34783	1.90189	0.955177
AGAP1-IT1	0.0417782	risk	1.43071	2.01827	1.0142
LINC02362	0.00425442	protect	0.605106	0.853989	0.428757
AC012379	0.0829355	protect	0.737808	1.04087	0.522985
AC004816	0.00036861	risk	1.86907	2.64143	1.32254
WDFY3-AS2	0.977912	risk	1.00486	1.41715	0.712515
AC011005	0.504624	risk	1.12342	1.58485	0.79633
AL353693	0.0428241	risk	0.694223	0.980286	0.491638
LINC01831	0.612032	protect	1.09301	1.54155	0.774985
LINC01679	0.314169	protect	0.839461	1.18495	0.594705
AC119424	0.19093	protect	0.794856	1.12099	0.563604
LINC01018	0.0458402	protect	0.704405	0.99364	0.499362
AL161645	0.0433586	protect	0.699682	0.986769	0.496118
LINC00628	0.488757	risk	1.12797	1.59177	0.799314
AL365259	0.895286	protect	0.977206	1.37894	0.692511
AP001065	0.0103402	protect	0.640543	0.905994	0.452868
AL353148	0.683215	risk	0.928014	1.32461	0.650161
HNF4A-AS1	0.00722154	protect	0.622691	0.878356	0.441444
AC073321	0.823319	protect	0.962024	1.35702	0.682001
AC122713	0.00914637	protect	0.633817	0.89508	0.448814
LEF1-AS1	0.201183	risk	1.2503	1.7646	0.8859
AC116025	0.00557433	protect	0.613378	0.86554	0.43468
PRR7-AS1	0.000395878	risk	1.85818	2.62743	1.31415
AL357079	0.117567	protect	1.31759	1.8582	0.934265
AL360219	0.882203	protect	0.974389	1.37437	0.690815
AC062004	0.171982	protect	0.786527	1.10926	0.557689
AC243836	0.321439	protect	0.840987	1.18708	0.595799
SNHG12	0.154032	risk	1.28294	1.81003	0.909342
LINC02028	0.0546879	protect	0.714114	1.00726	0.506284
AL158206	0.22651	risk	1.23588	1.7432	0.876197
LINC00365	0.712789	protect	0.937729	1.32254	0.664884
LINC02453	0.174722	protect	0.789459	1.11436	0.559283
AL158063	0.770757	risk	1.05217	1.48468	0.74566
AL133279	0.424851	protect	0.870201	1.22826	0.616521
AC010300	0.590554	protect	0.910106	1.28352	0.645329
AL133467	0.124139	protect	0.764158	1.07867	0.541347
AC087521	0.703274	protect	1.06882	1.50827	0.757411
AP001043	0.324068	protect	0.841972	1.18845	0.596506
SNHG3	0.024761	risk	1.48154	2.09132	1.04956
LINC01116	0.0337231	risk	1.45514	2.05227	1.03174
AL359915	0.0301005	protect	0.682588	0.962865	0.483896
ADAMTS9-AS2	0.14275	protect	0.774837	1.094	0.548789
LINC00402	0.0352819	protect	0.691765	0.976567	0.490021
AL133264	0.308212	risk	1.19573	1.6944	0.843817
AC009005	6.41e-05	risk	2.03153	2.86876	1.43864
LINC01186	0.945006	protect	1.01213	1.42755	0.717595
AC023590	0.54018	risk	1.11312	1.56997	0.789209
LINC01146	0.0220028	protect	0.67038	0.946808	0.474657
AL592424	0.824073	protect	1.03976	1.46655	0.737175
AL513218	0.0401256	risk	1.43047	2.01998	1.013
LINC01136	0.0588998	risk	1.39169	1.9638	0.986254
AC073611	0.0156105	risk	1.53185	2.16103	1.08586
OGFR-AS1	0.305256	risk	0.834877	1.17749	0.591954
AC097639	0.0615691	protect	0.722368	1.02113	0.511016
AC139100	0.0329933	protect	0.687848	0.97045	0.487542
AC010761	0.0741645	risk	1.3664	1.9291	0.967834
LINC01943	0.981437	protect	1.00407	1.41624	0.711857
LINC02499	0.00286818	protect	0.592271	0.83609	0.419554
MIR4290HG	0.127261	protect	0.765871	1.08069	0.542761
ELN-AS1	0.474314	protect	0.882446	1.24473	0.625608
LINC02313	0.00027074	risk	1.88484	2.66595	1.33259
AL163953	0.876854	risk	1.02748	1.45047	0.72785
AC110799	0.40157	risk	1.15816	1.63339	0.821197
ELF3-AS1	0.0192084	risk	1.51335	2.13442	1.07299
AC069224	0.908921	protect	1.02022	1.43882	0.723404
DHCR24-DT	0.0471244	risk	1.41296	1.99414	1.00117
AC007773	0.178558	risk	1.26593	1.78585	0.897378
INKA2-AS1	0.00131751	risk	1.75728	2.48095	1.24469
AC126614	0.0298348	protect	0.68392	0.965642	0.484389
ADAMTS9-AS1	0.425074	protect	0.86996	1.22752	0.61655
ITGA6-AS1	0.877732	protect	1.02731	1.44983	0.727931
AC245595	0.0267494	risk	1.47417	2.08009	1.04475
AC079630	0.0455237	protect	0.705285	0.996289	0.499279
LINC02197	0.822136	protect	0.961478	1.35597	0.681753
AC108058	0.683985	protect	0.931248	1.31362	0.660176
FBXL19-AS1	0.0333057	risk	1.45047	2.04773	1.02742
AL592166	0.425957	risk	1.14951	1.62157	0.814869
AC007298	0.569576	protect	0.905222	1.27671	0.641826
AC113383	0.222941	risk	1.2379	1.74586	0.877727
AC137056	0.812108	protect	0.959233	1.35281	0.68016
ELFN2	0.907456	risk	1.02057	1.43934	0.723645
AL109933	0.0045167	protect	0.604015	0.851841	0.428289
EHD4-AS1	0.766841	protect	0.949497	1.33923	0.673183
AP003471	0.388817	protect	0.860109	1.21305	0.609858
AC145423	0.00777426	risk	1.59071	2.2467	1.12626
LINC01451	0.538586	protect	0.898039	1.26713	0.636456
AC005632	0.633709	risk	1.08672	1.53263	0.770545
AC007998	0.00224264	risk	1.71662	2.42204	1.21665
LINC01127	0.0976686	protect	0.749087	1.05692	0.53091
LINC00511	0.011762	risk	1.55182	2.19323	1.098
LRRC3-DT	0.0115861	protect	0.644967	0.911531	0.456356
AC090192	0.000267211	risk	1.8711	2.6526	1.31985
FAM182B	0.00190812	risk	1.71967	2.43086	1.21655
AC007384	0.979332	protect	0.995476	1.40399	0.705825
AC009119	0.0983191	risk	1.33651	1.88503	0.947607
AC007292	0.28144	protect	0.828354	1.16869	0.587129
STPG3-AS1	0.06888	protect	0.727224	1.02606	0.515421
SPATA3-AS1	0.0534776	risk	1.4022	1.97878	0.993625
AL021392	0.107465	risk	1.3255	1.87066	0.939216
AC023090	0.20263	risk	1.25057	1.76379	0.886688
DGUOK-AS1	0.0226797	risk	1.49365	2.10681	1.05894
A1BG-AS1	0.00329114	protect	0.596752	0.842701	0.422586
AL049539	0.240381	risk	1.22712	1.73285	0.868983
AL162412	0.0381768	protect	0.696957	0.984728	0.493283
MAPT-IT1	0.433659	risk	0.871635	1.22928	0.618043
AL138828	0.405831	risk	1.15547	1.63253	0.817814
LINC01719	0.736936	risk	1.06035	1.49592	0.751603
AC024651	0.920681	risk	0.982753	1.38609	0.696783
SLC12A5-AS1	0.748843	risk	1.0577	1.49172	0.749965
PCAT6	0.0891868	risk	1.3456	1.90015	0.952887
LINC01558	0.226007	protect	0.80923	1.14236	0.573246
RHPN1-AS1	0.000191797	risk	1.91123	2.70222	1.35178
TTC39A-AS1	0.658185	protect	1.0806	1.52398	0.766213
AP005057	0.69316	protect	1.07164	1.51152	0.759774
AL139220	0.0272074	risk	1.47798	2.08442	1.04798
DDN-AS1	0.0789209	risk	1.35598	1.91605	0.959629
AC089983	0.00246618	risk	1.69417	2.39735	1.19725
LINC01780	0.597724	protect	0.911684	1.28575	0.646448
AC080129	0.168559	protect	0.786017	1.10918	0.55701
ACTN1-AS1	0.500437	risk	1.12511	1.58769	0.797307
AP001783	0.0315227	protect	0.685838	0.967935	0.485956
LINC01220	0.649973	risk	1.08267	1.5269	0.767677
FLJ46906	0.159706	protect	0.781253	1.10184	0.553941
LUCAT1	0.0182189	risk	1.50534	2.12756	1.06509
AL359313	0.0452005	risk	1.41699	2.00403	1.00191
MLIP-IT1	0.0838837	protect	0.738732	1.04217	0.523644
AC002378	0.00979772	risk	1.56548	2.22207	1.10291
C3orf67-AS1	0.989881	protect	0.997782	1.40717	0.707498
TNFRSF10A-AS1	0.892711	risk	0.976939	1.37806	0.692577
ZFPM2-AS1	0.000552372	risk	1.84342	2.60201	1.30599
LINC01485	0.239959	protect	0.81496	1.14946	0.577801
AC026250	0.000772357	risk	1.80376	2.54755	1.27712
AC137723	0.323419	risk	0.840625	1.18581	0.595923
AC034213	0.290654	protect	1.20278	1.69656	0.85271
AL358473	0.276882	risk	1.21004	1.70661	0.857952
DOCK9-AS1	0.199603	protect	0.800032	1.12835	0.567244
AL023755	0.325673	protect	0.841714	1.18719	0.596773
AL162741	0.340935	protect	0.84813	1.19638	0.601249
AC009166	0.00522849	protect	0.612923	0.865601	0.434005
AL139130	0.581131	risk	1.10063	1.55229	0.780384
AP000569	0.426114	protect	1.14957	1.62138	0.815052
HOXA-AS3	0.0159072	risk	1.52944	2.15761	1.08416
AC012486	0.661586	risk	1.07987	1.52984	0.762242
IGF2BP2-AS1	0.439038	risk	1.14504	1.61498	0.811851
AC026368	0.912924	risk	1.0192	1.4374	0.722676
Z93930	0.105502	protect	0.754091	1.06514	0.533875
LINC01341	0.318884	risk	0.83929	1.18365	0.595113
AC092756	0.703762	protect	1.06889	1.50766	0.757815
AP000593	0.234808	risk	1.23164	1.7372	0.87321
AC078850	0.172918	risk	1.26869	1.79163	0.89839
AL031665	0.407343	protect	1.156	1.63041	0.819625
AC131009	0.0725548	risk	1.37055	1.9337	0.971408
PCOLCE-AS1	0.107108	protect	0.754045	1.06386	0.534454
VAC14-AS1	0.231761	risk	1.23171	1.73808	0.872862
BBOX1-AS1	0.424762	risk	1.14999	1.62225	0.815206
AL445686	0.85798	risk	0.969175	1.36688	0.687186
LINC00920	0.138775	protect	0.771655	1.08878	0.546898
LINC01353	0.091654	risk	1.34457	1.89677	0.953136
CTD-3080P12	0.771501	protect	1.05222	1.48406	0.746046
AL442125	0.0275725	risk	1.47069	2.07581	1.04196
AC104088	0.973175	risk	0.994017	1.41154	0.699995
ELDR	0.0244686	risk	1.47697	2.08673	1.04539
AC254562	0.600234	risk	0.912992	1.28759	0.647376
AC005534	0.0733332	risk	1.36695	1.92989	0.968221
AL356124	0.590375	risk	1.09873	1.55186	0.777912
TM4SF1-AS1	0.479745	risk	1.13151	1.59602	0.802185
AP002478	0.00185141	risk	1.71216	2.43542	1.2037
GK-IT1	0.438905	protect	1.14566	1.61589	0.812268
AL391056	0.0418089	risk	1.42954	2.01712	1.01311
LINC00862	0.00869548	risk	1.58543	2.23729	1.1235
AP002847	0.00114125	risk	1.7757	2.50627	1.25809
LINC01410	0.833599	protect	1.03748	1.46319	0.735625
AC022893	0.191383	risk	1.25591	1.77204	0.890108
AC009974	0.849517	protect	0.967308	1.36426	0.685857
AC006460	0.23647	protect	0.812839	1.14669	0.576185
AC021074	0.13188	risk	0.769171	1.08487	0.545343
LINC01711	0.0544799	risk	1.39991	2.00691	0.976497
LINC01876	0.974181	risk	1.00567	1.4193	0.712578
AL353622	0.691807	risk	0.933073	1.31594	0.661599
RNF157-AS1	0.176989	risk	1.2664	1.78759	0.897171
AL139161	0.0506927	protect	0.71054	1.00246	0.503631
AC068196	0.0272396	risk	1.46355	2.07313	1.03322
DBH-AS1	0.0832215	protect	0.738777	1.04289	0.523348
AF064858	0.313604	protect	0.838678	1.18281	0.59467
AC011773	0.00222704	risk	1.69401	2.4291	1.18137
WASIR2	0.0592758	risk	1.39237	1.96424	0.98699
DLGAP1-AS2	0.95775	protect	1.00927	1.42354	0.715558
LINC01948	0.799851	risk	1.04488	1.47395	0.740718
AL078644	0.233514	risk	1.23179	1.73741	0.873316
AC068631	0.0196445	protect	0.665043	0.939391	0.470818
LINC02048	0.345483	risk	1.1791	1.66365	0.835685
AC009275	0.022494	risk	1.49195	2.10482	1.05753
NAV2-AS4	0.000120113	protect	0.515389	0.730757	0.363494
AC005962	0.832502	risk	0.963873	1.36015	0.683049
SPATA41	0.500321	protect	0.888702	1.25351	0.630066
AC011944	0.0438995	risk	1.42609	2.01139	1.01111
LINC01338	0.718854	risk	1.06705	1.52853	0.744894
DKFZp779M0652	0.02184	protect	0.669637	0.945345	0.474338
AC084117	0.411804	risk	1.15404	1.62801	0.81806
LINC01374	0.0655271	protect	0.725988	1.02466	0.514373
AC019183	0.105347	risk	1.32788	1.87405	0.94088
AC079906	0.54542	protect	0.89965	1.26908	0.637761
PSORS1C3	0.663322	risk	1.07927	1.52211	0.765273
AC008622	8.71e-06	risk	2.16967	3.07212	1.53232
TNRC6C-AS1	0.538012	protect	0.897861	1.26657	0.636484
AC016044	0.985287	protect	1.00324	1.41574	0.710929
LINC01091	0.749895	risk	1.05727	1.49126	0.749576
AC010524	0.41148	risk	1.15451	1.6291	0.818181
CASC8	0.218938	risk	1.24049	1.74953	0.879559
AC007099	0.433581	risk	1.14676	1.61857	0.812477
AL354993	0.923099	risk	1.01695	1.43541	0.720481
UNC5B-AS1	0.0193686	risk	1.50785	2.12665	1.06911
LINC01929	0.157147	risk	1.2825	1.8087	0.90938
AP001059	0.133095	protect	0.770938	1.08857	0.545988
AC022809	0.938883	protect	0.986674	1.39318	0.698777
AL356740	0.35719	protect	0.851332	1.20114	0.603398
AC012625	0.0278851	risk	1.46687	2.09471	1.02722
RNF144A-AS1	0.000180099	risk	1.94857	2.75011	1.38065
AC104129	0.176359	risk	0.785248	1.10926	0.555878
LINC00479	0.0899085	risk	1.34437	1.89934	0.951554
LINC00501	0.0842446	risk	1.3535	1.90997	0.959157
F10-AS1	0.463568	protect	0.879526	1.24046	0.623611
AC106897	0.0715394	risk	1.36941	1.9334	0.969933
NR2F1-AS1	0.964461	protect	0.99222	1.39962	0.703409
ERVK9-11	0.143808	risk	0.772694	1.09006	0.547729
LINC01436	0.305669	protect	1.19724	1.68846	0.848923
AC005540	0.0623102	risk	1.38386	1.95329	0.98043
HOTAIRM1	0.0321501	protect	0.686456	0.968502	0.486547
AC090116	0.303416	risk	0.822758	1.17955	0.573888
C1orf147	0.12981	risk	1.30405	1.8396	0.924405
AC037198	0.216434	risk	1.24068	1.75087	0.879153
NDUFA6-DT	0.064035	protect	0.722808	1.01989	0.512263
AC244100	0.539177	risk	1.11303	1.56984	0.789147
AL596223	0.482018	risk	1.13095	1.59601	0.801398
AC144652	0.952275	risk	1.01051	1.42523	0.716473
AL353803	0.0125911	risk	1.53608	2.18621	1.07929
AC087491	0.651321	risk	1.08803	1.58054	0.748993
AL033380	0.797039	risk	0.955959	1.3482	0.677834
SNHG6	0.397181	risk	1.15915	1.63527	0.821658
AC097358	0.0112579	risk	1.57059	2.29881	1.07306
AC116563	0.260145	risk	1.21872	1.73802	0.854577
LINC00865	0.391335	risk	1.16133	1.63787	0.823439
AC009093	0.281091	risk	1.20842	1.70424	0.856856
TBX2-AS1	0.377502	protect	0.856995	1.20867	0.607645
MIR217HG	0.442817	risk	1.14357	1.61289	0.810807
AC091868	0.165242	risk	1.27933	1.83451	0.89216
AC022092	0.128712	risk	1.30402	1.84341	0.92245
AC092964	0.0675218	risk	1.37593	1.94368	0.974023
AC097478	0.175446	risk	1.26683	1.78759	0.897775
AC079089	0.148082	risk	1.28756	1.81785	0.911962
MYOSLID	0.188542	risk	1.25871	1.77661	0.891788
MKLN1-AS	0.00054231	risk	1.81411	2.56952	1.28078
FLJ31356	0.621468	risk	1.0902	1.53771	0.772926
AC092071	0.224528	protect	0.808982	1.14129	0.573431
FP325331	0.241504	risk	1.22774	1.73198	0.870306
RRS1-AS1	0.0315865	protect	0.687753	0.970317	0.487474
AC093274	0.60439	risk	1.09447	1.54358	0.776026
LINC00941	0.24514	risk	1.22551	1.72983	0.868223
LINC00160	0.0207538	risk	1.50971	2.20271	1.03474
CASC15	0.00551654	risk	1.62318	2.29334	1.14886
LINC02154	0.00255204	risk	1.68285	2.40838	1.17589
AC114811	0.426091	risk	1.14933	1.62171	0.814544
LINC02003	1.57e-05	risk	2.10051	3.11018	1.41862
AL049836	0.5933	risk	1.10119	1.57732	0.768782
AL356215	0.457519	risk	1.13823	1.6064	0.806502
LINC00968	0.341689	risk	1.18173	1.67552	0.833468
LINC02389	0.0912239	risk	1.35047	1.94622	0.937078
AC026356	0.000864482	risk	1.80594	2.54852	1.27973
DARS-AS1	0.225552	risk	1.23541	1.74474	0.874765
AL451060	0.149106	protect	0.776763	1.09568	0.550672
AC007966	0.339061	risk	0.845662	1.19265	0.599626
SOX9-AS1	0.498411	protect	1.1261	1.58813	0.798481
AL117335	0.0074311	risk	1.60913	2.2695	1.14092
SPRY4-AS1	0.0204346	risk	1.50129	2.11875	1.06378
AL353150	0.519808	risk	1.11885	1.5793	0.792645
AC044781	0.462722	risk	1.13955	1.63241	0.795499
AL355596	0.0254948	risk	1.47877	2.12651	1.02834
AL033527	0.15615	protect	0.779648	1.09954	0.552826
AL109615	0.0196862	risk	1.53397	2.29773	1.02408
AC021744	0.812538	protect	0.959302	1.35291	0.68021
SNHG28	0.835643	protect	0.964401	1.36017	0.68379
NFIA-AS2	0.23894	risk	1.22878	1.73346	0.871038
IL21-AS1	0.817287	risk	1.04132	1.46923	0.73804
AC109826	0.403668	protect	0.86419	1.21914	0.612584
LINC02413	0.235297	risk	1.23005	1.73571	0.871698
AL121827	0.215917	protect	0.805388	1.13659	0.570699
LINC01479	0.236209	risk	1.25343	1.86641	0.84177
PRKG1-AS1	0.884494	risk	0.97465	1.37834	0.689194
FSIP2-AS1	0.642723	risk	1.08439	1.52974	0.768691
AC002454	0.898374	risk	1.02263	1.44225	0.725104
LINC00922	0.324735	risk	1.20169	1.75915	0.820889
AC040904	0.278915	risk	1.20784	1.70342	0.856443
AC013275	0.254412	risk	1.2209	1.72184	0.865694
HSD52	0.21478	risk	1.24623	1.78171	0.871676
ERICD	0.413869	risk	1.15403	1.62755	0.818273
AL590822	0.22893	protect	0.81194	1.14722	0.574649
AC027373	0.8383	risk	1.03641	1.46165	0.734888
LINC01900	0.181679	protect	0.792714	1.1189	0.561617
AC025580	0.0953888	risk	1.33823	1.88883	0.94813
AP005271	0.671016	risk	1.08331	1.57732	0.744026
SPACA6P-AS	0.41051	risk	1.15587	1.64475	0.812301
LINC02200	0.59472	risk	0.909464	1.28795	0.642201
AL138720	0.00412398	risk	1.64379	2.32999	1.15967
AC073072	0.223286	risk	0.806584	1.13772	0.571825
LINC02432	0.00752854	risk	1.59613	2.25448	1.13003
AL590004	0.0779086	risk	1.3612	1.92166	0.964198
AC090673	0.134859	risk	1.30011	1.85177	0.912791
CASC16	0.0445063	risk	1.41813	2.00326	1.0039
LINC-PINT	0.1958	risk	1.2536	1.7693	0.888205
AC026992	0.0130694	risk	1.53981	2.17593	1.08966
AC068189	0.199737	risk	1.25168	1.77289	0.883701
LINC02489	0.106029	risk	1.33512	1.92661	0.925222
AC099524	0.664522	risk	0.926811	1.30709	0.657167
AL023806	0.289411	protect	0.832233	1.17412	0.589901
ZNF341-AS1	0.658234	protect	1.08069	1.52423	0.766218
C10orf91	0.0139001	risk	1.54472	2.17887	1.09514
FLJ33534	0.486508	risk	1.12907	1.5939	0.799791
AC007255	0.499363	risk	0.887908	1.25272	0.629333
LINC02073	0.0509547	protect	0.711235	1.00372	0.503979
LINC02577	0.0119209	risk	1.54955	2.24392	1.07005
AC027117	0.787737	risk	0.953947	1.34601	0.676083
AL158166	0.0355727	risk	1.43918	2.03246	1.01907
AC005695	0.922088	risk	0.983046	1.3864	0.697043
AC002525	0.413323	protect	1.15436	1.62836	0.818334
DNAH17-AS1	0.0849598	protect	1.3537	1.90912	0.959865
AC010205	0.0172218	protect	0.658846	0.929936	0.466783
AC040970	0.0482195	risk	1.4169	1.99837	1.00462
SRGAP3-AS2	0.0111578	risk	1.58059	2.3347	1.07006
LUARIS	0.445846	risk	1.14281	1.61243	0.809964
AL162386	0.156039	risk	1.28201	1.80871	0.908689
AC018450	0.276796	protect	0.8291	1.17051	0.58727
ZDHHC20-IT1	0.416166	protect	0.867816	1.22453	0.615016
AC068594	0.422553	risk	1.15048	1.62267	0.815688
LINC01620	0.16348	protect	0.783151	1.10451	0.55529
LINC02538	0.837383	protect	0.964699	1.36148	0.683556
LINC01088	0.146309	risk	1.28933	1.81872	0.914042
KCNJ2-AS1	0.74951	protect	1.05757	1.49256	0.749353
IGFL2-AS1	0.213681	risk	1.24065	1.76002	0.874537
LINC02038	0.865056	protect	1.0301	1.4528	0.730379
ADORA2A-AS1	0.00800608	protect	0.628823	0.888136	0.445223
LINC02207	0.793617	protect	1.04693	1.47661	0.742275
LINC00239	0.577528	risk	1.10201	1.55479	0.781083
LINC00880	0.279806	protect	0.82847	1.17017	0.58655
LINC00958	0.0344367	risk	1.44279	2.04294	1.01895
SOX21-AS1	0.116411	risk	1.31521	1.85546	0.932259
Z98257	0.620107	risk	1.09037	1.53825	0.772903
LINC00462	0.0237672	risk	1.50604	2.22157	1.02097
LINC00605	0.550028	protect	0.900858	1.27058	0.638721
RPS6KA2-IT1	0.513722	risk	1.1238	1.60609	0.786331
AC005330	0.183556	risk	1.26301	1.78125	0.895555
AC131254	0.000203592	risk	1.91255	2.82386	1.29533
LINC02345	0.128269	risk	1.30486	1.84124	0.924741
MEF2C-AS1	0.772322	protect	0.950718	1.34197	0.673535
AC015689	0.15108	protect	1.28788	1.81634	0.913171
AP000577	0.147053	risk	1.28868	1.8182	0.91338
LINC01060	0.00132557	risk	1.74035	2.50376	1.20971
LINC01829	0.05377	risk	1.39957	1.97886	0.989858
SLC2A1-AS1	0.00114405	risk	1.77636	2.50722	1.25855
STXBP5-AS1	0.95481	protect	0.990117	1.39646	0.702013
LINC01352	0.199606	protect	0.798613	1.12652	0.566151
AC096720	0.949914	risk	1.01105	1.4262	0.716741
AL139147	0.106963	risk	1.35564	2.01964	0.909943
LINC00671	0.00604129	protect	0.619254	0.874844	0.438336
AC073333	0.0891797	risk	1.34414	1.89902	0.951398
AL163636	0.0133685	protect	0.645935	0.911118	0.457934
LINC02081	0.988121	protect	1.00261	1.41402	0.710896
AC021242	0.217197	risk	0.804857	1.13513	0.570678
RNU6ATAC35P	0.238829	protect	0.813744	1.14865	0.576483
AC020571	0.378772	risk	1.16579	1.6447	0.826325
AC016924	0.605558	risk	0.913425	1.2882	0.647683
LINC00336	0.040664	risk	1.42811	2.03687	1.00129
MIR181A2HG	0.210673	risk	1.24468	1.75606	0.882217
AC016026	0.470412	protect	0.881345	1.24302	0.624905
AC084083	0.0021774	risk	1.725	2.43336	1.22285
STK32A-AS1	0.794384	risk	1.04863	1.50341	0.731427
LINC02041	0.0913406	risk	1.34377	1.89562	0.952569
JAKMIP2-AS1	0.922851	protect	0.983196	1.38662	0.697146
AL451042	0.0212781	risk	1.49088	2.10562	1.05561
LINC00870	0.37838	risk	1.16721	1.64611	0.827632
AC125437	0.0138359	risk	1.54021	2.17292	1.09174
AP000355	0.170028	protect	0.787204	1.11033	0.558113
AC099560	0.341302	risk	1.20066	1.7803	0.809749
AL157395	0.36067	risk	1.17255	1.65482	0.830832
AL590560	0.239514	risk	1.22873	1.73291	0.871242
C1QTNF1-AS1	0.0565137	risk	1.39795	1.97179	0.991108
AC010457	0.256501	risk	1.21843	1.71849	0.863886
LINC01070	0.650516	risk	0.921435	1.30946	0.648391
HIF1A-AS1	0.760285	protect	0.948354	1.33749	0.672435
AC020916	0.765872	risk	1.05352	1.48594	0.746929
AC132938	0.037359	protect	0.694975	0.98104	0.492324
LINC00460	0.0791289	risk	1.38569	2.0544	0.93464
LINC00520	0.472328	risk	1.13596	1.61735	0.797857
LINC02292	0.426645	protect	0.869882	1.22681	0.616801
AC112219	0.381806	risk	0.853361	1.21089	0.601399
AF127936	0.60302	protect	1.09559	1.54615	0.776332
HLX-AS1	0.462318	risk	0.880006	1.24149	0.623777
AC097059	0.0845504	risk	1.35239	1.90787	0.958637
AC104785	0.0859506	protect	0.74019	1.04449	0.524545
DNMBP-AS1	0.0839879	protect	0.739899	1.0449	0.523926
LINC02601	0.318653	risk	1.19021	1.67858	0.843931
AP002852	0.0105383	risk	1.55716	2.22342	1.09054
AC104248	0.626957	risk	1.09025	1.55168	0.766039
AC106712	0.37317	risk	1.16858	1.64833	0.828463
LINC01638	0.117598	risk	1.3124	1.85197	0.930027
AL133297	0.981971	risk	0.996052	1.40493	0.706171
AL121578	0.779507	risk	1.0517	1.50068	0.737053
AL139005	0.430402	protect	1.14806	1.61993	0.813635
VWA8-AS1	0.199143	risk	0.798026	1.12548	0.565845
PICSAR	0.00078329	risk	1.79423	2.62047	1.2285
ZFAS1	0.694606	protect	0.933596	1.31673	0.661944
LINC00887	0.0783257	risk	1.36273	1.92218	0.966113
AC104211	0.00420993	protect	0.606623	0.856438	0.429676
AC078883	0.145777	risk	1.29133	1.82128	0.915581
PCAT7	0.399772	protect	0.862716	1.21672	0.611711
AL022329	0.39486	risk	1.1699	1.69985	0.805173
ROR1-AS1	0.0102188	risk	1.55989	2.2275	1.09237
AC011287	0.00367242	risk	1.66084	2.40613	1.1464
LINC00632	0.115842	risk	1.31528	1.86237	0.928899
AL023653	0.335105	protect	0.845422	1.19432	0.598447
LINC01993	0.189225	risk	1.2583	1.77502	0.892006
AC005180	0.804715	protect	0.957645	1.35088	0.678878
AC098613	0.165642	risk	1.27568	1.79914	0.904517
SLC6A1-AS1	0.046957	protect	0.706783	0.997508	0.50079
AL121787	0.169901	risk	1.2918	1.90893	0.874173
AC107021	0.357048	risk	1.17419	1.65666	0.832233
AL021154	0.167733	risk	1.27388	1.7968	0.903145
AC046143	0.820282	risk	0.960991	1.35531	0.681397
AL606534	0.070028	risk	1.37038	1.9348	0.970617
C1RL-AS1	0.0106395	protect	0.635912	0.89691	0.450863
CFAP58-DT	0.130224	risk	1.30335	1.83861	0.923914
AC098476	0.37093	risk	1.1909	1.7777	0.797798
LINC00540	0.229624	risk	1.23423	1.7412	0.874871
TMEM92-AS1	0.0346855	risk	1.44786	2.04323	1.02597
AL513283	0.625621	risk	1.08932	1.53914	0.770955
Z93241	0.422943	risk	1.15041	1.62379	0.815036
AC007490	0.80824	risk	0.958546	1.35198	0.679603
AL360181	0.0140137	protect	0.649513	0.916324	0.460391
LINC01303	0.423012	protect	1.15088	1.62309	0.816047
LIMS1-AS1	0.499382	risk	1.12514	1.59076	0.795812
AC074033	0.17236	risk	1.28558	1.88164	0.878342
LINC02454	0.154095	risk	1.30236	1.91385	0.886247
AL110115	0.0877061	risk	1.34316	1.8987	0.950165
LINC00243	0.945339	protect	0.988066	1.39348	0.700604
LINC02068	0.84362	protect	0.966173	1.36284	0.68496
AC002480	0.515512	risk	1.12059	1.58083	0.794338
AL353751	0.0157467	protect	1.53508	2.16493	1.08848
AC068700	0.101296	risk	1.34094	1.93968	0.927022
NRSN2-AS1	0.0894996	risk	1.34711	1.90037	0.954919
AL136526	0.797634	risk	1.04596	1.47513	0.741654
AL158151	0.501509	protect	1.12511	1.58705	0.797631
AC105446	0.117825	protect	1.31802	1.85889	0.934521
CASK-AS1	0.143831	risk	1.29092	1.82848	0.911404
MIR122HG	0.208383	protect	0.80187	1.13094	0.568551
AC067931	0.196225	risk	1.2544	1.76909	0.889454
AL606834	0.918317	risk	1.01809	1.43582	0.721884
AC141273	0.995201	protect	1.00105	1.412	0.709706
LINC01559	0.000156343	risk	1.93023	2.73168	1.36392
AC023825	0.836633	risk	0.96455	1.36049	0.683841
LINC01293	0.00656769	risk	1.60103	2.29644	1.1162
FLJ16779	0.195492	risk	1.25972	1.81135	0.876078
LINC00513	0.0150882	risk	1.52809	2.15906	1.08151
AC002540	0.00874004	risk	1.5747	2.24646	1.10382
AC007950	0.879591	protect	1.02687	1.4482	0.728126
AC114341	0.486229	risk	0.885512	1.24884	0.62789
LINC01094	0.11577	risk	1.31869	1.85981	0.93501
AC103770	0.0148534	risk	1.54033	2.24524	1.05673
AC044849	0.83139	risk	1.03794	1.46389	0.735926
AL118523	0.50851	risk	0.887615	1.25976	0.625406
AL359198	0.851223	risk	1.03331	1.45734	0.732657
AC006273	0.0649808	risk	1.38197	1.94996	0.979433
BLACAT1	0.151152	risk	1.28346	1.81379	0.908189
AC139749	0.39412	protect	1.16062	1.63714	0.822804
ITPKB-IT1	0.703985	risk	0.933447	1.32887	0.655686
AC013476	0.752151	protect	0.946342	1.33587	0.670396
RBPMS-AS1	0.799857	risk	1.04539	1.47432	0.741246
LINC02381	0.859619	protect	1.03145	1.45489	0.731255
LINC00222	0.919395	protect	1.01784	1.43557	0.721657
AC006037	0.0071918	protect	0.62559	0.884134	0.442651
AL096865	0.399264	risk	0.863076	1.21858	0.611284
MIR3142HG	0.756142	risk	1.05579	1.48983	0.748196
AC040174	0.030522	risk	1.48364	2.1923	1.00405
AC024940	0.974579	protect	1.00559	1.41838	0.712941
AC138207	0.139542	risk	1.29431	1.82578	0.91755
SLCO4A1-AS1	0.976801	risk	0.994931	1.40319	0.705456
FLJ22447	0.135995	protect	0.769915	1.08608	0.545787
AL691482	0.499826	risk	1.12421	1.58598	0.796892
HCFC1-AS1	0.430868	risk	1.15402	1.66374	0.800468
AC092068	0.476724	risk	1.13345	1.6081	0.7989
AL391497	0.0294195	protect	0.68254	0.963333	0.483592
AC004069	0.784658	risk	0.953228	1.34445	0.675848
AC090772	0.221788	protect	0.807711	1.13929	0.572637
AC017076	0.105918	risk	1.3266	1.87126	0.940478
AC040160	0.572821	protect	0.906105	1.27841	0.642224
AC007613	0.402254	protect	0.863447	1.21775	0.61223
AP000892	0.126724	risk	0.764074	1.07758	0.54178
AL009178	0.538995	protect	0.898022	1.26649	0.636755
AP003031	0.559554	protect	0.903018	1.27361	0.640258
AC074011	0.663716	risk	1.0789	1.52171	0.764952
TBC1D22A-AS1	0.760812	risk	0.94545	1.35791	0.658275
LINC00443	0.506969	risk	1.13914	1.69945	0.763569
PPFIA2-AS1	0.472539	risk	1.13526	1.6143	0.798375
BOLA3-AS1	0.75438	protect	1.05632	1.48973	0.749003
LINC01358	0.697443	protect	0.934319	1.31767	0.662497
APCDD1L-DT	0.000674899	risk	1.82018	2.56987	1.2892
LINC00323	0.0852503	risk	1.35342	1.90897	0.959544
LINC01508	0.011897	risk	1.57062	2.31171	1.0671
AL445423	0.000345883	protect	0.532999	0.752875	0.377338
AC002401	0.00620211	risk	1.63161	2.4026	1.10803
AC113146	0.28485	risk	1.2045	1.70719	0.849827
LINC02391	0.644801	risk	1.08406	1.52901	0.768592
CASC19	0.0919182	risk	1.34023	1.89247	0.949145
AC073130	0.448461	risk	1.14179	1.61212	0.808683
AC004381	0.289894	risk	0.822851	1.17183	0.577799
AP000864	0.00121379	risk	1.75014	2.51415	1.21831
AL513327	0.251381	risk	1.22089	1.72322	0.864985
AC004130	0.760474	risk	1.05484	1.48767	0.747938
ERLNC1	0.0644098	protect	0.723277	1.02029	0.512725
IER3-AS1	0.122183	risk	1.30891	1.84701	0.927584
AC091043	0.218504	risk	1.23874	1.74761	0.878044
AC008537	0.177338	protect	0.789385	1.11359	0.559566
HRAT5	0.786259	risk	1.04844	1.47863	0.743408
AC005479	0.051514	risk	1.40242	1.98298	0.991835
FLJ38576	0.722376	protect	1.06431	1.50123	0.754548
AL133330	0.219904	risk	1.23985	1.76264	0.872117
AL365214	0.543251	protect	0.899107	1.26903	0.637015
AL162424	0.208772	risk	1.24651	1.75804	0.883813
DKFZP434K028	0.863833	protect	1.03046	1.4535	0.730548
AC009542	0.246581	protect	1.22634	1.72992	0.869354
LINC00240	0.777666	risk	1.05047	1.48162	0.744777
AC027319	0.015293	protect	1.5411	2.17386	1.09251
AL139423	0.000168013	risk	1.95768	2.76217	1.3875
C1orf195	0.00691761	risk	1.62004	2.38406	1.10087
AC107398	0.842	protect	0.965777	1.36203	0.684803
LINC01423	0.712182	risk	1.07379	1.58129	0.729172
ATP1B3-AS1	0.444447	risk	1.14288	1.61216	0.810204
MAP3K20-AS1	0.869157	protect	0.971644	1.37079	0.688723
AC129492	0.496169	risk	1.12619	1.58879	0.79828
GLIS2-AS1	0.0111406	protect	0.641134	0.905259	0.454072
AC009185	0.381385	protect	0.857885	1.21031	0.608081
LINC01619	0.874581	protect	1.02803	1.45009	0.728815
LINC01356	0.405048	risk	1.157	1.63175	0.820374
ASAP1-IT2	0.000556909	risk	1.84531	2.60379	1.30778
LINC00970	0.123803	risk	1.35334	2.05799	0.889962
AC079209	0.124286	risk	1.31015	1.84793	0.928869
CHRM3-AS2	0.0624711	protect	0.720703	1.01642	0.511023
AP000880	0.0844542	risk	1.35048	1.90715	0.956294
LNCSRLR	0.0123452	risk	1.5503	2.18878	1.09807
TBL1XR1-AS1	0.219001	risk	1.25341	1.82593	0.860406
AC007336	0.0149888	risk	1.53411	2.16484	1.08714
AC008946	0.765112	protect	0.949025	1.33915	0.67255
ELOVL2-AS1	0.650726	protect	0.924165	1.3037	0.655123
AC087588	0.891134	protect	0.976288	1.37729	0.692039
SNHG15	0.0899932	risk	1.3449	1.89836	0.952802
AL583722	0.0278191	risk	1.4735	2.07861	1.04455
AC004540	0.0574244	risk	1.39494	1.96844	0.988535
AL607028	0.602213	risk	0.912702	1.28724	0.647142
AC087620	0.489675	risk	1.1403	1.67711	0.775311
AC063976	0.293595	risk	0.831684	1.17292	0.589723
LINC01504	0.714815	protect	0.938121	1.32326	0.665077
TRPM2-AS	0.415979	risk	1.15142	1.624	0.816352
DUBR	0.726964	protect	1.06303	1.49943	0.753635
EGFR-AS1	0.124558	protect	0.764316	1.07852	0.541648
AL137793	0.894203	protect	0.977019	1.37806	0.692689
CD44-AS1	0.616501	risk	1.09128	1.53995	0.773332
AC010235	0.232233	protect	0.811763	1.14497	0.575524
LINC01473	0.0824797	protect	0.736417	1.0386	0.522155
ABALON	0.140746	risk	1.29409	1.8259	0.917178
AC027702	0.0108131	risk	1.56506	2.209	1.10883
AC083841	0.648661	protect	1.08319	1.52774	0.767993
LINC01119	0.67366	protect	0.929554	1.31197	0.658606
AC007569	0.454832	risk	1.13931	1.60795	0.807263
AC005476	0.474956	protect	0.882609	1.24496	0.625724
AC004832	0.213332	protect	0.80367	1.13341	0.569858
VLDLR-AS1	0.0297723	risk	1.46064	2.06442	1.03345
LINC02465	0.0387535	risk	1.43136	2.04772	1.00053
AL445471	0.0787565	risk	1.37404	2.00548	0.941417
AC110741	0.0472307	risk	1.41743	2.04482	0.982527
FUT8-AS1	0.663992	risk	1.0789	1.52158	0.765006
AC112722	0.257926	risk	1.21878	1.72021	0.863509
LINC00661	0.00179215	risk	1.71746	2.43537	1.21118
AL158825	0.147839	risk	1.28916	1.81846	0.913916
AC019069	0.0427776	risk	1.42657	2.0129	1.01103
AC019077	0.0495669	risk	1.413	1.99313	1.00172
AC140912	0.00631824	risk	1.61305	2.27877	1.14181
AL161938	0.000711831	risk	1.7909	2.55207	1.25676
AC091806	0.0158797	risk	1.53368	2.16299	1.08746
LINC00705	0.200586	risk	1.25869	1.81702	0.871915
AC010655	0.0844432	risk	1.34917	1.90527	0.955379
AC114760	0.96267	risk	0.991837	1.39881	0.703267
LINC02086	0.103367	protect	0.751239	1.05969	0.53257
AC007326	0.936929	risk	1.01393	1.42995	0.718941
AC021483	0.061812	protect	0.721512	1.01842	0.511164
AL117382	0.0196462	protect	0.663134	0.935407	0.470112
MIR222HG	0.852689	risk	0.967974	1.36534	0.686256
ITGB1-DT	0.0025711	risk	1.67154	2.36836	1.17974
AC068722	0.884283	risk	1.02691	1.47608	0.71442
AC087645	0.0980191	protect	1.33935	1.88891	0.949684
AL035665	0.659869	risk	0.925724	1.30588	0.656236
AC093797	0.105802	protect	0.753996	1.06356	0.534535
FOXP4-AS1	0.105651	risk	1.32652	1.87283	0.939572
AL359880	0.147823	risk	1.28734	1.81754	0.91181
AC083809	0.129111	risk	1.30429	1.83995	0.924576
LINC01503	0.00750304	risk	1.60263	2.26112	1.13591
NEBL-AS1	0.0728591	risk	1.38049	2.00554	0.950247
LINC01106	0.158519	risk	1.27875	1.80525	0.905809
AD000864	0.489399	protect	1.12912	1.59267	0.800485
AC019117	0.69587	risk	1.07062	1.5102	0.758994
NKILA	0.689009	protect	1.07276	1.51376	0.760228
AL157762	0.607121	risk	1.09408	1.54321	0.775662
AC132192	0.517947	risk	1.11852	1.5783	0.792681
AL022067	0.560778	risk	0.903531	1.2744	0.640591
AC156455	0.442563	risk	1.1438	1.61499	0.810085
C22orf34	0.28041	protect	1.20913	1.70548	0.857238
AC002076	0.100327	risk	1.34224	1.94605	0.925781
AC015799	0.858604	risk	1.03171	1.45526	0.731436
AC109809	0.00991769	protect	0.634307	0.894819	0.44964
AC000032	0.328852	risk	0.832346	1.19177	0.581319
AL137145	0.228834	risk	1.23373	1.74097	0.874283
LRP1-AS	0.0716538	risk	1.36827	1.93178	0.969143
Z73429	0.626155	protect	0.918187	1.29495	0.651043
AC073573	0.000256746	protect	0.524581	0.740792	0.371475
AL022314	0.218061	protect	0.80711	1.13867	0.572094
AL359740	0.701901	risk	1.06926	1.50962	0.757354
AC112491	0.571002	protect	1.10471	1.55847	0.783074
AC023449	0.945247	protect	1.0121	1.42751	0.717575
SNAP25-AS1	0.45194	risk	1.14078	1.60895	0.808842
AP004608	0.416607	protect	0.867433	1.22399	0.614743
AC018682	0.158364	risk	1.28025	1.80583	0.907638
AC015987	0.54891	protect	0.900477	1.27024	0.638351
AC107027	0.0177337	risk	1.51035	2.13478	1.06857
LINC01014	0.0858367	risk	1.37938	2.05121	0.927592
AC015853	0.843106	risk	1.0352	1.46051	0.733735
AC245297	0.777633	risk	1.05094	1.48666	0.742929
AC061992	0.0092324	risk	1.58011	2.2297	1.11976
AC022558	0.235127	risk	1.22932	1.73422	0.871414
KLHL30-AS1	0.358211	risk	1.17428	1.65728	0.832041
SNHG26	0.107151	risk	1.3239	1.86994	0.93731
TBILA	0.00822818	risk	1.58765	2.24129	1.12464
AC084082	0.0438083	protect	0.701776	0.989954	0.497487
AL590006	0.729076	protect	1.0626	1.49884	0.753333
AL022316	0.9402	risk	1.01323	1.42896	0.718445
AC009414	0.739911	protect	0.943594	1.33094	0.668977
AC008750	0.257235	risk	1.2168	1.71685	0.8624
HIF1A-AS2	0.834531	risk	1.03727	1.46286	0.735498
DLGAP1-AS1	0.675499	risk	1.07602	1.51762	0.762913
Z97056	0.17925	protect	0.790066	1.11425	0.560203
LINC02147	0.174195	risk	1.27151	1.81685	0.889856
LINC02012	0.856207	risk	0.968746	1.36627	0.686883
PIK3CD-AS2	0.192777	risk	1.25597	1.77213	0.890155
AC023154	0.671116	protect	0.929268	1.31157	0.658401
AC063919	0.0428478	protect	0.701004	0.988872	0.496936
PLAC4	0.188927	risk	1.25847	1.77569	0.891911
AC004264	0.244234	risk	1.22637	1.72973	0.86949
AL512288	0.015797	risk	0.642442	0.908056	0.454522
LHFPL3-AS2	0.0135131	risk	1.54705	2.18218	1.09678
AC131888	0.0974543	risk	1.33601	1.88567	0.946581
AC007285	0.469046	risk	1.13565	1.60834	0.801877
SLC8A1-AS1	0.553796	risk	1.10904	1.56419	0.786326
MLIP-AS1	0.483583	protect	0.884863	1.24797	0.627406
AL606763	0.0720165	risk	1.3698	1.93322	0.970583
AC087623	0.925965	risk	0.98387	1.38756	0.697626
ERVH48-1	0.211698	protect	0.803596	1.13336	0.569779
LINC00900	0.11223	protect	1.32358	1.86694	0.938358
LINC01433	0.0123965	risk	1.55464	2.26216	1.06841
AP000251	0.823711	risk	0.961595	1.35738	0.681214
OSMR-AS1	0.0896476	risk	1.34569	1.89884	0.953676
HOMER3-AS1	0.208026	protect	1.24784	1.76007	0.88468
DPYD-IT1	0.448535	risk	1.14207	1.61418	0.808043
AL049597	0.205715	protect	1.24918	1.76177	0.885736
LINC02576	0.37764	protect	0.85665	1.20818	0.6074
AP001033	0.263898	protect	0.822745	1.16032	0.583382
LINC02584	0.311622	risk	0.837411	1.181	0.593782
ARHGAP31-AS1	0.185737	risk	1.261	1.77885	0.893905
AC124798	0.0228733	risk	1.4929	2.10618	1.0582
STEAP2-AS1	0.576128	risk	1.10287	1.55568	0.781864
LINC00572	0.985308	risk	0.996581	1.43581	0.691718
CR786580	0.0356917	risk	1.44328	2.06563	1.00843
LINC01587	0.0419587	protect	1.43343	2.02158	1.01639
DANCR	2.63e-05	risk	2.09672	2.9642	1.48311
AP001381	0.0724058	risk	1.36794	1.94092	0.964108
AC007608	0.591907	risk	1.09841	1.54967	0.778556
MIR210HG	0.000673222	risk	1.81825	2.56608	1.28836
UPP2-IT1	0.694006	risk	0.933495	1.31654	0.661898
TMEM51-AS1	0.680831	protect	1.07462	1.51556	0.761968
AL133230	0.923665	risk	1.01684	1.43442	0.720819
AC010980	0.24363	risk	1.2264	1.72962	0.869592
AC105285	0.542782	protect	1.11264	1.56931	0.788865
AL138902	0.918905	risk	0.982363	1.38543	0.69656
GLIS3-AS1	0.543692	risk	1.11542	1.59608	0.779512
FOXD3-AS1	0.719167	risk	0.935234	1.34511	0.650255
WWTR1-IT1	0.273673	risk	1.2142	1.73377	0.850333
LINC01068	0.0695479	risk	1.37036	1.94447	0.965762
HCG14	0.53442	protect	0.897302	1.2661	0.635929
LINC01182	0.315065	risk	1.19276	1.68218	0.845734
