# Supplementary material for: Hypoxia associated multi-omics molecular landscape of tumor tissue in patients with hepatocellular carcinoma
Source: Aging (Albany NY). 2021 Mar 10;13(5):6525–53. doi: 10.18632/aging.202723 (PMC7993683; doi:10.18632/aging.202723)
Supplement: Supplementary Table 9 [file aging-13-202723-s009.xlsx]

## Sheet: Table S9
Supplementary Table 9. Significant difference in CNAs events between high hypoxia score and low hypoxia score groups in TCGA-LIHC
			high hypoxia score			low hypoxia score
Gene	chi-square	ip value	Gain	Loss	Nutral	Gain	Loss	nutral
CRY2	13.983	0.000919655	0.119565	0.23913	0.641304	0.0333333	0.0888889	0.877778
MAPK8IP1	13.983	0.000919655	0.119565	0.23913	0.641304	0.0333333	0.0888889	0.877778
C11orf94	13.983	0.000919655	0.119565	0.23913	0.641304	0.0333333	0.0888889	0.877778
PEX16	13.983	0.000919655	0.119565	0.23913	0.641304	0.0333333	0.0888889	0.877778
RNF43	13.9081	0.000954745	0.380435	0.119565	0.5	0.177778	0.0555556	0.766667
HSF5	13.9081	0.000954745	0.380435	0.119565	0.5	0.177778	0.0555556	0.766667
NOL11	13.4162	0.00122099	0.413043	0.119565	0.467391	0.211111	0.0555556	0.733333
SNORA38B	13.4162	0.00122099	0.413043	0.119565	0.467391	0.211111	0.0555556	0.733333
BPTF	13.4162	0.00122099	0.413043	0.119565	0.467391	0.211111	0.0555556	0.733333
RN7SL622P	13.4162	0.00122099	0.413043	0.119565	0.467391	0.211111	0.0555556	0.733333
C17orf58	13.4162	0.00122099	0.413043	0.119565	0.467391	0.211111	0.0555556	0.733333
KPNA2	13.4162	0.00122099	0.413043	0.119565	0.467391	0.211111	0.0555556	0.733333
PITPNC1	13.2922	0.00129908	0.423913	0.119565	0.456522	0.222222	0.0555556	0.722222
SLC39A11	13.1363	0.00140436	0.423913	0.130435	0.445652	0.222222	0.0666667	0.711111
SRSF1	12.8971	0.00158282	0.380435	0.108696	0.51087	0.177778	0.0555556	0.766667
DYNLL2	12.8971	0.00158282	0.380435	0.108696	0.51087	0.177778	0.0555556	0.766667
OR4D1	12.8971	0.00158282	0.380435	0.108696	0.51087	0.177778	0.0555556	0.766667
OR4D2	12.8971	0.00158282	0.380435	0.108696	0.51087	0.177778	0.0555556	0.766667
EPX	12.8971	0.00158282	0.380435	0.108696	0.51087	0.177778	0.0555556	0.766667
MKS1	12.8971	0.00158282	0.380435	0.108696	0.51087	0.177778	0.0555556	0.766667
LPO	12.8971	0.00158282	0.380435	0.108696	0.51087	0.177778	0.0555556	0.766667
MPO	12.8971	0.00158282	0.380435	0.108696	0.51087	0.177778	0.0555556	0.766667
BZRAP1	12.8971	0.00158282	0.380435	0.108696	0.51087	0.177778	0.0555556	0.766667
MIR142	12.8971	0.00158282	0.380435	0.108696	0.51087	0.177778	0.0555556	0.766667
MIR4736	12.8971	0.00158282	0.380435	0.108696	0.51087	0.177778	0.0555556	0.766667
SUPT4H1	12.8971	0.00158282	0.380435	0.108696	0.51087	0.177778	0.0555556	0.766667
MTMR4	12.8971	0.00158282	0.380435	0.108696	0.51087	0.177778	0.0555556	0.766667
X4.Sep	12.8971	0.00158282	0.380435	0.108696	0.51087	0.177778	0.0555556	0.766667
C17orf47	12.8971	0.00158282	0.380435	0.108696	0.51087	0.177778	0.0555556	0.766667
TEX14	12.8971	0.00158282	0.380435	0.108696	0.51087	0.177778	0.0555556	0.766667
U3.ENSG00000212195.1	12.8971	0.00158282	0.380435	0.108696	0.51087	0.177778	0.0555556	0.766667
RAD51C	12.8971	0.00158282	0.380435	0.108696	0.51087	0.177778	0.0555556	0.766667
SLC35C1	12.8793	0.00159699	0.108696	0.23913	0.652174	0.0333333	0.0888889	0.877778
GYLTL1B	12.8793	0.00159699	0.108696	0.23913	0.652174	0.0333333	0.0888889	0.877778
ACP2	12.8348	0.00163293	0.0978261	0.25	0.652174	0.0333333	0.0888889	0.877778
NR1H3	12.8348	0.00163293	0.0978261	0.25	0.652174	0.0333333	0.0888889	0.877778
ABCA6	12.7273	0.00172307	0.423913	0.108696	0.467391	0.2	0.0777778	0.722222
MIR4524B	12.7273	0.00172307	0.423913	0.108696	0.467391	0.2	0.0777778	0.722222
SKA2	12.7032	0.00174399	0.391304	0.108696	0.5	0.188889	0.0555556	0.755556
MIR454	12.7032	0.00174399	0.391304	0.108696	0.5	0.188889	0.0555556	0.755556
MIR301A	12.7032	0.00174399	0.391304	0.108696	0.5	0.188889	0.0555556	0.755556
DHX40	12.7032	0.00174399	0.391304	0.108696	0.5	0.188889	0.0555556	0.755556
CLTC	12.7032	0.00174399	0.391304	0.108696	0.5	0.188889	0.0555556	0.755556
PTRH2	12.7032	0.00174399	0.391304	0.108696	0.5	0.188889	0.0555556	0.755556
C17orf64	12.7032	0.00174399	0.391304	0.108696	0.5	0.188889	0.0555556	0.755556
RPL12P38	12.7032	0.00174399	0.391304	0.108696	0.5	0.188889	0.0555556	0.755556
VMP1	12.6362	0.0018034	0.380435	0.130435	0.48913	0.2	0.0555556	0.744444
ARSG	12.5356	0.0018964	0.434783	0.0978261	0.467391	0.211111	0.0666667	0.722222
SLC16A6	12.5356	0.0018964	0.434783	0.0978261	0.467391	0.211111	0.0666667	0.722222
PRKAR1A	12.5356	0.0018964	0.434783	0.0978261	0.467391	0.211111	0.0666667	0.722222
WIPI1	12.5356	0.0018964	0.434783	0.0978261	0.467391	0.211111	0.0666667	0.722222
YPEL2	12.5313	0.00190051	0.402174	0.108696	0.48913	0.2	0.0555556	0.744444
TUBD1	12.5313	0.00190051	0.402174	0.108696	0.48913	0.2	0.0555556	0.744444
RPS6KB1	12.5313	0.00190051	0.402174	0.108696	0.48913	0.2	0.0555556	0.744444
RNFT1	12.5313	0.00190051	0.402174	0.108696	0.48913	0.2	0.0555556	0.744444
HEATR6	12.5313	0.00190051	0.402174	0.108696	0.48913	0.2	0.0555556	0.744444
MIR4737	12.5313	0.00190051	0.402174	0.108696	0.48913	0.2	0.0555556	0.744444
MIR548D2	12.4152	0.00201403	0.402174	0.119565	0.478261	0.211111	0.0555556	0.733333
CACNG5	12.3795	0.00205032	0.413043	0.108696	0.478261	0.211111	0.0555556	0.733333
LINC00674	12.3795	0.00205032	0.413043	0.108696	0.478261	0.211111	0.0555556	0.733333
LRRC37A16P	12.3795	0.00205032	0.413043	0.108696	0.478261	0.211111	0.0555556	0.733333
ABCA8	12.3575	0.00207297	0.423913	0.108696	0.467391	0.211111	0.0666667	0.722222
ABCA9	12.3575	0.00207297	0.423913	0.108696	0.467391	0.211111	0.0666667	0.722222
ABCA10	12.3575	0.00207297	0.423913	0.108696	0.467391	0.211111	0.0666667	0.722222
ABCA5	12.3575	0.00207297	0.423913	0.108696	0.467391	0.211111	0.0666667	0.722222
SNORA40.ENSG00000252352.1	12.3575	0.00207297	0.423913	0.108696	0.467391	0.211111	0.0666667	0.722222
MAP2K6	12.3575	0.00207297	0.423913	0.108696	0.467391	0.211111	0.0666667	0.722222
KCNJ16	12.2463	0.00219155	0.423913	0.108696	0.467391	0.222222	0.0555556	0.722222
KCNJ2	12.2463	0.00219155	0.423913	0.108696	0.467391	0.222222	0.0555556	0.722222
SSTR2	12.2122	0.00222923	0.434783	0.108696	0.456522	0.222222	0.0666667	0.711111
COG1	12.2122	0.00222923	0.434783	0.108696	0.456522	0.222222	0.0666667	0.711111
FAM104A	12.2122	0.00222923	0.434783	0.108696	0.456522	0.222222	0.0666667	0.711111
C17orf80	12.2122	0.00222923	0.434783	0.108696	0.456522	0.222222	0.0666667	0.711111
CPSF4L	12.2122	0.00222923	0.434783	0.108696	0.456522	0.222222	0.0666667	0.711111
CDC42EP4	12.2122	0.00222923	0.434783	0.108696	0.456522	0.222222	0.0666667	0.711111
SDK2	12.2122	0.00222923	0.434783	0.108696	0.456522	0.222222	0.0666667	0.711111
RN7SKP180	12.1348	0.00231724	0.423913	0.119565	0.456522	0.222222	0.0666667	0.711111
SCARNA24.ENSG00000252274.1	12.1348	0.00231724	0.423913	0.119565	0.456522	0.222222	0.0666667	0.711111
SUMO2	12.1302	0.0023225	0.434783	0.108696	0.456522	0.233333	0.0555556	0.711111
NUP85	12.1302	0.0023225	0.434783	0.108696	0.456522	0.233333	0.0555556	0.711111
GGA3	12.1302	0.0023225	0.434783	0.108696	0.456522	0.233333	0.0555556	0.711111
MRPS7	12.1302	0.0023225	0.434783	0.108696	0.456522	0.233333	0.0555556	0.711111
MIF4GD	12.1302	0.0023225	0.434783	0.108696	0.456522	0.233333	0.0555556	0.711111
SLC25A19	12.1302	0.0023225	0.434783	0.108696	0.456522	0.233333	0.0555556	0.711111
CA10	12.1161	0.002339	0.369565	0.108696	0.521739	0.166667	0.0666667	0.766667
RNF126P1	12.1161	0.002339	0.369565	0.108696	0.521739	0.166667	0.0666667	0.766667
AKAP1	12.1161	0.002339	0.369565	0.108696	0.521739	0.166667	0.0666667	0.766667
CALCOCO2	11.9693	0.00251711	0.358696	0.119565	0.521739	0.166667	0.0666667	0.766667
SCARNA20.ENSG00000251818.1	11.9313	0.00256536	0.304348	0.130435	0.565217	0.122222	0.0777778	0.8
SNORA70.ENSG00000202389.1	11.9313	0.00256536	0.304348	0.130435	0.565217	0.122222	0.0777778	0.8
Vault.ENSG00000252283.1	11.9313	0.00256536	0.304348	0.130435	0.565217	0.122222	0.0777778	0.8
MSI2	11.8954	0.0026119	0.369565	0.108696	0.521739	0.177778	0.0555556	0.766667
RN7SL437P	11.8954	0.0026119	0.369565	0.108696	0.521739	0.177778	0.0555556	0.766667
RN7SL449P	11.8954	0.0026119	0.369565	0.108696	0.521739	0.177778	0.0555556	0.766667
RN7SKP94	11.8954	0.0026119	0.369565	0.108696	0.521739	0.177778	0.0555556	0.766667
MRPS23	11.8954	0.0026119	0.369565	0.108696	0.521739	0.177778	0.0555556	0.766667
PRDM11	11.8271	0.00270262	0.0978261	0.23913	0.663043	0.0333333	0.0888889	0.877778
SYT13	11.8271	0.00270262	0.0978261	0.23913	0.663043	0.0333333	0.0888889	0.877778
CHST1	11.8271	0.00270262	0.0978261	0.23913	0.663043	0.0333333	0.0888889	0.877778
PHF21A	11.8271	0.00270262	0.0978261	0.23913	0.663043	0.0333333	0.0888889	0.877778
CREB3L1	11.8271	0.00270262	0.0978261	0.23913	0.663043	0.0333333	0.0888889	0.877778
VEZF1	11.7117	0.00286317	0.380435	0.108696	0.51087	0.188889	0.0555556	0.755556
PPM1E	11.7117	0.00286317	0.380435	0.108696	0.51087	0.188889	0.0555556	0.755556
RN7SL716P	11.7117	0.00286317	0.380435	0.108696	0.51087	0.188889	0.0555556	0.755556
TRIM37	11.7117	0.00286317	0.380435	0.108696	0.51087	0.188889	0.0555556	0.755556
SCARNA20.ENSG00000252577.1	11.7117	0.00286317	0.380435	0.108696	0.51087	0.188889	0.0555556	0.755556
LEPREL4	11.6313	0.00298051	0.293478	0.152174	0.554348	0.122222	0.0888889	0.788889
FKBP10	11.6313	0.00298051	0.293478	0.152174	0.554348	0.122222	0.0888889	0.788889
NT5C3B	11.6313	0.00298051	0.293478	0.152174	0.554348	0.122222	0.0888889	0.788889
KLHL10	11.6313	0.00298051	0.293478	0.152174	0.554348	0.122222	0.0888889	0.788889
RN7SL871P	11.6313	0.00298051	0.293478	0.152174	0.554348	0.122222	0.0888889	0.788889
KLHL11	11.6313	0.00298051	0.293478	0.152174	0.554348	0.122222	0.0888889	0.788889
NLK	11.6227	0.00299341	0.315217	0.130435	0.554348	0.133333	0.0777778	0.788889
PYY2	11.6227	0.00299341	0.315217	0.130435	0.554348	0.133333	0.0777778	0.788889
PPY2	11.6227	0.00299341	0.315217	0.130435	0.554348	0.133333	0.0777778	0.788889
KRT18P55	11.6227	0.00299341	0.315217	0.130435	0.554348	0.133333	0.0777778	0.788889
RN7SL448P	11.5849	0.00305049	0.380435	0.119565	0.5	0.2	0.0555556	0.744444
PRR11	11.5487	0.00310616	0.391304	0.108696	0.5	0.2	0.0555556	0.744444
SMG8	11.5487	0.00310616	0.391304	0.108696	0.5	0.2	0.0555556	0.744444
GDPD1	11.5487	0.00310616	0.391304	0.108696	0.5	0.2	0.0555556	0.744444
MIR4729	11.5487	0.00310616	0.391304	0.108696	0.5	0.2	0.0555556	0.744444
MIR21	11.5487	0.00310616	0.391304	0.108696	0.5	0.2	0.0555556	0.744444
CA4	11.5487	0.00310616	0.391304	0.108696	0.5	0.2	0.0555556	0.744444
USP32	11.5487	0.00310616	0.391304	0.108696	0.5	0.2	0.0555556	0.744444
AMZ2	11.5218	0.00314822	0.423913	0.0978261	0.478261	0.211111	0.0666667	0.722222
MIR635	11.5218	0.00314822	0.423913	0.0978261	0.478261	0.211111	0.0666667	0.722222
FAM20A	11.5218	0.00314822	0.423913	0.0978261	0.478261	0.211111	0.0666667	0.722222
DDB2	11.5084	0.00316947	0.0978261	0.25	0.652174	0.0444444	0.0888889	0.866667
CELF1	11.5084	0.00316947	0.0978261	0.25	0.652174	0.0444444	0.0888889	0.866667
C17orf51	11.4704	0.0032302	0.217391	0.304348	0.478261	0.1	0.177778	0.722222
FAM27L	11.4704	0.0032302	0.217391	0.304348	0.478261	0.1	0.177778	0.722222
MTND1P15	11.4704	0.0032302	0.217391	0.304348	0.478261	0.1	0.177778	0.722222
MTRNR2L1	11.4704	0.0032302	0.217391	0.304348	0.478261	0.1	0.177778	0.722222
UBBP4	11.4704	0.0032302	0.217391	0.304348	0.478261	0.1	0.177778	0.722222
RN7SL756P	11.4569	0.00325208	0.391304	0.119565	0.48913	0.211111	0.0555556	0.733333
ATG13	11.432	0.00329287	0.108696	0.23913	0.652174	0.0444444	0.0888889	0.866667
RNA5SP445	11.4048	0.00333802	0.402174	0.108696	0.48913	0.211111	0.0555556	0.733333
MIR634	11.4048	0.00333802	0.402174	0.108696	0.48913	0.211111	0.0555556	0.733333
RNA5SP446	11.4048	0.00333802	0.402174	0.108696	0.48913	0.211111	0.0555556	0.733333
CACNG1	11.4048	0.00333802	0.402174	0.108696	0.48913	0.211111	0.0555556	0.733333
HELZ	11.4048	0.00333802	0.402174	0.108696	0.48913	0.211111	0.0555556	0.733333
HLF	11.3244	0.00347482	0.369565	0.108696	0.521739	0.166667	0.0777778	0.755556
LINC00511	11.2195	0.00366196	0.423913	0.108696	0.467391	0.222222	0.0666667	0.711111
MED19	11.2195	0.00366204	0.0652174	0.23913	0.695652	0	0.122222	0.877778
PLCD3	11.2079	0.0036832	0.315217	0.141304	0.543478	0.144444	0.0777778	0.777778
ACBD4	11.2079	0.0036832	0.315217	0.141304	0.543478	0.144444	0.0777778	0.777778
HEXIM1	11.2079	0.0036832	0.315217	0.141304	0.543478	0.144444	0.0777778	0.777778
HEXIM2	11.2079	0.0036832	0.315217	0.141304	0.543478	0.144444	0.0777778	0.777778
FMNL1	11.2079	0.0036832	0.315217	0.141304	0.543478	0.144444	0.0777778	0.777778
SPATA32	11.2079	0.0036832	0.315217	0.141304	0.543478	0.144444	0.0777778	0.777778
MAP3K14	11.2079	0.0036832	0.315217	0.141304	0.543478	0.144444	0.0777778	0.777778
SOX9	11.1675	0.00375838	0.423913	0.108696	0.467391	0.233333	0.0555556	0.711111
LINC00469	11.1675	0.00375838	0.423913	0.108696	0.467391	0.233333	0.0555556	0.711111
BTBD17	11.1675	0.00375838	0.423913	0.108696	0.467391	0.233333	0.0555556	0.711111
C17orf77	11.1675	0.00375838	0.423913	0.108696	0.467391	0.233333	0.0555556	0.711111
CD300A	11.1675	0.00375838	0.423913	0.108696	0.467391	0.233333	0.0555556	0.711111
CD300C	11.1675	0.00375838	0.423913	0.108696	0.467391	0.233333	0.0555556	0.711111
CD300E	11.1675	0.00375838	0.423913	0.108696	0.467391	0.233333	0.0555556	0.711111
CD300LB	11.1675	0.00375838	0.423913	0.108696	0.467391	0.233333	0.0555556	0.711111
CD300LD	11.1675	0.00375838	0.423913	0.108696	0.467391	0.233333	0.0555556	0.711111
CD300LF	11.1675	0.00375838	0.423913	0.108696	0.467391	0.233333	0.0555556	0.711111
DNAI2	11.1675	0.00375838	0.423913	0.108696	0.467391	0.233333	0.0555556	0.711111
GPR142	11.1675	0.00375838	0.423913	0.108696	0.467391	0.233333	0.0555556	0.711111
GPRC5C	11.1675	0.00375838	0.423913	0.108696	0.467391	0.233333	0.0555556	0.711111
KIF19	11.1675	0.00375838	0.423913	0.108696	0.467391	0.233333	0.0555556	0.711111
RAB37	11.1675	0.00375838	0.423913	0.108696	0.467391	0.233333	0.0555556	0.711111
RNA5SP448	11.1675	0.00375838	0.423913	0.108696	0.467391	0.233333	0.0555556	0.711111
RPL38	11.1675	0.00375838	0.423913	0.108696	0.467391	0.233333	0.0555556	0.711111
TTYH2	11.1675	0.00375838	0.423913	0.108696	0.467391	0.233333	0.0555556	0.711111
MIR3615	11.1675	0.00375838	0.423913	0.108696	0.467391	0.233333	0.0555556	0.711111
SLC9A3R1	11.1675	0.00375838	0.423913	0.108696	0.467391	0.233333	0.0555556	0.711111
NAT9	11.1675	0.00375838	0.423913	0.108696	0.467391	0.233333	0.0555556	0.711111
TMEM104	11.1675	0.00375838	0.423913	0.108696	0.467391	0.233333	0.0555556	0.711111
GRIN2C	11.1675	0.00375838	0.423913	0.108696	0.467391	0.233333	0.0555556	0.711111
FDXR	11.1675	0.00375838	0.423913	0.108696	0.467391	0.233333	0.0555556	0.711111
FADS6	11.1675	0.00375838	0.423913	0.108696	0.467391	0.233333	0.0555556	0.711111
USH1G	11.1675	0.00375838	0.423913	0.108696	0.467391	0.233333	0.0555556	0.711111
OTOP2	11.1675	0.00375838	0.423913	0.108696	0.467391	0.233333	0.0555556	0.711111
OTOP3	11.1675	0.00375838	0.423913	0.108696	0.467391	0.233333	0.0555556	0.711111
HID1	11.1675	0.00375838	0.423913	0.108696	0.467391	0.233333	0.0555556	0.711111
CDR2L	11.1675	0.00375838	0.423913	0.108696	0.467391	0.233333	0.0555556	0.711111
ICT1	11.1675	0.00375838	0.423913	0.108696	0.467391	0.233333	0.0555556	0.711111
KCTD2	11.1675	0.00375838	0.423913	0.108696	0.467391	0.233333	0.0555556	0.711111
ATP5H	11.1675	0.00375838	0.423913	0.108696	0.467391	0.233333	0.0555556	0.711111
RN7SL573P	11.1675	0.00375838	0.423913	0.108696	0.467391	0.233333	0.0555556	0.711111
SLC16A5	11.1675	0.00375838	0.423913	0.108696	0.467391	0.233333	0.0555556	0.711111
ARMC7	11.1675	0.00375838	0.423913	0.108696	0.467391	0.233333	0.0555556	0.711111
HN1	11.1675	0.00375838	0.423913	0.108696	0.467391	0.233333	0.0555556	0.711111
NT5C	11.1675	0.00375838	0.423913	0.108696	0.467391	0.233333	0.0555556	0.711111
GJC1	11.1338	0.00382224	0.304348	0.152174	0.543478	0.144444	0.0777778	0.777778
HIGD1B	11.1338	0.00382224	0.304348	0.152174	0.543478	0.144444	0.0777778	0.777778
HOXB1	11.1192	0.00385032	0.358696	0.108696	0.532609	0.166667	0.0666667	0.766667
HOXB2	11.1192	0.00385032	0.358696	0.108696	0.532609	0.166667	0.0666667	0.766667
HOXB3	11.1192	0.00385032	0.358696	0.108696	0.532609	0.166667	0.0666667	0.766667
HOXB4	11.1192	0.00385032	0.358696	0.108696	0.532609	0.166667	0.0666667	0.766667
MIR10A	11.1192	0.00385032	0.358696	0.108696	0.532609	0.166667	0.0666667	0.766667
HOXB5	11.1192	0.00385032	0.358696	0.108696	0.532609	0.166667	0.0666667	0.766667
HOXB6	11.1192	0.00385032	0.358696	0.108696	0.532609	0.166667	0.0666667	0.766667
HOXB7	11.1192	0.00385032	0.358696	0.108696	0.532609	0.166667	0.0666667	0.766667
HOXB8	11.1192	0.00385032	0.358696	0.108696	0.532609	0.166667	0.0666667	0.766667
HOXB9	11.1192	0.00385032	0.358696	0.108696	0.532609	0.166667	0.0666667	0.766667
MIR196A1	11.1192	0.00385032	0.358696	0.108696	0.532609	0.166667	0.0666667	0.766667
HOXB13	11.1192	0.00385032	0.358696	0.108696	0.532609	0.166667	0.0666667	0.766667
MIR3185	11.1192	0.00385032	0.358696	0.108696	0.532609	0.166667	0.0666667	0.766667
PRAC	11.1192	0.00385032	0.358696	0.108696	0.532609	0.166667	0.0666667	0.766667
TTLL6	11.1192	0.00385032	0.358696	0.108696	0.532609	0.166667	0.0666667	0.766667
RN7SL125P	11.1192	0.00385032	0.358696	0.108696	0.532609	0.166667	0.0666667	0.766667
snoZ178	11.1192	0.00385032	0.358696	0.108696	0.532609	0.166667	0.0666667	0.766667
C17orf112	11.1192	0.00385032	0.358696	0.108696	0.532609	0.166667	0.0666667	0.766667
KIF2B	11.1192	0.00385032	0.358696	0.108696	0.532609	0.166667	0.0666667	0.766667
RN7SKP14	11.1192	0.00385032	0.358696	0.108696	0.532609	0.166667	0.0666667	0.766667
TMEM100	11.1192	0.00385032	0.358696	0.108696	0.532609	0.166667	0.0666667	0.766667
PCTP	11.1192	0.00385032	0.358696	0.108696	0.532609	0.166667	0.0666667	0.766667
ANKFN1	11.1192	0.00385032	0.358696	0.108696	0.532609	0.166667	0.0666667	0.766667
NOG	11.1192	0.00385032	0.358696	0.108696	0.532609	0.166667	0.0666667	0.766667
C17orf67	11.1192	0.00385032	0.358696	0.108696	0.532609	0.166667	0.0666667	0.766667
DGKE	11.1192	0.00385032	0.358696	0.108696	0.532609	0.166667	0.0666667	0.766667
TRIM25	11.1192	0.00385032	0.358696	0.108696	0.532609	0.166667	0.0666667	0.766667
MIR3614	11.1192	0.00385032	0.358696	0.108696	0.532609	0.166667	0.0666667	0.766667
COIL	11.1192	0.00385032	0.358696	0.108696	0.532609	0.166667	0.0666667	0.766667
SCPEP1	11.1192	0.00385032	0.358696	0.108696	0.532609	0.166667	0.0666667	0.766667
CDC27	11.1072	0.00387348	0.336957	0.130435	0.532609	0.155556	0.0777778	0.766667
ITGB3	11.1072	0.00387348	0.336957	0.130435	0.532609	0.155556	0.0777778	0.766667
GRB2	11.0718	0.0039426	0.434783	0.108696	0.456522	0.244444	0.0555556	0.7
MIR3678	11.0718	0.0039426	0.434783	0.108696	0.456522	0.244444	0.0555556	0.7
KIAA0195	11.0718	0.0039426	0.434783	0.108696	0.456522	0.244444	0.0555556	0.7
CASKIN2	11.0718	0.0039426	0.434783	0.108696	0.456522	0.244444	0.0555556	0.7
MYO15B	11.0718	0.0039426	0.434783	0.108696	0.456522	0.244444	0.0555556	0.7
RECQL5	11.0718	0.0039426	0.434783	0.108696	0.456522	0.244444	0.0555556	0.7
SMIM5	11.0718	0.0039426	0.434783	0.108696	0.456522	0.244444	0.0555556	0.7
SMIM6	11.0718	0.0039426	0.434783	0.108696	0.456522	0.244444	0.0555556	0.7
SPAG9	10.9887	0.00410992	0.347826	0.119565	0.532609	0.166667	0.0666667	0.766667
snoU13.ENSG00000238815.1	10.9887	0.00410992	0.347826	0.119565	0.532609	0.166667	0.0666667	0.766667
LYRM9	10.92	0.00425361	0.293478	0.130435	0.576087	0.122222	0.0777778	0.8
SNORA40.ENSG00000253065.1	10.8485	0.00440829	0.228261	0.195652	0.576087	0.344444	0.0444444	0.611111
DGKZ	10.835	0.00443815	0.0869565	0.23913	0.673913	0.0333333	0.0888889	0.877778
CHRM4	10.835	0.00443815	0.0869565	0.23913	0.673913	0.0333333	0.0888889	0.877778
MDK	10.835	0.00443815	0.0869565	0.23913	0.673913	0.0333333	0.0888889	0.877778
MIR4688	10.835	0.00443815	0.0869565	0.23913	0.673913	0.0333333	0.0888889	0.877778
TRIM49B	10.835	0.00443815	0.0869565	0.23913	0.673913	0.0333333	0.0888889	0.877778
TRIM64C	10.835	0.00443815	0.0869565	0.23913	0.673913	0.0333333	0.0888889	0.877778
FOLH1	10.835	0.00443815	0.0869565	0.23913	0.673913	0.0333333	0.0888889	0.877778
RNA5SP200	10.778	0.00456653	0.23913	0.195652	0.565217	0.355556	0.0444444	0.6
STC2	10.778	0.00456653	0.23913	0.195652	0.565217	0.355556	0.0444444	0.6
CUEDC1	10.7609	0.00460568	0.369565	0.108696	0.521739	0.188889	0.0555556	0.755556
HS3ST3A1	10.7559	0.00461723	0.0978261	0.554348	0.347826	0	0.522222	0.477778
MIR548H3	10.7559	0.00461723	0.0978261	0.554348	0.347826	0	0.522222	0.477778
FOXP1	10.7351	0.00466552	0.0978261	0.271739	0.630435	0.0888889	0.0888889	0.822222
RN7SL652P	10.6498	0.00486873	0.0869565	0.25	0.663043	0.0444444	0.0888889	0.866667
RN7SL576P	10.6301	0.00491715	0.304348	0.130435	0.565217	0.133333	0.0777778	0.788889
NOS2	10.6301	0.00491715	0.304348	0.130435	0.565217	0.133333	0.0777778	0.788889
TMEM97	10.6301	0.00491715	0.304348	0.130435	0.565217	0.133333	0.0777778	0.788889
IFT20	10.6301	0.00491715	0.304348	0.130435	0.565217	0.133333	0.0777778	0.788889
TNFAIP1	10.6301	0.00491715	0.304348	0.130435	0.565217	0.133333	0.0777778	0.788889
POLDIP2	10.6301	0.00491715	0.304348	0.130435	0.565217	0.133333	0.0777778	0.788889
TMEM199	10.6301	0.00491715	0.304348	0.130435	0.565217	0.133333	0.0777778	0.788889
MIR4723	10.6301	0.00491715	0.304348	0.130435	0.565217	0.133333	0.0777778	0.788889
SARM1	10.6301	0.00491715	0.304348	0.130435	0.565217	0.133333	0.0777778	0.788889
SEBOX	10.6301	0.00491715	0.304348	0.130435	0.565217	0.133333	0.0777778	0.788889
VTN	10.6301	0.00491715	0.304348	0.130435	0.565217	0.133333	0.0777778	0.788889
SLC46A1	10.6301	0.00491715	0.304348	0.130435	0.565217	0.133333	0.0777778	0.788889
FMNL2	10.615	0.00495425	0.228261	0.0978261	0.673913	0.0888889	0.233333	0.677778
PRPF40A	10.615	0.00495425	0.228261	0.0978261	0.673913	0.0888889	0.233333	0.677778
snoU13.ENSG00000238799.1	10.6076	0.00497273	0.380435	0.108696	0.51087	0.2	0.0555556	0.744444
EFCAB3	10.5415	0.00513985	0.380435	0.119565	0.5	0.211111	0.0555556	0.733333
METTL2A	10.5415	0.00513985	0.380435	0.119565	0.5	0.211111	0.0555556	0.733333
HARBI1	10.5148	0.00520873	0.0978261	0.23913	0.663043	0.0444444	0.0888889	0.866667
F2	10.5148	0.00520873	0.0978261	0.23913	0.663043	0.0444444	0.0888889	0.866667
CKAP5	10.5148	0.00520873	0.0978261	0.23913	0.663043	0.0444444	0.0888889	0.866667
MIR5582	10.5148	0.00520873	0.0978261	0.23913	0.663043	0.0444444	0.0888889	0.866667
SNORD67.ENSG00000252427.1	10.5148	0.00520873	0.0978261	0.23913	0.663043	0.0444444	0.0888889	0.866667
SNORD67.ENSG00000212135.1	10.5148	0.00520873	0.0978261	0.23913	0.663043	0.0444444	0.0888889	0.866667
C11orf49	10.5148	0.00520873	0.0978261	0.23913	0.663043	0.0444444	0.0888889	0.866667
ARFGAP2	10.5148	0.00520873	0.0978261	0.23913	0.663043	0.0444444	0.0888889	0.866667
PACSIN3	10.5148	0.00520873	0.0978261	0.23913	0.663043	0.0444444	0.0888889	0.866667
RN7SL772P	10.5148	0.00520873	0.0978261	0.23913	0.663043	0.0444444	0.0888889	0.866667
MADD	10.5148	0.00520873	0.0978261	0.23913	0.663043	0.0444444	0.0888889	0.866667
MYBPC3	10.5148	0.00520873	0.0978261	0.23913	0.663043	0.0444444	0.0888889	0.866667
SPI1	10.5148	0.00520873	0.0978261	0.23913	0.663043	0.0444444	0.0888889	0.866667
MIR4487	10.5148	0.00520873	0.0978261	0.23913	0.663043	0.0444444	0.0888889	0.866667
SLC39A13	10.5148	0.00520873	0.0978261	0.23913	0.663043	0.0444444	0.0888889	0.866667
PSMC3	10.5148	0.00520873	0.0978261	0.23913	0.663043	0.0444444	0.0888889	0.866667
RAPSN	10.5148	0.00520873	0.0978261	0.23913	0.663043	0.0444444	0.0888889	0.866667
RARS	10.5008	0.00524543	0.23913	0.195652	0.565217	0.344444	0.0444444	0.611111
FBLL1	10.5008	0.00524543	0.23913	0.195652	0.565217	0.344444	0.0444444	0.611111
PANK3	10.5008	0.00524543	0.23913	0.195652	0.565217	0.344444	0.0444444	0.611111
MIR103A1	10.5008	0.00524543	0.23913	0.195652	0.565217	0.344444	0.0444444	0.611111
SPDL1	10.5008	0.00524543	0.23913	0.195652	0.565217	0.344444	0.0444444	0.611111
DOCK2	10.5008	0.00524543	0.23913	0.195652	0.565217	0.344444	0.0444444	0.611111
FAM196B	10.5008	0.00524543	0.23913	0.195652	0.565217	0.344444	0.0444444	0.611111
MIR378E	10.5008	0.00524543	0.23913	0.195652	0.565217	0.344444	0.0444444	0.611111
FOXI1	10.5008	0.00524543	0.23913	0.195652	0.565217	0.344444	0.0444444	0.611111
GABRP	10.5008	0.00524543	0.23913	0.195652	0.565217	0.344444	0.0444444	0.611111
RANBP17	10.5008	0.00524543	0.23913	0.195652	0.565217	0.344444	0.0444444	0.611111
RN7SL623P	10.5008	0.00524543	0.23913	0.195652	0.565217	0.344444	0.0444444	0.611111
snoU13.ENSG00000252387.1	10.5008	0.00524543	0.23913	0.195652	0.565217	0.344444	0.0444444	0.611111
TLX3	10.5008	0.00524543	0.23913	0.195652	0.565217	0.344444	0.0444444	0.611111
RN7SL339P	10.5008	0.00524543	0.23913	0.195652	0.565217	0.344444	0.0444444	0.611111
SNORA70.ENSG00000206909.1	10.5008	0.00524543	0.23913	0.195652	0.565217	0.344444	0.0444444	0.611111
SNORA74B	10.5008	0.00524543	0.23913	0.195652	0.565217	0.344444	0.0444444	0.611111
CREBRF	10.5008	0.00524543	0.23913	0.195652	0.565217	0.344444	0.0444444	0.611111
BNIP1	10.5008	0.00524543	0.23913	0.195652	0.565217	0.344444	0.0444444	0.611111
RARA	10.4999	0.00524789	0.304348	0.152174	0.543478	0.133333	0.1	0.766667
GJD3	10.4999	0.00524789	0.304348	0.152174	0.543478	0.133333	0.1	0.766667
RNA5SP441	10.4999	0.00524789	0.304348	0.152174	0.543478	0.133333	0.1	0.766667
TOP2A	10.4999	0.00524789	0.304348	0.152174	0.543478	0.133333	0.1	0.766667
PLXDC1	10.4953	0.00525984	0.304348	0.152174	0.543478	0.122222	0.122222	0.755556
ARL5C	10.4953	0.00525984	0.304348	0.152174	0.543478	0.122222	0.122222	0.755556
CACNB1	10.4953	0.00525984	0.304348	0.152174	0.543478	0.122222	0.122222	0.755556
RPL19	10.4953	0.00525984	0.304348	0.152174	0.543478	0.122222	0.122222	0.755556
STAC2	10.4953	0.00525984	0.304348	0.152174	0.543478	0.122222	0.122222	0.755556
PPP1R1B	10.4953	0.00525984	0.304348	0.152174	0.543478	0.122222	0.122222	0.755556
STARD3	10.4953	0.00525984	0.304348	0.152174	0.543478	0.122222	0.122222	0.755556
PGAP3	10.4953	0.00525984	0.304348	0.152174	0.543478	0.122222	0.122222	0.755556
ERBB2	10.4953	0.00525984	0.304348	0.152174	0.543478	0.122222	0.122222	0.755556
MIR4728	10.4953	0.00525984	0.304348	0.152174	0.543478	0.122222	0.122222	0.755556
MIEN1	10.4953	0.00525984	0.304348	0.152174	0.543478	0.122222	0.122222	0.755556
GRB7	10.4953	0.00525984	0.304348	0.152174	0.543478	0.122222	0.122222	0.755556
TIMM10	10.4747	0.0053142	0.0652174	0.25	0.684783	0.0111111	0.111111	0.877778
SMTNL1	10.4747	0.0053142	0.0652174	0.25	0.684783	0.0111111	0.111111	0.877778
UBE2L6	10.4747	0.0053142	0.0652174	0.25	0.684783	0.0111111	0.111111	0.877778
APPBP2	10.4719	0.00532169	0.391304	0.108696	0.5	0.211111	0.0555556	0.733333
PPM1D	10.4719	0.00532169	0.391304	0.108696	0.5	0.211111	0.0555556	0.733333
RN7SL606P	10.4719	0.00532169	0.391304	0.108696	0.5	0.211111	0.0555556	0.733333
ZNF346	10.4468	0.00538893	0.25	0.195652	0.554348	0.355556	0.0444444	0.6
snoU13.ENSG00000238612.1	10.4371	0.00541524	0.391304	0.119565	0.48913	0.222222	0.0555556	0.722222
ERGIC1	10.3968	0.0055254	0.26087	0.195652	0.543478	0.366667	0.0444444	0.588889
FAM222B	10.3738	0.00558938	0.315217	0.130435	0.554348	0.144444	0.0777778	0.777778
KRT33B	10.3683	0.00560459	0.293478	0.152174	0.554348	0.133333	0.0888889	0.777778
KRT31	10.3683	0.00560459	0.293478	0.152174	0.554348	0.133333	0.0888889	0.777778
KRT34	10.3683	0.00560459	0.293478	0.152174	0.554348	0.133333	0.0888889	0.777778
KRT37	10.3683	0.00560459	0.293478	0.152174	0.554348	0.133333	0.0888889	0.777778
KRT38	10.3683	0.00560459	0.293478	0.152174	0.554348	0.133333	0.0888889	0.777778
KRT32	10.3683	0.00560459	0.293478	0.152174	0.554348	0.133333	0.0888889	0.777778
KRT35	10.3683	0.00560459	0.293478	0.152174	0.554348	0.133333	0.0888889	0.777778
KRT36	10.3683	0.00560459	0.293478	0.152174	0.554348	0.133333	0.0888889	0.777778
KRT13	10.3683	0.00560459	0.293478	0.152174	0.554348	0.133333	0.0888889	0.777778
KRT15	10.3683	0.00560459	0.293478	0.152174	0.554348	0.133333	0.0888889	0.777778
KRT19	10.3683	0.00560459	0.293478	0.152174	0.554348	0.133333	0.0888889	0.777778
LINC00974	10.3683	0.00560459	0.293478	0.152174	0.554348	0.133333	0.0888889	0.777778
KRT9	10.3683	0.00560459	0.293478	0.152174	0.554348	0.133333	0.0888889	0.777778
KRT14	10.3683	0.00560459	0.293478	0.152174	0.554348	0.133333	0.0888889	0.777778
KRT16	10.3683	0.00560459	0.293478	0.152174	0.554348	0.133333	0.0888889	0.777778
JUP	10.3683	0.00560459	0.293478	0.152174	0.554348	0.133333	0.0888889	0.777778
KRT17	10.3683	0.00560459	0.293478	0.152174	0.554348	0.133333	0.0888889	0.777778
KRT42P	10.3683	0.00560459	0.293478	0.152174	0.554348	0.133333	0.0888889	0.777778
EIF1	10.3683	0.00560459	0.293478	0.152174	0.554348	0.133333	0.0888889	0.777778
GAST	10.3683	0.00560459	0.293478	0.152174	0.554348	0.133333	0.0888889	0.777778
HAP1	10.3683	0.00560459	0.293478	0.152174	0.554348	0.133333	0.0888889	0.777778
RNA5SP442	10.3683	0.00560459	0.293478	0.152174	0.554348	0.133333	0.0888889	0.777778
RN7SL399P	10.3683	0.00560459	0.293478	0.152174	0.554348	0.133333	0.0888889	0.777778
ACLY	10.3683	0.00560459	0.293478	0.152174	0.554348	0.133333	0.0888889	0.777778
NKIRAS2	10.3683	0.00560459	0.293478	0.152174	0.554348	0.133333	0.0888889	0.777778
DHX58	10.3683	0.00560459	0.293478	0.152174	0.554348	0.133333	0.0888889	0.777778
KAT2A	10.3683	0.00560459	0.293478	0.152174	0.554348	0.133333	0.0888889	0.777778
HSPB9	10.3683	0.00560459	0.293478	0.152174	0.554348	0.133333	0.0888889	0.777778
CACNG4	10.3525	0.00564921	0.402174	0.108696	0.48913	0.222222	0.0555556	0.722222
RNA5SP447	10.3525	0.00564921	0.402174	0.108696	0.48913	0.222222	0.0555556	0.722222
SNORA8.ENSG00000207410.1	10.3525	0.00564921	0.402174	0.108696	0.48913	0.222222	0.0555556	0.722222
PSMD12	10.3525	0.00564921	0.402174	0.108696	0.48913	0.222222	0.0555556	0.722222
TOM1L1	10.3442	0.00567278	0.358696	0.108696	0.532609	0.166667	0.0777778	0.755556
COX11	10.3442	0.00567278	0.358696	0.108696	0.532609	0.166667	0.0777778	0.755556
STXBP4	10.3442	0.00567278	0.358696	0.108696	0.532609	0.166667	0.0777778	0.755556
MMD	10.3442	0.00567278	0.358696	0.108696	0.532609	0.166667	0.0777778	0.755556
EFCAB13	10.324	0.00573025	0.336957	0.119565	0.543478	0.155556	0.0777778	0.766667
ARHGAP1	10.2888	0.00583211	0.108696	0.23913	0.652174	0.0555556	0.0888889	0.855556
ZNF408	10.2888	0.00583211	0.108696	0.23913	0.652174	0.0555556	0.0888889	0.855556
ZNRF3	10.2511	0.00594306	0.163043	0.282609	0.554348	0.0888889	0.133333	0.777778
ERAL1	10.2505	0.00594463	0.304348	0.141304	0.554348	0.144444	0.0777778	0.777778
MIR4732	10.2505	0.00594463	0.304348	0.141304	0.554348	0.144444	0.0777778	0.777778
DCAKD	10.2505	0.00594463	0.304348	0.141304	0.554348	0.144444	0.0777778	0.777778
NMT1	10.2505	0.00594463	0.304348	0.141304	0.554348	0.144444	0.0777778	0.777778
RNA5SP443	10.2505	0.00594463	0.304348	0.141304	0.554348	0.144444	0.0777778	0.777778
APOH	10.2479	0.00595236	0.413043	0.108696	0.478261	0.233333	0.0555556	0.711111
RNA5SP444	10.2479	0.00595236	0.413043	0.108696	0.478261	0.233333	0.0555556	0.711111
LINC00877	10.2434	0.00596578	0.130435	0.25	0.619565	0.0888889	0.0888889	0.822222
SLIT3	10.2245	0.00602259	0.25	0.195652	0.554348	0.344444	0.0444444	0.611111
MIR585	10.2245	0.00602259	0.25	0.195652	0.554348	0.344444	0.0444444	0.611111
C5orf58	10.2245	0.00602259	0.25	0.195652	0.554348	0.344444	0.0444444	0.611111
LCP2	10.2245	0.00602259	0.25	0.195652	0.554348	0.344444	0.0444444	0.611111
KCNIP1	10.2245	0.00602259	0.25	0.195652	0.554348	0.344444	0.0444444	0.611111
KCNMB1	10.2245	0.00602259	0.25	0.195652	0.554348	0.344444	0.0444444	0.611111
MIR4454	10.2245	0.00602259	0.25	0.195652	0.554348	0.344444	0.0444444	0.611111
ATP6V0E1	10.2245	0.00602259	0.25	0.195652	0.554348	0.344444	0.0444444	0.611111
KREMEN1	10.197	0.00610603	0.173913	0.271739	0.554348	0.0888889	0.133333	0.777778
RPL26L1	10.185	0.0061425	0.26087	0.195652	0.543478	0.355556	0.0444444	0.6
UIMC1	10.185	0.0061425	0.26087	0.195652	0.543478	0.355556	0.0444444	0.6
SKAP1	10.1618	0.00621432	0.347826	0.108696	0.543478	0.166667	0.0666667	0.766667
U3.ENSG00000200538.1	10.1618	0.00621432	0.347826	0.108696	0.543478	0.166667	0.0666667	0.766667
SNORA68.ENSG00000212565.1	10.1618	0.00621432	0.347826	0.108696	0.543478	0.166667	0.0666667	0.766667
ATP5G1	10.1618	0.00621432	0.347826	0.108696	0.543478	0.166667	0.0666667	0.766667
UBE2Z	10.1618	0.00621432	0.347826	0.108696	0.543478	0.166667	0.0666667	0.766667
SNF8	10.1618	0.00621432	0.347826	0.108696	0.543478	0.166667	0.0666667	0.766667
snoU13.ENSG00000238804.1	10.1618	0.00621432	0.347826	0.108696	0.543478	0.166667	0.0666667	0.766667
GIP	10.1618	0.00621432	0.347826	0.108696	0.543478	0.166667	0.0666667	0.766667
IGF2BP1	10.1618	0.00621432	0.347826	0.108696	0.543478	0.166667	0.0666667	0.766667
B4GALNT2	10.1618	0.00621432	0.347826	0.108696	0.543478	0.166667	0.0666667	0.766667
GNGT2	10.1618	0.00621432	0.347826	0.108696	0.543478	0.166667	0.0666667	0.766667
ABI3	10.1618	0.00621432	0.347826	0.108696	0.543478	0.166667	0.0666667	0.766667
PHOSPHO1	10.1618	0.00621432	0.347826	0.108696	0.543478	0.166667	0.0666667	0.766667
NXPH3	10.1618	0.00621432	0.347826	0.108696	0.543478	0.166667	0.0666667	0.766667
SPOP	10.1618	0.00621432	0.347826	0.108696	0.543478	0.166667	0.0666667	0.766667
SLC35B1	10.1618	0.00621432	0.347826	0.108696	0.543478	0.166667	0.0666667	0.766667
FAM117A	10.1618	0.00621432	0.347826	0.108696	0.543478	0.166667	0.0666667	0.766667
KAT7	10.1618	0.00621432	0.347826	0.108696	0.543478	0.166667	0.0666667	0.766667
TAC4	10.1618	0.00621432	0.347826	0.108696	0.543478	0.166667	0.0666667	0.766667
DLX4	10.1618	0.00621432	0.347826	0.108696	0.543478	0.166667	0.0666667	0.766667
DLX3	10.1618	0.00621432	0.347826	0.108696	0.543478	0.166667	0.0666667	0.766667
ITGA3	10.1618	0.00621432	0.347826	0.108696	0.543478	0.166667	0.0666667	0.766667
PDK2	10.1618	0.00621432	0.347826	0.108696	0.543478	0.166667	0.0666667	0.766667
SAMD14	10.1618	0.00621432	0.347826	0.108696	0.543478	0.166667	0.0666667	0.766667
PPP1R9B	10.1618	0.00621432	0.347826	0.108696	0.543478	0.166667	0.0666667	0.766667
SGCA	10.1618	0.00621432	0.347826	0.108696	0.543478	0.166667	0.0666667	0.766667
HILS1	10.1618	0.00621432	0.347826	0.108696	0.543478	0.166667	0.0666667	0.766667
COL1A1	10.1618	0.00621432	0.347826	0.108696	0.543478	0.166667	0.0666667	0.766667
snoU13.ENSG00000239135.1	10.1618	0.00621432	0.347826	0.108696	0.543478	0.166667	0.0666667	0.766667
TMEM92	10.1618	0.00621432	0.347826	0.108696	0.543478	0.166667	0.0666667	0.766667
XYLT2	10.1618	0.00621432	0.347826	0.108696	0.543478	0.166667	0.0666667	0.766667
MRPL27	10.1618	0.00621432	0.347826	0.108696	0.543478	0.166667	0.0666667	0.766667
EME1	10.1618	0.00621432	0.347826	0.108696	0.543478	0.166667	0.0666667	0.766667
LRRC59	10.1618	0.00621432	0.347826	0.108696	0.543478	0.166667	0.0666667	0.766667
ACSF2	10.1618	0.00621432	0.347826	0.108696	0.543478	0.166667	0.0666667	0.766667
CHAD	10.1618	0.00621432	0.347826	0.108696	0.543478	0.166667	0.0666667	0.766667
RSAD1	10.1618	0.00621432	0.347826	0.108696	0.543478	0.166667	0.0666667	0.766667
MYCBPAP	10.1618	0.00621432	0.347826	0.108696	0.543478	0.166667	0.0666667	0.766667
EPN3	10.1618	0.00621432	0.347826	0.108696	0.543478	0.166667	0.0666667	0.766667
SPATA20	10.1618	0.00621432	0.347826	0.108696	0.543478	0.166667	0.0666667	0.766667
CACNA1G	10.1618	0.00621432	0.347826	0.108696	0.543478	0.166667	0.0666667	0.766667
NME1	10.1618	0.00621432	0.347826	0.108696	0.543478	0.166667	0.0666667	0.766667
NME2	10.1618	0.00621432	0.347826	0.108696	0.543478	0.166667	0.0666667	0.766667
MBTD1	10.1618	0.00621432	0.347826	0.108696	0.543478	0.166667	0.0666667	0.766667
UTP18	10.1618	0.00621432	0.347826	0.108696	0.543478	0.166667	0.0666667	0.766667
RN7SL699P	10.1618	0.00621432	0.347826	0.108696	0.543478	0.166667	0.0666667	0.766667
SAP30BP	10.1572	0.00622861	0.423913	0.108696	0.467391	0.244444	0.0555556	0.7
ITGB4	10.1572	0.00622861	0.423913	0.108696	0.467391	0.244444	0.0555556	0.7
GALK1	10.1572	0.00622861	0.423913	0.108696	0.467391	0.244444	0.0555556	0.7
H3F3B	10.1572	0.00622861	0.423913	0.108696	0.467391	0.244444	0.0555556	0.7
MIR4738	10.1572	0.00622861	0.423913	0.108696	0.467391	0.244444	0.0555556	0.7
UNK	10.1572	0.00622861	0.423913	0.108696	0.467391	0.244444	0.0555556	0.7
UNC13D	10.1572	0.00622861	0.423913	0.108696	0.467391	0.244444	0.0555556	0.7
WBP2	10.1572	0.00622861	0.423913	0.108696	0.467391	0.244444	0.0555556	0.7
TRIM47	10.1572	0.00622861	0.423913	0.108696	0.467391	0.244444	0.0555556	0.7
TRIM65	10.1572	0.00622861	0.423913	0.108696	0.467391	0.244444	0.0555556	0.7
MRPL38	10.1572	0.00622861	0.423913	0.108696	0.467391	0.244444	0.0555556	0.7
FBF1	10.1572	0.00622861	0.423913	0.108696	0.467391	0.244444	0.0555556	0.7
TEN1	10.1572	0.00622861	0.423913	0.108696	0.467391	0.244444	0.0555556	0.7
CDK3	10.1572	0.00622861	0.423913	0.108696	0.467391	0.244444	0.0555556	0.7
EVPL	10.1572	0.00622861	0.423913	0.108696	0.467391	0.244444	0.0555556	0.7
SRP68	10.1572	0.00622861	0.423913	0.108696	0.467391	0.244444	0.0555556	0.7
EXOC7	10.1572	0.00622861	0.423913	0.108696	0.467391	0.244444	0.0555556	0.7
GALR2	10.1572	0.00622861	0.423913	0.108696	0.467391	0.244444	0.0555556	0.7
ZACN	10.1572	0.00622861	0.423913	0.108696	0.467391	0.244444	0.0555556	0.7
FOXJ1	10.1572	0.00622861	0.423913	0.108696	0.467391	0.244444	0.0555556	0.7
RNF157	10.1572	0.00622861	0.423913	0.108696	0.467391	0.244444	0.0555556	0.7
QRICH2	10.1572	0.00622861	0.423913	0.108696	0.467391	0.244444	0.0555556	0.7
UBALD2	10.1572	0.00622861	0.423913	0.108696	0.467391	0.244444	0.0555556	0.7
PRPSAP1	10.1572	0.00622861	0.423913	0.108696	0.467391	0.244444	0.0555556	0.7
snoU13.ENSG00000238418.1	10.1572	0.00622861	0.423913	0.108696	0.467391	0.244444	0.0555556	0.7
SPHK1	10.1572	0.00622861	0.423913	0.108696	0.467391	0.244444	0.0555556	0.7
UBE2O	10.1572	0.00622861	0.423913	0.108696	0.467391	0.244444	0.0555556	0.7
LINC00868	10.1572	0.00622861	0.423913	0.108696	0.467391	0.244444	0.0555556	0.7
LINC00338	10.1572	0.00622861	0.423913	0.108696	0.467391	0.244444	0.0555556	0.7
SEC14L1	10.1572	0.00622861	0.423913	0.108696	0.467391	0.244444	0.0555556	0.7
CBX8	10.1572	0.00622861	0.423913	0.108696	0.467391	0.244444	0.0555556	0.7
CBX4	10.1572	0.00622861	0.423913	0.108696	0.467391	0.244444	0.0555556	0.7
RN7SL454P	10.1528	0.00624224	0.423913	0.108696	0.467391	0.233333	0.0666667	0.7
CYTH1	10.1528	0.00624224	0.423913	0.108696	0.467391	0.233333	0.0666667	0.7
MIR4739	10.1528	0.00624224	0.423913	0.108696	0.467391	0.233333	0.0666667	0.7
snoU13.ENSG00000239173.1	10.1528	0.00624224	0.423913	0.108696	0.467391	0.233333	0.0666667	0.7
ENPP7	10.1528	0.00624224	0.423913	0.108696	0.467391	0.233333	0.0666667	0.7
CBX2	10.1528	0.00624224	0.423913	0.108696	0.467391	0.233333	0.0666667	0.7
WNT9B	10.1468	0.006261	0.326087	0.130435	0.543478	0.155556	0.0777778	0.766667
RNU6ATAC3P	10.1468	0.006261	0.326087	0.130435	0.543478	0.155556	0.0777778	0.766667
RN7SL270P	10.1468	0.006261	0.326087	0.130435	0.543478	0.155556	0.0777778	0.766667
MYL4	10.1468	0.006261	0.326087	0.130435	0.543478	0.155556	0.0777778	0.766667
snoU13.ENSG00000252088.1	10.1468	0.006261	0.326087	0.130435	0.543478	0.155556	0.0777778	0.766667
TTC25	10.137	0.00629176	0.304348	0.152174	0.543478	0.144444	0.0888889	0.766667
CNP	10.137	0.00629176	0.304348	0.152174	0.543478	0.144444	0.0888889	0.766667
DNAJC7	10.137	0.00629176	0.304348	0.152174	0.543478	0.144444	0.0888889	0.766667
SLC25A39	10.137	0.00629176	0.304348	0.152174	0.543478	0.144444	0.0888889	0.766667
GRN	10.137	0.00629176	0.304348	0.152174	0.543478	0.144444	0.0888889	0.766667
FAM171A2	10.137	0.00629176	0.304348	0.152174	0.543478	0.144444	0.0888889	0.766667
ITGA2B	10.137	0.00629176	0.304348	0.152174	0.543478	0.144444	0.0888889	0.766667
GPATCH8	10.137	0.00629176	0.304348	0.152174	0.543478	0.144444	0.0888889	0.766667
RN7SL258P	10.137	0.00629176	0.304348	0.152174	0.543478	0.144444	0.0888889	0.766667
FZD2	10.137	0.00629176	0.304348	0.152174	0.543478	0.144444	0.0888889	0.766667
C17orf104	10.137	0.00629176	0.304348	0.152174	0.543478	0.144444	0.0888889	0.766667
CCDC43	10.137	0.00629176	0.304348	0.152174	0.543478	0.144444	0.0888889	0.766667
DBF4B	10.137	0.00629176	0.304348	0.152174	0.543478	0.144444	0.0888889	0.766667
RN7SL819P	10.137	0.00629176	0.304348	0.152174	0.543478	0.144444	0.0888889	0.766667
ADAM11	10.137	0.00629176	0.304348	0.152174	0.543478	0.144444	0.0888889	0.766667
PLA2G3	10.1077	0.00638479	0.152174	0.271739	0.576087	0.1	0.111111	0.788889
MIR3928	10.1077	0.00638479	0.152174	0.271739	0.576087	0.1	0.111111	0.788889
RNF185	10.1077	0.00638479	0.152174	0.271739	0.576087	0.1	0.111111	0.788889
TSEN54	10.0794	0.00647582	0.434783	0.108696	0.456522	0.255556	0.0555556	0.688889
LLGL2	10.0794	0.00647582	0.434783	0.108696	0.456522	0.255556	0.0555556	0.688889
SNORA76.ENSG00000253007.2	10.0635	0.00652723	0.163043	0.271739	0.565217	0.111111	0.111111	0.777778
ST6GALNAC1	10.0512	0.00656766	0.434783	0.108696	0.456522	0.244444	0.0666667	0.688889
MXRA7	10.0512	0.00656766	0.434783	0.108696	0.456522	0.244444	0.0666667	0.688889
JMJD6	10.0512	0.00656766	0.434783	0.108696	0.456522	0.244444	0.0666667	0.688889
METTL23	10.0512	0.00656766	0.434783	0.108696	0.456522	0.244444	0.0666667	0.688889
MFSD11	10.0512	0.00656766	0.434783	0.108696	0.456522	0.244444	0.0666667	0.688889
MIR636	10.0512	0.00656766	0.434783	0.108696	0.456522	0.244444	0.0666667	0.688889
SRSF2	10.0512	0.00656766	0.434783	0.108696	0.456522	0.244444	0.0666667	0.688889
SNX11	10.0487	0.00657601	0.336957	0.119565	0.543478	0.166667	0.0666667	0.766667
MIR1203	10.0487	0.00657601	0.336957	0.119565	0.543478	0.166667	0.0666667	0.766667
EFTUD2	10.0454	0.0065867	0.315217	0.141304	0.543478	0.155556	0.0777778	0.766667
CCDC103	10.0454	0.0065867	0.315217	0.141304	0.543478	0.155556	0.0777778	0.766667
FAM187A	10.0454	0.0065867	0.315217	0.141304	0.543478	0.155556	0.0777778	0.766667
GFAP	10.0454	0.0065867	0.315217	0.141304	0.543478	0.155556	0.0777778	0.766667
KIF18B	10.0454	0.0065867	0.315217	0.141304	0.543478	0.155556	0.0777778	0.766667
C1QL1	10.0454	0.0065867	0.315217	0.141304	0.543478	0.155556	0.0777778	0.766667
ARHGAP27	10.0454	0.0065867	0.315217	0.141304	0.543478	0.155556	0.0777778	0.766667
ARL17A	10.0454	0.0065867	0.315217	0.141304	0.543478	0.155556	0.0777778	0.766667
ARL17B	10.0454	0.0065867	0.315217	0.141304	0.543478	0.155556	0.0777778	0.766667
CRHR1	10.0454	0.0065867	0.315217	0.141304	0.543478	0.155556	0.0777778	0.766667
FAM215B	10.0454	0.0065867	0.315217	0.141304	0.543478	0.155556	0.0777778	0.766667
KANSL1	10.0454	0.0065867	0.315217	0.141304	0.543478	0.155556	0.0777778	0.766667
LRRC37A2	10.0454	0.0065867	0.315217	0.141304	0.543478	0.155556	0.0777778	0.766667
LRRC37A4P	10.0454	0.0065867	0.315217	0.141304	0.543478	0.155556	0.0777778	0.766667
LRRC37A	10.0454	0.0065867	0.315217	0.141304	0.543478	0.155556	0.0777778	0.766667
MAPT	10.0454	0.0065867	0.315217	0.141304	0.543478	0.155556	0.0777778	0.766667
NSF	10.0454	0.0065867	0.315217	0.141304	0.543478	0.155556	0.0777778	0.766667
PLEKHM1	10.0454	0.0065867	0.315217	0.141304	0.543478	0.155556	0.0777778	0.766667
RN7SL199P	10.0454	0.0065867	0.315217	0.141304	0.543478	0.155556	0.0777778	0.766667
RN7SL656P	10.0454	0.0065867	0.315217	0.141304	0.543478	0.155556	0.0777778	0.766667
RN7SL730P	10.0454	0.0065867	0.315217	0.141304	0.543478	0.155556	0.0777778	0.766667
RN7SL739P	10.0454	0.0065867	0.315217	0.141304	0.543478	0.155556	0.0777778	0.766667
SPPL2C	10.0454	0.0065867	0.315217	0.141304	0.543478	0.155556	0.0777778	0.766667
STH	10.0454	0.0065867	0.315217	0.141304	0.543478	0.155556	0.0777778	0.766667
WNT3	10.0454	0.0065867	0.315217	0.141304	0.543478	0.155556	0.0777778	0.766667
X9.Sep	10.0337	0.00662543	0.423913	0.119565	0.456522	0.244444	0.0666667	0.688889
RN7SL405P	10.0128	0.00669481	0.304348	0.152174	0.543478	0.155556	0.0777778	0.766667
DUSP1	9.96635	0.00685227	0.282609	0.195652	0.521739	0.366667	0.0444444	0.588889
ABCC3	9.96265	0.00686495	0.358696	0.108696	0.532609	0.177778	0.0666667	0.755556
ANKRD40	9.96265	0.00686495	0.358696	0.108696	0.532609	0.177778	0.0666667	0.755556
LUC7L3	9.96265	0.00686495	0.358696	0.108696	0.532609	0.177778	0.0666667	0.755556
LINC00483	9.96265	0.00686495	0.358696	0.108696	0.532609	0.177778	0.0666667	0.755556
TXN2	9.96227	0.00686628	0.173913	0.23913	0.586957	0.1	0.1	0.8
MIR3163	9.95373	0.00689563	0.0869565	0.25	0.663043	0.0888889	0.0777778	0.833333
LRRC4C	9.91537	0.00702918	0.076087	0.23913	0.684783	0.0333333	0.0888889	0.877778
ABTB2	9.88403	0.00714019	0.076087	0.25	0.673913	0.0444444	0.0888889	0.866667
PATZ1	9.85682	0.007238	0.163043	0.26087	0.576087	0.1	0.111111	0.788889
DRG1	9.85682	0.007238	0.163043	0.26087	0.576087	0.1	0.111111	0.788889
ISX	9.85682	0.007238	0.163043	0.26087	0.576087	0.1	0.111111	0.788889
HMGXB4	9.85682	0.007238	0.163043	0.26087	0.576087	0.1	0.111111	0.788889
SOX6	9.80773	0.00741786	0.0978261	0.26087	0.641304	0.0444444	0.111111	0.844444
NEURL1B	9.80262	0.00743683	0.282609	0.195652	0.521739	0.344444	0.0444444	0.611111
MIR5003	9.80262	0.00743683	0.282609	0.195652	0.521739	0.344444	0.0444444	0.611111
USP22	9.77518	0.00753959	0.206522	0.347826	0.445652	0.0666667	0.3	0.633333
WWC1	9.75988	0.00759746	0.23913	0.206522	0.554348	0.344444	0.0555556	0.6
DHRS7B	9.7289	0.00771608	0.195652	0.358696	0.445652	0.0666667	0.288889	0.644444
TMEM11	9.7289	0.00771608	0.195652	0.358696	0.445652	0.0666667	0.288889	0.644444
RN7SL426P	9.7289	0.00771608	0.195652	0.358696	0.445652	0.0666667	0.288889	0.644444
C17orf103	9.7289	0.00771608	0.195652	0.358696	0.445652	0.0666667	0.288889	0.644444
MAP2K3	9.7289	0.00771608	0.195652	0.358696	0.445652	0.0666667	0.288889	0.644444
FAM118A	9.71833	0.00775697	0.195652	0.282609	0.521739	0.1	0.155556	0.744444
SMC1B	9.71833	0.00775697	0.195652	0.282609	0.521739	0.1	0.155556	0.744444
MIR4522	9.67711	0.00791847	0.293478	0.130435	0.576087	0.133333	0.0777778	0.788889
WSB1	9.67711	0.00791847	0.293478	0.130435	0.576087	0.133333	0.0777778	0.788889
TBC1D3P5	9.67711	0.00791847	0.293478	0.130435	0.576087	0.133333	0.0777778	0.788889
KSR1	9.67711	0.00791847	0.293478	0.130435	0.576087	0.133333	0.0777778	0.788889
LGALS9	9.67711	0.00791847	0.293478	0.130435	0.576087	0.133333	0.0777778	0.788889
SLC13A2	9.67711	0.00791847	0.293478	0.130435	0.576087	0.133333	0.0777778	0.788889
FOXN1	9.67711	0.00791847	0.293478	0.130435	0.576087	0.133333	0.0777778	0.788889
UNC119	9.67711	0.00791847	0.293478	0.130435	0.576087	0.133333	0.0777778	0.788889
PIGS	9.67711	0.00791847	0.293478	0.130435	0.576087	0.133333	0.0777778	0.788889
TSPAN18	9.67443	0.00792911	0.0869565	0.23913	0.673913	0.0444444	0.0888889	0.866667
TP53I11	9.67443	0.00792911	0.0869565	0.23913	0.673913	0.0444444	0.0888889	0.866667
AMBRA1	9.67443	0.00792911	0.0869565	0.23913	0.673913	0.0444444	0.0888889	0.866667
LRP4	9.67443	0.00792911	0.0869565	0.23913	0.673913	0.0444444	0.0888889	0.866667
NDUFS3	9.67443	0.00792911	0.0869565	0.23913	0.673913	0.0444444	0.0888889	0.866667
PTPMT1	9.67443	0.00792911	0.0869565	0.23913	0.673913	0.0444444	0.0888889	0.866667
KBTBD4	9.67443	0.00792911	0.0869565	0.23913	0.673913	0.0444444	0.0888889	0.866667
C1QTNF4	9.67443	0.00792911	0.0869565	0.23913	0.673913	0.0444444	0.0888889	0.866667
FAM180B	9.67443	0.00792911	0.0869565	0.23913	0.673913	0.0444444	0.0888889	0.866667
MTCH2	9.67443	0.00792911	0.0869565	0.23913	0.673913	0.0444444	0.0888889	0.866667
AGBL2	9.67443	0.00792911	0.0869565	0.23913	0.673913	0.0444444	0.0888889	0.866667
FNBP4	9.67443	0.00792911	0.0869565	0.23913	0.673913	0.0444444	0.0888889	0.866667
snoU13.ENSG00000252447.1	9.67443	0.00792911	0.0869565	0.23913	0.673913	0.0444444	0.0888889	0.866667
NUP160	9.67443	0.00792911	0.0869565	0.23913	0.673913	0.0444444	0.0888889	0.866667
RNA5SP340	9.67443	0.00792911	0.0869565	0.23913	0.673913	0.0444444	0.0888889	0.866667
MIR3161	9.67443	0.00792911	0.0869565	0.23913	0.673913	0.0444444	0.0888889	0.866667
OR4B1	9.67443	0.00792911	0.0869565	0.23913	0.673913	0.0444444	0.0888889	0.866667
OR4X2	9.67443	0.00792911	0.0869565	0.23913	0.673913	0.0444444	0.0888889	0.866667
OR4X1	9.67443	0.00792911	0.0869565	0.23913	0.673913	0.0444444	0.0888889	0.866667
OR4S1	9.67443	0.00792911	0.0869565	0.23913	0.673913	0.0444444	0.0888889	0.866667
OR4C3	9.67443	0.00792911	0.0869565	0.23913	0.673913	0.0444444	0.0888889	0.866667
OR4A47	9.67443	0.00792911	0.0869565	0.23913	0.673913	0.0444444	0.0888889	0.866667
OR4C5	9.67443	0.00792911	0.0869565	0.23913	0.673913	0.0444444	0.0888889	0.866667
NF2	9.6729	0.00793517	0.152174	0.271739	0.576087	0.0888889	0.122222	0.788889
CABP7	9.6729	0.00793517	0.152174	0.271739	0.576087	0.0888889	0.122222	0.788889
ZMAT5	9.6729	0.00793517	0.152174	0.271739	0.576087	0.0888889	0.122222	0.788889
UQCR10	9.6729	0.00793517	0.152174	0.271739	0.576087	0.0888889	0.122222	0.788889
CYB561	9.66916	0.00795001	0.369565	0.119565	0.51087	0.211111	0.0555556	0.733333
ACE	9.66916	0.00795001	0.369565	0.119565	0.51087	0.211111	0.0555556	0.733333
KCNH6	9.66916	0.00795001	0.369565	0.119565	0.51087	0.211111	0.0555556	0.733333
DCAF7	9.66916	0.00795001	0.369565	0.119565	0.51087	0.211111	0.0555556	0.733333
TACO1	9.66916	0.00795001	0.369565	0.119565	0.51087	0.211111	0.0555556	0.733333
MAP3K3	9.66916	0.00795001	0.369565	0.119565	0.51087	0.211111	0.0555556	0.733333
LIMD2	9.66916	0.00795001	0.369565	0.119565	0.51087	0.211111	0.0555556	0.733333
STRADA	9.66916	0.00795001	0.369565	0.119565	0.51087	0.211111	0.0555556	0.733333
CCDC47	9.66916	0.00795001	0.369565	0.119565	0.51087	0.211111	0.0555556	0.733333
CYTH4	9.6351	0.00808658	0.163043	0.25	0.586957	0.133333	0.0888889	0.777778
ELFN2	9.6351	0.00808658	0.163043	0.25	0.586957	0.133333	0.0888889	0.777778
RN7SL294P	9.62669	0.00812063	0.108696	0.23913	0.652174	0.0888889	0.0777778	0.833333
FAM86DP	9.62669	0.00812063	0.108696	0.23913	0.652174	0.0888889	0.0777778	0.833333
FRG2C	9.62669	0.00812063	0.108696	0.23913	0.652174	0.0888889	0.0777778	0.833333
LINC00960	9.62669	0.00812063	0.108696	0.23913	0.652174	0.0888889	0.0777778	0.833333
MIR1324	9.62669	0.00812063	0.108696	0.23913	0.652174	0.0888889	0.0777778	0.833333
MIR4273	9.62669	0.00812063	0.108696	0.23913	0.652174	0.0888889	0.0777778	0.833333
RN7SL92P	9.62669	0.00812063	0.108696	0.23913	0.652174	0.0888889	0.0777778	0.833333
ZNF717	9.62669	0.00812063	0.108696	0.23913	0.652174	0.0888889	0.0777778	0.833333
C11orf86	9.62669	0.00812063	0.108696	0.23913	0.652174	0.0888889	0.0777778	0.833333
U3.ENSG00000252709.1	9.62669	0.00812063	0.108696	0.23913	0.652174	0.0888889	0.0777778	0.833333
SYT12	9.62669	0.00812063	0.108696	0.23913	0.652174	0.0888889	0.0777778	0.833333
SERPING1	9.62404	0.00813142	0.0652174	0.23913	0.695652	0.0111111	0.111111	0.877778
MIR130A	9.62404	0.00813142	0.0652174	0.23913	0.695652	0.0111111	0.111111	0.877778
YPEL4	9.62404	0.00813142	0.0652174	0.23913	0.695652	0.0111111	0.111111	0.877778
CLP1	9.62404	0.00813142	0.0652174	0.23913	0.695652	0.0111111	0.111111	0.877778
ZDHHC5	9.62404	0.00813142	0.0652174	0.23913	0.695652	0.0111111	0.111111	0.877778
BTBD18	9.62404	0.00813142	0.0652174	0.23913	0.695652	0.0111111	0.111111	0.877778
C11orf31	9.62404	0.00813142	0.0652174	0.23913	0.695652	0.0111111	0.111111	0.877778
MIR4634	9.59214	0.00826216	0.23913	0.184783	0.576087	0.344444	0.0444444	0.611111
MSX2	9.59214	0.00826216	0.23913	0.184783	0.576087	0.344444	0.0444444	0.611111
DRD1	9.59214	0.00826216	0.23913	0.184783	0.576087	0.344444	0.0444444	0.611111
snoU13.ENSG00000239026.1	9.59214	0.00826216	0.23913	0.184783	0.576087	0.344444	0.0444444	0.611111
TBX2	9.58128	0.00830715	0.380435	0.108696	0.51087	0.211111	0.0555556	0.733333
C17orf82	9.58128	0.00830715	0.380435	0.108696	0.51087	0.211111	0.0555556	0.733333
TBX4	9.58128	0.00830715	0.380435	0.108696	0.51087	0.211111	0.0555556	0.733333
NACA2	9.58128	0.00830715	0.380435	0.108696	0.51087	0.211111	0.0555556	0.733333
BRIP1	9.58128	0.00830715	0.380435	0.108696	0.51087	0.211111	0.0555556	0.733333
TBC1D3P2	9.58128	0.00830715	0.380435	0.108696	0.51087	0.211111	0.0555556	0.733333
TLK2	9.58128	0.00830715	0.380435	0.108696	0.51087	0.211111	0.0555556	0.733333
MRC2	9.58128	0.00830715	0.380435	0.108696	0.51087	0.211111	0.0555556	0.733333
X10.Mar	9.58128	0.00830715	0.380435	0.108696	0.51087	0.211111	0.0555556	0.733333
MIR633	9.58128	0.00830715	0.380435	0.108696	0.51087	0.211111	0.0555556	0.733333
TANC2	9.58128	0.00830715	0.380435	0.108696	0.51087	0.211111	0.0555556	0.733333
DDX42	9.58128	0.00830715	0.380435	0.108696	0.51087	0.211111	0.0555556	0.733333
FTSJ3	9.58128	0.00830715	0.380435	0.108696	0.51087	0.211111	0.0555556	0.733333
PSMC5	9.58128	0.00830715	0.380435	0.108696	0.51087	0.211111	0.0555556	0.733333
SMARCD2	9.58128	0.00830715	0.380435	0.108696	0.51087	0.211111	0.0555556	0.733333
RN7SL805P	9.58128	0.00830715	0.380435	0.108696	0.51087	0.211111	0.0555556	0.733333
TCAM1P	9.58128	0.00830715	0.380435	0.108696	0.51087	0.211111	0.0555556	0.733333
CSH1	9.58128	0.00830715	0.380435	0.108696	0.51087	0.211111	0.0555556	0.733333
CSH2	9.58128	0.00830715	0.380435	0.108696	0.51087	0.211111	0.0555556	0.733333
CSHL1	9.58128	0.00830715	0.380435	0.108696	0.51087	0.211111	0.0555556	0.733333
GH2	9.58128	0.00830715	0.380435	0.108696	0.51087	0.211111	0.0555556	0.733333
GH1	9.58128	0.00830715	0.380435	0.108696	0.51087	0.211111	0.0555556	0.733333
CD79B	9.58128	0.00830715	0.380435	0.108696	0.51087	0.211111	0.0555556	0.733333
SCN4A	9.58128	0.00830715	0.380435	0.108696	0.51087	0.211111	0.0555556	0.733333
C17orf72	9.58128	0.00830715	0.380435	0.108696	0.51087	0.211111	0.0555556	0.733333
ICAM2	9.58128	0.00830715	0.380435	0.108696	0.51087	0.211111	0.0555556	0.733333
ERN1	9.58128	0.00830715	0.380435	0.108696	0.51087	0.211111	0.0555556	0.733333
SNORA76.ENSG00000266402.2	9.58128	0.00830715	0.380435	0.108696	0.51087	0.211111	0.0555556	0.733333
SNORD104	9.58128	0.00830715	0.380435	0.108696	0.51087	0.211111	0.0555556	0.733333
RBFOX2	9.57094	0.00835019	0.184783	0.25	0.565217	0.111111	0.111111	0.777778
APOL3	9.55362	0.00842284	0.184783	0.23913	0.576087	0.1	0.111111	0.788889
RN7SKP148	9.53726	0.00849202	0.25	0.184783	0.565217	0.355556	0.0444444	0.6
HRH2	9.53726	0.00849202	0.25	0.184783	0.565217	0.355556	0.0444444	0.6
CPLX2	9.53726	0.00849202	0.25	0.184783	0.565217	0.355556	0.0444444	0.6
THOC3	9.53726	0.00849202	0.25	0.184783	0.565217	0.355556	0.0444444	0.6
FAM153B	9.53726	0.00849202	0.25	0.184783	0.565217	0.355556	0.0444444	0.6
SIMC1	9.53726	0.00849202	0.25	0.184783	0.565217	0.355556	0.0444444	0.6
KIAA1191	9.53726	0.00849202	0.25	0.184783	0.565217	0.355556	0.0444444	0.6
ARL10	9.53726	0.00849202	0.25	0.184783	0.565217	0.355556	0.0444444	0.6
MIR1271	9.53726	0.00849202	0.25	0.184783	0.565217	0.355556	0.0444444	0.6
NOP16	9.53726	0.00849202	0.25	0.184783	0.565217	0.355556	0.0444444	0.6
HIGD2A	9.53726	0.00849202	0.25	0.184783	0.565217	0.355556	0.0444444	0.6
CLTB	9.53726	0.00849202	0.25	0.184783	0.565217	0.355556	0.0444444	0.6
FAF2	9.53726	0.00849202	0.25	0.184783	0.565217	0.355556	0.0444444	0.6
RNF44	9.53726	0.00849202	0.25	0.184783	0.565217	0.355556	0.0444444	0.6
CDHR2	9.53726	0.00849202	0.25	0.184783	0.565217	0.355556	0.0444444	0.6
RN7SL684P	9.53726	0.00849202	0.25	0.184783	0.565217	0.355556	0.0444444	0.6
GPRIN1	9.53726	0.00849202	0.25	0.184783	0.565217	0.355556	0.0444444	0.6
FGFR4	9.53726	0.00849202	0.25	0.184783	0.565217	0.355556	0.0444444	0.6
MXD3	9.53726	0.00849202	0.25	0.184783	0.565217	0.355556	0.0444444	0.6
RAB24	9.53726	0.00849202	0.25	0.184783	0.565217	0.355556	0.0444444	0.6
PRELID1	9.53726	0.00849202	0.25	0.184783	0.565217	0.355556	0.0444444	0.6
LMAN2	9.53726	0.00849202	0.25	0.184783	0.565217	0.355556	0.0444444	0.6
RN7SL562P	9.53726	0.00849202	0.25	0.184783	0.565217	0.355556	0.0444444	0.6
RGS14	9.53726	0.00849202	0.25	0.184783	0.565217	0.355556	0.0444444	0.6
SLC34A1	9.53726	0.00849202	0.25	0.184783	0.565217	0.355556	0.0444444	0.6
F12	9.53726	0.00849202	0.25	0.184783	0.565217	0.355556	0.0444444	0.6
GRK6	9.53726	0.00849202	0.25	0.184783	0.565217	0.355556	0.0444444	0.6
PFN3	9.53726	0.00849202	0.25	0.184783	0.565217	0.355556	0.0444444	0.6
PRR7	9.53726	0.00849202	0.25	0.184783	0.565217	0.355556	0.0444444	0.6
DBN1	9.53726	0.00849202	0.25	0.184783	0.565217	0.355556	0.0444444	0.6
PDLIM7	9.53726	0.00849202	0.25	0.184783	0.565217	0.355556	0.0444444	0.6
DOK3	9.53726	0.00849202	0.25	0.184783	0.565217	0.355556	0.0444444	0.6
DDX41	9.53726	0.00849202	0.25	0.184783	0.565217	0.355556	0.0444444	0.6
FAM193B	9.53726	0.00849202	0.25	0.184783	0.565217	0.355556	0.0444444	0.6
TMED9	9.53726	0.00849202	0.25	0.184783	0.565217	0.355556	0.0444444	0.6
B4GALT7	9.53726	0.00849202	0.25	0.184783	0.565217	0.355556	0.0444444	0.6
FAM153A	9.53726	0.00849202	0.25	0.184783	0.565217	0.355556	0.0444444	0.6
PROP1	9.53726	0.00849202	0.25	0.184783	0.565217	0.355556	0.0444444	0.6
FAM153C	9.53726	0.00849202	0.25	0.184783	0.565217	0.355556	0.0444444	0.6
N4BP3	9.53726	0.00849202	0.25	0.184783	0.565217	0.355556	0.0444444	0.6
RMND5B	9.53726	0.00849202	0.25	0.184783	0.565217	0.355556	0.0444444	0.6
NHP2	9.53726	0.00849202	0.25	0.184783	0.565217	0.355556	0.0444444	0.6
HNRNPAB	9.53726	0.00849202	0.25	0.184783	0.565217	0.355556	0.0444444	0.6
PHYKPL	9.53726	0.00849202	0.25	0.184783	0.565217	0.355556	0.0444444	0.6
IGFBP4	9.53536	0.00850007	0.293478	0.152174	0.554348	0.133333	0.1	0.766667
TNS4	9.53536	0.00850007	0.293478	0.152174	0.554348	0.133333	0.1	0.766667
KRT222	9.53536	0.00850007	0.293478	0.152174	0.554348	0.133333	0.1	0.766667
SMARCE1	9.53536	0.00850007	0.293478	0.152174	0.554348	0.133333	0.1	0.766667
KRT24	9.53536	0.00850007	0.293478	0.152174	0.554348	0.133333	0.1	0.766667
KRT223P	9.53536	0.00850007	0.293478	0.152174	0.554348	0.133333	0.1	0.766667
KRT25	9.53536	0.00850007	0.293478	0.152174	0.554348	0.133333	0.1	0.766667
KRT26	9.53536	0.00850007	0.293478	0.152174	0.554348	0.133333	0.1	0.766667
KRT27	9.53536	0.00850007	0.293478	0.152174	0.554348	0.133333	0.1	0.766667
KRT28	9.53536	0.00850007	0.293478	0.152174	0.554348	0.133333	0.1	0.766667
KRT10	9.53536	0.00850007	0.293478	0.152174	0.554348	0.133333	0.1	0.766667
TMEM99	9.53536	0.00850007	0.293478	0.152174	0.554348	0.133333	0.1	0.766667
KRT12	9.53536	0.00850007	0.293478	0.152174	0.554348	0.133333	0.1	0.766667
KRT20	9.53536	0.00850007	0.293478	0.152174	0.554348	0.133333	0.1	0.766667
KRT23	9.53536	0.00850007	0.293478	0.152174	0.554348	0.133333	0.1	0.766667
KRT39	9.53536	0.00850007	0.293478	0.152174	0.554348	0.133333	0.1	0.766667
KRT40	9.53536	0.00850007	0.293478	0.152174	0.554348	0.133333	0.1	0.766667
KRT33A	9.53536	0.00850007	0.293478	0.152174	0.554348	0.133333	0.1	0.766667
RAB5C	9.53536	0.00850007	0.293478	0.152174	0.554348	0.133333	0.1	0.766667
KCNH4	9.53536	0.00850007	0.293478	0.152174	0.554348	0.133333	0.1	0.766667
HCRT	9.53536	0.00850007	0.293478	0.152174	0.554348	0.133333	0.1	0.766667
GHDC	9.53536	0.00850007	0.293478	0.152174	0.554348	0.133333	0.1	0.766667
STAT5B	9.53536	0.00850007	0.293478	0.152174	0.554348	0.133333	0.1	0.766667
STAT5A	9.53536	0.00850007	0.293478	0.152174	0.554348	0.133333	0.1	0.766667
CAPRIN1	9.53208	0.00851401	0.0869565	0.23913	0.673913	0.0333333	0.1	0.866667
PAMR1	9.53208	0.00851401	0.0869565	0.23913	0.673913	0.0333333	0.1	0.866667
HNRNPKP3	9.53208	0.00851401	0.0869565	0.23913	0.673913	0.0333333	0.1	0.866667
API5	9.53208	0.00851401	0.0869565	0.23913	0.673913	0.0333333	0.1	0.866667
TTC17	9.53208	0.00851401	0.0869565	0.23913	0.673913	0.0333333	0.1	0.866667
RN7SKP287	9.53208	0.00851401	0.0869565	0.23913	0.673913	0.0333333	0.1	0.866667
MIR670	9.53208	0.00851401	0.0869565	0.23913	0.673913	0.0333333	0.1	0.866667
ACCSL	9.53208	0.00851401	0.0869565	0.23913	0.673913	0.0333333	0.1	0.866667
ACCS	9.53208	0.00851401	0.0869565	0.23913	0.673913	0.0333333	0.1	0.866667
EXT2	9.53208	0.00851401	0.0869565	0.23913	0.673913	0.0333333	0.1	0.866667
ALX4	9.53208	0.00851401	0.0869565	0.23913	0.673913	0.0333333	0.1	0.866667
CD82	9.53208	0.00851401	0.0869565	0.23913	0.673913	0.0333333	0.1	0.866667
LINC00670	9.52492	0.00854455	0.0869565	0.576087	0.336957	0	0.544444	0.455556
MYOCD	9.52492	0.00854455	0.0869565	0.576087	0.336957	0	0.544444	0.455556
ARHGAP44	9.52492	0.00854455	0.0869565	0.576087	0.336957	0	0.544444	0.455556
MIR1269B	9.52492	0.00854455	0.0869565	0.576087	0.336957	0	0.544444	0.455556
RN7SL550P	9.52492	0.00854455	0.0869565	0.576087	0.336957	0	0.544444	0.455556
ELAC2	9.52492	0.00854455	0.0869565	0.576087	0.336957	0	0.544444	0.455556
RNF112	9.51988	0.00856612	0.206522	0.369565	0.423913	0.0555556	0.388889	0.555556
FCHSD2	9.51963	0.00856721	0.0978261	0.271739	0.630435	0.0444444	0.122222	0.833333
PTPRJ	9.51043	0.00860668	0.0978261	0.23913	0.663043	0.0555556	0.0888889	0.855556
LARGE	9.50823	0.00861617	0.173913	0.271739	0.554348	0.111111	0.122222	0.766667
MRPL45	9.50458	0.00863189	0.293478	0.152174	0.554348	0.122222	0.122222	0.755556
GPR179	9.50458	0.00863189	0.293478	0.152174	0.554348	0.122222	0.122222	0.755556
SOCS7	9.50458	0.00863189	0.293478	0.152174	0.554348	0.122222	0.122222	0.755556
RN7SL458P	9.50458	0.00863189	0.293478	0.152174	0.554348	0.122222	0.122222	0.755556
ARHGAP23	9.50458	0.00863189	0.293478	0.152174	0.554348	0.122222	0.122222	0.755556
SRCIN1	9.50458	0.00863189	0.293478	0.152174	0.554348	0.122222	0.122222	0.755556
RN7SL102P	9.50458	0.00863189	0.293478	0.152174	0.554348	0.122222	0.122222	0.755556
C17orf96	9.50458	0.00863189	0.293478	0.152174	0.554348	0.122222	0.122222	0.755556
MIR4734	9.50458	0.00863189	0.293478	0.152174	0.554348	0.122222	0.122222	0.755556
MLLT6	9.50458	0.00863189	0.293478	0.152174	0.554348	0.122222	0.122222	0.755556
CISD3	9.50458	0.00863189	0.293478	0.152174	0.554348	0.122222	0.122222	0.755556
MIR4726	9.50458	0.00863189	0.293478	0.152174	0.554348	0.122222	0.122222	0.755556
RNA5SP440	9.50458	0.00863189	0.293478	0.152174	0.554348	0.122222	0.122222	0.755556
PCGF2	9.50458	0.00863189	0.293478	0.152174	0.554348	0.122222	0.122222	0.755556
PSMB3	9.50458	0.00863189	0.293478	0.152174	0.554348	0.122222	0.122222	0.755556
PIP4K2B	9.50458	0.00863189	0.293478	0.152174	0.554348	0.122222	0.122222	0.755556
CWC25	9.50458	0.00863189	0.293478	0.152174	0.554348	0.122222	0.122222	0.755556
MIR4727	9.50458	0.00863189	0.293478	0.152174	0.554348	0.122222	0.122222	0.755556
C17orf98	9.50458	0.00863189	0.293478	0.152174	0.554348	0.122222	0.122222	0.755556
RPL23	9.50458	0.00863189	0.293478	0.152174	0.554348	0.122222	0.122222	0.755556
SNORA21.ENSG00000199293.1	9.50458	0.00863189	0.293478	0.152174	0.554348	0.122222	0.122222	0.755556
SNORA21.ENSG00000252699.1	9.50458	0.00863189	0.293478	0.152174	0.554348	0.122222	0.122222	0.755556
LASP1	9.50458	0.00863189	0.293478	0.152174	0.554348	0.122222	0.122222	0.755556
LINC00672	9.50458	0.00863189	0.293478	0.152174	0.554348	0.122222	0.122222	0.755556
FBXO47	9.50458	0.00863189	0.293478	0.152174	0.554348	0.122222	0.122222	0.755556
LRRC37A11P	9.50458	0.00863189	0.293478	0.152174	0.554348	0.122222	0.122222	0.755556
FBXL20	9.50458	0.00863189	0.293478	0.152174	0.554348	0.122222	0.122222	0.755556
MED1	9.50458	0.00863189	0.293478	0.152174	0.554348	0.122222	0.122222	0.755556
CDK12	9.50458	0.00863189	0.293478	0.152174	0.554348	0.122222	0.122222	0.755556
NEUROD2	9.50458	0.00863189	0.293478	0.152174	0.554348	0.122222	0.122222	0.755556
TCAP	9.50458	0.00863189	0.293478	0.152174	0.554348	0.122222	0.122222	0.755556
PNMT	9.50458	0.00863189	0.293478	0.152174	0.554348	0.122222	0.122222	0.755556
BCAS3	9.48846	0.00870175	0.391304	0.119565	0.48913	0.233333	0.0555556	0.711111
CEP112	9.48846	0.00870175	0.391304	0.119565	0.48913	0.233333	0.0555556	0.711111
POLG2	9.46951	0.00878459	0.391304	0.108696	0.5	0.222222	0.0555556	0.722222
DDX5	9.46951	0.00878459	0.391304	0.108696	0.5	0.222222	0.0555556	0.722222
MIR3064	9.46951	0.00878459	0.391304	0.108696	0.5	0.222222	0.0555556	0.722222
MIR5047	9.46951	0.00878459	0.391304	0.108696	0.5	0.222222	0.0555556	0.722222
CEP95	9.46951	0.00878459	0.391304	0.108696	0.5	0.222222	0.0555556	0.722222
SMURF2	9.46951	0.00878459	0.391304	0.108696	0.5	0.222222	0.0555556	0.722222
PLEKHM1P	9.46951	0.00878459	0.391304	0.108696	0.5	0.222222	0.0555556	0.722222
RN7SL409P	9.46951	0.00878459	0.391304	0.108696	0.5	0.222222	0.0555556	0.722222
LRRC37A3	9.46951	0.00878459	0.391304	0.108696	0.5	0.222222	0.0555556	0.722222
RN7SL404P	9.46951	0.00878459	0.391304	0.108696	0.5	0.222222	0.0555556	0.722222
LIMK2	9.44701	0.008884	0.141304	0.271739	0.586957	0.1	0.111111	0.788889
RPL23A	9.43849	0.0089219	0.304348	0.130435	0.565217	0.144444	0.0777778	0.777778
SNORD42B	9.43849	0.0089219	0.304348	0.130435	0.565217	0.144444	0.0777778	0.777778
SNORD42A	9.43849	0.0089219	0.304348	0.130435	0.565217	0.144444	0.0777778	0.777778
SNORD4A	9.43849	0.0089219	0.304348	0.130435	0.565217	0.144444	0.0777778	0.777778
SNORD4B	9.43849	0.0089219	0.304348	0.130435	0.565217	0.144444	0.0777778	0.777778
TLCD1	9.43849	0.0089219	0.304348	0.130435	0.565217	0.144444	0.0777778	0.777778
NEK8	9.43849	0.0089219	0.304348	0.130435	0.565217	0.144444	0.0777778	0.777778
TRAF4	9.43849	0.0089219	0.304348	0.130435	0.565217	0.144444	0.0777778	0.777778
CHEK2	9.42916	0.00896364	0.152174	0.282609	0.565217	0.0888889	0.133333	0.777778
HSCB	9.42916	0.00896364	0.152174	0.282609	0.565217	0.0888889	0.133333	0.777778
SNORA74.ENSG00000252305.1	9.42788	0.00896938	0.0869565	0.543478	0.369565	0	0.511111	0.488889
CDRT15	9.42788	0.00896938	0.0869565	0.543478	0.369565	0	0.511111	0.488889
CDRT1	9.42788	0.00896938	0.0869565	0.543478	0.369565	0	0.511111	0.488889
CDRT4	9.42788	0.00896938	0.0869565	0.543478	0.369565	0	0.511111	0.488889
CDRT7	9.42788	0.00896938	0.0869565	0.543478	0.369565	0	0.511111	0.488889
CDRT8	9.42788	0.00896938	0.0869565	0.543478	0.369565	0	0.511111	0.488889
HS3ST3B1	9.42788	0.00896938	0.0869565	0.543478	0.369565	0	0.511111	0.488889
MIR4731	9.42788	0.00896938	0.0869565	0.543478	0.369565	0	0.511111	0.488889
PMP22	9.42788	0.00896938	0.0869565	0.543478	0.369565	0	0.511111	0.488889
RN7SL792P	9.42788	0.00896938	0.0869565	0.543478	0.369565	0	0.511111	0.488889
SNORA74.ENSG00000252129.1	9.42788	0.00896938	0.0869565	0.543478	0.369565	0	0.511111	0.488889
TEKT3	9.42788	0.00896938	0.0869565	0.543478	0.369565	0	0.511111	0.488889
TVP23C	9.42788	0.00896938	0.0869565	0.543478	0.369565	0	0.511111	0.488889
snoU13.ENSG00000238806.1	9.42788	0.00896938	0.0869565	0.543478	0.369565	0	0.511111	0.488889
RN7SL633P	9.42399	0.00898682	0.152174	0.271739	0.576087	0.111111	0.111111	0.777778
SMTN	9.42399	0.00898682	0.152174	0.271739	0.576087	0.111111	0.111111	0.777778
INPP5J	9.42399	0.00898682	0.152174	0.271739	0.576087	0.111111	0.111111	0.777778
APOL5	9.42399	0.00898682	0.152174	0.271739	0.576087	0.111111	0.111111	0.777778
ZNF652	9.40327	0.00908043	0.347826	0.108696	0.543478	0.166667	0.0777778	0.755556
PHB	9.40327	0.00908043	0.347826	0.108696	0.543478	0.166667	0.0777778	0.755556
NGFR	9.40327	0.00908043	0.347826	0.108696	0.543478	0.166667	0.0777778	0.755556
MRPL45P2	9.38623	0.00915813	0.326087	0.119565	0.554348	0.155556	0.0777778	0.766667
NPEPPS	9.38623	0.00915813	0.326087	0.119565	0.554348	0.155556	0.0777778	0.766667
RN7SL735P	9.37154	0.00922563	0.402174	0.108696	0.48913	0.233333	0.0555556	0.711111
MIR4316	9.34666	0.00934112	0.423913	0.108696	0.467391	0.233333	0.0777778	0.688889
FLJ45079	9.34666	0.00934112	0.423913	0.108696	0.467391	0.233333	0.0777778	0.688889
TNRC6C	9.34666	0.00934112	0.423913	0.108696	0.467391	0.233333	0.0777778	0.688889
TMC6	9.34666	0.00934112	0.423913	0.108696	0.467391	0.233333	0.0777778	0.688889
TMC8	9.34666	0.00934112	0.423913	0.108696	0.467391	0.233333	0.0777778	0.688889
C17orf99	9.34666	0.00934112	0.423913	0.108696	0.467391	0.233333	0.0777778	0.688889
SYNGR2	9.34666	0.00934112	0.423913	0.108696	0.467391	0.233333	0.0777778	0.688889
TK1	9.34666	0.00934112	0.423913	0.108696	0.467391	0.233333	0.0777778	0.688889
AFMID	9.34666	0.00934112	0.423913	0.108696	0.467391	0.233333	0.0777778	0.688889
BIRC5	9.34666	0.00934112	0.423913	0.108696	0.467391	0.233333	0.0777778	0.688889
TMEM235	9.34666	0.00934112	0.423913	0.108696	0.467391	0.233333	0.0777778	0.688889
SOCS3	9.34666	0.00934112	0.423913	0.108696	0.467391	0.233333	0.0777778	0.688889
RN7SL236P	9.34666	0.00934112	0.423913	0.108696	0.467391	0.233333	0.0777778	0.688889
PGS1	9.34666	0.00934112	0.423913	0.108696	0.467391	0.233333	0.0777778	0.688889
SNORA30.ENSG00000200063.1	9.34666	0.00934112	0.423913	0.108696	0.467391	0.233333	0.0777778	0.688889
DNAH17	9.34666	0.00934112	0.423913	0.108696	0.467391	0.233333	0.0777778	0.688889
USP36	9.34666	0.00934112	0.423913	0.108696	0.467391	0.233333	0.0777778	0.688889
TIMP2	9.34666	0.00934112	0.423913	0.108696	0.467391	0.233333	0.0777778	0.688889
DDC8	9.34666	0.00934112	0.423913	0.108696	0.467391	0.233333	0.0777778	0.688889
LGALS3BP	9.34666	0.00934112	0.423913	0.108696	0.467391	0.233333	0.0777778	0.688889
CANT1	9.34666	0.00934112	0.423913	0.108696	0.467391	0.233333	0.0777778	0.688889
C1QTNF1	9.34666	0.00934112	0.423913	0.108696	0.467391	0.233333	0.0777778	0.688889
ENGASE	9.34666	0.00934112	0.423913	0.108696	0.467391	0.233333	0.0777778	0.688889
RBFOX3	9.34666	0.00934112	0.423913	0.108696	0.467391	0.233333	0.0777778	0.688889
P2RX3	9.34046	0.00937014	0.0543478	0.25	0.695652	0.0111111	0.111111	0.877778
PRG3	9.34046	0.00937014	0.0543478	0.25	0.695652	0.0111111	0.111111	0.877778
PRG2	9.34046	0.00937014	0.0543478	0.25	0.695652	0.0111111	0.111111	0.877778
SLC43A3	9.34046	0.00937014	0.0543478	0.25	0.695652	0.0111111	0.111111	0.877778
RNA5SP341	9.34046	0.00937014	0.0543478	0.25	0.695652	0.0111111	0.111111	0.877778
RN7SKP259	9.34046	0.00937014	0.0543478	0.25	0.695652	0.0111111	0.111111	0.877778
RTN4RL2	9.34046	0.00937014	0.0543478	0.25	0.695652	0.0111111	0.111111	0.877778
SLC43A1	9.34046	0.00937014	0.0543478	0.25	0.695652	0.0111111	0.111111	0.877778
CPEB4	9.34011	0.00937177	0.23913	0.184783	0.576087	0.333333	0.0444444	0.622222
C5orf47	9.34011	0.00937177	0.23913	0.184783	0.576087	0.333333	0.0444444	0.622222
NSG2	9.34011	0.00937177	0.23913	0.184783	0.576087	0.333333	0.0444444	0.622222
C22orf31	9.33289	0.00940565	0.163043	0.271739	0.565217	0.0888889	0.133333	0.777778
C5orf50	9.30844	0.00952136	0.25	0.206522	0.543478	0.333333	0.0555556	0.611111
FBXW11	9.30844	0.00952136	0.25	0.206522	0.543478	0.333333	0.0555556	0.611111
MSL1	9.29967	0.00956318	0.304348	0.152174	0.543478	0.144444	0.1	0.755556
CASC3	9.29967	0.00956318	0.304348	0.152174	0.543478	0.144444	0.1	0.755556
RAPGEFL1	9.29967	0.00956318	0.304348	0.152174	0.543478	0.144444	0.1	0.755556
SFXN1	9.29606	0.00958045	0.25	0.184783	0.565217	0.344444	0.0444444	0.611111
RN7SKP60	9.25939	0.00975774	0.228261	0.195652	0.576087	0.344444	0.0555556	0.6
BOD1	9.25533	0.00977756	0.26087	0.184783	0.554348	0.355556	0.0444444	0.6
SNCB	9.25533	0.00977756	0.26087	0.184783	0.554348	0.355556	0.0444444	0.6
EIF4E1B	9.25533	0.00977756	0.26087	0.184783	0.554348	0.355556	0.0444444	0.6
HK3	9.25533	0.00977756	0.26087	0.184783	0.554348	0.355556	0.0444444	0.6
MIR4281	9.25533	0.00977756	0.26087	0.184783	0.554348	0.355556	0.0444444	0.6
TSPAN17	9.25533	0.00977756	0.26087	0.184783	0.554348	0.355556	0.0444444	0.6
UNC5A	9.25533	0.00977756	0.26087	0.184783	0.554348	0.355556	0.0444444	0.6
NSD1	9.25533	0.00977756	0.26087	0.184783	0.554348	0.355556	0.0444444	0.6
CNTN3	9.25308	0.00978858	0.108696	0.23913	0.652174	0.1	0.0777778	0.822222
ROBO2	9.25308	0.00978858	0.108696	0.23913	0.652174	0.1	0.0777778	0.822222
RHOD	9.25308	0.00978858	0.108696	0.23913	0.652174	0.1	0.0777778	0.822222
MIR3186	9.23079	0.00989827	0.402174	0.130435	0.467391	0.244444	0.0666667	0.688889
ACTG1	9.23079	0.00989827	0.402174	0.130435	0.467391	0.244444	0.0666667	0.688889
FSCN2	9.23079	0.00989827	0.402174	0.130435	0.467391	0.244444	0.0666667	0.688889
C17orf70	9.23079	0.00989827	0.402174	0.130435	0.467391	0.244444	0.0666667	0.688889
NPLOC4	9.23079	0.00989827	0.402174	0.130435	0.467391	0.244444	0.0666667	0.688889
TSPAN10	9.23079	0.00989827	0.402174	0.130435	0.467391	0.244444	0.0666667	0.688889
CCR7	9.2155	0.00997424	0.293478	0.152174	0.554348	0.144444	0.0888889	0.766667
ZNF385C	9.2155	0.00997424	0.293478	0.152174	0.554348	0.144444	0.0888889	0.766667
STAT3	9.2155	0.00997424	0.293478	0.152174	0.554348	0.144444	0.0888889	0.766667
ACOX1	9.21293	0.00998707	0.423913	0.108696	0.467391	0.255556	0.0555556	0.688889
AANAT	9.21293	0.00998707	0.423913	0.108696	0.467391	0.255556	0.0555556	0.688889
MGAT5B	9.21293	0.00998707	0.423913	0.108696	0.467391	0.255556	0.0555556	0.688889
ZNF18	9.20736	0.0100149	0.0869565	0.576087	0.336957	0	0.555556	0.444444
RPL21P122	9.20736	0.0100149	0.0869565	0.576087	0.336957	0	0.555556	0.444444
MAP2K4	9.20736	0.0100149	0.0869565	0.576087	0.336957	0	0.555556	0.444444
MIR744	9.20736	0.0100149	0.0869565	0.576087	0.336957	0	0.555556	0.444444
RHBDF2	9.15493	0.0102809	0.423913	0.108696	0.467391	0.244444	0.0666667	0.688889
CYGB	9.15493	0.0102809	0.423913	0.108696	0.467391	0.244444	0.0666667	0.688889
PRCD	9.15493	0.0102809	0.423913	0.108696	0.467391	0.244444	0.0666667	0.688889
SNHG16	9.15493	0.0102809	0.423913	0.108696	0.467391	0.244444	0.0666667	0.688889
SNORD1B	9.15493	0.0102809	0.423913	0.108696	0.467391	0.244444	0.0666667	0.688889
ST6GALNAC2	9.15493	0.0102809	0.423913	0.108696	0.467391	0.244444	0.0666667	0.688889
MIR4740	9.15448	0.0102833	0.413043	0.119565	0.467391	0.244444	0.0666667	0.688889
LINC00870	9.15114	0.0103004	0.108696	0.25	0.641304	0.0888889	0.0888889	0.822222
TBKBP1	9.14972	0.0103078	0.326087	0.119565	0.554348	0.166667	0.0666667	0.766667
TBX21	9.14972	0.0103078	0.326087	0.119565	0.554348	0.166667	0.0666667	0.766667
OSBPL7	9.14972	0.0103078	0.326087	0.119565	0.554348	0.166667	0.0666667	0.766667
MRPL10	9.14972	0.0103078	0.326087	0.119565	0.554348	0.166667	0.0666667	0.766667
LRRC46	9.14972	0.0103078	0.326087	0.119565	0.554348	0.166667	0.0666667	0.766667
SCRN2	9.14972	0.0103078	0.326087	0.119565	0.554348	0.166667	0.0666667	0.766667
SP6	9.14972	0.0103078	0.326087	0.119565	0.554348	0.166667	0.0666667	0.766667
SP2	9.14972	0.0103078	0.326087	0.119565	0.554348	0.166667	0.0666667	0.766667
PNPO	9.14972	0.0103078	0.326087	0.119565	0.554348	0.166667	0.0666667	0.766667
PRR15L	9.14972	0.0103078	0.326087	0.119565	0.554348	0.166667	0.0666667	0.766667
CDK5RAP3	9.14972	0.0103078	0.326087	0.119565	0.554348	0.166667	0.0666667	0.766667
COPZ2	9.14972	0.0103078	0.326087	0.119565	0.554348	0.166667	0.0666667	0.766667
MIR152	9.14972	0.0103078	0.326087	0.119565	0.554348	0.166667	0.0666667	0.766667
NFE2L1	9.14972	0.0103078	0.326087	0.119565	0.554348	0.166667	0.0666667	0.766667
CBX1	9.14972	0.0103078	0.326087	0.119565	0.554348	0.166667	0.0666667	0.766667
C1QTNF6	9.1484	0.0103145	0.173913	0.23913	0.586957	0.133333	0.0888889	0.777778
SSTR3	9.1484	0.0103145	0.173913	0.23913	0.586957	0.133333	0.0888889	0.777778
RAC2	9.1484	0.0103145	0.173913	0.23913	0.586957	0.133333	0.0888889	0.777778
FLOT2	9.14579	0.010328	0.304348	0.141304	0.554348	0.155556	0.0777778	0.766667
PIK3IP1	9.14279	0.0103435	0.152174	0.26087	0.586957	0.1	0.111111	0.788889
RNA5SP496	9.14279	0.0103435	0.152174	0.26087	0.586957	0.1	0.111111	0.788889
PISD	9.14279	0.0103435	0.152174	0.26087	0.586957	0.1	0.111111	0.788889
APOL6	9.14279	0.0103435	0.152174	0.26087	0.586957	0.1	0.111111	0.788889
MB	9.14279	0.0103435	0.152174	0.26087	0.586957	0.1	0.111111	0.788889
SEC14L6	9.13707	0.0103731	0.141304	0.282609	0.576087	0.1	0.122222	0.777778
GAL3ST1	9.13707	0.0103731	0.141304	0.282609	0.576087	0.1	0.122222	0.777778
PES1	9.13707	0.0103731	0.141304	0.282609	0.576087	0.1	0.122222	0.777778
FOXRED2	9.12735	0.0104237	0.173913	0.23913	0.586957	0.111111	0.1	0.788889
EIF3D	9.12735	0.0104237	0.173913	0.23913	0.586957	0.111111	0.1	0.788889
CACNG2	9.12735	0.0104237	0.173913	0.23913	0.586957	0.111111	0.1	0.788889
IFT27	9.12735	0.0104237	0.173913	0.23913	0.586957	0.111111	0.1	0.788889
PVALB	9.12735	0.0104237	0.173913	0.23913	0.586957	0.111111	0.1	0.788889
COX10	9.12386	0.0104419	0.0869565	0.543478	0.369565	0	0.522222	0.477778
TRIM16	9.12386	0.0104419	0.0869565	0.543478	0.369565	0	0.522222	0.477778
RN7SL647P	9.11947	0.0104648	0.119565	0.228261	0.652174	0.0888889	0.0777778	0.833333
RN7SKP61	9.11947	0.0104648	0.119565	0.228261	0.652174	0.0888889	0.0777778	0.833333
TOM1	9.09342	0.010602	0.163043	0.26087	0.576087	0.111111	0.111111	0.777778
MIR3909	9.09342	0.010602	0.163043	0.26087	0.576087	0.111111	0.111111	0.777778
HMOX1	9.09342	0.010602	0.163043	0.26087	0.576087	0.111111	0.111111	0.777778
RN7SL680P	9.08398	0.0106522	0.326087	0.076087	0.597826	0.255556	0	0.744444
RN7SL194P	9.08398	0.0106522	0.326087	0.076087	0.597826	0.255556	0	0.744444
SNORD112.ENSG00000252434.1	9.08398	0.0106522	0.326087	0.076087	0.597826	0.255556	0	0.744444
MAFB	9.08398	0.0106522	0.326087	0.076087	0.597826	0.255556	0	0.744444
RNA5SP484	9.08398	0.0106522	0.326087	0.076087	0.597826	0.255556	0	0.744444
CHD6	9.08398	0.0106522	0.326087	0.076087	0.597826	0.255556	0	0.744444
LPXN	9.0701	0.0107264	0.0543478	0.26087	0.684783	0.0111111	0.122222	0.866667
ZFP91	9.0701	0.0107264	0.0543478	0.26087	0.684783	0.0111111	0.122222	0.866667
CNTF	9.0701	0.0107264	0.0543478	0.26087	0.684783	0.0111111	0.122222	0.866667
GLYAT	9.0701	0.0107264	0.0543478	0.26087	0.684783	0.0111111	0.122222	0.866667
GLYATL2	9.0701	0.0107264	0.0543478	0.26087	0.684783	0.0111111	0.122222	0.866667
GLYATL1P2	9.0701	0.0107264	0.0543478	0.26087	0.684783	0.0111111	0.122222	0.866667
GLYATL1	9.0701	0.0107264	0.0543478	0.26087	0.684783	0.0111111	0.122222	0.866667
FASN	9.06643	0.0107461	0.413043	0.130435	0.456522	0.244444	0.0777778	0.677778
B3GNTL1	9.06643	0.0107461	0.413043	0.130435	0.456522	0.244444	0.0777778	0.677778
METRNL	9.06643	0.0107461	0.413043	0.130435	0.456522	0.244444	0.0777778	0.677778
FLII	9.05456	0.01081	0.195652	0.413043	0.391304	0.0555556	0.411111	0.533333
SMCR7	9.05456	0.01081	0.195652	0.413043	0.391304	0.0555556	0.411111	0.533333
TOP3A	9.05456	0.01081	0.195652	0.413043	0.391304	0.0555556	0.411111	0.533333
SMCR8	9.05456	0.01081	0.195652	0.413043	0.391304	0.0555556	0.411111	0.533333
SHMT1	9.05456	0.01081	0.195652	0.413043	0.391304	0.0555556	0.411111	0.533333
EVPLL	9.05456	0.01081	0.195652	0.413043	0.391304	0.0555556	0.411111	0.533333
CCDC144B	9.05456	0.01081	0.195652	0.413043	0.391304	0.0555556	0.411111	0.533333
FAM106A	9.05456	0.01081	0.195652	0.413043	0.391304	0.0555556	0.411111	0.533333
KRT16P1	9.05456	0.01081	0.195652	0.413043	0.391304	0.0555556	0.411111	0.533333
KRT17P2	9.05456	0.01081	0.195652	0.413043	0.391304	0.0555556	0.411111	0.533333
LGALS9C	9.05456	0.01081	0.195652	0.413043	0.391304	0.0555556	0.411111	0.533333
RN7SL639P	9.05456	0.01081	0.195652	0.413043	0.391304	0.0555556	0.411111	0.533333
TBC1D28	9.05456	0.01081	0.195652	0.413043	0.391304	0.0555556	0.411111	0.533333
USP32P2	9.05456	0.01081	0.195652	0.413043	0.391304	0.0555556	0.411111	0.533333
ZNF286B	9.05456	0.01081	0.195652	0.413043	0.391304	0.0555556	0.411111	0.533333
GOSR2	9.04067	0.0108854	0.326087	0.130435	0.543478	0.166667	0.0777778	0.755556
MIR5089	9.04067	0.0108854	0.326087	0.130435	0.543478	0.166667	0.0777778	0.755556
LRRC37A17P	9.04067	0.0108854	0.326087	0.130435	0.543478	0.166667	0.0777778	0.755556
RPRML	9.04067	0.0108854	0.326087	0.130435	0.543478	0.166667	0.0777778	0.755556
NAGLU	9.02791	0.0109551	0.304348	0.152174	0.543478	0.155556	0.0888889	0.755556
HSD17B1	9.02791	0.0109551	0.304348	0.152174	0.543478	0.155556	0.0888889	0.755556
COASY	9.02791	0.0109551	0.304348	0.152174	0.543478	0.155556	0.0888889	0.755556
MLX	9.02791	0.0109551	0.304348	0.152174	0.543478	0.155556	0.0888889	0.755556
PSMC3IP	9.02791	0.0109551	0.304348	0.152174	0.543478	0.155556	0.0888889	0.755556
FAM134C	9.02791	0.0109551	0.304348	0.152174	0.543478	0.155556	0.0888889	0.755556
TUBG1	9.02791	0.0109551	0.304348	0.152174	0.543478	0.155556	0.0888889	0.755556
TUBG2	9.02791	0.0109551	0.304348	0.152174	0.543478	0.155556	0.0888889	0.755556
CCR10	9.02791	0.0109551	0.304348	0.152174	0.543478	0.155556	0.0888889	0.755556
PLEKHH3	9.02791	0.0109551	0.304348	0.152174	0.543478	0.155556	0.0888889	0.755556
NBR2	9.02791	0.0109551	0.304348	0.152174	0.543478	0.155556	0.0888889	0.755556
NBR1	9.02791	0.0109551	0.304348	0.152174	0.543478	0.155556	0.0888889	0.755556
ARL4D	9.02791	0.0109551	0.304348	0.152174	0.543478	0.155556	0.0888889	0.755556
LINC00854	9.02791	0.0109551	0.304348	0.152174	0.543478	0.155556	0.0888889	0.755556
LINC00910	9.02791	0.0109551	0.304348	0.152174	0.543478	0.155556	0.0888889	0.755556
TMEM106A	9.02791	0.0109551	0.304348	0.152174	0.543478	0.155556	0.0888889	0.755556
MIR2117	9.02791	0.0109551	0.304348	0.152174	0.543478	0.155556	0.0888889	0.755556
DHX8	9.02791	0.0109551	0.304348	0.152174	0.543478	0.155556	0.0888889	0.755556
ETV4	9.02791	0.0109551	0.304348	0.152174	0.543478	0.155556	0.0888889	0.755556
C17orf53	9.02791	0.0109551	0.304348	0.152174	0.543478	0.155556	0.0888889	0.755556
ASB16	9.02791	0.0109551	0.304348	0.152174	0.543478	0.155556	0.0888889	0.755556
TMUB2	9.02791	0.0109551	0.304348	0.152174	0.543478	0.155556	0.0888889	0.755556
ATXN7L3	9.02791	0.0109551	0.304348	0.152174	0.543478	0.155556	0.0888889	0.755556
UBTF	9.02791	0.0109551	0.304348	0.152174	0.543478	0.155556	0.0888889	0.755556
SLC4A1	9.02791	0.0109551	0.304348	0.152174	0.543478	0.155556	0.0888889	0.755556
RN7SL507P	9.02791	0.0109551	0.304348	0.152174	0.543478	0.155556	0.0888889	0.755556
RUNDC3A	9.02791	0.0109551	0.304348	0.152174	0.543478	0.155556	0.0888889	0.755556
U3.ENSG00000221496.1	9.02791	0.0109551	0.304348	0.152174	0.543478	0.155556	0.0888889	0.755556
ANKRD42	9.0264	0.0109633	0.0652174	0.293478	0.641304	0.0444444	0.122222	0.833333
CCDC90B	9.0264	0.0109633	0.0652174	0.293478	0.641304	0.0444444	0.122222	0.833333
CAMLG	9.01636	0.0110185	0.217391	0.195652	0.586957	0.322222	0.0555556	0.622222
DDX46	9.01636	0.0110185	0.217391	0.195652	0.586957	0.322222	0.0555556	0.622222
AOC3	8.97725	0.0112361	0.293478	0.163043	0.543478	0.155556	0.0888889	0.755556
AOC4P	8.97725	0.0112361	0.293478	0.163043	0.543478	0.155556	0.0888889	0.755556
LINC00671	8.97725	0.0112361	0.293478	0.163043	0.543478	0.155556	0.0888889	0.755556
G6PC	8.97725	0.0112361	0.293478	0.163043	0.543478	0.155556	0.0888889	0.755556
RNY4P2	8.97725	0.0112361	0.293478	0.163043	0.543478	0.155556	0.0888889	0.755556
SNORA40.ENSG00000212149.1	8.97725	0.0112361	0.293478	0.163043	0.543478	0.155556	0.0888889	0.755556
AARSD1	8.97725	0.0112361	0.293478	0.163043	0.543478	0.155556	0.0888889	0.755556
PTGES3L	8.97725	0.0112361	0.293478	0.163043	0.543478	0.155556	0.0888889	0.755556
RUNDC1	8.97725	0.0112361	0.293478	0.163043	0.543478	0.155556	0.0888889	0.755556
RPL27	8.97725	0.0112361	0.293478	0.163043	0.543478	0.155556	0.0888889	0.755556
IFI35	8.97725	0.0112361	0.293478	0.163043	0.543478	0.155556	0.0888889	0.755556
VAT1	8.97725	0.0112361	0.293478	0.163043	0.543478	0.155556	0.0888889	0.755556
RND2	8.97725	0.0112361	0.293478	0.163043	0.543478	0.155556	0.0888889	0.755556
BRCA1	8.97725	0.0112361	0.293478	0.163043	0.543478	0.155556	0.0888889	0.755556
PRR5	8.97588	0.0112438	0.184783	0.271739	0.543478	0.1	0.144444	0.755556
ARHGAP8	8.97588	0.0112438	0.184783	0.271739	0.543478	0.1	0.144444	0.755556
PHF21B	8.97588	0.0112438	0.184783	0.271739	0.543478	0.1	0.144444	0.755556
TMEM86A	8.93288	0.0114881	0.108696	0.23913	0.652174	0.0444444	0.111111	0.844444
IGSF22	8.93288	0.0114881	0.108696	0.23913	0.652174	0.0444444	0.111111	0.844444
PTPN5	8.93288	0.0114881	0.108696	0.23913	0.652174	0.0444444	0.111111	0.844444
MRGPRX1	8.93288	0.0114881	0.108696	0.23913	0.652174	0.0444444	0.111111	0.844444
MRGPRX2	8.93288	0.0114881	0.108696	0.23913	0.652174	0.0444444	0.111111	0.844444
ZDHHC13	8.93288	0.0114881	0.108696	0.23913	0.652174	0.0444444	0.111111	0.844444
EIF4ENIF1	8.91231	0.0116069	0.163043	0.25	0.586957	0.1	0.111111	0.788889
SFI1	8.91231	0.0116069	0.163043	0.25	0.586957	0.1	0.111111	0.788889
MYRF	8.90851	0.011629	0.0434783	0.271739	0.684783	0.0444444	0.1	0.855556
TMEM258	8.90851	0.011629	0.0434783	0.271739	0.684783	0.0444444	0.1	0.855556
FADS2	8.90851	0.011629	0.0434783	0.271739	0.684783	0.0444444	0.1	0.855556
FEN1	8.90851	0.011629	0.0434783	0.271739	0.684783	0.0444444	0.1	0.855556
MIR611	8.90851	0.011629	0.0434783	0.271739	0.684783	0.0444444	0.1	0.855556
FADS1	8.90851	0.011629	0.0434783	0.271739	0.684783	0.0444444	0.1	0.855556
MIR1908	8.90851	0.011629	0.0434783	0.271739	0.684783	0.0444444	0.1	0.855556
WFIKKN2	8.8922	0.0117242	0.358696	0.108696	0.532609	0.188889	0.0666667	0.744444
TOB1	8.8922	0.0117242	0.358696	0.108696	0.532609	0.188889	0.0666667	0.744444
NUP50	8.87476	0.0118269	0.195652	0.271739	0.532609	0.1	0.155556	0.744444
MIR1249	8.87476	0.0118269	0.195652	0.271739	0.532609	0.1	0.155556	0.744444
UPK3A	8.87476	0.0118269	0.195652	0.271739	0.532609	0.1	0.155556	0.744444
ASCC2	8.86009	0.011914	0.152174	0.271739	0.576087	0.1	0.122222	0.777778
MTMR3	8.86009	0.011914	0.152174	0.271739	0.576087	0.1	0.122222	0.777778
HORMAD2	8.86009	0.011914	0.152174	0.271739	0.576087	0.1	0.122222	0.777778
PRR14L	8.86009	0.011914	0.152174	0.271739	0.576087	0.1	0.122222	0.777778
DEPDC5	8.86009	0.011914	0.152174	0.271739	0.576087	0.1	0.122222	0.777778
RN7SL20P	8.86009	0.011914	0.152174	0.271739	0.576087	0.1	0.122222	0.777778
RNA5SP497	8.83451	0.0120673	0.173913	0.25	0.576087	0.111111	0.111111	0.777778
TIMP3	8.83451	0.0120673	0.173913	0.25	0.576087	0.111111	0.111111	0.777778
MIR4764	8.83451	0.0120673	0.173913	0.25	0.576087	0.111111	0.111111	0.777778
ATXN10	8.83373	0.012072	0.184783	0.282609	0.532609	0.1	0.155556	0.744444
MIR4762	8.83373	0.012072	0.184783	0.282609	0.532609	0.1	0.155556	0.744444
KRT16P3	8.7826	0.0123846	0.184783	0.358696	0.456522	0.0555556	0.322222	0.622222
LGALS9B	8.7826	0.0123846	0.184783	0.358696	0.456522	0.0555556	0.322222	0.622222
NOS2P3	8.7826	0.0123846	0.184783	0.358696	0.456522	0.0555556	0.322222	0.622222
PDZRN3	8.77463	0.0124341	0.108696	0.25	0.641304	0.1	0.0888889	0.811111
MIR1284	8.75865	0.0125338	0.0978261	0.25	0.652174	0.0888889	0.0888889	0.822222
EIF4E3	8.75865	0.0125338	0.0978261	0.25	0.652174	0.0888889	0.0888889	0.822222
GPR27	8.75865	0.0125338	0.0978261	0.25	0.652174	0.0888889	0.0888889	0.822222
PROK2	8.75865	0.0125338	0.0978261	0.25	0.652174	0.0888889	0.0888889	0.822222
RN7SL271P	8.75865	0.0125338	0.0978261	0.25	0.652174	0.0888889	0.0888889	0.822222
RYBP	8.75865	0.0125338	0.0978261	0.25	0.652174	0.0888889	0.0888889	0.822222
snoU13.ENSG00000238568.1	8.75865	0.0125338	0.0978261	0.25	0.652174	0.0888889	0.0888889	0.822222
AXIN2	8.75157	0.0125783	0.369565	0.119565	0.51087	0.222222	0.0555556	0.722222
APOL4	8.75108	0.0125814	0.173913	0.23913	0.586957	0.1	0.111111	0.788889
TRIM16L	8.75043	0.0125854	0.195652	0.402174	0.402174	0.0555556	0.411111	0.533333
FBXW10	8.75043	0.0125854	0.195652	0.402174	0.402174	0.0555556	0.411111	0.533333
TVP23B	8.75043	0.0125854	0.195652	0.402174	0.402174	0.0555556	0.411111	0.533333
RN7SL627P	8.75043	0.0125854	0.195652	0.402174	0.402174	0.0555556	0.411111	0.533333
EGR1	8.71655	0.0128004	0.23913	0.173913	0.586957	0.344444	0.0444444	0.611111
ETF1	8.71655	0.0128004	0.23913	0.173913	0.586957	0.344444	0.0444444	0.611111
SNORD63.ENSG00000222937.1	8.71655	0.0128004	0.23913	0.173913	0.586957	0.344444	0.0444444	0.611111
SNORD63.ENSG00000206989.1	8.71655	0.0128004	0.23913	0.173913	0.586957	0.344444	0.0444444	0.611111
UHRF1BP1L	8.70849	0.0128522	0.23913	0.108696	0.652174	0.0888889	0.0777778	0.833333
GOLGA2B	8.70849	0.0128522	0.23913	0.108696	0.652174	0.0888889	0.0777778	0.833333
RN7SL176P	8.70849	0.0128522	0.23913	0.108696	0.652174	0.0888889	0.0777778	0.833333
ACTR6	8.70849	0.0128522	0.23913	0.108696	0.652174	0.0888889	0.0777778	0.833333
DEPDC4	8.70849	0.0128522	0.23913	0.108696	0.652174	0.0888889	0.0777778	0.833333
TRIM44	8.69982	0.012908	0.0652174	0.25	0.684783	0.0333333	0.1	0.866667
SEC24A	8.68947	0.012975	0.228261	0.195652	0.576087	0.322222	0.0555556	0.622222
B9D1	8.68645	0.0129946	0.195652	0.380435	0.423913	0.0555556	0.388889	0.555556
MIR1180	8.68645	0.0129946	0.195652	0.380435	0.423913	0.0555556	0.388889	0.555556
MAPK7	8.68645	0.0129946	0.195652	0.380435	0.423913	0.0555556	0.388889	0.555556
MFAP4	8.68645	0.0129946	0.195652	0.380435	0.423913	0.0555556	0.388889	0.555556
POM121L9P	8.67703	0.0130559	0.141304	0.282609	0.576087	0.0888889	0.133333	0.777778
SPECC1L	8.67703	0.0130559	0.141304	0.282609	0.576087	0.0888889	0.133333	0.777778
TENM2	8.67167	0.0130909	0.228261	0.206522	0.565217	0.344444	0.0666667	0.588889
MLXIP	8.65733	0.0131851	0.217391	0.141304	0.641304	0.0777778	0.1	0.822222
LRRC43	8.65733	0.0131851	0.217391	0.141304	0.641304	0.0777778	0.1	0.822222
IL31	8.65733	0.0131851	0.217391	0.141304	0.641304	0.0777778	0.1	0.822222
SNORA26.ENSG00000212224.1	8.65511	0.0131998	0.315217	0.076087	0.608696	0.255556	0	0.744444
JPH2	8.65511	0.0131998	0.315217	0.076087	0.608696	0.255556	0	0.744444
OSER1	8.65511	0.0131998	0.315217	0.076087	0.608696	0.255556	0	0.744444
DHX35	8.64573	0.0132618	0.326087	0.076087	0.597826	0.266667	0	0.733333
TOP1	8.64573	0.0132618	0.326087	0.076087	0.597826	0.266667	0	0.733333
RN7SL615P	8.64573	0.0132618	0.326087	0.076087	0.597826	0.266667	0	0.733333
LPIN3	8.64573	0.0132618	0.326087	0.076087	0.597826	0.266667	0	0.733333
EMILIN3	8.64573	0.0132618	0.326087	0.076087	0.597826	0.266667	0	0.733333
MIR3646	8.64573	0.0132618	0.326087	0.076087	0.597826	0.266667	0	0.733333
RN7SL672P	8.63394	0.0133402	0.347826	0.076087	0.576087	0.288889	0	0.711111
FAM65C	8.63394	0.0133402	0.347826	0.076087	0.576087	0.288889	0	0.711111
MIR645	8.63394	0.0133402	0.347826	0.076087	0.576087	0.288889	0	0.711111
RN7SL636P	8.63124	0.0133583	0.358696	0.076087	0.565217	0.3	0	0.7
INTS2	8.6295	0.0133699	0.380435	0.108696	0.51087	0.222222	0.0555556	0.722222
MILR1	8.6295	0.0133699	0.380435	0.108696	0.51087	0.222222	0.0555556	0.722222
SLC16A6P1	8.6295	0.0133699	0.380435	0.108696	0.51087	0.222222	0.0555556	0.722222
AMZ2P1	8.6295	0.0133699	0.380435	0.108696	0.51087	0.222222	0.0555556	0.722222
GNA13	8.6295	0.0133699	0.380435	0.108696	0.51087	0.222222	0.0555556	0.722222
HIPK3	8.62642	0.0133905	0.076087	0.23913	0.684783	0.0333333	0.1	0.866667
KIAA1549L	8.62642	0.0133905	0.076087	0.23913	0.684783	0.0333333	0.1	0.866667
C11orf91	8.62642	0.0133905	0.076087	0.23913	0.684783	0.0333333	0.1	0.866667
CD59	8.62642	0.0133905	0.076087	0.23913	0.684783	0.0333333	0.1	0.866667
FBXO3	8.62642	0.0133905	0.076087	0.23913	0.684783	0.0333333	0.1	0.866667
LMO2	8.62642	0.0133905	0.076087	0.23913	0.684783	0.0333333	0.1	0.866667
NAT10	8.62642	0.0133905	0.076087	0.23913	0.684783	0.0333333	0.1	0.866667
FJX1	8.62642	0.0133905	0.076087	0.23913	0.684783	0.0333333	0.1	0.866667
MIR3973	8.62642	0.0133905	0.076087	0.23913	0.684783	0.0333333	0.1	0.866667
SNORA31.ENSG00000251838.1	8.62642	0.0133905	0.076087	0.23913	0.684783	0.0333333	0.1	0.866667
KCNJ12	8.62278	0.0134149	0.228261	0.326087	0.445652	0.1	0.255556	0.644444
SMCR2	8.60332	0.0135461	0.152174	0.456522	0.391304	0.0333333	0.444444	0.522222
RAI1	8.60332	0.0135461	0.152174	0.456522	0.391304	0.0333333	0.444444	0.522222
TMX2	8.59744	0.013586	0.0652174	0.23913	0.695652	0.0111111	0.122222	0.866667
SMCR5	8.57023	0.013772	0.152174	0.445652	0.402174	0.0333333	0.433333	0.533333
MIR33B	8.57023	0.013772	0.152174	0.445652	0.402174	0.0333333	0.433333	0.533333
SREBF1	8.57023	0.013772	0.152174	0.445652	0.402174	0.0333333	0.433333	0.533333
TBC1D3F	8.55347	0.0138879	0.282609	0.152174	0.565217	0.122222	0.122222	0.755556
TBC1D3	8.55347	0.0138879	0.282609	0.152174	0.565217	0.122222	0.122222	0.755556
AIFM3	8.5498	0.0139134	0.141304	0.282609	0.576087	0.111111	0.122222	0.766667
ARVCF	8.5498	0.0139134	0.141304	0.282609	0.576087	0.111111	0.122222	0.766667
BCRP2	8.5498	0.0139134	0.141304	0.282609	0.576087	0.111111	0.122222	0.766667
C22orf29	8.5498	0.0139134	0.141304	0.282609	0.576087	0.111111	0.122222	0.766667
C22orf39	8.5498	0.0139134	0.141304	0.282609	0.576087	0.111111	0.122222	0.766667
CCDC116	8.5498	0.0139134	0.141304	0.282609	0.576087	0.111111	0.122222	0.766667
CDC45	8.5498	0.0139134	0.141304	0.282609	0.576087	0.111111	0.122222	0.766667
CLDN5	8.5498	0.0139134	0.141304	0.282609	0.576087	0.111111	0.122222	0.766667
CLTCL1	8.5498	0.0139134	0.141304	0.282609	0.576087	0.111111	0.122222	0.766667
COMT	8.5498	0.0139134	0.141304	0.282609	0.576087	0.111111	0.122222	0.766667
CRKL	8.5498	0.0139134	0.141304	0.282609	0.576087	0.111111	0.122222	0.766667
DGCR14	8.5498	0.0139134	0.141304	0.282609	0.576087	0.111111	0.122222	0.766667
DGCR2	8.5498	0.0139134	0.141304	0.282609	0.576087	0.111111	0.122222	0.766667
DGCR5	8.5498	0.0139134	0.141304	0.282609	0.576087	0.111111	0.122222	0.766667
DGCR6L	8.5498	0.0139134	0.141304	0.282609	0.576087	0.111111	0.122222	0.766667
DGCR6	8.5498	0.0139134	0.141304	0.282609	0.576087	0.111111	0.122222	0.766667
DGCR8	8.5498	0.0139134	0.141304	0.282609	0.576087	0.111111	0.122222	0.766667
FAM230A	8.5498	0.0139134	0.141304	0.282609	0.576087	0.111111	0.122222	0.766667
FAM230B	8.5498	0.0139134	0.141304	0.282609	0.576087	0.111111	0.122222	0.766667
FAM230C	8.5498	0.0139134	0.141304	0.282609	0.576087	0.111111	0.122222	0.766667
GGT2	8.5498	0.0139134	0.141304	0.282609	0.576087	0.111111	0.122222	0.766667
GGT3P	8.5498	0.0139134	0.141304	0.282609	0.576087	0.111111	0.122222	0.766667
GGTLC3	8.5498	0.0139134	0.141304	0.282609	0.576087	0.111111	0.122222	0.766667
GNB1L	8.5498	0.0139134	0.141304	0.282609	0.576087	0.111111	0.122222	0.766667
GP1BB	8.5498	0.0139134	0.141304	0.282609	0.576087	0.111111	0.122222	0.766667
GSC2	8.5498	0.0139134	0.141304	0.282609	0.576087	0.111111	0.122222	0.766667
HIC2	8.5498	0.0139134	0.141304	0.282609	0.576087	0.111111	0.122222	0.766667
HIRA	8.5498	0.0139134	0.141304	0.282609	0.576087	0.111111	0.122222	0.766667
KLHL22	8.5498	0.0139134	0.141304	0.282609	0.576087	0.111111	0.122222	0.766667
LZTR1	8.5498	0.0139134	0.141304	0.282609	0.576087	0.111111	0.122222	0.766667
MED15	8.5498	0.0139134	0.141304	0.282609	0.576087	0.111111	0.122222	0.766667
MIR1286	8.5498	0.0139134	0.141304	0.282609	0.576087	0.111111	0.122222	0.766667
MIR1306	8.5498	0.0139134	0.141304	0.282609	0.576087	0.111111	0.122222	0.766667
MIR130B	8.5498	0.0139134	0.141304	0.282609	0.576087	0.111111	0.122222	0.766667
MIR185	8.5498	0.0139134	0.141304	0.282609	0.576087	0.111111	0.122222	0.766667
MIR301B	8.5498	0.0139134	0.141304	0.282609	0.576087	0.111111	0.122222	0.766667
MIR3618	8.5498	0.0139134	0.141304	0.282609	0.576087	0.111111	0.122222	0.766667
MIR4761	8.5498	0.0139134	0.141304	0.282609	0.576087	0.111111	0.122222	0.766667
MIR649	8.5498	0.0139134	0.141304	0.282609	0.576087	0.111111	0.122222	0.766667
MRPL40	8.5498	0.0139134	0.141304	0.282609	0.576087	0.111111	0.122222	0.766667
P2RX6P	8.5498	0.0139134	0.141304	0.282609	0.576087	0.111111	0.122222	0.766667
P2RX6	8.5498	0.0139134	0.141304	0.282609	0.576087	0.111111	0.122222	0.766667
PI4KAP1	8.5498	0.0139134	0.141304	0.282609	0.576087	0.111111	0.122222	0.766667
PI4KAP2	8.5498	0.0139134	0.141304	0.282609	0.576087	0.111111	0.122222	0.766667
PI4KA	8.5498	0.0139134	0.141304	0.282609	0.576087	0.111111	0.122222	0.766667
POM121L4P	8.5498	0.0139134	0.141304	0.282609	0.576087	0.111111	0.122222	0.766667
POM121L7	8.5498	0.0139134	0.141304	0.282609	0.576087	0.111111	0.122222	0.766667
PPIL2	8.5498	0.0139134	0.141304	0.282609	0.576087	0.111111	0.122222	0.766667
PRODH	8.5498	0.0139134	0.141304	0.282609	0.576087	0.111111	0.122222	0.766667
RANBP1	8.5498	0.0139134	0.141304	0.282609	0.576087	0.111111	0.122222	0.766667
RIMBP3B	8.5498	0.0139134	0.141304	0.282609	0.576087	0.111111	0.122222	0.766667
RIMBP3C	8.5498	0.0139134	0.141304	0.282609	0.576087	0.111111	0.122222	0.766667
RIMBP3	8.5498	0.0139134	0.141304	0.282609	0.576087	0.111111	0.122222	0.766667
RN7SKP131	8.5498	0.0139134	0.141304	0.282609	0.576087	0.111111	0.122222	0.766667
RN7SKP221	8.5498	0.0139134	0.141304	0.282609	0.576087	0.111111	0.122222	0.766667
RN7SKP63	8.5498	0.0139134	0.141304	0.282609	0.576087	0.111111	0.122222	0.766667
RN7SL168P	8.5498	0.0139134	0.141304	0.282609	0.576087	0.111111	0.122222	0.766667
RN7SL280P	8.5498	0.0139134	0.141304	0.282609	0.576087	0.111111	0.122222	0.766667
RN7SL389P	8.5498	0.0139134	0.141304	0.282609	0.576087	0.111111	0.122222	0.766667
RN7SL812P	8.5498	0.0139134	0.141304	0.282609	0.576087	0.111111	0.122222	0.766667
RTN4R	8.5498	0.0139134	0.141304	0.282609	0.576087	0.111111	0.122222	0.766667
SCARF2	8.5498	0.0139134	0.141304	0.282609	0.576087	0.111111	0.122222	0.766667
SCARNA17.ENSG00000252020.1	8.5498	0.0139134	0.141304	0.282609	0.576087	0.111111	0.122222	0.766667
SCARNA17.ENSG00000252143.1	8.5498	0.0139134	0.141304	0.282609	0.576087	0.111111	0.122222	0.766667
SCARNA17.ENSG00000252571.1	8.5498	0.0139134	0.141304	0.282609	0.576087	0.111111	0.122222	0.766667
SCARNA18.ENSG00000252024.1	8.5498	0.0139134	0.141304	0.282609	0.576087	0.111111	0.122222	0.766667
SCARNA18.ENSG00000252314.1	8.5498	0.0139134	0.141304	0.282609	0.576087	0.111111	0.122222	0.766667
SCARNA18.ENSG00000252605.1	8.5498	0.0139134	0.141304	0.282609	0.576087	0.111111	0.122222	0.766667
SDF2L1	8.5498	0.0139134	0.141304	0.282609	0.576087	0.111111	0.122222	0.766667
X5.Sep	8.5498	0.0139134	0.141304	0.282609	0.576087	0.111111	0.122222	0.766667
SERPIND1	8.5498	0.0139134	0.141304	0.282609	0.576087	0.111111	0.122222	0.766667
SLC25A1	8.5498	0.0139134	0.141304	0.282609	0.576087	0.111111	0.122222	0.766667
SLC7A4	8.5498	0.0139134	0.141304	0.282609	0.576087	0.111111	0.122222	0.766667
SMPD4P1	8.5498	0.0139134	0.141304	0.282609	0.576087	0.111111	0.122222	0.766667
SNAP29	8.5498	0.0139134	0.141304	0.282609	0.576087	0.111111	0.122222	0.766667
SNORA15.ENSG00000251940.1	8.5498	0.0139134	0.141304	0.282609	0.576087	0.111111	0.122222	0.766667
SNORA77.ENSG00000264346.1	8.5498	0.0139134	0.141304	0.282609	0.576087	0.111111	0.122222	0.766667
TANGO2	8.5498	0.0139134	0.141304	0.282609	0.576087	0.111111	0.122222	0.766667
TBX1	8.5498	0.0139134	0.141304	0.282609	0.576087	0.111111	0.122222	0.766667
THAP7	8.5498	0.0139134	0.141304	0.282609	0.576087	0.111111	0.122222	0.766667
TMEM191A	8.5498	0.0139134	0.141304	0.282609	0.576087	0.111111	0.122222	0.766667
TMEM191C	8.5498	0.0139134	0.141304	0.282609	0.576087	0.111111	0.122222	0.766667
TRMT2A	8.5498	0.0139134	0.141304	0.282609	0.576087	0.111111	0.122222	0.766667
TSSK2	8.5498	0.0139134	0.141304	0.282609	0.576087	0.111111	0.122222	0.766667
TUBA3FP	8.5498	0.0139134	0.141304	0.282609	0.576087	0.111111	0.122222	0.766667
TXNRD2	8.5498	0.0139134	0.141304	0.282609	0.576087	0.111111	0.122222	0.766667
UBE2L3	8.5498	0.0139134	0.141304	0.282609	0.576087	0.111111	0.122222	0.766667
UFD1L	8.5498	0.0139134	0.141304	0.282609	0.576087	0.111111	0.122222	0.766667
USP18	8.5498	0.0139134	0.141304	0.282609	0.576087	0.111111	0.122222	0.766667
USP41	8.5498	0.0139134	0.141304	0.282609	0.576087	0.111111	0.122222	0.766667
YDJC	8.5498	0.0139134	0.141304	0.282609	0.576087	0.111111	0.122222	0.766667
YPEL1	8.5498	0.0139134	0.141304	0.282609	0.576087	0.111111	0.122222	0.766667
ZDHHC8	8.5498	0.0139134	0.141304	0.282609	0.576087	0.111111	0.122222	0.766667
ZNF74	8.5498	0.0139134	0.141304	0.282609	0.576087	0.111111	0.122222	0.766667
snoU13.ENSG00000252402.1	8.5498	0.0139134	0.141304	0.282609	0.576087	0.111111	0.122222	0.766667
snoU13.ENSG00000252799.1	8.5498	0.0139134	0.141304	0.282609	0.576087	0.111111	0.122222	0.766667
snoU13.ENSG00000271796.1	8.5498	0.0139134	0.141304	0.282609	0.576087	0.111111	0.122222	0.766667
ALDOC	8.54444	0.0139508	0.293478	0.130435	0.576087	0.144444	0.0777778	0.777778
SPAG5	8.54444	0.0139508	0.293478	0.130435	0.576087	0.144444	0.0777778	0.777778
KIAA0100	8.54444	0.0139508	0.293478	0.130435	0.576087	0.144444	0.0777778	0.777778
SGK494	8.54444	0.0139508	0.293478	0.130435	0.576087	0.144444	0.0777778	0.777778
SDF2	8.54444	0.0139508	0.293478	0.130435	0.576087	0.144444	0.0777778	0.777778
SUPT6H	8.54444	0.0139508	0.293478	0.130435	0.576087	0.144444	0.0777778	0.777778
PROCA1	8.54444	0.0139508	0.293478	0.130435	0.576087	0.144444	0.0777778	0.777778
RAB34	8.54444	0.0139508	0.293478	0.130435	0.576087	0.144444	0.0777778	0.777778
UPB1	8.53258	0.0140338	0.152174	0.271739	0.576087	0.0888889	0.133333	0.777778
GUCD1	8.53258	0.0140338	0.152174	0.271739	0.576087	0.0888889	0.133333	0.777778
SNRPD3	8.53258	0.0140338	0.152174	0.271739	0.576087	0.0888889	0.133333	0.777778
FAM211B	8.53258	0.0140338	0.152174	0.271739	0.576087	0.0888889	0.133333	0.777778
GGT1	8.53258	0.0140338	0.152174	0.271739	0.576087	0.0888889	0.133333	0.777778
CCDC117	8.53258	0.0140338	0.152174	0.271739	0.576087	0.0888889	0.133333	0.777778
XBP1	8.53258	0.0140338	0.152174	0.271739	0.576087	0.0888889	0.133333	0.777778
EMID1	8.53258	0.0140338	0.152174	0.271739	0.576087	0.0888889	0.133333	0.777778
RHBDD3	8.53258	0.0140338	0.152174	0.271739	0.576087	0.0888889	0.133333	0.777778
RASL10A	8.53258	0.0140338	0.152174	0.271739	0.576087	0.0888889	0.133333	0.777778
AP1B1	8.53258	0.0140338	0.152174	0.271739	0.576087	0.0888889	0.133333	0.777778
SNORD125	8.53258	0.0140338	0.152174	0.271739	0.576087	0.0888889	0.133333	0.777778
RFPL1S	8.53258	0.0140338	0.152174	0.271739	0.576087	0.0888889	0.133333	0.777778
RFPL1	8.53258	0.0140338	0.152174	0.271739	0.576087	0.0888889	0.133333	0.777778
NEFH	8.53258	0.0140338	0.152174	0.271739	0.576087	0.0888889	0.133333	0.777778
THOC5	8.53258	0.0140338	0.152174	0.271739	0.576087	0.0888889	0.133333	0.777778
NIPSNAP1	8.53258	0.0140338	0.152174	0.271739	0.576087	0.0888889	0.133333	0.777778
LINC00675	8.50846	0.014204	0.0869565	0.576087	0.336957	0	0.588889	0.411111
PIRT	8.50846	0.014204	0.0869565	0.576087	0.336957	0	0.588889	0.411111
RNA5SP136	8.50779	0.0142088	0.0978261	0.25	0.652174	0.1	0.0888889	0.811111
SHQ1	8.50779	0.0142088	0.0978261	0.25	0.652174	0.1	0.0888889	0.811111
PPP4R2	8.50779	0.0142088	0.0978261	0.25	0.652174	0.1	0.0888889	0.811111
EBLN2	8.50779	0.0142088	0.0978261	0.25	0.652174	0.1	0.0888889	0.811111
snoU13.ENSG00000238416.1	8.50779	0.0142088	0.0978261	0.25	0.652174	0.1	0.0888889	0.811111
RN7SL305P	8.47493	0.0144441	0.152174	0.26087	0.586957	0.111111	0.111111	0.777778
SLC5A1	8.47493	0.0144441	0.152174	0.26087	0.586957	0.111111	0.111111	0.777778
AP1B1P1	8.47493	0.0144441	0.152174	0.26087	0.586957	0.111111	0.111111	0.777778
C22orf42	8.47493	0.0144441	0.152174	0.26087	0.586957	0.111111	0.111111	0.777778
RFPL2	8.47493	0.0144441	0.152174	0.26087	0.586957	0.111111	0.111111	0.777778
SLC5A4	8.47493	0.0144441	0.152174	0.26087	0.586957	0.111111	0.111111	0.777778
RFPL3	8.47493	0.0144441	0.152174	0.26087	0.586957	0.111111	0.111111	0.777778
RFPL3S	8.47493	0.0144441	0.152174	0.26087	0.586957	0.111111	0.111111	0.777778
RTCB	8.47493	0.0144441	0.152174	0.26087	0.586957	0.111111	0.111111	0.777778
BPIFC	8.47493	0.0144441	0.152174	0.26087	0.586957	0.111111	0.111111	0.777778
FBXO7	8.47493	0.0144441	0.152174	0.26087	0.586957	0.111111	0.111111	0.777778
RASD2	8.47493	0.0144441	0.152174	0.26087	0.586957	0.111111	0.111111	0.777778
RCE1	8.47069	0.0144748	0.076087	0.25	0.673913	0.0777778	0.0888889	0.833333
LRFN4	8.47069	0.0144748	0.076087	0.25	0.673913	0.0777778	0.0888889	0.833333
EWSR1	8.45907	0.0145591	0.163043	0.26087	0.576087	0.0888889	0.133333	0.777778
GAS2L1	8.45907	0.0145591	0.163043	0.26087	0.576087	0.0888889	0.133333	0.777778
MYO18A	8.45795	0.0145673	0.293478	0.141304	0.565217	0.144444	0.0888889	0.766667
TIAF1	8.45795	0.0145673	0.293478	0.141304	0.565217	0.144444	0.0888889	0.766667
CRYBA1	8.45795	0.0145673	0.293478	0.141304	0.565217	0.144444	0.0888889	0.766667
NUFIP2	8.45795	0.0145673	0.293478	0.141304	0.565217	0.144444	0.0888889	0.766667
MIR4523	8.45795	0.0145673	0.293478	0.141304	0.565217	0.144444	0.0888889	0.766667
TAOK1	8.45795	0.0145673	0.293478	0.141304	0.565217	0.144444	0.0888889	0.766667
RNF145	8.44757	0.0146431	0.228261	0.184783	0.586957	0.344444	0.0555556	0.6
SNORA68.ENSG00000252458.1	8.44757	0.0146431	0.228261	0.184783	0.586957	0.344444	0.0555556	0.6
UBLCP1	8.44757	0.0146431	0.228261	0.184783	0.586957	0.344444	0.0555556	0.6
FABP6	8.44757	0.0146431	0.228261	0.184783	0.586957	0.344444	0.0555556	0.6
CCNJL	8.44757	0.0146431	0.228261	0.184783	0.586957	0.344444	0.0555556	0.6
RN7SL295P	8.44757	0.0146431	0.228261	0.184783	0.586957	0.344444	0.0555556	0.6
C1QTNF2	8.44757	0.0146431	0.228261	0.184783	0.586957	0.344444	0.0555556	0.6
C5orf54	8.44757	0.0146431	0.228261	0.184783	0.586957	0.344444	0.0555556	0.6
SLU7	8.44757	0.0146431	0.228261	0.184783	0.586957	0.344444	0.0555556	0.6
PTTG1	8.44757	0.0146431	0.228261	0.184783	0.586957	0.344444	0.0555556	0.6
MIR146A	8.44757	0.0146431	0.228261	0.184783	0.586957	0.344444	0.0555556	0.6
MIR3142	8.44757	0.0146431	0.228261	0.184783	0.586957	0.344444	0.0555556	0.6
ATP10B	8.44757	0.0146431	0.228261	0.184783	0.586957	0.344444	0.0555556	0.6
GABRB2	8.44757	0.0146431	0.228261	0.184783	0.586957	0.344444	0.0555556	0.6
GABRA6	8.44757	0.0146431	0.228261	0.184783	0.586957	0.344444	0.0555556	0.6
GABRG2	8.44757	0.0146431	0.228261	0.184783	0.586957	0.344444	0.0555556	0.6
NCF4	8.42109	0.0148383	0.173913	0.23913	0.586957	0.122222	0.1	0.777778
CSF2RB	8.42109	0.0148383	0.173913	0.23913	0.586957	0.122222	0.1	0.777778
snoU13.ENSG00000239056.1	8.42109	0.0148383	0.173913	0.23913	0.586957	0.122222	0.1	0.777778
TEX33	8.42109	0.0148383	0.173913	0.23913	0.586957	0.122222	0.1	0.777778
USP32P3	8.40962	0.0149236	0.184783	0.358696	0.456522	0.0555556	0.333333	0.611111
MIR3912	8.40233	0.0149781	0.25	0.195652	0.554348	0.333333	0.0555556	0.611111
NPM1	8.40233	0.0149781	0.25	0.195652	0.554348	0.333333	0.0555556	0.611111
FGF18	8.40233	0.0149781	0.25	0.195652	0.554348	0.333333	0.0555556	0.611111
EFCAB9	8.40233	0.0149781	0.25	0.195652	0.554348	0.333333	0.0555556	0.611111
STK10	8.40233	0.0149781	0.25	0.195652	0.554348	0.333333	0.0555556	0.611111
UBTD2	8.40233	0.0149781	0.25	0.195652	0.554348	0.333333	0.0555556	0.611111
SNORA57.ENSG00000212529.1	8.40233	0.0149781	0.25	0.195652	0.554348	0.333333	0.0555556	0.611111
HSPA9	8.40126	0.0149861	0.25	0.173913	0.576087	0.344444	0.0444444	0.611111
RNY4P8	8.39456	0.0150364	0.293478	0.152174	0.554348	0.144444	0.1	0.755556
CDC6	8.39456	0.0150364	0.293478	0.152174	0.554348	0.144444	0.1	0.755556
PRKCA	8.39283	0.0150494	0.402174	0.108696	0.48913	0.233333	0.0666667	0.7
RCN1	8.38269	0.015126	0.0869565	0.23913	0.673913	0.0444444	0.1	0.855556
DEPDC7	8.38269	0.015126	0.0869565	0.23913	0.673913	0.0444444	0.1	0.855556
CD44	8.38269	0.015126	0.0869565	0.23913	0.673913	0.0444444	0.1	0.855556
SLC1A2	8.38269	0.015126	0.0869565	0.23913	0.673913	0.0444444	0.1	0.855556
GXYLT2	8.38064	0.0151414	0.0978261	0.25	0.652174	0.111111	0.0888889	0.8
HSD17B12	8.37047	0.0152187	0.0869565	0.23913	0.673913	0.0333333	0.111111	0.855556
ALKBH3	8.37047	0.0152187	0.0869565	0.23913	0.673913	0.0333333	0.111111	0.855556
C11orf96	8.37047	0.0152187	0.0869565	0.23913	0.673913	0.0333333	0.111111	0.855556
TBC1D16	8.36153	0.0152868	0.423913	0.108696	0.467391	0.244444	0.0777778	0.677778
CCDC40	8.36153	0.0152868	0.423913	0.108696	0.467391	0.244444	0.0777778	0.677778
GAA	8.36153	0.0152868	0.423913	0.108696	0.467391	0.244444	0.0777778	0.677778
EIF4A3	8.36153	0.0152868	0.423913	0.108696	0.467391	0.244444	0.0777778	0.677778
CARD14	8.36153	0.0152868	0.423913	0.108696	0.467391	0.244444	0.0777778	0.677778
SGSH	8.36153	0.0152868	0.423913	0.108696	0.467391	0.244444	0.0777778	0.677778
SLC26A11	8.36153	0.0152868	0.423913	0.108696	0.467391	0.244444	0.0777778	0.677778
RNF213	8.36153	0.0152868	0.423913	0.108696	0.467391	0.244444	0.0777778	0.677778
ENDOV	8.36153	0.0152868	0.423913	0.108696	0.467391	0.244444	0.0777778	0.677778
MIR4730	8.36153	0.0152868	0.423913	0.108696	0.467391	0.244444	0.0777778	0.677778
NPTX1	8.36153	0.0152868	0.423913	0.108696	0.467391	0.244444	0.0777778	0.677778
RPTOR	8.36153	0.0152868	0.423913	0.108696	0.467391	0.244444	0.0777778	0.677778
CHMP6	8.36153	0.0152868	0.423913	0.108696	0.467391	0.244444	0.0777778	0.677778
BAIAP2	8.36153	0.0152868	0.423913	0.108696	0.467391	0.244444	0.0777778	0.677778
MIR1250	8.36153	0.0152868	0.423913	0.108696	0.467391	0.244444	0.0777778	0.677778
MIR338	8.36153	0.0152868	0.423913	0.108696	0.467391	0.244444	0.0777778	0.677778
MIR657	8.36153	0.0152868	0.423913	0.108696	0.467391	0.244444	0.0777778	0.677778
ALYREF	8.36153	0.0152868	0.423913	0.108696	0.467391	0.244444	0.0777778	0.677778
ANAPC11	8.36153	0.0152868	0.423913	0.108696	0.467391	0.244444	0.0777778	0.677778
NPB	8.36153	0.0152868	0.423913	0.108696	0.467391	0.244444	0.0777778	0.677778
PCYT2	8.36153	0.0152868	0.423913	0.108696	0.467391	0.244444	0.0777778	0.677778
SIRT7	8.36153	0.0152868	0.423913	0.108696	0.467391	0.244444	0.0777778	0.677778
MAFG	8.36153	0.0152868	0.423913	0.108696	0.467391	0.244444	0.0777778	0.677778
MYADML2	8.36153	0.0152868	0.423913	0.108696	0.467391	0.244444	0.0777778	0.677778
PYCR1	8.36153	0.0152868	0.423913	0.108696	0.467391	0.244444	0.0777778	0.677778
NOTUM	8.36153	0.0152868	0.423913	0.108696	0.467391	0.244444	0.0777778	0.677778
ASPSCR1	8.36153	0.0152868	0.423913	0.108696	0.467391	0.244444	0.0777778	0.677778
SNORA59B	8.35396	0.0153448	0.206522	0.369565	0.423913	0.0666667	0.366667	0.566667
RN7SL162P	8.33716	0.0154743	0.152174	0.282609	0.565217	0.0888889	0.144444	0.766667
LINC00482	8.31978	0.0156093	0.402174	0.119565	0.478261	0.244444	0.0666667	0.688889
TMEM105	8.31978	0.0156093	0.402174	0.119565	0.478261	0.244444	0.0666667	0.688889
PDE6G	8.31978	0.0156093	0.402174	0.119565	0.478261	0.244444	0.0666667	0.688889
OXLD1	8.31978	0.0156093	0.402174	0.119565	0.478261	0.244444	0.0666667	0.688889
CCDC137	8.31978	0.0156093	0.402174	0.119565	0.478261	0.244444	0.0666667	0.688889
ARL16	8.31978	0.0156093	0.402174	0.119565	0.478261	0.244444	0.0666667	0.688889
HGS	8.31978	0.0156093	0.402174	0.119565	0.478261	0.244444	0.0666667	0.688889
MRPL12	8.31978	0.0156093	0.402174	0.119565	0.478261	0.244444	0.0666667	0.688889
SLC25A10	8.31978	0.0156093	0.402174	0.119565	0.478261	0.244444	0.0666667	0.688889
ALDH3A2	8.31963	0.0156105	0.206522	0.358696	0.434783	0.0666667	0.355556	0.577778
SNORA31.ENSG00000252349.1	8.31963	0.0156105	0.206522	0.358696	0.434783	0.0666667	0.355556	0.577778
RAG1	8.31894	0.0156158	0.076087	0.25	0.673913	0.0333333	0.111111	0.855556
KPNB1	8.29648	0.0157922	0.326087	0.119565	0.554348	0.166667	0.0777778	0.755556
DHRS13	8.2894	0.0158482	0.293478	0.141304	0.565217	0.155556	0.0777778	0.766667
PHF12	8.2894	0.0158482	0.293478	0.141304	0.565217	0.155556	0.0777778	0.766667
P2RX7	8.28351	0.015895	0.228261	0.108696	0.663043	0.0777778	0.1	0.822222
P2RX4	8.28351	0.015895	0.228261	0.108696	0.663043	0.0777778	0.1	0.822222
IKZF3	8.27774	0.0159408	0.293478	0.152174	0.554348	0.133333	0.122222	0.744444
ZPBP2	8.27774	0.0159408	0.293478	0.152174	0.554348	0.133333	0.122222	0.744444
PPM1F	8.27518	0.0159612	0.130435	0.293478	0.576087	0.1	0.133333	0.766667
BCR	8.27518	0.0159612	0.130435	0.293478	0.576087	0.1	0.133333	0.766667
CES5AP1	8.27518	0.0159612	0.130435	0.293478	0.576087	0.1	0.133333	0.766667
GGTLC2	8.27518	0.0159612	0.130435	0.293478	0.576087	0.1	0.133333	0.766667
GNAZ	8.27518	0.0159612	0.130435	0.293478	0.576087	0.1	0.133333	0.766667
IGLC1	8.27518	0.0159612	0.130435	0.293478	0.576087	0.1	0.133333	0.766667
IGLC2	8.27518	0.0159612	0.130435	0.293478	0.576087	0.1	0.133333	0.766667
IGLC3	8.27518	0.0159612	0.130435	0.293478	0.576087	0.1	0.133333	0.766667
IGLC7	8.27518	0.0159612	0.130435	0.293478	0.576087	0.1	0.133333	0.766667
IGLJ1	8.27518	0.0159612	0.130435	0.293478	0.576087	0.1	0.133333	0.766667
IGLJ2	8.27518	0.0159612	0.130435	0.293478	0.576087	0.1	0.133333	0.766667
IGLJ3	8.27518	0.0159612	0.130435	0.293478	0.576087	0.1	0.133333	0.766667
IGLJ4	8.27518	0.0159612	0.130435	0.293478	0.576087	0.1	0.133333	0.766667
IGLJ5	8.27518	0.0159612	0.130435	0.293478	0.576087	0.1	0.133333	0.766667
IGLJ6	8.27518	0.0159612	0.130435	0.293478	0.576087	0.1	0.133333	0.766667
IGLJ7	8.27518	0.0159612	0.130435	0.293478	0.576087	0.1	0.133333	0.766667
IGLL5	8.27518	0.0159612	0.130435	0.293478	0.576087	0.1	0.133333	0.766667
MIR650	8.27518	0.0159612	0.130435	0.293478	0.576087	0.1	0.133333	0.766667
POM121L1P	8.27518	0.0159612	0.130435	0.293478	0.576087	0.1	0.133333	0.766667
PRAMEF24P	8.27518	0.0159612	0.130435	0.293478	0.576087	0.1	0.133333	0.766667
PRAME	8.27518	0.0159612	0.130435	0.293478	0.576087	0.1	0.133333	0.766667
RAB36	8.27518	0.0159612	0.130435	0.293478	0.576087	0.1	0.133333	0.766667
RN7SL263P	8.27518	0.0159612	0.130435	0.293478	0.576087	0.1	0.133333	0.766667
RTDR1	8.27518	0.0159612	0.130435	0.293478	0.576087	0.1	0.133333	0.766667
TOP3B	8.27518	0.0159612	0.130435	0.293478	0.576087	0.1	0.133333	0.766667
VPREB1	8.27518	0.0159612	0.130435	0.293478	0.576087	0.1	0.133333	0.766667
ZDHHC8P1	8.27518	0.0159612	0.130435	0.293478	0.576087	0.1	0.133333	0.766667
ZNF280A	8.27518	0.0159612	0.130435	0.293478	0.576087	0.1	0.133333	0.766667
ZNF280B	8.27518	0.0159612	0.130435	0.293478	0.576087	0.1	0.133333	0.766667
snoU13.ENSG00000239066.1	8.27518	0.0159612	0.130435	0.293478	0.576087	0.1	0.133333	0.766667
C22orf43	8.27518	0.0159612	0.130435	0.293478	0.576087	0.1	0.133333	0.766667
IGLL1	8.27518	0.0159612	0.130435	0.293478	0.576087	0.1	0.133333	0.766667
RGL4	8.27518	0.0159612	0.130435	0.293478	0.576087	0.1	0.133333	0.766667
TRPM1	8.27325	0.0159767	0.152174	0.228261	0.619565	0.0666667	0.122222	0.811111
KLF13	8.27325	0.0159767	0.152174	0.228261	0.619565	0.0666667	0.122222	0.811111
GDAP1L1	8.27039	0.0159995	0.315217	0.076087	0.608696	0.266667	0	0.733333
FITM2	8.27039	0.0159995	0.315217	0.076087	0.608696	0.266667	0	0.733333
R3HDML	8.27039	0.0159995	0.315217	0.076087	0.608696	0.266667	0	0.733333
PLCG1	8.2669	0.0160275	0.326087	0.076087	0.597826	0.277778	0	0.722222
ZHX3	8.2669	0.0160275	0.326087	0.076087	0.597826	0.277778	0	0.722222
PTPRT	8.2669	0.0160275	0.326087	0.076087	0.597826	0.277778	0	0.722222
RN7SKP100	8.2669	0.0160275	0.326087	0.076087	0.597826	0.277778	0	0.722222
RN7SL666P	8.2669	0.0160275	0.326087	0.076087	0.597826	0.277778	0	0.722222
SCARNA15.ENSG00000252193.1	8.2669	0.0160275	0.326087	0.076087	0.597826	0.277778	0	0.722222
SRSF6	8.2669	0.0160275	0.326087	0.076087	0.597826	0.277778	0	0.722222
L3MBTL1	8.2669	0.0160275	0.326087	0.076087	0.597826	0.277778	0	0.722222
SGK2	8.2669	0.0160275	0.326087	0.076087	0.597826	0.277778	0	0.722222
HNF4A	8.2669	0.0160275	0.326087	0.076087	0.597826	0.277778	0	0.722222
MFNG	8.26662	0.0160297	0.163043	0.25	0.586957	0.133333	0.1	0.766667
CARD10	8.26662	0.0160297	0.163043	0.25	0.586957	0.133333	0.1	0.766667
CEBPB	8.26507	0.0160421	0.336957	0.076087	0.586957	0.288889	0	0.711111
PARD6B	8.26507	0.0160421	0.336957	0.076087	0.586957	0.288889	0	0.711111
PTPN1	8.26482	0.0160442	0.347826	0.076087	0.576087	0.3	0	0.7
OR5AK2	8.26134	0.0160721	0.0434783	0.25	0.706522	0.0111111	0.111111	0.877778
LRRC55	8.26134	0.0160721	0.0434783	0.25	0.706522	0.0111111	0.111111	0.877778
APLNR	8.26134	0.0160721	0.0434783	0.25	0.706522	0.0111111	0.111111	0.877778
TNKS1BP1	8.26134	0.0160721	0.0434783	0.25	0.706522	0.0111111	0.111111	0.877778
SSRP1	8.26134	0.0160721	0.0434783	0.25	0.706522	0.0111111	0.111111	0.877778
snoU13.ENSG00000238692.1	8.26134	0.0160721	0.0434783	0.25	0.706522	0.0111111	0.111111	0.877778
OR6Q1	8.26134	0.0160721	0.0434783	0.25	0.706522	0.0111111	0.111111	0.877778
OR5B21	8.26126	0.0160727	0.0543478	0.25	0.695652	0.0111111	0.122222	0.866667
COMMD7	8.2541	0.0161304	0.336957	0.0543478	0.608696	0.233333	0	0.766667
DNMT3B	8.2541	0.0161304	0.336957	0.0543478	0.608696	0.233333	0	0.766667
AATK	8.24996	0.0161638	0.413043	0.119565	0.467391	0.244444	0.0777778	0.677778
AZI1	8.24996	0.0161638	0.413043	0.119565	0.467391	0.244444	0.0777778	0.677778
ENTHD2	8.24996	0.0161638	0.413043	0.119565	0.467391	0.244444	0.0777778	0.677778
C17orf89	8.24996	0.0161638	0.413043	0.119565	0.467391	0.244444	0.0777778	0.677778
SLC38A10	8.24996	0.0161638	0.413043	0.119565	0.467391	0.244444	0.0777778	0.677778
FAM195B	8.24996	0.0161638	0.413043	0.119565	0.467391	0.244444	0.0777778	0.677778
P4HB	8.24996	0.0161638	0.413043	0.119565	0.467391	0.244444	0.0777778	0.677778
PPP1R27	8.24996	0.0161638	0.413043	0.119565	0.467391	0.244444	0.0777778	0.677778
ARHGDIA	8.24996	0.0161638	0.413043	0.119565	0.467391	0.244444	0.0777778	0.677778
STRA13	8.24996	0.0161638	0.413043	0.119565	0.467391	0.244444	0.0777778	0.677778
DCXR	8.24996	0.0161638	0.413043	0.119565	0.467391	0.244444	0.0777778	0.677778
LRRC45	8.24996	0.0161638	0.413043	0.119565	0.467391	0.244444	0.0777778	0.677778
RAC3	8.24996	0.0161638	0.413043	0.119565	0.467391	0.244444	0.0777778	0.677778
RFNG	8.24996	0.0161638	0.413043	0.119565	0.467391	0.244444	0.0777778	0.677778
GPS1	8.24996	0.0161638	0.413043	0.119565	0.467391	0.244444	0.0777778	0.677778
DUS1L	8.24996	0.0161638	0.413043	0.119565	0.467391	0.244444	0.0777778	0.677778
CAT	8.24568	0.0161984	0.076087	0.23913	0.684783	0.0555556	0.0888889	0.855556
SH3PXD2B	8.2316	0.0163129	0.26087	0.195652	0.543478	0.333333	0.0555556	0.611111
LIF	8.21525	0.0164468	0.141304	0.271739	0.586957	0.1	0.122222	0.777778
MGC20647	8.21525	0.0164468	0.141304	0.271739	0.586957	0.1	0.122222	0.777778
OSM	8.21525	0.0164468	0.141304	0.271739	0.586957	0.1	0.122222	0.777778
GATSL3	8.21525	0.0164468	0.141304	0.271739	0.586957	0.1	0.122222	0.777778
TBC1D10A	8.21525	0.0164468	0.141304	0.271739	0.586957	0.1	0.122222	0.777778
SF3A1	8.21525	0.0164468	0.141304	0.271739	0.586957	0.1	0.122222	0.777778
CCDC157	8.21525	0.0164468	0.141304	0.271739	0.586957	0.1	0.122222	0.777778
RNF215	8.21525	0.0164468	0.141304	0.271739	0.586957	0.1	0.122222	0.777778
SEC14L2	8.21525	0.0164468	0.141304	0.271739	0.586957	0.1	0.122222	0.777778
KIAA1658	8.21525	0.0164468	0.141304	0.271739	0.586957	0.1	0.122222	0.777778
MTFP1	8.21525	0.0164468	0.141304	0.271739	0.586957	0.1	0.122222	0.777778
SEC14L3	8.21525	0.0164468	0.141304	0.271739	0.586957	0.1	0.122222	0.777778
SEC14L4	8.21525	0.0164468	0.141304	0.271739	0.586957	0.1	0.122222	0.777778
TCN2	8.21525	0.0164468	0.141304	0.271739	0.586957	0.1	0.122222	0.777778
SLC35E4	8.21525	0.0164468	0.141304	0.271739	0.586957	0.1	0.122222	0.777778
DUSP18	8.21525	0.0164468	0.141304	0.271739	0.586957	0.1	0.122222	0.777778
OSBP2	8.21525	0.0164468	0.141304	0.271739	0.586957	0.1	0.122222	0.777778
MIR3200	8.21525	0.0164468	0.141304	0.271739	0.586957	0.1	0.122222	0.777778
MORC2	8.21525	0.0164468	0.141304	0.271739	0.586957	0.1	0.122222	0.777778
TUG1	8.21525	0.0164468	0.141304	0.271739	0.586957	0.1	0.122222	0.777778
MIR331	8.20352	0.0165435	0.23913	0.0978261	0.663043	0.0888889	0.0777778	0.833333
MIR3685	8.20352	0.0165435	0.23913	0.0978261	0.663043	0.0888889	0.0777778	0.833333
NEDD1	8.20352	0.0165435	0.23913	0.0978261	0.663043	0.0888889	0.0777778	0.833333
WIPF2	8.20272	0.0165501	0.304348	0.152174	0.543478	0.155556	0.1	0.744444
MEOX1	8.20272	0.0165501	0.304348	0.152174	0.543478	0.155556	0.1	0.744444
PC	8.19725	0.0165954	0.108696	0.23913	0.652174	0.0888889	0.0888889	0.822222
ANKS1B	8.19725	0.0165954	0.23913	0.108696	0.652174	0.0888889	0.0888889	0.822222
PEX26	8.18848	0.0166684	0.152174	0.271739	0.576087	0.111111	0.122222	0.766667
TUBA8	8.18848	0.0166684	0.152174	0.271739	0.576087	0.111111	0.122222	0.766667
HERC2	8.18354	0.0167097	0.130435	0.25	0.619565	0.0666667	0.122222	0.811111
APBA2	8.18354	0.0167097	0.130435	0.25	0.619565	0.0666667	0.122222	0.811111
ARHGAP11B	8.18354	0.0167097	0.130435	0.25	0.619565	0.0666667	0.122222	0.811111
CHRFAM7A	8.18354	0.0167097	0.130435	0.25	0.619565	0.0666667	0.122222	0.811111
FAM189A1	8.18354	0.0167097	0.130435	0.25	0.619565	0.0666667	0.122222	0.811111
GOLGA6L7P	8.18354	0.0167097	0.130435	0.25	0.619565	0.0666667	0.122222	0.811111
GOLGA8F	8.18354	0.0167097	0.130435	0.25	0.619565	0.0666667	0.122222	0.811111
GOLGA8G	8.18354	0.0167097	0.130435	0.25	0.619565	0.0666667	0.122222	0.811111
GOLGA8H	8.18354	0.0167097	0.130435	0.25	0.619565	0.0666667	0.122222	0.811111
GOLGA8J	8.18354	0.0167097	0.130435	0.25	0.619565	0.0666667	0.122222	0.811111
GOLGA8M	8.18354	0.0167097	0.130435	0.25	0.619565	0.0666667	0.122222	0.811111
GOLGA8Q	8.18354	0.0167097	0.130435	0.25	0.619565	0.0666667	0.122222	0.811111
GOLGA8R	8.18354	0.0167097	0.130435	0.25	0.619565	0.0666667	0.122222	0.811111
GOLGA8T	8.18354	0.0167097	0.130435	0.25	0.619565	0.0666667	0.122222	0.811111
HERC2P9	8.18354	0.0167097	0.130435	0.25	0.619565	0.0666667	0.122222	0.811111
NDNL2	8.18354	0.0167097	0.130435	0.25	0.619565	0.0666667	0.122222	0.811111
RN7SL196P	8.18354	0.0167097	0.130435	0.25	0.619565	0.0666667	0.122222	0.811111
RN7SL238P	8.18354	0.0167097	0.130435	0.25	0.619565	0.0666667	0.122222	0.811111
RN7SL469P	8.18354	0.0167097	0.130435	0.25	0.619565	0.0666667	0.122222	0.811111
RN7SL628P	8.18354	0.0167097	0.130435	0.25	0.619565	0.0666667	0.122222	0.811111
RN7SL673P	8.18354	0.0167097	0.130435	0.25	0.619565	0.0666667	0.122222	0.811111
RN7SL719P	8.18354	0.0167097	0.130435	0.25	0.619565	0.0666667	0.122222	0.811111
RN7SL796P	8.18354	0.0167097	0.130435	0.25	0.619565	0.0666667	0.122222	0.811111
RN7SL829P	8.18354	0.0167097	0.130435	0.25	0.619565	0.0666667	0.122222	0.811111
RN7SL82P	8.18354	0.0167097	0.130435	0.25	0.619565	0.0666667	0.122222	0.811111
TJP1	8.18354	0.0167097	0.130435	0.25	0.619565	0.0666667	0.122222	0.811111
U8.ENSG00000207430.1	8.18354	0.0167097	0.130435	0.25	0.619565	0.0666667	0.122222	0.811111
U8.ENSG00000207432.1	8.18354	0.0167097	0.130435	0.25	0.619565	0.0666667	0.122222	0.811111
U8.ENSG00000238519.1	8.18354	0.0167097	0.130435	0.25	0.619565	0.0666667	0.122222	0.811111
U8.ENSG00000252602.1	8.18354	0.0167097	0.130435	0.25	0.619565	0.0666667	0.122222	0.811111
ULK4P2	8.18354	0.0167097	0.130435	0.25	0.619565	0.0666667	0.122222	0.811111
ULK4P3	8.18354	0.0167097	0.130435	0.25	0.619565	0.0666667	0.122222	0.811111
WHAMMP2	8.18354	0.0167097	0.130435	0.25	0.619565	0.0666667	0.122222	0.811111
snoZ278	8.18354	0.0167097	0.130435	0.25	0.619565	0.0666667	0.122222	0.811111
PTRF	8.16589	0.0168577	0.293478	0.152174	0.554348	0.155556	0.0888889	0.755556
ATP6V0A1	8.16589	0.0168577	0.293478	0.152174	0.554348	0.155556	0.0888889	0.755556
MIR548AT	8.16589	0.0168577	0.293478	0.152174	0.554348	0.155556	0.0888889	0.755556
MIR5010	8.16589	0.0168577	0.293478	0.152174	0.554348	0.155556	0.0888889	0.755556
MCM5	8.16474	0.0168675	0.163043	0.25	0.586957	0.111111	0.111111	0.777778
CCDC57	8.15979	0.0169092	0.413043	0.130435	0.456522	0.255556	0.0777778	0.666667
CSNK1D	8.15979	0.0169092	0.413043	0.130435	0.456522	0.255556	0.0777778	0.666667
SLC16A3	8.15979	0.0169092	0.413043	0.130435	0.456522	0.255556	0.0777778	0.666667
snoU13.ENSG00000238947.1	8.15979	0.0169092	0.413043	0.130435	0.456522	0.255556	0.0777778	0.666667
NARF	8.15979	0.0169092	0.413043	0.130435	0.456522	0.255556	0.0777778	0.666667
DESI1	8.15043	0.0169885	0.195652	0.25	0.554348	0.111111	0.133333	0.755556
XRCC6	8.15043	0.0169885	0.195652	0.25	0.554348	0.111111	0.133333	0.755556
NHP2L1	8.15043	0.0169885	0.195652	0.25	0.554348	0.111111	0.133333	0.755556
C22orf46	8.15043	0.0169885	0.195652	0.25	0.554348	0.111111	0.133333	0.755556
MEI1	8.15043	0.0169885	0.195652	0.25	0.554348	0.111111	0.133333	0.755556
RNU6ATAC22P	8.15043	0.0169885	0.195652	0.25	0.554348	0.111111	0.133333	0.755556
TEF	8.14186	0.0170615	0.206522	0.23913	0.554348	0.111111	0.133333	0.755556
TOB2	8.14186	0.0170615	0.206522	0.23913	0.554348	0.111111	0.133333	0.755556
WDR66	8.12952	0.0171671	0.217391	0.130435	0.652174	0.0777778	0.1	0.822222
GAB2	8.12675	0.0171909	0.0652174	0.282609	0.652174	0.0444444	0.122222	0.833333
SYN3	8.1245	0.0172102	0.173913	0.25	0.576087	0.122222	0.111111	0.766667
MYOT	8.12187	0.0172329	0.228261	0.184783	0.586957	0.333333	0.0555556	0.611111
PKD2L2	8.12187	0.0172329	0.228261	0.184783	0.586957	0.333333	0.0555556	0.611111
FAM13B	8.12187	0.0172329	0.228261	0.184783	0.586957	0.333333	0.0555556	0.611111
WNT8A	8.12187	0.0172329	0.228261	0.184783	0.586957	0.333333	0.0555556	0.611111
NME5	8.12187	0.0172329	0.228261	0.184783	0.586957	0.333333	0.0555556	0.611111
snoU13.ENSG00000238605.1	8.12187	0.0172329	0.228261	0.184783	0.586957	0.333333	0.0555556	0.611111
BRD8	8.12187	0.0172329	0.228261	0.184783	0.586957	0.333333	0.0555556	0.611111
KIF20A	8.12187	0.0172329	0.228261	0.184783	0.586957	0.333333	0.0555556	0.611111
CDC23	8.12187	0.0172329	0.228261	0.184783	0.586957	0.333333	0.0555556	0.611111
GFRA3	8.12187	0.0172329	0.228261	0.184783	0.586957	0.333333	0.0555556	0.611111
RN7SL682P	8.12187	0.0172329	0.228261	0.184783	0.586957	0.333333	0.0555556	0.611111
CDC25C	8.12187	0.0172329	0.228261	0.184783	0.586957	0.333333	0.0555556	0.611111
FAM53C	8.12187	0.0172329	0.228261	0.184783	0.586957	0.333333	0.0555556	0.611111
KDM3B	8.12187	0.0172329	0.228261	0.184783	0.586957	0.333333	0.0555556	0.611111
REEP2	8.12187	0.0172329	0.228261	0.184783	0.586957	0.333333	0.0555556	0.611111
PURA	8.12187	0.0172329	0.228261	0.184783	0.586957	0.333333	0.0555556	0.611111
IGIP	8.12187	0.0172329	0.228261	0.184783	0.586957	0.333333	0.0555556	0.611111
CYSTM1	8.12187	0.0172329	0.228261	0.184783	0.586957	0.333333	0.0555556	0.611111
CLINT1	8.12187	0.0172329	0.228261	0.184783	0.586957	0.333333	0.0555556	0.611111
IL12B	8.12187	0.0172329	0.228261	0.184783	0.586957	0.333333	0.0555556	0.611111
RNU4ATAC2P	8.12187	0.0172329	0.228261	0.184783	0.586957	0.333333	0.0555556	0.611111
ADRA1B	8.12187	0.0172329	0.228261	0.184783	0.586957	0.333333	0.0555556	0.611111
TTC1	8.12187	0.0172329	0.228261	0.184783	0.586957	0.333333	0.0555556	0.611111
PWWP2A	8.12187	0.0172329	0.228261	0.184783	0.586957	0.333333	0.0555556	0.611111
PKDREJ	8.11109	0.017326	0.184783	0.282609	0.532609	0.122222	0.144444	0.733333
SLC47A1	8.09855	0.017435	0.206522	0.369565	0.423913	0.0666667	0.377778	0.555556
OR4C13	8.09432	0.0174719	0.0869565	0.206522	0.706522	0.0333333	0.0888889	0.877778
OR4C12	8.09432	0.0174719	0.0869565	0.206522	0.706522	0.0333333	0.0888889	0.877778
C11orf58	8.07588	0.0176338	0.0869565	0.25	0.663043	0.0444444	0.111111	0.844444
RN7SKP90	8.07588	0.0176338	0.0869565	0.25	0.663043	0.0444444	0.111111	0.844444
KIF18A	8.07588	0.0176338	0.0869565	0.25	0.663043	0.0444444	0.111111	0.844444
MIR610	8.07588	0.0176338	0.0869565	0.25	0.663043	0.0444444	0.111111	0.844444
DCDC1	8.07588	0.0176338	0.0869565	0.25	0.663043	0.0444444	0.111111	0.844444
MIR5692C1	8.06233	0.0177536	0.206522	0.195652	0.597826	0.322222	0.0666667	0.611111
SLC25A48	8.06233	0.0177536	0.206522	0.195652	0.597826	0.322222	0.0666667	0.611111
IL9	8.06233	0.0177536	0.206522	0.195652	0.597826	0.322222	0.0666667	0.611111
LECT2	8.06233	0.0177536	0.206522	0.195652	0.597826	0.322222	0.0666667	0.611111
FBXL21	8.06233	0.0177536	0.206522	0.195652	0.597826	0.322222	0.0666667	0.611111
TGFBI	8.06233	0.0177536	0.206522	0.195652	0.597826	0.322222	0.0666667	0.611111
SMAD5	8.06233	0.0177536	0.206522	0.195652	0.597826	0.322222	0.0666667	0.611111
TEAD1	8.04441	0.0179135	0.0978261	0.23913	0.663043	0.0444444	0.111111	0.844444
LINC00958	8.04441	0.0179135	0.0978261	0.23913	0.663043	0.0444444	0.111111	0.844444
MIR4694	8.04441	0.0179135	0.0978261	0.23913	0.663043	0.0444444	0.111111	0.844444
DBX1	8.04441	0.0179135	0.0978261	0.23913	0.663043	0.0444444	0.111111	0.844444
HTATIP2	8.04441	0.0179135	0.0978261	0.23913	0.663043	0.0444444	0.111111	0.844444
PRMT3	8.04441	0.0179135	0.0978261	0.23913	0.663043	0.0444444	0.111111	0.844444
SLC6A5	8.04441	0.0179135	0.0978261	0.23913	0.663043	0.0444444	0.111111	0.844444
LUZP2	8.04441	0.0179135	0.0978261	0.23913	0.663043	0.0444444	0.111111	0.844444
SLC47A2	8.04007	0.0179524	0.206522	0.347826	0.445652	0.0666667	0.355556	0.577778
ALDH3A1	8.04007	0.0179524	0.206522	0.347826	0.445652	0.0666667	0.355556	0.577778
KYNU	8.03978	0.017955	0.206522	0.0978261	0.695652	0.0888889	0.211111	0.7
CNTNAP1	8.01567	0.0181727	0.304348	0.152174	0.543478	0.166667	0.0888889	0.744444
EZH1	8.01567	0.0181727	0.304348	0.152174	0.543478	0.166667	0.0888889	0.744444
RAMP2	8.01567	0.0181727	0.304348	0.152174	0.543478	0.166667	0.0888889	0.744444
VPS25	8.01567	0.0181727	0.304348	0.152174	0.543478	0.166667	0.0888889	0.744444
WNK4	8.01567	0.0181727	0.304348	0.152174	0.543478	0.166667	0.0888889	0.744444
CNTD1	8.01567	0.0181727	0.304348	0.152174	0.543478	0.166667	0.0888889	0.744444
COA3	8.01567	0.0181727	0.304348	0.152174	0.543478	0.166667	0.0888889	0.744444
SOST	8.01567	0.0181727	0.304348	0.152174	0.543478	0.166667	0.0888889	0.744444
DUSP3	8.01567	0.0181727	0.304348	0.152174	0.543478	0.166667	0.0888889	0.744444
C17orf105	8.01567	0.0181727	0.304348	0.152174	0.543478	0.166667	0.0888889	0.744444
MPP3	8.01567	0.0181727	0.304348	0.152174	0.543478	0.166667	0.0888889	0.744444
CD300LG	8.01567	0.0181727	0.304348	0.152174	0.543478	0.166667	0.0888889	0.744444
MPP2	8.01567	0.0181727	0.304348	0.152174	0.543478	0.166667	0.0888889	0.744444
FAM215A	8.01567	0.0181727	0.304348	0.152174	0.543478	0.166667	0.0888889	0.744444
PPY	8.01567	0.0181727	0.304348	0.152174	0.543478	0.166667	0.0888889	0.744444
PYY	8.01567	0.0181727	0.304348	0.152174	0.543478	0.166667	0.0888889	0.744444
NAGS	8.01567	0.0181727	0.304348	0.152174	0.543478	0.166667	0.0888889	0.744444
TMEM101	8.01567	0.0181727	0.304348	0.152174	0.543478	0.166667	0.0888889	0.744444
U3.ENSG00000221044.1	8.01567	0.0181727	0.304348	0.152174	0.543478	0.166667	0.0888889	0.744444
LSM12	8.01567	0.0181727	0.304348	0.152174	0.543478	0.166667	0.0888889	0.744444
G6PC3	8.01567	0.0181727	0.304348	0.152174	0.543478	0.166667	0.0888889	0.744444
HDAC5	8.01567	0.0181727	0.304348	0.152174	0.543478	0.166667	0.0888889	0.744444
ARFGAP3	8.01318	0.0181954	0.184783	0.271739	0.543478	0.1	0.155556	0.744444
KIAA1644	8.01318	0.0181954	0.184783	0.271739	0.543478	0.1	0.155556	0.744444
LDOC1L	8.01318	0.0181954	0.184783	0.271739	0.543478	0.1	0.155556	0.744444
LINC00207	8.01318	0.0181954	0.184783	0.271739	0.543478	0.1	0.155556	0.744444
LINC00229	8.01318	0.0181954	0.184783	0.271739	0.543478	0.1	0.155556	0.744444
RIBC2	8.01318	0.0181954	0.184783	0.271739	0.543478	0.1	0.155556	0.744444
FBLN1	8.01318	0.0181954	0.184783	0.271739	0.543478	0.1	0.155556	0.744444
BECN1	8.00808	0.0182418	0.293478	0.163043	0.543478	0.166667	0.0888889	0.744444
PSME3	8.00808	0.0182418	0.293478	0.163043	0.543478	0.166667	0.0888889	0.744444
AOC2	8.00808	0.0182418	0.293478	0.163043	0.543478	0.166667	0.0888889	0.744444
ZNF354A	8.00669	0.0182544	0.25	0.184783	0.565217	0.355556	0.0555556	0.588889
ADAMTS2	8.00669	0.0182544	0.25	0.184783	0.565217	0.355556	0.0555556	0.588889
RN7SL71P	8.00669	0.0182544	0.25	0.184783	0.565217	0.355556	0.0555556	0.588889
RNA5SP495	8.0014	0.0183028	0.130435	0.282609	0.586957	0.0888889	0.133333	0.777778
ASPHD2	8.0014	0.0183028	0.130435	0.282609	0.586957	0.0888889	0.133333	0.777778
RPLP0P2	7.99575	0.0183546	0.0434783	0.26087	0.695652	0.0444444	0.1	0.855556
DAGLA	7.99575	0.0183546	0.0434783	0.26087	0.695652	0.0444444	0.1	0.855556
FADS3	7.99575	0.0183546	0.0434783	0.26087	0.695652	0.0444444	0.1	0.855556
RAB3IL1	7.99575	0.0183546	0.0434783	0.26087	0.695652	0.0444444	0.1	0.855556
BEST1	7.99575	0.0183546	0.0434783	0.26087	0.695652	0.0444444	0.1	0.855556
FTH1	7.99575	0.0183546	0.0434783	0.26087	0.695652	0.0444444	0.1	0.855556
INCENP	7.99575	0.0183546	0.0434783	0.26087	0.695652	0.0444444	0.1	0.855556
FAM111B	7.98784	0.0184273	0.0434783	0.26087	0.695652	0.0111111	0.122222	0.866667
FAM111A	7.98784	0.0184273	0.0434783	0.26087	0.695652	0.0111111	0.122222	0.866667
DTX4	7.98784	0.0184273	0.0434783	0.26087	0.695652	0.0111111	0.122222	0.866667
MPEG1	7.98784	0.0184273	0.0434783	0.26087	0.695652	0.0111111	0.122222	0.866667
RN7SL42P	7.98784	0.0184273	0.0434783	0.26087	0.695652	0.0111111	0.122222	0.866667
RN7SL435P	7.98784	0.0184273	0.0434783	0.26087	0.695652	0.0111111	0.122222	0.866667
OR5AN1	7.98784	0.0184273	0.0434783	0.26087	0.695652	0.0111111	0.122222	0.866667
MS4A5	7.98784	0.0184273	0.0434783	0.26087	0.695652	0.0111111	0.122222	0.866667
MS4A1	7.98784	0.0184273	0.0434783	0.26087	0.695652	0.0111111	0.122222	0.866667
MS4A12	7.98784	0.0184273	0.0434783	0.26087	0.695652	0.0111111	0.122222	0.866667
MS4A13	7.98784	0.0184273	0.0434783	0.26087	0.695652	0.0111111	0.122222	0.866667
LINC00301	7.98784	0.0184273	0.0434783	0.26087	0.695652	0.0111111	0.122222	0.866667
MS4A8	7.98784	0.0184273	0.0434783	0.26087	0.695652	0.0111111	0.122222	0.866667
MS4A18	7.98784	0.0184273	0.0434783	0.26087	0.695652	0.0111111	0.122222	0.866667
MS4A15	7.98784	0.0184273	0.0434783	0.26087	0.695652	0.0111111	0.122222	0.866667
MS4A10	7.98784	0.0184273	0.0434783	0.26087	0.695652	0.0111111	0.122222	0.866667
CCDC86	7.98784	0.0184273	0.0434783	0.26087	0.695652	0.0111111	0.122222	0.866667
PTGDR2	7.98784	0.0184273	0.0434783	0.26087	0.695652	0.0111111	0.122222	0.866667
RNA5SP106	7.98012	0.0184986	0.206522	0.130435	0.663043	0.0777778	0.233333	0.688889
C20orf62	7.94537	0.0188228	0.326087	0.076087	0.597826	0.288889	0	0.711111
TTPAL	7.94537	0.0188228	0.326087	0.076087	0.597826	0.288889	0	0.711111
SERINC3	7.94537	0.0188228	0.326087	0.076087	0.597826	0.288889	0	0.711111
PKIG	7.94537	0.0188228	0.326087	0.076087	0.597826	0.288889	0	0.711111
IFT52	7.9447	0.0188291	0.315217	0.076087	0.608696	0.277778	0	0.722222
MYBL2	7.9447	0.0188291	0.315217	0.076087	0.608696	0.277778	0	0.722222
GTSF1L	7.9447	0.0188291	0.315217	0.076087	0.608696	0.277778	0	0.722222
TOX2	7.9447	0.0188291	0.315217	0.076087	0.608696	0.277778	0	0.722222
RN7SL443P	7.9447	0.0188291	0.315217	0.076087	0.608696	0.277778	0	0.722222
C22orf24	7.93295	0.01894	0.152174	0.26087	0.586957	0.122222	0.111111	0.766667
YWHAH	7.93295	0.01894	0.152174	0.26087	0.586957	0.122222	0.111111	0.766667
snoU13.ENSG00000238910.1	7.93295	0.01894	0.152174	0.26087	0.586957	0.122222	0.111111	0.766667
MIR605	7.93082	0.0189603	0.173913	0.163043	0.663043	0.0444444	0.211111	0.744444
APOL1	7.92811	0.018986	0.173913	0.23913	0.586957	0.111111	0.111111	0.777778
APOL2	7.92811	0.018986	0.173913	0.23913	0.586957	0.111111	0.111111	0.777778
MYH9	7.92811	0.018986	0.173913	0.23913	0.586957	0.111111	0.111111	0.777778
RN7SL349P	7.92811	0.018986	0.173913	0.23913	0.586957	0.111111	0.111111	0.777778
snR65.ENSG00000253036.1	7.92294	0.0190351	0.217391	0.108696	0.673913	0.0888889	0.211111	0.7
GDPD4	7.90827	0.0191752	0.076087	0.271739	0.652174	0.0444444	0.122222	0.833333
TTC38	7.90684	0.019189	0.184783	0.282609	0.532609	0.111111	0.155556	0.733333
RN7SL17P	7.90078	0.0192472	0.195652	0.358696	0.445652	0.0666667	0.333333	0.6
U6.ENSG00000266839.2	7.90078	0.0192472	0.195652	0.358696	0.445652	0.0666667	0.333333	0.6
RALGAPB	7.88724	0.0193779	0.326087	0.0652174	0.608696	0.255556	0	0.744444
ADIG	7.88724	0.0193779	0.326087	0.0652174	0.608696	0.255556	0	0.744444
ARHGAP40	7.88724	0.0193779	0.326087	0.0652174	0.608696	0.255556	0	0.744444
KIAA0930	7.8803	0.0194453	0.195652	0.271739	0.532609	0.111111	0.155556	0.733333
PPP1R16B	7.86988	0.0195469	0.336957	0.0652174	0.597826	0.266667	0	0.733333
RN7SL116P	7.86988	0.0195469	0.336957	0.0652174	0.597826	0.266667	0	0.733333
FAM83D	7.86988	0.0195469	0.336957	0.0652174	0.597826	0.266667	0	0.733333
CTNND1	7.85925	0.019651	0.0652174	0.23913	0.695652	0.0222222	0.111111	0.866667
FAM19A5	7.85134	0.0197289	0.173913	0.304348	0.521739	0.111111	0.166667	0.722222
SCARB1	7.84541	0.0197875	0.206522	0.119565	0.673913	0.0666667	0.111111	0.822222
UBC	7.84541	0.0197875	0.206522	0.119565	0.673913	0.0666667	0.111111	0.822222
MIR5188	7.84541	0.0197875	0.206522	0.119565	0.673913	0.0666667	0.111111	0.822222
MIR3923	7.83508	0.01989	0.108696	0.206522	0.684783	0.1	0.0666667	0.833333
TST	7.83128	0.0199278	0.173913	0.23913	0.586957	0.133333	0.1	0.766667
MPST	7.83128	0.0199278	0.173913	0.23913	0.586957	0.133333	0.1	0.766667
KCTD17	7.83128	0.0199278	0.173913	0.23913	0.586957	0.133333	0.1	0.766667
RN7SKP214	7.83128	0.0199278	0.173913	0.23913	0.586957	0.133333	0.1	0.766667
IL2RB	7.83128	0.0199278	0.173913	0.23913	0.586957	0.133333	0.1	0.766667
CELSR1	7.82959	0.0199446	0.206522	0.271739	0.521739	0.111111	0.166667	0.722222
GRAMD4	7.82959	0.0199446	0.206522	0.271739	0.521739	0.111111	0.166667	0.722222
SLC17A8	7.81665	0.0200741	0.25	0.0978261	0.652174	0.1	0.0777778	0.822222
snoU13.ENSG00000238748.1	7.81665	0.0200741	0.25	0.0978261	0.652174	0.1	0.0777778	0.822222
ADORA2A	7.80152	0.0202265	0.141304	0.271739	0.586957	0.0888889	0.133333	0.777778
PIWIL3	7.80152	0.0202265	0.141304	0.271739	0.586957	0.0888889	0.133333	0.777778
SGSM1	7.80152	0.0202265	0.141304	0.271739	0.586957	0.0888889	0.133333	0.777778
SNORD56.ENSG00000199783.1	7.80152	0.0202265	0.141304	0.271739	0.586957	0.0888889	0.133333	0.777778
TMEM211	7.80152	0.0202265	0.141304	0.271739	0.586957	0.0888889	0.133333	0.777778
KIAA1671	7.80152	0.0202265	0.141304	0.271739	0.586957	0.0888889	0.133333	0.777778
CRYBB3	7.80152	0.0202265	0.141304	0.271739	0.586957	0.0888889	0.133333	0.777778
CRYBB2	7.80152	0.0202265	0.141304	0.271739	0.586957	0.0888889	0.133333	0.777778
ADRBK2	7.80152	0.0202265	0.141304	0.271739	0.586957	0.0888889	0.133333	0.777778
CRYBB2P1	7.80152	0.0202265	0.141304	0.271739	0.586957	0.0888889	0.133333	0.777778
LRP5L	7.80152	0.0202265	0.141304	0.271739	0.586957	0.0888889	0.133333	0.777778
RNA5SP494	7.80152	0.0202265	0.141304	0.271739	0.586957	0.0888889	0.133333	0.777778
HPS4	7.80152	0.0202265	0.141304	0.271739	0.586957	0.0888889	0.133333	0.777778
SRRD	7.80152	0.0202265	0.141304	0.271739	0.586957	0.0888889	0.133333	0.777778
TFIP11	7.80152	0.0202265	0.141304	0.271739	0.586957	0.0888889	0.133333	0.777778
TPST2	7.80152	0.0202265	0.141304	0.271739	0.586957	0.0888889	0.133333	0.777778
MIR548J	7.80152	0.0202265	0.141304	0.271739	0.586957	0.0888889	0.133333	0.777778
CRYBB1	7.80152	0.0202265	0.141304	0.271739	0.586957	0.0888889	0.133333	0.777778
CRYBA4	7.80152	0.0202265	0.141304	0.271739	0.586957	0.0888889	0.133333	0.777778
MIAT	7.80152	0.0202265	0.141304	0.271739	0.586957	0.0888889	0.133333	0.777778
MN1	7.80152	0.0202265	0.141304	0.271739	0.586957	0.0888889	0.133333	0.777778
KLHL3	7.79222	0.0203208	0.23913	0.184783	0.576087	0.333333	0.0555556	0.611111
MIR874	7.79222	0.0203208	0.23913	0.184783	0.576087	0.333333	0.0555556	0.611111
HNRNPA0	7.79222	0.0203208	0.23913	0.184783	0.576087	0.333333	0.0555556	0.611111
NPY6R	7.79222	0.0203208	0.23913	0.184783	0.576087	0.333333	0.0555556	0.611111
CTNNA1	7.79222	0.0203208	0.23913	0.184783	0.576087	0.333333	0.0555556	0.611111
snoU13.ENSG00000238745.1	7.79222	0.0203208	0.23913	0.184783	0.576087	0.333333	0.0555556	0.611111
NRG2	7.79222	0.0203208	0.23913	0.184783	0.576087	0.333333	0.0555556	0.611111
GUSBP11	7.78952	0.0203483	0.130435	0.293478	0.576087	0.111111	0.133333	0.755556
VPREB3	7.78952	0.0203483	0.130435	0.293478	0.576087	0.111111	0.133333	0.755556
ZNF70	7.78952	0.0203483	0.130435	0.293478	0.576087	0.111111	0.133333	0.755556
C22orf15	7.78952	0.0203483	0.130435	0.293478	0.576087	0.111111	0.133333	0.755556
CHCHD10	7.78952	0.0203483	0.130435	0.293478	0.576087	0.111111	0.133333	0.755556
MMP11	7.78952	0.0203483	0.130435	0.293478	0.576087	0.111111	0.133333	0.755556
SMARCB1	7.78952	0.0203483	0.130435	0.293478	0.576087	0.111111	0.133333	0.755556
DERL3	7.78952	0.0203483	0.130435	0.293478	0.576087	0.111111	0.133333	0.755556
SLC2A11	7.78952	0.0203483	0.130435	0.293478	0.576087	0.111111	0.133333	0.755556
RN7SL268P	7.78952	0.0203483	0.130435	0.293478	0.576087	0.111111	0.133333	0.755556
MIF	7.78952	0.0203483	0.130435	0.293478	0.576087	0.111111	0.133333	0.755556
DDTL	7.78952	0.0203483	0.130435	0.293478	0.576087	0.111111	0.133333	0.755556
DDT	7.78952	0.0203483	0.130435	0.293478	0.576087	0.111111	0.133333	0.755556
GSTT1	7.78952	0.0203483	0.130435	0.293478	0.576087	0.111111	0.133333	0.755556
GSTT2B	7.78952	0.0203483	0.130435	0.293478	0.576087	0.111111	0.133333	0.755556
GSTT2	7.78952	0.0203483	0.130435	0.293478	0.576087	0.111111	0.133333	0.755556
GSTTP2	7.78952	0.0203483	0.130435	0.293478	0.576087	0.111111	0.133333	0.755556
NXPH2	7.78696	0.0203743	0.228261	0.0978261	0.673913	0.1	0.2	0.7
ACR	7.77987	0.0204467	0.184783	0.293478	0.521739	0.111111	0.166667	0.722222
ADM2	7.77987	0.0204467	0.184783	0.293478	0.521739	0.111111	0.166667	0.722222
ALG12	7.77987	0.0204467	0.184783	0.293478	0.521739	0.111111	0.166667	0.722222
ARSA	7.77987	0.0204467	0.184783	0.293478	0.521739	0.111111	0.166667	0.722222
BRD1	7.77987	0.0204467	0.184783	0.293478	0.521739	0.111111	0.166667	0.722222
C22orf34	7.77987	0.0204467	0.184783	0.293478	0.521739	0.111111	0.166667	0.722222
CHKB	7.77987	0.0204467	0.184783	0.293478	0.521739	0.111111	0.166667	0.722222
CPT1B	7.77987	0.0204467	0.184783	0.293478	0.521739	0.111111	0.166667	0.722222
CRELD2	7.77987	0.0204467	0.184783	0.293478	0.521739	0.111111	0.166667	0.722222
DENND6B	7.77987	0.0204467	0.184783	0.293478	0.521739	0.111111	0.166667	0.722222
HDAC10	7.77987	0.0204467	0.184783	0.293478	0.521739	0.111111	0.166667	0.722222
IL17REL	7.77987	0.0204467	0.184783	0.293478	0.521739	0.111111	0.166667	0.722222
KLHDC7B	7.77987	0.0204467	0.184783	0.293478	0.521739	0.111111	0.166667	0.722222
LMF2	7.77987	0.0204467	0.184783	0.293478	0.521739	0.111111	0.166667	0.722222
MAPK11	7.77987	0.0204467	0.184783	0.293478	0.521739	0.111111	0.166667	0.722222
MAPK12	7.77987	0.0204467	0.184783	0.293478	0.521739	0.111111	0.166667	0.722222
MAPK8IP2	7.77987	0.0204467	0.184783	0.293478	0.521739	0.111111	0.166667	0.722222
MIOX	7.77987	0.0204467	0.184783	0.293478	0.521739	0.111111	0.166667	0.722222
MIR3667	7.77987	0.0204467	0.184783	0.293478	0.521739	0.111111	0.166667	0.722222
MLC1	7.77987	0.0204467	0.184783	0.293478	0.521739	0.111111	0.166667	0.722222
MOV10L1	7.77987	0.0204467	0.184783	0.293478	0.521739	0.111111	0.166667	0.722222
NCAPH2	7.77987	0.0204467	0.184783	0.293478	0.521739	0.111111	0.166667	0.722222
ODF3B	7.77987	0.0204467	0.184783	0.293478	0.521739	0.111111	0.166667	0.722222
PANX2	7.77987	0.0204467	0.184783	0.293478	0.521739	0.111111	0.166667	0.722222
PIM3	7.77987	0.0204467	0.184783	0.293478	0.521739	0.111111	0.166667	0.722222
PLXNB2	7.77987	0.0204467	0.184783	0.293478	0.521739	0.111111	0.166667	0.722222
PPP6R2	7.77987	0.0204467	0.184783	0.293478	0.521739	0.111111	0.166667	0.722222
RABL2B	7.77987	0.0204467	0.184783	0.293478	0.521739	0.111111	0.166667	0.722222
RN7SKP252	7.77987	0.0204467	0.184783	0.293478	0.521739	0.111111	0.166667	0.722222
RN7SL500P	7.77987	0.0204467	0.184783	0.293478	0.521739	0.111111	0.166667	0.722222
SBF1	7.77987	0.0204467	0.184783	0.293478	0.521739	0.111111	0.166667	0.722222
SCO2	7.77987	0.0204467	0.184783	0.293478	0.521739	0.111111	0.166667	0.722222
SHANK3	7.77987	0.0204467	0.184783	0.293478	0.521739	0.111111	0.166667	0.722222
SYCE3	7.77987	0.0204467	0.184783	0.293478	0.521739	0.111111	0.166667	0.722222
TRABD	7.77987	0.0204467	0.184783	0.293478	0.521739	0.111111	0.166667	0.722222
TTLL8	7.77987	0.0204467	0.184783	0.293478	0.521739	0.111111	0.166667	0.722222
TUBGCP6	7.77987	0.0204467	0.184783	0.293478	0.521739	0.111111	0.166667	0.722222
TYMP	7.77987	0.0204467	0.184783	0.293478	0.521739	0.111111	0.166667	0.722222
ZBED4	7.77987	0.0204467	0.184783	0.293478	0.521739	0.111111	0.166667	0.722222
MED13	7.74923	0.0207623	0.380435	0.108696	0.51087	0.233333	0.0555556	0.711111
RN7SL800P	7.74923	0.0207623	0.380435	0.108696	0.51087	0.233333	0.0555556	0.711111
MAT2B	7.74733	0.020782	0.25	0.184783	0.565217	0.344444	0.0555556	0.6
COL23A1	7.74733	0.020782	0.25	0.184783	0.565217	0.344444	0.0555556	0.6
RN7SL646P	7.74733	0.020782	0.25	0.184783	0.565217	0.344444	0.0555556	0.6
CLK4	7.74733	0.020782	0.25	0.184783	0.565217	0.344444	0.0555556	0.6
RN7SKP70	7.74733	0.020782	0.25	0.184783	0.565217	0.344444	0.0555556	0.6
ZNF354B	7.74733	0.020782	0.25	0.184783	0.565217	0.344444	0.0555556	0.6
ZFP2	7.74733	0.020782	0.25	0.184783	0.565217	0.344444	0.0555556	0.6
RUFY1	7.74733	0.020782	0.25	0.184783	0.565217	0.344444	0.0555556	0.6
HNRNPH1	7.74733	0.020782	0.25	0.184783	0.565217	0.344444	0.0555556	0.6
C5orf60	7.74733	0.020782	0.25	0.184783	0.565217	0.344444	0.0555556	0.6
CANX	7.74733	0.020782	0.25	0.184783	0.565217	0.344444	0.0555556	0.6
CBY3	7.74733	0.020782	0.25	0.184783	0.565217	0.344444	0.0555556	0.6
HMGB3P22	7.74733	0.020782	0.25	0.184783	0.565217	0.344444	0.0555556	0.6
THRA	7.71511	0.0211196	0.293478	0.152174	0.554348	0.144444	0.111111	0.744444
NR1D1	7.71511	0.0211196	0.293478	0.152174	0.554348	0.144444	0.111111	0.744444
MIR4461	7.71137	0.0211591	0.206522	0.195652	0.597826	0.311111	0.0666667	0.622222
H2AFY	7.71137	0.0211591	0.206522	0.195652	0.597826	0.311111	0.0666667	0.622222
C5orf20	7.71137	0.0211591	0.206522	0.195652	0.597826	0.311111	0.0666667	0.622222
TIFAB	7.71137	0.0211591	0.206522	0.195652	0.597826	0.311111	0.0666667	0.622222
NEUROG1	7.71137	0.0211591	0.206522	0.195652	0.597826	0.311111	0.0666667	0.622222
CXCL14	7.71137	0.0211591	0.206522	0.195652	0.597826	0.311111	0.0666667	0.622222
TRPC7	7.71137	0.0211591	0.206522	0.195652	0.597826	0.311111	0.0666667	0.622222
C20orf203	7.71005	0.0211731	0.326087	0.0543478	0.619565	0.233333	0	0.766667
MAPRE1	7.71005	0.0211731	0.326087	0.0543478	0.619565	0.233333	0	0.766667
EFCAB8	7.71005	0.0211731	0.326087	0.0543478	0.619565	0.233333	0	0.766667
SUN5	7.71005	0.0211731	0.326087	0.0543478	0.619565	0.233333	0	0.766667
BPIFB2	7.71005	0.0211731	0.326087	0.0543478	0.619565	0.233333	0	0.766667
BPIFB6	7.71005	0.0211731	0.326087	0.0543478	0.619565	0.233333	0	0.766667
BPIFB3	7.71005	0.0211731	0.326087	0.0543478	0.619565	0.233333	0	0.766667
BPIFB4	7.71005	0.0211731	0.326087	0.0543478	0.619565	0.233333	0	0.766667
BPIFA2	7.71005	0.0211731	0.326087	0.0543478	0.619565	0.233333	0	0.766667
BPIFA4P	7.71005	0.0211731	0.326087	0.0543478	0.619565	0.233333	0	0.766667
BPIFA3	7.71005	0.0211731	0.326087	0.0543478	0.619565	0.233333	0	0.766667
BPIFA1	7.71005	0.0211731	0.326087	0.0543478	0.619565	0.233333	0	0.766667
BCL7A	7.70737	0.0212014	0.206522	0.141304	0.652174	0.0777778	0.1	0.822222
B3GNT4	7.70737	0.0212014	0.206522	0.141304	0.652174	0.0777778	0.1	0.822222
DIABLO	7.70737	0.0212014	0.206522	0.141304	0.652174	0.0777778	0.1	0.822222
VPS33A	7.70737	0.0212014	0.206522	0.141304	0.652174	0.0777778	0.1	0.822222
HNF1A	7.69006	0.0213857	0.217391	0.119565	0.663043	0.0777778	0.1	0.822222
C12orf43	7.69006	0.0213857	0.217391	0.119565	0.663043	0.0777778	0.1	0.822222
OASL	7.69006	0.0213857	0.217391	0.119565	0.663043	0.0777778	0.1	0.822222
MYO18B	7.67983	0.0214954	0.152174	0.26087	0.586957	0.0888889	0.133333	0.777778
RN7SKP169	7.67983	0.0214954	0.152174	0.26087	0.586957	0.0888889	0.133333	0.777778
BCAS4	7.67922	0.021502	0.326087	0.076087	0.597826	0.3	0	0.7
TEX2	7.67346	0.021564	0.380435	0.108696	0.51087	0.222222	0.0666667	0.711111
GABRA1	7.6731	0.0215678	0.228261	0.173913	0.597826	0.344444	0.0555556	0.6
CBFA2T2	7.66854	0.0216171	0.336957	0.0543478	0.608696	0.244444	0	0.755556
C20orf144	7.66854	0.0216171	0.336957	0.0543478	0.608696	0.244444	0	0.755556
MIR4755	7.66854	0.0216171	0.336957	0.0543478	0.608696	0.244444	0	0.755556
EIF2S2	7.66854	0.0216171	0.336957	0.0543478	0.608696	0.244444	0	0.755556
MAPK1	7.65196	0.021797	0.130435	0.271739	0.597826	0.1	0.122222	0.777778
RNA5SP493	7.65196	0.021797	0.130435	0.271739	0.597826	0.1	0.122222	0.777778
CDRT15L2	7.64965	0.0218222	0.184783	0.358696	0.456522	0.0666667	0.311111	0.622222
CCDC144NL	7.64965	0.0218222	0.184783	0.358696	0.456522	0.0666667	0.311111	0.622222
U3.ENSG00000212551.1	7.64874	0.0218322	0.076087	0.23913	0.684783	0.0444444	0.1	0.855556
WT1	7.64874	0.0218322	0.076087	0.23913	0.684783	0.0444444	0.1	0.855556
EIF3M	7.64874	0.0218322	0.076087	0.23913	0.684783	0.0444444	0.1	0.855556
CSTF3	7.64874	0.0218322	0.076087	0.23913	0.684783	0.0444444	0.1	0.855556
ELF5	7.64874	0.0218322	0.076087	0.23913	0.684783	0.0444444	0.1	0.855556
APIP	7.64874	0.0218322	0.076087	0.23913	0.684783	0.0444444	0.1	0.855556
PDHX	7.64874	0.0218322	0.076087	0.23913	0.684783	0.0444444	0.1	0.855556
MIR1343	7.64874	0.0218322	0.076087	0.23913	0.684783	0.0444444	0.1	0.855556
MIR648	7.64396	0.0218844	0.141304	0.271739	0.586957	0.111111	0.122222	0.766667
LRRC10B	7.64365	0.0218878	0.0543478	0.26087	0.684783	0.0333333	0.111111	0.855556
MIR4488	7.64365	0.0218878	0.0543478	0.26087	0.684783	0.0333333	0.111111	0.855556
SYT7	7.64365	0.0218878	0.0543478	0.26087	0.684783	0.0333333	0.111111	0.855556
ASRGL1	7.64365	0.0218878	0.0543478	0.26087	0.684783	0.0333333	0.111111	0.855556
NXF1	7.64365	0.0218878	0.0543478	0.26087	0.684783	0.0333333	0.111111	0.855556
STX5	7.64365	0.0218878	0.0543478	0.26087	0.684783	0.0333333	0.111111	0.855556
RN7SL119P	7.64365	0.0218878	0.0543478	0.26087	0.684783	0.0333333	0.111111	0.855556
WDR74	7.64365	0.0218878	0.0543478	0.26087	0.684783	0.0333333	0.111111	0.855556
SNHG1	7.64365	0.0218878	0.0543478	0.26087	0.684783	0.0333333	0.111111	0.855556
SLC3A2	7.64365	0.0218878	0.0543478	0.26087	0.684783	0.0333333	0.111111	0.855556
HINT1	7.64118	0.0219149	0.217391	0.195652	0.586957	0.322222	0.0666667	0.611111
TMEM132B	7.63524	0.02198	0.206522	0.119565	0.673913	0.0666667	0.122222	0.811111
LINC00943	7.63524	0.02198	0.206522	0.119565	0.673913	0.0666667	0.122222	0.811111
LINC00944	7.63524	0.02198	0.206522	0.119565	0.673913	0.0666667	0.122222	0.811111
RAB30	7.61231	0.0222335	0.0543478	0.282609	0.663043	0.0444444	0.122222	0.833333
SNORA70E	7.61231	0.0222335	0.0543478	0.282609	0.663043	0.0444444	0.122222	0.833333
PCF11	7.61231	0.0222335	0.0543478	0.282609	0.663043	0.0444444	0.122222	0.833333
ULK2	7.57335	0.0226708	0.195652	0.358696	0.445652	0.0666667	0.344444	0.588889
SPECC1	7.57335	0.0226708	0.195652	0.358696	0.445652	0.0666667	0.344444	0.588889
DHCR7	7.56393	0.0227779	0.0652174	0.26087	0.673913	0.0444444	0.111111	0.844444
TCP11L1	7.54314	0.0230159	0.0869565	0.23913	0.673913	0.0555556	0.1	0.844444
NAGA	7.54146	0.0230353	0.184783	0.25	0.565217	0.0888889	0.155556	0.755556
FAM109B	7.54146	0.0230353	0.184783	0.25	0.565217	0.0888889	0.155556	0.755556
snoU13.ENSG00000238498.1	7.54146	0.0230353	0.184783	0.25	0.565217	0.0888889	0.155556	0.755556
SMDT1	7.54146	0.0230353	0.184783	0.25	0.565217	0.0888889	0.155556	0.755556
NDUFA6	7.54146	0.0230353	0.184783	0.25	0.565217	0.0888889	0.155556	0.755556
CYP2D6	7.54146	0.0230353	0.184783	0.25	0.565217	0.0888889	0.155556	0.755556
CYP2D7P1	7.54146	0.0230353	0.184783	0.25	0.565217	0.0888889	0.155556	0.755556
SPOCK1	7.53303	0.0231326	0.25	0.184783	0.565217	0.333333	0.0555556	0.611111
MAML1	7.53303	0.0231326	0.25	0.184783	0.565217	0.333333	0.0555556	0.611111
LTC4S	7.53303	0.0231326	0.25	0.184783	0.565217	0.333333	0.0555556	0.611111
MGAT4B	7.53303	0.0231326	0.25	0.184783	0.565217	0.333333	0.0555556	0.611111
MIR1229	7.53303	0.0231326	0.25	0.184783	0.565217	0.333333	0.0555556	0.611111
RN7SKP150	7.53303	0.0231326	0.25	0.184783	0.565217	0.333333	0.0555556	0.611111
TBC1D9B	7.53303	0.0231326	0.25	0.184783	0.565217	0.333333	0.0555556	0.611111
RNF130	7.53303	0.0231326	0.25	0.184783	0.565217	0.333333	0.0555556	0.611111
MIR340	7.53303	0.0231326	0.25	0.184783	0.565217	0.333333	0.0555556	0.611111
GTPBP1	7.53108	0.0231551	0.173913	0.25	0.576087	0.133333	0.111111	0.755556
ABHD15	7.50313	0.023481	0.271739	0.152174	0.576087	0.144444	0.0888889	0.766667
GIT1	7.50313	0.023481	0.271739	0.152174	0.576087	0.144444	0.0888889	0.766667
TP53I13	7.50313	0.023481	0.271739	0.152174	0.576087	0.144444	0.0888889	0.766667
ANKRD13B	7.50313	0.023481	0.271739	0.152174	0.576087	0.144444	0.0888889	0.766667
CORO6	7.50313	0.023481	0.271739	0.152174	0.576087	0.144444	0.0888889	0.766667
SSH2	7.50313	0.023481	0.271739	0.152174	0.576087	0.144444	0.0888889	0.766667
MYH3	7.50274	0.0234856	0.076087	0.576087	0.347826	0	0.577778	0.422222
SCO1	7.50274	0.0234856	0.076087	0.576087	0.347826	0	0.577778	0.422222
TBC1D26	7.50102	0.0235058	0.0978261	0.521739	0.380435	0.0111111	0.5	0.488889
ZNF286A	7.50102	0.0235058	0.0978261	0.521739	0.380435	0.0111111	0.5	0.488889
RNA5SP436	7.50102	0.0235058	0.0978261	0.521739	0.380435	0.0111111	0.5	0.488889
ADORA2B	7.50102	0.0235058	0.0978261	0.521739	0.380435	0.0111111	0.5	0.488889
ZSWIM7	7.50102	0.0235058	0.0978261	0.521739	0.380435	0.0111111	0.5	0.488889
TTC19	7.50102	0.0235058	0.0978261	0.521739	0.380435	0.0111111	0.5	0.488889
ZNF454	7.50101	0.0235059	0.26087	0.184783	0.554348	0.344444	0.0555556	0.6
GRM6	7.50101	0.0235059	0.26087	0.184783	0.554348	0.344444	0.0555556	0.6
ZNF879	7.50101	0.0235059	0.26087	0.184783	0.554348	0.344444	0.0555556	0.6
ZNF354C	7.50101	0.0235059	0.26087	0.184783	0.554348	0.344444	0.0555556	0.6
BTNL8	7.50101	0.0235059	0.26087	0.184783	0.554348	0.344444	0.0555556	0.6
KCNA4	7.47893	0.0237669	0.076087	0.23913	0.684783	0.0333333	0.111111	0.855556
FSHB	7.47893	0.0237669	0.076087	0.23913	0.684783	0.0333333	0.111111	0.855556
ARL14EP	7.47893	0.0237669	0.076087	0.23913	0.684783	0.0333333	0.111111	0.855556
TRAF6	7.47893	0.0237669	0.076087	0.23913	0.684783	0.0333333	0.111111	0.855556
RAG2	7.47893	0.0237669	0.076087	0.23913	0.684783	0.0333333	0.111111	0.855556
C11orf74	7.47893	0.0237669	0.076087	0.23913	0.684783	0.0333333	0.111111	0.855556
MIR548O2	7.47768	0.0237816	0.315217	0.0652174	0.619565	0.255556	0	0.744444
POLD4	7.47171	0.0238527	0.0978261	0.23913	0.663043	0.0666667	0.1	0.833333
RN7SKP239	7.47171	0.0238527	0.0978261	0.23913	0.663043	0.0666667	0.1	0.833333
CLCF1	7.47171	0.0238527	0.0978261	0.23913	0.663043	0.0666667	0.1	0.833333
PPP1CA	7.47171	0.0238527	0.0978261	0.23913	0.663043	0.0666667	0.1	0.833333
OR5G5P	7.46944	0.0238798	0.0326087	0.25	0.717391	0.0222222	0.1	0.877778
ADNP	7.46669	0.0239127	0.326087	0.076087	0.597826	0.311111	0	0.688889
DPM1	7.46669	0.0239127	0.326087	0.076087	0.597826	0.311111	0	0.688889
MOCS3	7.46669	0.0239127	0.326087	0.076087	0.597826	0.311111	0	0.688889
KCNG1	7.46669	0.0239127	0.326087	0.076087	0.597826	0.311111	0	0.688889
SLC32A1	7.46526	0.0239298	0.326087	0.0652174	0.608696	0.266667	0	0.733333
ACTR5	7.46526	0.0239298	0.326087	0.0652174	0.608696	0.266667	0	0.733333
RN7SKP173	7.46526	0.0239298	0.326087	0.0652174	0.608696	0.266667	0	0.733333
CCDC158	7.46271	0.0239604	0.076087	0.380435	0.543478	0	0.455556	0.544444
ACVR2A	7.44447	0.0241799	0.217391	0.141304	0.641304	0.0888889	0.244444	0.666667
GCGR	7.43375	0.0243098	0.402174	0.119565	0.478261	0.244444	0.0777778	0.677778
PIPOX	7.42468	0.0244203	0.293478	0.141304	0.565217	0.155556	0.0888889	0.755556
SEZ6	7.42468	0.0244203	0.293478	0.141304	0.565217	0.155556	0.0888889	0.755556
SCYL2	7.42263	0.0244454	0.23913	0.108696	0.652174	0.1	0.0777778	0.822222
RBM14	7.42244	0.0244477	0.0869565	0.25	0.663043	0.0777778	0.1	0.822222
RBM4	7.42244	0.0244477	0.0869565	0.25	0.663043	0.0777778	0.1	0.822222
ANKRD13D	7.42244	0.0244477	0.0869565	0.25	0.663043	0.0777778	0.1	0.822222
PRPSAP2	7.41615	0.0245247	0.195652	0.402174	0.402174	0.0666667	0.4	0.533333
C11orf80	7.41442	0.0245459	0.076087	0.25	0.673913	0.0666667	0.1	0.833333
SSH3	7.41442	0.0245459	0.076087	0.25	0.673913	0.0666667	0.1	0.833333
ANXA2	7.41358	0.0245562	0.141304	0.23913	0.619565	0.0888889	0.111111	0.8
NARG2	7.41358	0.0245562	0.141304	0.23913	0.619565	0.0888889	0.111111	0.8
RNA5SP397	7.41358	0.0245562	0.141304	0.23913	0.619565	0.0888889	0.111111	0.8
FAM182A	7.40391	0.0246752	0.336957	0.076087	0.586957	0.244444	0.0111111	0.744444
NCOR1P1	7.40391	0.0246752	0.336957	0.076087	0.586957	0.244444	0.0111111	0.744444
GABRB3	7.40236	0.0246944	0.119565	0.25	0.630435	0.0666667	0.122222	0.811111
GABRA5	7.40236	0.0246944	0.119565	0.25	0.630435	0.0666667	0.122222	0.811111
GABRG3	7.40236	0.0246944	0.119565	0.25	0.630435	0.0666667	0.122222	0.811111
RNA5SP391	7.40236	0.0246944	0.119565	0.25	0.630435	0.0666667	0.122222	0.811111
OCA2	7.40236	0.0246944	0.119565	0.25	0.630435	0.0666667	0.122222	0.811111
FAN1	7.40042	0.0247183	0.141304	0.228261	0.630435	0.0666667	0.122222	0.811111
MTMR10	7.40042	0.0247183	0.141304	0.228261	0.630435	0.0666667	0.122222	0.811111
MIR211	7.40042	0.0247183	0.141304	0.228261	0.630435	0.0666667	0.122222	0.811111
OTUD7A	7.40042	0.0247183	0.141304	0.228261	0.630435	0.0666667	0.122222	0.811111
ATP6V1E1	7.39465	0.0247898	0.130435	0.282609	0.586957	0.1	0.133333	0.766667
snoU13.ENSG00000251737.1	7.39465	0.0247898	0.130435	0.282609	0.586957	0.1	0.133333	0.766667
SUSD2	7.38762	0.0248771	0.141304	0.282609	0.576087	0.111111	0.133333	0.755556
GGT5	7.38762	0.0248771	0.141304	0.282609	0.576087	0.111111	0.133333	0.755556
CCDC134	7.3842	0.0249196	0.184783	0.25	0.565217	0.111111	0.133333	0.755556
CD7	7.36215	0.0251959	0.413043	0.119565	0.467391	0.255556	0.0777778	0.666667
SECTM1	7.36215	0.0251959	0.413043	0.119565	0.467391	0.255556	0.0777778	0.666667
TEX19	7.36215	0.0251959	0.413043	0.119565	0.467391	0.255556	0.0777778	0.666667
UTS2R	7.36215	0.0251959	0.413043	0.119565	0.467391	0.255556	0.0777778	0.666667
OGFOD3	7.36215	0.0251959	0.413043	0.119565	0.467391	0.255556	0.0777778	0.666667
HEXDC	7.36215	0.0251959	0.413043	0.119565	0.467391	0.255556	0.0777778	0.666667
C17orf62	7.36215	0.0251959	0.413043	0.119565	0.467391	0.255556	0.0777778	0.666667
FOXK2	7.36215	0.0251959	0.413043	0.119565	0.467391	0.255556	0.0777778	0.666667
snoU13.ENSG00000238403.1	7.36215	0.0251959	0.413043	0.119565	0.467391	0.255556	0.0777778	0.666667
WDR45B	7.36215	0.0251959	0.413043	0.119565	0.467391	0.255556	0.0777778	0.666667
RAB40B	7.36215	0.0251959	0.413043	0.119565	0.467391	0.255556	0.0777778	0.666667
MIR4525	7.36215	0.0251959	0.413043	0.119565	0.467391	0.255556	0.0777778	0.666667
FN3KRP	7.36215	0.0251959	0.413043	0.119565	0.467391	0.255556	0.0777778	0.666667
FN3K	7.36215	0.0251959	0.413043	0.119565	0.467391	0.255556	0.0777778	0.666667
TBCD	7.36215	0.0251959	0.413043	0.119565	0.467391	0.255556	0.0777778	0.666667
ZNF750	7.36215	0.0251959	0.413043	0.119565	0.467391	0.255556	0.0777778	0.666667
SREBF2	7.35156	0.0253296	0.184783	0.25	0.565217	0.1	0.144444	0.755556
CENPM	7.35156	0.0253296	0.184783	0.25	0.565217	0.1	0.144444	0.755556
LINC00634	7.35156	0.0253296	0.184783	0.25	0.565217	0.1	0.144444	0.755556
MIR33A	7.35156	0.0253296	0.184783	0.25	0.565217	0.1	0.144444	0.755556
MIR378I	7.35156	0.0253296	0.184783	0.25	0.565217	0.1	0.144444	0.755556
X3.Sep	7.35156	0.0253296	0.184783	0.25	0.565217	0.1	0.144444	0.755556
SHISA8	7.35156	0.0253296	0.184783	0.25	0.565217	0.1	0.144444	0.755556
TNFRSF13C	7.35156	0.0253296	0.184783	0.25	0.565217	0.1	0.144444	0.755556
WBP2NL	7.35156	0.0253296	0.184783	0.25	0.565217	0.1	0.144444	0.755556
SPPL3	7.34962	0.0253542	0.217391	0.108696	0.673913	0.0777778	0.1	0.822222
SNORA70.ENSG00000201945.1	7.34962	0.0253542	0.217391	0.108696	0.673913	0.0777778	0.1	0.822222
CSF2	7.34861	0.0253671	0.217391	0.195652	0.586957	0.311111	0.0666667	0.622222
snoZ6.ENSG00000253067.1	7.34861	0.0253671	0.217391	0.195652	0.586957	0.311111	0.0666667	0.622222
P4HA2	7.34861	0.0253671	0.217391	0.195652	0.586957	0.311111	0.0666667	0.622222
PDLIM4	7.34861	0.0253671	0.217391	0.195652	0.586957	0.311111	0.0666667	0.622222
SLC22A4	7.34861	0.0253671	0.217391	0.195652	0.586957	0.311111	0.0666667	0.622222
RAD50	7.34861	0.0253671	0.217391	0.195652	0.586957	0.311111	0.0666667	0.622222
IL13	7.34861	0.0253671	0.217391	0.195652	0.586957	0.311111	0.0666667	0.622222
IL4	7.34861	0.0253671	0.217391	0.195652	0.586957	0.311111	0.0666667	0.622222
KIF3A	7.34861	0.0253671	0.217391	0.195652	0.586957	0.311111	0.0666667	0.622222
CCNI2	7.34861	0.0253671	0.217391	0.195652	0.586957	0.311111	0.0666667	0.622222
X8.Sep	7.34861	0.0253671	0.217391	0.195652	0.586957	0.311111	0.0666667	0.622222
SOWAHA	7.34861	0.0253671	0.217391	0.195652	0.586957	0.311111	0.0666667	0.622222
SHROOM1	7.34861	0.0253671	0.217391	0.195652	0.586957	0.311111	0.0666667	0.622222
ZCCHC10	7.34861	0.0253671	0.217391	0.195652	0.586957	0.311111	0.0666667	0.622222
HSPA4	7.34861	0.0253671	0.217391	0.195652	0.586957	0.311111	0.0666667	0.622222
snoU13.ENSG00000238796.1	7.34861	0.0253671	0.217391	0.195652	0.586957	0.311111	0.0666667	0.622222
C5orf15	7.34861	0.0253671	0.217391	0.195652	0.586957	0.311111	0.0666667	0.622222
[truncated: 1,399 more rows]
