# Supplementary material for: Hypoxia associated multi-omics molecular landscape of tumor tissue in patients with hepatocellular carcinoma
Source: Aging (Albany NY). 2021 Mar 10;13(5):6525–53. doi: 10.18632/aging.202723 (PMC7993683; doi:10.18632/aging.202723)
Supplement: Supplementary Table 10 [file aging-13-202723-s010.xlsx]

## Sheet: Table S10
Supplementary Table 10. Significant difference in DNA methylation level between high hypoxia score and low hypoxia score groups in TCGA-LIHC
site	Gene	methylation level	adj.P.Val
cg23426945	ZNF503-AS2	Reduced	5.25e-07
cg01889574	CD82	Reduced	5.87e-07
cg03889263	TBL1XR1	Reduced	7.99e-07
cg17983217	DDAH2	Reduced	1.17e-05
cg22689909	GLRX	Reduced	2.22e-06
cg26541218	PKD1L1,C7orf69	Reduced	5.25e-07
cg25654695	OAZ1	Reduced	6.08e-05
cg20942867	SLC9A1	Reduced	5.75e-06
cg08128274	DYRK3	Reduced	3.69e-05
cg07815287	ASAP2	Reduced	1.78e-05
cg22525688	GTF2IRD1,GTF2I	Reduced	1.25e-05
cg03354554	LOC440028	Reduced	1.07e-05
cg21435684	BC033560	Reduced	0.00114024
cg22610620	C10orf11	Reduced	2.06e-06
cg23174662	HIF1A	Reduced	3.93e-06
cg18055007	DDAH2	Reduced	1.86e-05
cg16677191	GLRX	Reduced	2.44e-06
cg08105396	S100A2	Reduced	4.02e-05
cg26340149	ANO1	Reduced	1.58e-06
cg04293307	AXIN2	Reduced	2.18e-05
cg20503956	CA13	Reduced	7.28e-05
cg06075789	ZFP36	Reduced	0.00121613
cg19090437	TBC1D1	Reduced	5.87e-07
cg23471612	TRNA_Asp	Reduced	0.00041167
cg06045337	PLEC1,PLEC	Reduced	0.00025462
cg24067911	ATXN1	Reduced	0.00019864
cg06100807	RHCG	Reduced	9.29e-05
cg00124375	DDAH2	Reduced	2.99e-05
cg17382541	MYADM	Reduced	5.2e-05
cg03367387	KIAA0226	Reduced	2.5e-05
cg27449507	THSD4	Reduced	1.19e-06
cg10753610	ITGB3	Reduced	4.47e-06
cg09442403	TM4SF1	Reduced	1.97e-05
cg00056433	TRNA_Glu	Reduced	0.000218191
cg08467103	SPRED2	Reduced	0.0015943
cg03707168	PPP1R15A	Reduced	1.04e-05
cg05343811	NEK9	Reduced	4.55e-05
cg10011232	FKBP8	Reduced	0.000138218
cg00107982	ELFN2	Reduced	0.00102445
cg19770281	CCRL1	Reduced	2.24e-05
cg03852144	GLRX	Reduced	0.000152321
cg24174557	TMEM49,MIR21	Reduced	3.04e-05
cg09317128	TMEM165	Reduced	3.83e-06
cg08592234	AK055145	Reduced	0.000124575
cg24897392	ATP1B1	Reduced	6.34e-06
cg14741228	FLJ13224,FAM60A	Reduced	9.34e-05
cg10574006	ZNF608	Reduced	1.46e-05
cg17952661	TRNA_Lys	Reduced	0.000509787
cg22234930	PKM2	Reduced	2.02e-05
cg04797170	TMSB10	Reduced	0.00356641
cg12232146	PHLDA1	Reduced	9.53e-07
cg06578342	TFAP4	Reduced	2.77e-06
cg24399924	ATOH8	Reduced	4.71e-05
cg04759376	ZNF503-AS2	Reduced	5.25e-07
cg01702055	LOC100130357	Reduced	7.94e-05
cg12457415	CLIC1	Reduced	1.07e-05
cg06236559	SMAD2	Reduced	0.000108883
cg05143530	KIAA0226	Reduced	7.28e-05
cg24505687	BAK1	Reduced	2.39e-05
cg18582260	PARP4	Reduced	0.00125947
cg18693051	SBNO2	Reduced	4.12e-05
cg05493841	BEST3	Reduced	0.000152321
cg01413054	CAB39	Reduced	0.000360747
cg09678939	ZC3H12D	Reduced	0.000360336
cg27118035	ZNF267	Reduced	2.11e-05
cg17172331	TNRC6C,AK123771	Reduced	7.39e-05
cg26403843	RNF145	Reduced	2.31e-05
cg05374271	RGS2	Reduced	0.000153745
cg19724567	IFRD1	Reduced	1.29e-05
cg27270412	NRP1	Reduced	7.28e-05
cg03294491	SMAD2	Reduced	0.000187376
cg06433467	PIK3R1	Reduced	0.000251744
cg10949007	GLRX	Reduced	0.000124575
cg16643088	CSRNP1	Reduced	9.74e-05
cg08003353	C13orf33	Reduced	0.00549074
cg23689428	LOC84931	Reduced	0.00280587
cg03464229	C7orf58	Reduced	3.01e-05
cg23654821	CSRNP1	Reduced	8.47e-05
cg09887589	CLIC1	Reduced	3.58e-05
cg16709353	TPCN2,BC064339	Reduced	6.89e-05
cg19405555	ANPEP	Reduced	1.24e-05
cg13275603	ENC1	Reduced	5.73e-05
cg18949786	TMEM223,NXF1	Reduced	1.24e-05
cg17178175	NFE2L2,MIR3128	Reduced	1.45e-05
cg25581222	CSNK1G1	Reduced	0.000201091
cg09866743	ARPP-21,ARPP21	Reduced	0.000493899
cg21585512	LOC399959,MIR100	Reduced	3.61e-05
cg12611448	LIPH	Reduced	2.31e-05
cg14633252	SHB,BC021061	Reduced	0.000119862
cg22502206	ANXA2	Reduced	0.000992643
cg12592365	RPTOR	Reduced	0.000515301
cg09276315	ZC3H4	Reduced	0.00546932
cg08916461	LOC100287010	Reduced	0.000118301
cg11205006	HPS4	Reduced	0.000267632
cg26579550	THSD4	Reduced	0.000277768
cg09431416	SEC14L1	Reduced	0.000677423
cg15346168	NFATC4	Reduced	0.00605876
cg04650676	SEPT9,41161	Reduced	0.000308398
cg26111575	TACC2	Reduced	6.97e-06
cg13699887	ATXN1,GMPR	Reduced	0.00102445
cg09884146	SPRED2	Reduced	0.00167465
cg20717932	THRA	Reduced	2.77e-06
cg09055236	TTYH3	Reduced	0.000887706
cg08572315	TMSB10	Reduced	0.00946761
cg26232247	RIN2	Reduced	5.71e-05
cg25034557	PACS1	Reduced	0.000186758
cg23324953	PLEC1,PLEC	Reduced	0.000515301
cg05912212	PVRL1	Reduced	2.22e-06
cg14416623	NCKAP5,BC031872	Reduced	4.41e-05
cg22951728	GDI1	Reduced	0.00361747
cg13029400	ZBTB38	Reduced	0.00153481
cg26780138	RAB11FIP3	Reduced	3.04e-05
cg18516619	RPTOR	Reduced	0.00268229
cg19313221	KDM4B	Reduced	3.68e-05
cg22611980	TBL1XR1	Reduced	0.000224633
cg01576275	PACSIN2	Reduced	6.34e-06
cg01973676	CUX1	Reduced	0.00322343
cg22142922	ANO1	Reduced	5.25e-07
cg00207280	TRIB1	Reduced	1.58e-06
cg26376241	SPRED2	Reduced	0.00287501
cg01751245	SPRED2	Reduced	0.00141871
cg01730064	ARID4B	Reduced	0.000311577
cg04844574	KDM2B	Reduced	3.03e-05
cg07718903	FERMT1	Reduced	0.000703486
cg07499182	STARD13	Reduced	0.000389321
cg07551060	GRK5,MIR4681	Reduced	6.08e-05
cg26588076	SREBF1	Reduced	6.08e-05
cg13052638	RASSF5	Reduced	4.14e-05
cg19128723	OBFC1	Reduced	0.00020195
cg04261496	FOXK1	Reduced	0.00144651
cg11481582	DNAJB12	Reduced	6.08e-05
cg14200127	DPYD,PTBLP	Reduced	0.00104043
cg26788216	IL1RL2	Reduced	0.000466726
cg09015280	BC036310	Reduced	0.00047987
cg03577157	SSBP2,RNU5E,RNU5D,ACOT12	Reduced	0.000143642
cg14834675	BEST3	Reduced	0.000847715
cg12750917	NEK7	Reduced	0.00102445
cg16730737	CLIC1	Reduced	3.99e-06
cg13181974	MEIS2	Reduced	0.00192273
cg05970116	USP54	Reduced	4.11e-05
cg06613738	C16orf45	Reduced	0.000179595
cg21608605	ESR1	Reduced	0.00115172
cg05673882	POLK	Reduced	0.000193699
cg04211581	ESR1	Reduced	0.000218191
cg05132999	TTC39A	Reduced	2.69e-05
cg06405186	SYT7,LRRC10B	Reduced	0.00316325
cg19252931	C11orf91	Reduced	0.00178651
cg01488159	BC039551	Reduced	0.0011047
cg18882687	ARF1	Reduced	1.07e-05
cg18442362	OGDH	Reduced	8.69e-05
cg04144611	C1orf96	Reduced	0.0037096
cg16558770	ZNF710	Reduced	3.8e-05
cg04434593	CLCF1,LOC100130987	Reduced	0.00357288
cg22870189	CDK4,DM110804	Reduced	0.000231046
cg14823429	HDAC4	Reduced	0.00011842
cg10380585	TRAF5	Reduced	0.000807643
cg21532636	MB	Reduced	1.58e-05
cg19972648	KCNMA1	Reduced	1.17e-05
cg17117459	PARP4	Reduced	0.00141492
cg24931092	UBA2	Reduced	1.58e-06
cg11334644	LOC100190940	Reduced	4.14e-05
cg03935116	FLJ13224,FAM60A	Reduced	0.00022794
cg10523105	PNMA1	Reduced	8.15e-05
cg17797591	AXIN2	Reduced	0.00407888
cg00640314	SNORD87,SNHG6	Reduced	0.000699948
cg02518245	7SK	Reduced	6.08e-05
cg18236464	PAPPA2	Reduced	0.00102902
cg23493132	MYADM	Reduced	0.000779054
cg02779592	SRPX2	Reduced	0.00118242
cg23425762	ZBTB7C	Reduced	7.08e-05
cg20341504	SPTBN1	Reduced	0.00391501
cg23894287	PLEKHA2	Reduced	1.92e-05
cg13991834	BCL2L15	Reduced	0.00016227
cg15460348	SPP1	Reduced	0.00260659
cg01280128	KLC2,RAB1B	Reduced	0.00442464
cg15202500	C10orf11,Metazoa_SRP	Reduced	1.58e-06
cg03359362	SLC1A5	Reduced	0.00116137
cg12668309	CACNA1D	Reduced	0.00209385
cg18007957	ESR1	Reduced	0.00047145
cg26546113	DHX9	Reduced	0.00157176
cg19542346	CDK4,DM110804	Reduced	0.00013002
cg20765408	PARP4	Reduced	0.00176947
cg19050555	TUBA1C	Reduced	3.59e-05
cg20118643	ANXA2	Reduced	0.00209259
cg26534425	IL18	Reduced	0.000195881
cg22169990	AGAP3	Reduced	0.00167391
cg05471169	BC033560	Reduced	0.00177602
cg05117638	MARCKS	Reduced	7.94e-05
cg21176130	HLA-E	Reduced	0.000814748
cg02101812	BC036308	Reduced	0.00201621
cg11230435	MAP3K8	Reduced	0.000821089
cg10373891	DHRS12	Reduced	5.9e-05
cg26706803	ADCY7	Reduced	0.000139771
cg25788549	AGAP3	Reduced	0.0027414
cg07679836	BAK1	Reduced	0.000146727
cg07220903	CCDC12	Reduced	0.000152058
cg12423344	AES	Reduced	0.00191185
cg02386420	RPTOR	Reduced	0.002697
cg13531596	ZFP36	Reduced	0.00512069
cg12725760	7SK	Reduced	0.00162078
cg11525980	PC	Reduced	0.000514722
cg12420472	TRNA_Lys	Reduced	0.00130527
cg11927233	NPM1	Reduced	0.00103127
cg02584193	TRNA_Asp	Reduced	0.000764739
cg19918734	ME3	Reduced	2.59e-05
cg10503655	EYA2	Reduced	3.2e-06
cg07866131	TYRO3	Reduced	0.000176892
cg01690062	SIX1	Reduced	4.09e-05
cg27505627	BAIAP2L2	Reduced	0.00192964
cg00937742	LYPD1	Reduced	8.41e-05
cg26513689	DAB1	Reduced	3.2e-06
cg03909356	SEPT9,41161	Reduced	1.13e-05
cg11006453	EIF2C2	Reduced	0.00130089
cg22679626	TMSB4X	Reduced	0.00197722
cg10684686	AK056211	Reduced	0.00237785
cg02229757	KIAA0430	Reduced	0.0034162
cg21382890	NFE2L2,MIR3128	Reduced	1.92e-05
cg23739746	RASA3	Reduced	0.000767385
cg24127639	MYEOV	Reduced	0.000837019
cg18118490	SAMD4A	Reduced	2.54e-05
cg26284735	LOC100507582	Reduced	0.00243879
cg13169132	TMEM88B	Reduced	0.000641614
cg23023970	INPP5A	Reduced	4.15e-05
cg12686441	AK126209	Reduced	0.00039902
cg25731261	BBC3	Reduced	0.0051128
cg08881019	LMNA	Reduced	6.28e-06
cg15744128	GPN1,CCDC121	Reduced	0.000466726
cg11091914	LRP12	Reduced	0.00203915
cg19944876	NTN1	Reduced	0.000209592
cg08549335	ZNRF2,DKFZP586I1420	Reduced	0.000293255
cg02227919	LOC440925	Reduced	0.000153745
cg21887193	AGAP3	Reduced	0.00571719
cg23958704	AK127183	Reduced	0.000371695
cg19913563	IER3	Reduced	6.41e-05
cg05216501	FXYD1,LGI4	Reduced	0.0022373
cg07864883	HHATL	Reduced	0.000668933
cg17714703	UHRF1	Reduced	0.00200324
cg18503260	CA13	Reduced	0.00119279
cg09012091	GPLD1,MRS2	Reduced	8.69e-05
cg01426968	C16orf45	Reduced	2.56e-05
cg24031764	TPRG1	Reduced	1.61e-05
cg18951352	ZC3H12D	Reduced	0.000285083
cg14325733	LDB1	Reduced	1.78e-05
cg19412669	STK40	Reduced	0.00131796
cg01524618	UTRN	Reduced	4.51e-05
cg02857726	TM4SF1	Reduced	0.000121814
cg06748147	CSNK1E	Reduced	3.86e-05
cg08508368	CA13	Reduced	0.00257235
cg20645040	LOC100131496,ZMYND8	Reduced	0.000119398
cg10606923	CYFIP2,FNDC9	Reduced	6.92e-06
cg18677603	LOC100131551	Reduced	4.36e-05
cg22249612	CD63	Reduced	7.53e-05
cg02633924	SEPT9,41161	Reduced	0.000125925
cg17694130	MGC4836	Reduced	0.000856596
cg04470557	SLC22A4,BC030525	Reduced	0.000414557
cg04002794	FNDC3B	Reduced	0.000201774
cg26593946	NR2F2	Reduced	0.00319037
cg19158754	ANO1	Reduced	5.25e-07
cg24671734	BTBD11	Reduced	0.00073714
cg18672030	RELL1	Reduced	0.00207734
cg15767218	ANO1	Reduced	2.18e-05
cg12278705	CYR61,DDAH1	Reduced	0.000632385
cg09182533	MACROD1,OTUB1	Reduced	0.00162903
cg24830664	SHD	Reduced	0.000288548
cg04860291	TKT	Reduced	0.00244208
cg12711760	NAV2	Reduced	3.02e-05
cg07310500	SPRED2	Reduced	0.000681091
cg14753356	IER3	Reduced	0.000231046
cg17578639	TBL1XR1	Reduced	0.000153887
cg05330472	PC,LRFN4	Reduced	0.000189969
cg13237068	CENPJ	Reduced	0.000665034
cg01859460	OAZ1	Reduced	6.47e-05
cg07277549	NOD1	Reduced	0.000297994
cg23132268	JAKMIP2	Reduced	0.000225178
cg11778563	SSBP4	Reduced	0.00114153
cg26580413	FTO	Reduced	0.000421082
cg22626683	TNFSF18	Reduced	0.0050101
cg17408789	AK021804	Reduced	0.000780129
cg10892950	ANO6	Reduced	0.000190321
cg09274587	LEPREL2	Reduced	6.14e-05
cg11421255	ANXA2	Reduced	0.00240004
cg07743764	TMEM223,NXF1	Reduced	7.53e-05
cg22756951	MLL	Reduced	0.000770903
cg05689110	DTX1	Reduced	0.00668092
cg16846518	EEFSEC,MIR1280	Reduced	4.3e-05
cg07984515	Mir_548	Reduced	3.04e-05
cg27342919	TRIM31	Reduced	0.00830112
cg04821520	RAG2	Reduced	0.00218283
cg12586150	SERPINB1	Reduced	0.000514722
cg22018051	SHC1	Reduced	0.00141348
cg24630957	KIAA1033	Reduced	0.00255818
cg26430059	FOXN3	Reduced	0.000255216
cg09889848	DIP2C,5S_rRNA	Reduced	0.00234992
cg21121843	HTT,C4orf44	Reduced	3.59e-05
cg08913523	Mir_544	Reduced	3.54e-05
cg22274117	ATXN1	Reduced	0.00130446
cg00073090	CIRBP	Reduced	6.01e-05
cg21846949	LTBP1,5S_rRNA	Reduced	0.000159187
cg04658027	CLIC1	Reduced	0.000536833
cg17335108	WIPI1	Reduced	1.21e-05
cg16892443	CST7	Reduced	0.00225268
cg14106046	B3GNTL1	Reduced	0.00361856
cg03921696	LOC339894	Reduced	0.00240004
cg10191240	WISP1	Reduced	0.000271704
cg27640064	FOXK1	Reduced	0.00197722
cg03850117	SLC7A5	Reduced	9.55e-06
cg03193328	TPST1	Reduced	0.000416845
cg09479286	NOSTRIN	Reduced	0.00450084
cg07830160	CCDC19	Reduced	0.000140066
cg19634315	THSD4	Reduced	0.000190087
cg04465154	BC017578	Reduced	0.00201298
cg09829636	ANKRD9	Reduced	0.00322471
cg06461306	HEATR2,PRKAR1B	Reduced	0.0020652
cg09537259	SESN3	Reduced	0.00289278
cg12864721	C10orf41,ZNF503-AS2	Reduced	0.00145455
cg13266096	MTA2	Reduced	5.36e-05
cg18302606	PLEKHG2	Reduced	0.00439293
cg09782560	BC036442	Reduced	8.69e-05
cg23939096	CR749689	Reduced	0.00013002
cg09510077	IGHMBP2	Reduced	0.000139771
cg13136655	ZC3H12D	Reduced	0.00134621
cg07902749	CDC42EP3	Reduced	0.00472004
cg24147596	ARL14	Reduced	7.78e-05
cg18105612	MAP3K9	Reduced	0.00215803
cg10612452	NTN1	Reduced	0.00758769
cg10806639	STARD13	Reduced	0.00172715
cg16887422	HDAC4,MIR4441	Reduced	0.00068333
cg12129897	TMEM223,NXF1	Reduced	3.58e-05
cg22157027	ODC1	Reduced	0.000422416
cg03052794	C19orf22,R3HDM4	Reduced	0.000174506
cg13414270	UNQ6975	Reduced	2.27e-05
cg23694492	TTYH3	Reduced	0.00153304
cg17491987	TACC1	Reduced	0.00528048
cg05108467	NR2F2	Reduced	0.00893184
cg21800258	AK056211	Reduced	0.00362537
cg07912766	SMAD2	Reduced	0.00184384
cg03466587	LPP	Reduced	0.000138218
cg20244073	MID1	Reduced	0.00197741
cg03046819	SHISA4	Reduced	0.00012947
cg17095652	GPR176	Reduced	1.13e-05
cg04068578	ST3GAL6	Reduced	2.36e-05
cg13414629	FREQ,NCS1	Reduced	0.000936035
cg19017553	PARD3	Reduced	0.0001458
cg03191504	RNF149	Reduced	0.000527762
cg05093999	MID1	Reduced	0.00768839
cg12138695	TM4SF4	Reduced	1.92e-05
cg04038089	AK055145	Reduced	0.00212205
cg26389380	ATG7	Reduced	0.00283322
cg04000281	STIP1	Reduced	0.000174506
cg26068160	AK055145	Reduced	0.00301695
cg14598478	ADAMTSL3,U6	Reduced	0.000351486
cg22157087	ESR1	Reduced	4.92e-06
cg11660879	CACNA1A	Reduced	0.00466687
cg19676502	AK092589	Reduced	0.00015018
cg02188190	AK055145	Reduced	0.00029384
cg10777887	RAB8B	Reduced	0.000226079
cg12452298	BX538221	Reduced	0.000360747
cg00343433	ASPH	Reduced	0.00137369
cg00539347	MGC20647	Reduced	0.000779054
cg04678916	SPTBN1	Reduced	0.00346916
cg03782966	BC061919	Reduced	0.00180427
cg05136531	THUMPD2	Reduced	0.000118501
cg20967028	ART4	Increased	0.00218283
cg20426364	FLJ22536,LINC00340	Increased	0.0017247
cg00886598	SEPP1	Increased	0.000311577
cg13264394	MBNL1,TMEM14E	Increased	1.05e-05
cg19045070	TTC36	Increased	9.25e-05
cg09323350	ROR1,AK096291	Increased	0.000401776
cg03115444	CLIP1	Increased	0.000193594
cg20391432	CRIM1	Increased	0.002015
cg10047173	ART4	Increased	0.00148487
cg08495374	FLJ22536,LINC00340	Increased	0.000767385
cg13585586	ALDOB	Increased	4.92e-06
cg22726026	HMGCS2	Increased	9.51e-05
cg01551729	SLC12A7	Increased	0.00178474
cg18242760	SLC24A5,AK021664	Increased	0.0021738
cg07153966	HOXA3,HOXA2	Increased	0.000480592
cg25934700	SELO	Increased	0.000215463
cg27617780	FMNL2	Increased	0.00236695
cg03762535	HAO2	Increased	2.92e-05
cg00629117	IGFALS	Increased	5.56e-05
cg25900280	TBX4	Increased	0.0051937
cg03635766	IGFBP4	Increased	0.000493
cg25967031	HOXA4	Increased	0.00109152
cg13759446	MMP1	Increased	0.00337288
cg00020419	CRIP3	Increased	0.000176496
cg22800743	FLJ22536,LINC00340	Increased	0.000940098
cg21932672	TMEM56,TMEM56-RWDD3	Increased	0.000536255
cg08654960	LINC00311	Increased	0.0016119
cg07942135	HOXA3	Increased	0.000153745
cg08619712	ASCL2	Increased	0.0034162
cg17547864	SNCAIP	Increased	0.00273615
cg23902105	FLJ22536,LINC00340	Increased	0.000932071
cg25469418	TMEM51,FHAD1	Increased	0.000702472
cg03650946	HOXA3	Increased	0.00511257
cg26614815	ART4	Increased	0.000712366
cg14489933	LIMS2	Increased	5.83e-05
cg24288527	PPP1R3C	Increased	0.00698792
cg01969311	U6atac	Increased	0.000566969
cg17377263	RHOBTB1	Increased	0.000121814
cg23228858	TTBK1	Increased	8.52e-06
cg07917150	HOXA3	Increased	0.00209259
cg27638288	DKK3	Increased	4.29e-05
cg23269320	HGF	Increased	0.00356515
cg13829680	VAV2	Increased	0.000360336
cg02400308	ATP10B	Increased	0.00274311
cg04500730	PRDM16,MIR4251	Increased	0.00583411
cg23169511	DQ594001	Increased	0.000296634
cg26607897	CREG1	Increased	2.39e-05
cg27499925	DOCK6,LOC55908,C19orf80	Increased	4.38e-05
cg27178567	DQ600333	Increased	0.000317788
cg04334121	SAA4	Increased	3.59e-05
cg12624523	GPLD1	Increased	2.65e-05
cg01661130	SALL1	Increased	2.18e-05
cg17964016	DEPDC6,COL14A1	Increased	6.08e-05
cg00899400	HOXA3	Increased	0.000538512
cg23398318	BCL11B	Increased	0.000259589
cg18554976	FXYD1	Increased	0.00240277
cg19778253	SCCPDH	Increased	0.000102071
cg01624229	FMNL2	Increased	0.00102355
cg15607311	LOC90586,AF047486	Increased	3.02e-05
cg16745091	CLASP1	Increased	0.00548439
cg00901574	POFUT1	Increased	3.54e-05
cg04142988	PCSK6	Increased	1.38e-05
cg15061231	FETUB	Increased	2.22e-06
cg14523602	BACE2	Increased	0.00462883
cg21987356	GCK	Increased	4.93e-05
cg13907255	NR3C1	Increased	0.000143306
cg07203817	ROR1,Mir_544	Increased	1.1e-05
cg04983687	ZFPM1	Increased	0.000342438
cg19379845	CRIM1,FEZ2	Increased	0.000279845
cg22989407	CRYAA	Increased	0.00754436
cg18087834	LOC729177	Increased	0.000379014
cg26207245	FMNL2	Increased	0.000511078
cg22798849	HOXA3	Increased	0.00239071
cg07451803	SNX18	Increased	7.65e-06
cg11944462	FAM178A	Increased	0.0051133
cg24052817	ROR1,Mir_544	Increased	0.000129992
cg10794257	HOXA3	Increased	0.000877819
cg27569203	CELSR1	Increased	0.00310099
cg04033580	UPB1,C22orf45	Increased	5.73e-05
cg25735294	FETUB	Increased	5.5e-06
cg00921266	HOXA3	Increased	0.00073305
cg26402660	LOC100133311	Increased	0.000351555
cg19931529	UGP2	Increased	0.000235815
cg07940011	DQ600333	Increased	0.000409604
cg14574905	CLASP1	Increased	0.007302
cg25729401	CYTH1	Increased	0.00401137
cg19708418	SELS	Increased	2.13e-05
cg19704902	LINC00299	Increased	0.000140771
cg08101036	HOXA3	Increased	0.000955583
cg14019146	SLC38A3	Increased	5.4e-07
cg04611788	KNG1	Increased	2.31e-05
cg03548062	LINC00523	Increased	0.000827603
cg11883238	RHOBTB1,U2	Increased	2.47e-06
cg13192013	RAPGEF2	Increased	0.000231046
cg00638202	RUNX1	Increased	0.000733665
cg17813225	FETUB	Increased	6.61e-07
cg25074170	FAM149A	Increased	0.000143306
cg13096701	RAPGEF2	Increased	0.000335836
cg15781838	LIMS2	Increased	1.19e-06
cg13404427	PDE4D,PART1	Increased	0.000468075
cg20883194	ANO6	Increased	1.24e-05
cg06349717	TMEM51,FHAD1	Increased	0.000670188
