# Supplementary material for: Hypoxia associated multi-omics molecular landscape of tumor tissue in patients with hepatocellular carcinoma
Source: Aging (Albany NY). 2021 Mar 10;13(5):6525–53. doi: 10.18632/aging.202723 (PMC7993683; doi:10.18632/aging.202723)
Supplement: Supplementary Table 12 [file aging-13-202723-s012.xlsx]

## Sheet: Table S12
Supplementary Table 12. Significant difference in RNA alternative splicing events between high hypoxia score and low hypoxia score groups in TCGA-LIHC
mRNA	Event	Event change in high hypoxia score	Adj_P value
EPHB2	RI	Reduced	6.53e-05
BICD1	AT	Reduced	0.010418
ITGB4	ES	Reduced	0.000736805
SLC16A3	AP	Reduced	1.84e-05
TMEM213	AT	Reduced	0.0255985
USO1	ES	Reduced	0.00133228
RTN4	AP	Reduced	8.31e-06
CBX5	AP	Reduced	9.29e-05
PDGFA	ES	Reduced	0.000368468
NF2	ES	Reduced	0.000317154
CNTNAP3B	AT	Reduced	0.0063879
CERCAM	RI	Reduced	0.0285579
SARDH	AP	Reduced	0.033973
SIDT2	ES	Reduced	0.00815027
CNTNAP3	AT	Reduced	0.00738585
MXI1	AP	Reduced	7.82e-05
ENDOV	AT	Reduced	0.000626691
FAM49B	AP	Reduced	0.000760774
EGFL7	AP	Reduced	0.00573598
SMARCD3	RI	Reduced	0.0260381
NUDT6	AP	Reduced	0.00527003
SULT1A3	AA	Reduced	0.0378723
CLSTN1	ES	Reduced	0.0287326
UGP2	AP	Reduced	0.00205342
SLC39A14	ME	Reduced	0.000368468
ZGPAT	AA	Reduced	0.0319932
FAH	RI	Reduced	0.0282249
TRIM7	AT	Reduced	0.0289349
THUMPD1	RI	Reduced	0.00508364
BTNL9	AT	Reduced	0.00162165
CLDN7	AP	Reduced	0.000171979
ADK	AP	Reduced	0.00170635
FAM65B	AT	Reduced	0.0197953
PLA2G15	ES	Reduced	0.0436704
BAIAP2	ES	Reduced	0.000159705
PAPSS2	ES	Reduced	0.00213004
FGFR3	ME	Reduced	0.0384096
MTSS1	ES	Reduced	0.00447221
SPTBN4	AT	Reduced	0.0116475
CCDC50	ES	Reduced	0.00865999
FARP2	AT	Reduced	0.00815027
EFCAB2	AT	Reduced	0.00750134
RAD51B	AT	Reduced	0.00182773
INO80C	ES	Reduced	0.0125976
AQP1	AP	Reduced	0.0294118
PDK1	AT	Reduced	0.00508364
NDUFC1	AP	Reduced	0.0322561
ENAH	ES	Reduced	0.00216407
AHI1	AT	Reduced	0.00225582
SS18	ES	Reduced	0.00293311
ING1	AP	Reduced	0.0326384
C21orf49	AT	Reduced	0.0252858
NPC1L1	ES	Reduced	0.0461639
HGF	AT	Reduced	0.0484014
FAM13C	AT	Reduced	0.0478914
SERPINA1	AA	Reduced	0.0391011
TMEM159	ES	Reduced	0.0483167
PILRB	RI	Reduced	0.015117
IYD	AT	Reduced	0.000609745
SLK	ES	Reduced	0.00358918
TMEM5	AD	Reduced	0.00245488
NINJ2	AP	Reduced	0.0109057
TET2	AT	Reduced	1.86e-07
SUV420H1	AT	Reduced	0.0132803
RAI14	ES	Reduced	0.00772959
SREBF1	ES	Reduced	0.0165266
PTK2B	ES	Reduced	0.0364318
ARMC8	AT	Reduced	0.00115874
FLT4	AT	Reduced	0.00577859
TMEM8B	AT	Reduced	0.0484014
TRIP10	ES	Reduced	0.0260381
MKNK2	AA	Reduced	0.0022192
NADK	AP	Reduced	0.0240993
TRMT11	ES	Reduced	0.00191159
TTC39C	AT	Reduced	4.09e-06
PI4KB	ES	Reduced	0.0167269
PCDH1	AT	Reduced	0.0074121
CLDN14	AP	Reduced	0.00213004
MAZ	AP	Reduced	0.00182773
KIAA0513	AT	Reduced	7.3e-05
RPP14	AD	Reduced	0.0207787
PARD3	AT	Reduced	0.0139224
FAM195A	ES	Reduced	0.00765821
DEF8	AT	Reduced	0.00265721
NFIC	ES	Reduced	0.0248921
KAZN	AT	Reduced	0.00148167
TERF1	ES	Reduced	0.00982884
HPS1	AT	Reduced	8.28e-06
ACSM5	AT	Reduced	0.00280895
MPRIP	ES	Reduced	0.00783861
SRSF7	RI	Reduced	0.04395
SLAIN2	ES	Reduced	0.00604889
RAPGEF3	AT	Reduced	0.0187828
SHMT2	AP	Reduced	0.00148167
CEP85L	AT	Reduced	0.0409414
SYT17	AT	Reduced	0.0432483
CUL7	AP	Reduced	0.0103373
ZC3HAV1	AT	Reduced	4.63e-05
MARK2	ES	Reduced	0.00710885
PRKCSH	AP	Reduced	0.00424182
ARHGEF10L	ES	Reduced	0.00691923
ECHDC2	ES	Reduced	0.0478382
LRRFIP2	ES	Reduced	0.0113092
PRKAB1	ES	Reduced	0.0472611
PDGFRA	AT	Reduced	0.00634278
CIRBP	AA	Reduced	0.0403296
CYP4A22	ES	Reduced	0.0137304
ASPH	AT	Reduced	0.00826127
ARHGAP24	AP	Reduced	0.0425978
PVRL2	AT	Reduced	0.0482267
TCAIM	AT	Reduced	0.0484014
JAM2	AT	Reduced	0.0226509
SNAPC3	AT	Reduced	0.0218983
MED7	AP	Reduced	0.0140196
GLIPR1	RI	Reduced	0.0221547
CEP78	AT	Reduced	0.0240993
RARA	AP	Reduced	0.0165266
SLC6A6	AT	Reduced	0.00101046
FAM104B	AT	Reduced	0.0022192
RNF115	ES	Reduced	0.00128445
KLF3	AT	Reduced	3.89e-07
SLC27A5	AP	Reduced	0.0226509
ATG16L1	ES	Reduced	0.0052406
PSIP1	AT	Reduced	0.000812444
SPTAN1	ES	Reduced	0.00668323
RIPK2	ES	Reduced	0.0157965
OGFOD2	AP	Reduced	0.0064191
HNMT	AT	Reduced	0.00607522
NUDT4	AA	Reduced	0.00423675
MTA3	AT	Reduced	0.0119109
ARL6IP4	AD	Reduced	0.0485419
TCF20	ES	Reduced	0.0401399
CMC4	AP	Reduced	1.86e-05
RAB34	AP	Reduced	0.0419403
GDAP2	AT	Reduced	0.0389965
AGPAT4	AT	Reduced	0.0438375
GABPB1	AT	Reduced	0.0108784
CCBL1	ES	Reduced	0.0103052
NTPCR	AT	Reduced	0.000984837
CLYBL	AT	Reduced	0.0308472
ILF3	AT	Reduced	0.00162165
EZR	AP	Reduced	0.0214994
SUGT1	ES	Reduced	0.0215765
TCERG1	ES	Reduced	0.0166503
GTPBP2	AP	Reduced	0.0214355
NEDD4L	ES	Reduced	0.00309356
LATS1	AT	Reduced	0.00191159
BCAP31	AP	Reduced	1.86e-05
GLYCTK	RI	Reduced	0.0403296
MGRN1	ES	Reduced	0.00765821
JMJD6	ES	Reduced	0.0290119
PPP6R2	ES	Reduced	0.0461639
HDAC4	AT	Reduced	0.00067925
PPAPDC1B	AT	Reduced	0.0364318
STAG1	AT	Reduced	0.0250273
INO80C	AA	Reduced	0.0116207
PPM1A	AT	Reduced	0.00848958
ANK3	AT	Reduced	0.0177083
ATRAID	AD	Reduced	0.0478914
PIGG	AT	Reduced	0.0116207
ZCCHC10	ES	Reduced	0.0330523
ST3GAL1	RI	Reduced	0.0149033
ITGA6	ES	Reduced	0.0271689
ABCB8	AT	Reduced	0.0366464
GEMIN7	ES	Reduced	0.0126296
TMEM62	ES	Reduced	0.0364318
TP53INP1	ES	Reduced	0.0147599
CDK2AP2	AD	Reduced	0.000522282
VWA8	AT	Reduced	0.00578573
MICAL3	AT	Reduced	4.83e-05
SCHIP1	ES	Reduced	0.0403286
ZNF524	AP	Reduced	0.0466383
CIZ1	ES	Reduced	0.0010588
KIAA1958	AT	Reduced	0.0335787
INADL	AT	Reduced	0.00429716
MFSD5	AP	Reduced	0.0426206
LYN	AD	Reduced	0.0237318
RALGPS2	ES	Reduced	0.0237318
CFLAR	AT	Reduced	0.000743726
TECPR2	AT	Reduced	0.000481281
CLEC16A	AT	Reduced	0.00216407
RNASE4	ES	Reduced	0.00914586
GUCD1	AP	Reduced	0.0472971
MTA1	ES	Reduced	0.00733624
PKIG	ES	Reduced	0.00375918
C9orf72	AT	Reduced	0.0127372
PQLC1	ES	Reduced	0.0139604
AIG1	AT	Reduced	0.00187692
SOD2	AT	Reduced	2.6e-08
BAD	RI	Reduced	5.97e-05
KIF13B	ES	Reduced	0.00827141
NRP2	AT	Reduced	0.00126995
CTPS2	AP	Reduced	0.0448765
PEX26	ES	Reduced	0.00481791
DNM2	ME	Reduced	0.00280895
SMARCA4	ES	Reduced	0.0175227
SH3BP1	AT	Reduced	0.00314292
CYB5R3	AP	Reduced	0.00106851
CTAGE5	ES	Reduced	0.00589584
KIAA1217	ES	Reduced	0.0246075
MCTP1	AT	Reduced	0.0394643
ARL16	AP	Reduced	0.0139888
C11orf74	ES	Reduced	0.0248921
ELK4	AT	Reduced	0.0307789
ZNF317	ES	Reduced	0.0403286
COQ4	AT	Reduced	0.0238892
NPEPPS	ES	Reduced	0.00681288
ZNF280D	AT	Reduced	0.0304181
NET1	AP	Reduced	0.0149033
ANKDD1A	AT	Reduced	0.0494201
PUF60	ES	Reduced	0.017903
CC2D1B	AT	Reduced	0.0188019
KIAA1429	AT	Reduced	0.0446561
FRA10AC1	ES	Reduced	0.0279575
ANKHD1	AT	Reduced	0.0149033
RALB	AA	Reduced	0.0431155
BUD31	AD	Reduced	0.0269924
ZNF7	ES	Reduced	0.0112803
PPCDC	AP	Reduced	0.0142142
IL15RA	AP	Reduced	0.0352887
DPP9	AT	Reduced	8.28e-06
TMEM161B	ES	Reduced	0.0266865
CES1	AA	Reduced	0.0439276
USP38	AT	Reduced	0.000282767
GTPBP10	ES	Reduced	0.0319167
PAK4	ES	Reduced	0.0319167
ATF5	AP	Reduced	0.00802881
QSOX1	RI	Reduced	0.0461639
CASP9	ES	Reduced	0.025043
HNRNPC	RI	Reduced	0.000609745
ASB1	ES	Reduced	0.0161944
PLOD1	ES	Reduced	0.000159705
SLC27A5	AT	Reduced	0.00161851
IP6K2	AA	Reduced	0.0434397
EGLN3	AT	Reduced	0.00211664
ICA1L	AP	Reduced	0.0232036
TXLNA	AP	Reduced	0.00223705
ABCA6	AT	Reduced	0.00213004
ZEB2	AT	Reduced	0.00375645
DNAJC2	AT	Reduced	0.0182748
NPIPB5	AP	Reduced	0.0478914
ISOC2	ES	Reduced	0.0237318
BAIAP2	AT	Reduced	0.00415942
SERPINA1	RI	Reduced	0.00639154
HNF4A	AP	Reduced	0.00974903
SYNJ2	AT	Reduced	0.0151148
USP39	RI	Reduced	0.0279245
INF2	ES	Reduced	0.0109602
DFNB31	AT	Reduced	0.000735283
SEC22C	AT	Reduced	0.0241272
CMTM7	ES	Reduced	0.017484
CDC14B	AT	Reduced	0.00607522
SLC50A1	AP	Reduced	0.0279575
TRMT44	AT	Reduced	0.0289172
FGD4	AT	Reduced	0.015944
PAICS	AP	Reduced	0.00131568
FCGRT	AP	Reduced	0.00523115
GRK6	AT	Reduced	0.00447221
CCAR2	AP	Reduced	0.0130595
RNF213	AT	Reduced	0.00681288
CHD2	AT	Reduced	0.0296534
ZFYVE20	AT	Reduced	0.000544142
HYAL1	AP	Reduced	0.033633
FLCN	AT	Reduced	0.033633
HMHA1	AP	Reduced	0.0252858
SERPINA1	RI	Reduced	0.000582433
GTF2H1	AT	Reduced	0.0137304
UBE2D2	AP	Reduced	0.0196516
ACTR3B	ES	Reduced	0.0448899
NUPL1	AT	Reduced	0.0252172
SFMBT2	AT	Reduced	0.00462174
DHRS12	AT	Reduced	0.0175765
WIPF1	AT	Reduced	0.0142363
PHF3	AT	Reduced	0.000653708
EIF6	AP	Reduced	0.0247804
SUFU	AT	Reduced	0.0181543
MEF2BNB	AT	Reduced	0.0234572
GSTA4	AP	Reduced	0.0478382
PUF60	ES	Reduced	0.00105841
CEP68	AT	Reduced	0.0401451
CXCL16	RI	Reduced	0.0485011
CSNK1D	ES	Reduced	0.00211473
PEX13	AT	Reduced	0.0417056
XBP1	RI	Reduced	0.00148167
MDH2	AT	Reduced	0.0271689
NRP1	ES	Reduced	0.000159705
MVK	ES	Reduced	0.0232647
BCL2L1	AP	Reduced	0.0063879
TXN2	AP	Reduced	0.0381539
MKL2	AT	Reduced	0.0409414
B4GALT4	RI	Reduced	0.0064191
ATP5J	AD	Reduced	0.0442558
SNX5	AT	Reduced	0.00156975
GSN	ES	Reduced	0.0171765
SCLY	AT	Reduced	0.00782168
CDC23	AT	Reduced	0.00884749
HNRNPL	ES	Reduced	0.0133883
TNKS	AT	Reduced	0.015944
CRCP	ES	Reduced	0.00765821
TULP3	RI	Reduced	0.0401423
CHID1	ES	Reduced	0.00448289
CYP51A1	AP	Reduced	0.00569282
DENND1A	AT	Reduced	0.00284369
EIF4A2	AA	Reduced	0.0447979
NF1	AT	Reduced	0.00840199
PPP1R1A	AT	Reduced	0.000582433
LDHA	ES	Reduced	0.000504914
DOCK9	AT	Reduced	0.0101827
VNN3	ES	Reduced	0.00738705
PKM	ME	Reduced	0.0350143
GCDH	ME	Reduced	0.0334634
STAT6	AD	Reduced	0.0433501
SEC31A	ES	Reduced	0.0394643
TMEM126A	AD	Reduced	0.0409063
CPSF4	AP	Reduced	0.0434397
TNFRSF12A	ES	Reduced	0.000151162
CNST	AT	Reduced	0.003389
SPTBN1	AT	Reduced	4.65e-07
BCL2L11	AT	Reduced	0.0448343
EGFR	AT	Reduced	0.0434397
PARVB	AP	Reduced	0.0279575
C17orf49	AA	Reduced	0.0332984
VPS13B	AT	Reduced	0.0334634
MPZL1	ES	Reduced	0.0148345
MFGE8	ES	Reduced	0.000461779
PLTP	ES	Reduced	0.0290119
CYFIP2	AT	Reduced	0.0204056
USP33	AT	Reduced	0.00265721
DST	AT	Reduced	9.15e-05
FIG4	AT	Reduced	0.0321439
SLC9B2	AT	Reduced	0.0478382
F10	AD	Reduced	0.0446561
COX16	ES	Reduced	0.0223412
BUD31	ES	Reduced	0.01582
PEAK1	AT	Reduced	0.00485109
KTN1	ES	Reduced	0.014275
EHMT1	AT	Reduced	0.00235434
JMJD6	AT	Reduced	0.0106905
PLGRKT	ES	Reduced	0.042227
ABCD1	AT	Reduced	0.0334634
HERC3	AT	Reduced	0.00512907
CCDC57	AT	Reduced	0.0472971
R3HDM4	ES	Reduced	0.0269924
EFEMP1	ES	Reduced	0.0494757
AP2S1	AP	Reduced	0.0149033
BLOC1S2	AP	Reduced	0.0140924
XRN1	AT	Reduced	0.00589584
C17orf62	ES	Reduced	0.0171665
LIMCH1	AT	Reduced	0.0373571
PER1	AT	Reduced	0.00750134
GPR107	AT	Reduced	3e-05
SMAGP	ES	Reduced	0.0282586
OXR1	AT	Reduced	0.000981328
VASH1	AT	Reduced	0.0478382
PRR13	AA	Reduced	0.00973983
MON2	AT	Reduced	0.0484014
SUMF2	ES	Reduced	0.0406355
CEP57	AT	Reduced	0.049869
SUPT16H	AT	Reduced	0.000171772
RPS6KA5	AT	Reduced	0.0116122
IDH1	AP	Reduced	0.0079467
PXMP2	AT	Reduced	0.0400012
RBM39	AT	Reduced	0.0409414
DDX31	AT	Reduced	0.0433618
PCK2	ES	Reduced	0.0149033
TM2D3	AT	Reduced	0.0165717
GNB5	AT	Reduced	0.000216623
FNTA	ES	Reduced	0.0102882
SHISA5	AP	Reduced	0.00607522
BANF1	AD	Reduced	0.0478914
TRIP4	AT	Reduced	0.0224848
GLYCTK	ES	Reduced	0.042227
NLRC5	AT	Reduced	0.0022192
ATF7IP	AT	Reduced	0.00314292
PLIN2	AT	Reduced	4.49e-08
PCMTD1	AT	Reduced	0.00899732
CAV2	AT	Reduced	0.0037269
RAN	ES	Reduced	0.00101046
GLE1	AT	Reduced	0.0156181
PET112	AT	Reduced	0.0295077
ADAMTS9	AT	Reduced	0.00106851
ZCCHC6	AT	Reduced	0.000172118
UHRF2	AT	Reduced	0.0167575
MVB12B	AT	Reduced	0.000582433
FAM3A	ES	Reduced	0.0434397
SNX19	AT	Reduced	0.00562579
TPD52	AP	Reduced	0.0499582
HNF4A	AT	Reduced	0.0112803
MTX1	ES	Reduced	0.00924089
FRMD8	AT	Reduced	0.0246075
RNASE4	ES	Reduced	0.00973679
CRAT	AT	Reduced	0.0478382
FKBP9	RI	Reduced	0.011218
SLC35D2	AT	Reduced	0.0437809
SEC31A	ES	Reduced	0.0111235
HAGH	ES	Reduced	0.00589584
HS1BP3	AT	Reduced	0.00796217
ZFC3H1	AT	Reduced	0.0413666
TSFM	ES	Reduced	0.0240993
C17orf62	ES	Reduced	0.00714196
SFXN5	AT	Reduced	0.0152087
TMEM18	AP	Reduced	0.0193533
SLC50A1	ES	Reduced	0.0141168
AAMDC	ES	Reduced	0.0168686
NDUFA12	ES	Reduced	0.000544142
PFDN5	ES	Reduced	0.0212459
TBXAS1	AT	Reduced	0.00280895
MAZ	AT	Reduced	0.0272502
LTBR	ES	Reduced	0.0431155
USB1	AT	Reduced	0.0409414
S100A13	ES	Reduced	0.0165266
C17orf62	ES	Reduced	0.0237318
FIBP	ES	Reduced	0.0472971
RPTOR	AT	Reduced	0.00884749
LCN2	AT	Reduced	0.0141959
PHLDB2	AT	Reduced	0.015944
LAMA4	AT	Reduced	0.0417056
ABCC3	AT	Reduced	0.0149033
UROS	AT	Reduced	0.0466383
SARDH	AT	Reduced	0.0352887
UPB1	AT	Reduced	0.0052406
UBB	AP	Reduced	0.0166726
BSG	AP	Reduced	0.0240993
APBB1IP	AT	Reduced	0.0190026
SLC2A1	AT	Reduced	0.0279575
RNASE1	AP	Reduced	0.00106851
PCSK6	AT	Reduced	0.0438183
ZNF638	AT	Reduced	0.0421494
EIF3K	AD	Reduced	0.0282076
SUB1	AP	Reduced	0.0182748
C1QTNF1	ES	Reduced	0.0197718
CD44	AT	Reduced	0.00448289
COL18A1	AP	Reduced	0.0495644
APOB	AT	Reduced	0.00823792
CYP4A11	ES	Increased	0.0199489
BAIAP2	AP	Increased	0.0197953
SLC22A1	ES	Increased	0.0116475
APOC4	AT	Increased	0.0158609
ATP2A2	RI	Increased	0.0403296
UBE2I	AT	Increased	0.0419403
MLLT6	AT	Increased	0.0289172
BCAT2	AT	Increased	0.0296534
AKR1D1	ES	Increased	0.0403296
PALLD	AT	Increased	0.042227
SNF8	AA	Increased	0.0279575
TMEM205	AD	Increased	0.0237318
ACSM2A	AT	Increased	0.0149033
MLX	AD	Increased	0.0138412
PEX19	AP	Increased	0.0327558
LDHA	AP	Increased	1.3e-06
SOD2	AP	Increased	0.00488938
MPV17	AT	Increased	0.0394511
MXRA7	AT	Increased	0.0443412
SH3GLB1	ES	Increased	0.0434397
NAA15	AT	Increased	0.0120775
FOPNL	ES	Increased	0.0435506
CYP4A22	AT	Increased	0.00447221
RNASE1	ES	Increased	0.0217414
RPL22L1	AA	Increased	0.012842
USMG5	ES	Increased	0.0260173
TOP2B	ES	Increased	0.0308472
SEC31A	AD	Increased	0.0394643
TCEB1	AT	Increased	0.0214355
ZNF511	RI	Increased	0.042227
44080	AP	Increased	0.0499702
SLC48A1	RI	Increased	0.0165806
U2AF2	AD	Increased	0.0425978
CLK3	ES	Increased	0.0432519
RPGR	AT	Increased	0.00589584
FCHSD2	AT	Increased	0.0336872
FGFR4	AD	Increased	0.00663726
ISCU	ES	Increased	0.0296981
GLS2	ES	Increased	0.00480633
PCCB	AT	Increased	0.0286424
KIDINS220	ES	Increased	0.0394948
SMCO4	AA	Increased	0.0394643
PSMD6	ES	Increased	0.0465485
CDKN1A	AD	Increased	0.00267235
COMMD7	RI	Increased	0.0114326
TTC31	ES	Increased	0.0433253
IAH1	AT	Increased	0.0425978
C12orf57	AD	Increased	0.0212692
FCER1G	AT	Increased	0.000216545
ACOT9	AP	Increased	0.00504619
NFYC	ES	Increased	0.0260381
NONO	ES	Increased	0.00642943
SIAH1	AT	Increased	0.0353728
CPNE1	ES	Increased	0.014076
FIBP	AD	Increased	0.0480538
ARPC4	AD	Increased	0.0426206
TNFAIP8L1	AP	Increased	0.0063879
EIF3A	AP	Increased	0.00107792
RPL14	AD	Increased	0.0395293
UBP1	ES	Increased	0.00815027
APTX	AA	Increased	0.0285769
LAMA5	AT	Increased	0.0212692
ACSM2B	ES	Increased	0.0389288
HAUS4	ES	Increased	0.015117
EIF3B	AA	Increased	0.0434397
TWSG1	AT	Increased	0.0152087
COA4	ES	Increased	0.00765014
SPATS2	AT	Increased	0.0327259
PCTP	AA	Increased	0.000744215
TMPRSS6	AP	Increased	0.0193533
DPY19L3	AT	Increased	0.000318194
UBE2I	ES	Increased	0.0202663
NOP16	AA	Increased	0.0351349
LAT2	AT	Increased	0.0224848
TFR2	ES	Increased	0.00840199
SLC52A2	AD	Increased	0.0434397
VEGFA	AP	Increased	7.94e-05
IL4R	ES	Increased	0.0233654
TRMU	AA	Increased	0.0494757
SERF1B	AT	Increased	0.0478914
ANAPC13	AD	Increased	0.0296534
FAM98B	AT	Increased	0.0238117
NR1I2	AP	Increased	0.0377175
APLP2	ES	Increased	0.0111709
CCDC144A	AT	Increased	0.045593
KNG1	AT	Increased	0.017903
KLC1	AA	Increased	0.00665897
SLC47A1	ES	Increased	0.0111235
PEX11A	AA	Increased	0.036174
BCHE	ES	Increased	0.0240993
C11orf24	AD	Increased	0.0191595
LGALS3	AT	Increased	0.0409414
ANAPC11	AD	Increased	0.0102882
GLB1	AP	Increased	0.0149033
GMPPA	AD	Increased	0.0112803
PSMG1	ES	Increased	0.0237318
FAM135A	AT	Increased	0.000743178
DNASE1L3	RI	Increased	0.0165095
NME4	AT	Increased	0.0251357
UQCR10	AD	Increased	0.000984837
CDKN2AIPNL	AT	Increased	8.28e-06
C9orf89	RI	Increased	0.0232333
CARD6	AT	Increased	0.0401423
CEP57L1	AT	Increased	0.0380246
NAA35	AT	Increased	0.0484014
PSMA1	AP	Increased	0.0394643
SNRPA1	ES	Increased	0.0289714
RNGTT	AT	Increased	0.035433
EPN1	AP	Increased	0.0426206
IFI6	AD	Increased	0.00480586
NTAN1	ES	Increased	0.031727
DDIT3	AA	Increased	0.00607522
NEDD9	AT	Increased	5.55e-05
CGREF1	AT	Increased	0.0407759
CRK	AD	Increased	0.0252858
MOGS	RI	Increased	0.0485031
RPP30	AT	Increased	0.0177083
CAPN1	AP	Increased	0.0260381
A1CF	AA	Increased	0.00987607
C9orf85	AT	Increased	0.00332634
FAM73B	AA	Increased	0.0119087
TMEM44	AT	Increased	0.00222633
SLC35C2	AA	Increased	0.00607522
44082	AT	Increased	0.0130595
ANGPT2	AT	Increased	0.00106851
MEPCE	AP	Increased	0.0165266
ABI1	ES	Increased	0.0114326
KTN1	ES	Increased	0.0412818
NAIP	AT	Increased	0.0242842
LLGL2	AT	Increased	0.0117802
STRA13	AD	Increased	0.00120671
TMEM219	AP	Increased	0.00191159
RNH1	ES	Increased	0.0394643
WRB	AP	Increased	0.0137304
NFX1	AT	Increased	0.0202663
FOXA2	AP	Increased	0.04395
SERF1A	AT	Increased	0.0319167
ABCB4	AA	Increased	0.00183568
TRAPPC4	AT	Increased	0.000214643
MORF4L2	AA	Increased	0.00334728
FAXDC2	ES	Increased	0.0144753
HLTF	RI	Increased	0.0478382
COL6A2	AP	Increased	0.000439315
RBFOX2	ES	Increased	0.0139989
GSTM2	AT	Increased	0.0484014
CLK1	ES	Increased	0.000171979
ZNF493	AT	Increased	0.0358529
CEP41	AT	Increased	0.0124595
C6orf1	AD	Increased	0.00454493
SLC25A10	AP	Increased	0.00343341
C1QTNF6	RI	Increased	0.00739006
GPR75-ASB3	AP	Increased	0.00709473
NAP1L1	AP	Increased	0.0204056
ETS1	AP	Increased	0.00750134
SETX	ES	Increased	0.0214355
MARK2	AP	Increased	0.0347185
DHRS1	RI	Increased	0.00447221
CREBZF	RI	Increased	0.0461639
SDSL	ES	Increased	0.0248921
AMZ2	RI	Increased	0.0425812
GK	ES	Increased	0.00101098
CD55	AT	Increased	0.0221547
TATDN3	AA	Increased	0.0439933
CREM	ES	Increased	0.0132357
EEF1E1	AT	Increased	0.00867933
HES2	AT	Increased	0.0172282
PARD3	AD	Increased	0.00415794
RBBP5	AD	Increased	0.0478914
CNDP2	AA	Increased	0.00324311
CUTC	ES	Increased	0.0305159
CLK4	ES	Increased	0.0177911
TEF	AP	Increased	0.00589584
FDPS	ES	Increased	0.0197718
PPCS	AD	Increased	0.00201662
PLA2G16	AP	Increased	0.0148345
MBNL3	ES	Increased	0.0296981
FAM107B	AP	Increased	0.0336872
SUV39H2	AD	Increased	0.0239021
MYO1G	AT	Increased	0.0321439
DECR2	AA	Increased	0.0260173
GK5	AT	Increased	0.0183204
MUM1	ES	Increased	0.0485011
ST5	ES	Increased	0.0399928
ASGR2	AA	Increased	0.0327558
RUVBL1	AP	Increased	0.00103457
ALG2	ES	Increased	0.0358529
ELP6	AP	Increased	0.00691923
EP400NL	AP	Increased	0.00304783
TBC1D23	ES	Increased	0.00984638
QKI	AA	Increased	0.00363328
DNAJC25	AT	Increased	0.000254479
ANXA6	ES	Increased	0.0108242
CYB561A3	AA	Increased	0.00840199
B4GALT4	AP	Increased	0.0260381
ASAH1	AP	Increased	0.00314292
TNFSF13	AP	Increased	0.00564449
COX20	ES	Increased	0.0139224
ZNF44	AT	Increased	0.0434397
CHEK2	ES	Increased	0.0214355
PTPRC	AT	Increased	0.00607522
CLCN6	AT	Increased	0.0108512
PPP3CB	ES	Increased	0.0367558
SLC25A37	AD	Increased	0.0434397
MAFF	AP	Increased	0.000171979
SULT1A2	RI	Increased	0.0443169
RASSF8	AT	Increased	0.0177394
TMC6	AT	Increased	0.0434397
TRIM33	ES	Increased	0.0156181
PRPF40A	ES	Increased	0.00451351
PLEKHA5	AT	Increased	0.00336838
NOL3	ES	Increased	0.0162822
SV2A	AT	Increased	0.0384096
SIRT5	AP	Increased	0.0280225
MPPE1	ES	Increased	0.00607522
TBC1D7	AD	Increased	0.0111991
KTN1	ES	Increased	3e-05
RPL32	RI	Increased	0.00343459
PLEKHB2	AP	Increased	0.0226509
DNAJC16	AT	Increased	0.00343341
DNAJC10	AT	Increased	0.0139989
OGG1	RI	Increased	0.00375918
MYOM1	ES	Increased	0.0499631
PRR26	AT	Increased	0.00664879
CYTH1	ES	Increased	0.00106851
LILRB4	ES	Increased	0.00128445
GBA	AP	Increased	0.0107445
ZKSCAN7	AT	Increased	0.00912439
PPIA	ES	Increased	0.035433
RBFOX2	AP	Increased	0.000171979
SLC6A12	AP	Increased	0.0286424
S100A13	AP	Increased	0.0241272
SLC7A2	ME	Increased	6.03e-07
WIPI2	ES	Increased	0.000531833
SLC29A1	AP	Increased	0.0323659
MYO15A	AP	Increased	0.00714196
KIF16B	AT	Increased	0.0063879
AP1B1	ES	Increased	0.00187692
C5orf45	RI	Increased	0.0226509
TIGD6	AD	Increased	0.0109439
RPL32	RI	Increased	0.0107172
FN1	ES	Increased	0.0485419
SLC44A1	AT	Increased	0.0102389
FAM193B	ES	Increased	0.0389965
SLC38A1	AT	Increased	0.000126211
MAP3K13	AT	Increased	0.00216407
VPS29	ES	Increased	0.00343459
ANKRD42	AT	Increased	0.00304783
PARD6G	AT	Increased	0.00681288
COQ10A	AP	Increased	5.55e-05
SP140L	AP	Increased	0.0457409
NR1I3	AT	Increased	0.0125976
CLK3	AP	Increased	0.00324311
CARD14	AT	Increased	0.0260173
EPHX1	AP	Increased	0.00324311
ANG	AP	Increased	0.000172118
ZNF215	AT	Increased	0.00537396
VPS9D1	AP	Increased	0.0438183
EBNA1BP2	AP	Increased	0.0149033
ANO1	ES	Increased	4.63e-06
RNASE4	AP	Increased	0.000172252
NHSL1	AP	Increased	0.0115142
EMR2	AT	Increased	0.00448289
FBXO7	AP	Increased	4.65e-07
ZSCAN20	AT	Increased	0.00668323
MASP1	AT	Increased	0.00523673
SCP2	ES	Increased	0.00489495
ST6GALNAC6	AP	Increased	0.0321439
DCAF11	AP	Increased	5.55e-05
USHBP1	RI	Increased	0.0218641
GLUL	AD	Increased	0.0214355
HMGA2	AT	Increased	0.0166726
BEAN1	AT	Increased	0.00527003
CEACAM1	ES	Increased	0.0352887
LPXN	AP	Increased	0.00211473
ASPHD1	AT	Increased	0.00733624
FAM102B	AT	Increased	4.83e-05
SHC1	AP	Increased	6.13e-05
GBP2	AP	Increased	0.00565067
RCL1	AP	Increased	0.00846723
LAMC2	AT	Increased	0.0102389
THAP4	AP	Increased	0.0419403
PEMT	AP	Increased	0.00120671
ACAN	AT	Increased	0.000769025
GULP1	AT	Increased	0.00447221
Alternate Acceptors [AA] Alternate Donors [AD] Exon Skip [ES] Retained Intron [RI] Alternate Promoters [AP] Alternate Terminators [AT] Mutually Exclusive Exons [ME]
